# Supplementary material for: Taxonomic revision of the Temnothorax salvini clade (Hymenoptera: Formicidae), with a key to the clades of New World Temnothorax
Source: PeerJ. 2021 Jun 30;9:e11514. doi: 10.7717/peerj.11514 (PMC8254503; doi:10.7717/peerj.11514)
Supplement: Supplemental Information 1 [file peerj-09-11514-s001.xlsx]

## Sheet: measurements
SpecimenCode	CollectionCode	Subfamily	Genus	Species	LifeStageSex	SpecimenNotes	OwnedBy	Adm1	Country	Elevation	ACMD	SL	FRS	CW	CWb	PoOC	CL	EL	EW	MD	WL	SPST	MPST	PEL	NOL	NOH	PEH	PPL	PPH	APT	PW	SBPA	SPTI	PEW	PNW	PPW	HFL	HFWmax	HFWmin	CS	ES	SI	OI	CI	WLI	SBI	PSI	PWI	PLI
JTLC000007440	JTL6281	Myrmicinae	Temnothorax	acuminatus_sp_nov	g	acuminatus group	JTLC	Chiapas	Mexico	1530m	1	0.513	0.227	0.739	0.719	0.301	0.75	0.219	0.162	0.139	1.203	0.258	0.311	0.365	0.204	0.146	0.293	0.217	0.282	1	0.651	0.306	0.309	0.211	0.146	0.311	0.606	0.152	0.059	1.094	0.3	71.3491	27.4223	95.8667	167.316	42.5591	21.4464	147.393	168.203
JTLC000007452	JTL6286	Myrmicinae	Temnothorax	acuminatus_sp_nov	g	acuminatus group	JTLC	Chiapas	Mexico	1530m	0	0.51	0.231	0.72	0.686	0.304	0.741	0.212	0.173	0.159	1.205	0.272	0.333	0.352	0.217	0.131	0.273	0.242	0.302	1	0.699	0.325	0.319	0.212	0.126	0.33	0.614	0.133	0.065	1.0565	0.2985	74.344	28.2537	92.5776	175.656	47.3761	22.5726	155.66	145.455
JTLC000014336	Wa-A-04-2-20	Myrmicinae	Temnothorax	acuminatus_sp_nov	g	acuminatus group	JTLC	Chiapas	Mexico	1915m	0	0.495	0.22	0.721	0.668	0.295	0.727	0.22	0.157	0.139	1.171	0.211	0.278	0.312	0.17	0.139	0.275	0.215	0.272	1	0.681	0.305	0.305	0.189	0.142	0.301	0.59	0.128	0.053	1.0315	0.2985	74.1018	28.9384	91.8845	175.299	45.6587	18.0188	159.259	145.116
CASENT0609711	DJC0031b	Myrmicinae	Temnothorax	acuminatus_sp_nov	w	acuminatus group	JTLC	Chiapas	Mexico	1780m	1	0.456	0.175	0.575	0.542	0.282	0.645	0.143	0.097	0.148	0.752	0.192	0.249	0.262	0.141	0.12	0.231	0.172	0.211	1	0.364	0.156	0.187	0.156	0.112	0.235	0.498	0.118	0.044	0.8645	0.1915	84.1328	22.1515	84.031	138.745	28.7823	25.5319	150.641	152.326
JTLC000007439	JTL6281	Myrmicinae	Temnothorax	acuminatus_sp_nov	w	acuminatus group	JTLC	Chiapas	Mexico	1530m	0	0.469	0.192	0.63	0.584	0.284	0.66	0.156	0.093	0.132	0.771	0.195	0.261	0.278	0.159	0.114	0.222	0.176	0.212	1	0.376	0.156	0.218	0.148	0.115	0.243	0.514	0.131	0.048	0.914	0.2025	80.3082	22.1554	88.4848	132.021	26.7123	25.2918	164.189	157.955
JTLC000007451	JTL6286	Myrmicinae	Temnothorax	acuminatus_sp_nov	w	acuminatus group	JTLC	Chiapas	Mexico	1530m	0	0.45	0.187	0.589	0.555	0.292	0.646	0.143	0.102	0.139	0.763	0.185	0.244	0.255	0.156	0.114	0.216	0.195	0.208	1	0.363	0.169	0.194	0.147	0.113	0.229	0.51	0.126	0.047	0.878	0.194	81.0811	22.0957	85.9133	137.477	30.4505	24.2464	155.782	130.769
JTLC000007468	JTL6278-s	Myrmicinae	Temnothorax	acuminatus_sp_nov	w	acuminatus group	JTLC	Chiapas	Mexico	1530m	0	0.509	0.215	0.641	0.614	0.316	0.713	0.164	0.107	0.153	0.837	0.194	0.286	0.277	0.155	0.118	0.24	0.211	0.221	1	0.418	0.184	0.239	0.166	0.113	0.239	0.539	0.127	0.048	0.9705	0.2175	82.899	22.4111	86.115	136.319	29.9674	23.178	143.976	131.28
JTLC000014329	Wa-A-04-2-07	Myrmicinae	Temnothorax	acuminatus_sp_nov	w	acuminatus group	UCDC	Chiapas	Mexico	1915m	1	0.491	0.219	0.62	0.578	0.287	0.668	0.148	0.112	0.135	0.802	0.178	0.267	0.274	0.143	0.128	0.224	0.2	0.206	1	0.388	0.175	0.196	0.154	0.115	0.227	0.487	0.124	0.046	0.912	0.204	84.9481	22.3684	86.5269	138.754	30.2768	22.1945	147.403	137
CASENT0640472	Wa-F-02-2-31	Myrmicinae	Temnothorax	tuxtlanus_sp_nov	w	acuminatus group	JTLC	Veracruz	Mexico	1140m	0	0.524	0.222	0.671	0.63	0.316	0.72	0.178	0.116	0.142	0.869	0.185	0.268	0.329	0.19	0.118	0.224	0.229	0.226	1	0.423	0.199	0.204	0.165	0.128	0.239	0.551	0.132	0.047	0.99	0.236	83.1746	23.8384	87.5	137.937	31.5873	21.2888	144.848	143.668
CASENT0617708	Go-C-06-4-03	Myrmicinae	Temnothorax	altinodus_sp_nov	w	altinodus group	JTLC	Cortés	Honduras	1290m	0	0.607	0.223	0.773	0.727	0.343	0.823	0.188	0.131	0.164	1.079	0.252	0.353	0.38	0.22	0.154	0.272	0.19	0.276	1	0.499	0.197	0.266	0.157	0.146	0.317	0.715	0.209	0.064	1.1385	0.2535	83.4938	22.2661	88.3354	148.418	27.0977	23.355	201.911	200
CASENT0615348	Go-C-03-2-04	Myrmicinae	Temnothorax	acutispinosus_sp_nov	w	annexus group	JTLC	Comayagua	Honduras	1720m	1	0.533	0.201	0.689	0.636	0.296	0.721	0.165	0.124	0.18	0.867	0.233	0.284	0.337	0.197	0.139	0.238	0.231	0.235	0	0.402	0.157	0.21	0.148	0.156	0.259	0.564	0.144	0.05	0.9965	0.227	83.805	22.7797	88.2108	136.321	24.6855	26.8743	175	145.887
JTLC000007450	JTL6285	Myrmicinae	Temnothorax	acutispinosus_sp_nov	w	annexus group	JTLC	Chiapas	Mexico	1530m	1	0.559	0.218	0.716	0.663	0.287	0.755	0.176	0.122	0.21	0.867	0.188	0.272	0.325	0.183	0.137	0.25	0.2	0.228	0	0.427	0.16	0.208	0.157	0.155	0.258	0.582	0.16	0.062	1.0405	0.237	84.3137	22.7775	87.8146	130.769	24.1327	21.684	164.331	162.5
CASENT0609722	DJC0056	Myrmicinae	Temnothorax	acutispinosus_sp_nov	w	annexus group	UCDC (MMPDNA#P060)	Chiapas	Mexico	1800m	1	0.608	0.232	0.77	0.725	0.324	0.816	0.195	0.124	0.203	0.964	n/a	0.338	0.332	0.204	0.137	0.263	0.207	0.242	0	0.464	0.18	n/a	0.17	0.163	0.271	0.652	0.169	0.053	1.133	0.257	83.8621	22.6831	88.848	132.966	24.8276	n/a	159.412	160.386
MCZENT00561746 (bottom)	Z867/SK	Myrmicinae	Temnothorax	annexus	w	annexus group	MCZC	Morelos	Mexico	1500m	1	0.76	0.261	0.891	0.778	0.35	0.947	0.221	0.173	0.236	1.304	0.361	0.434	0.505	0.3	0.185	0.322	0.229	0.336	0	0.572	0.284	0.329	0.234	0.25	0.405	0.85	0.274	0.081	1.2515	0.3075	97.6864	24.5705	82.1542	167.609	36.5039	27.684	173.077	220.524
MCZENT00561746 (top)	Z867/SK	Myrmicinae	Temnothorax	annexus	w	annexus group	MCZC	Morelos	Mexico	1500m	1	0.759	0.302	0.917	0.826	0.378	0.993	0.238	0.182	0.237	1.395	0.408	0.433	0.509	0.299	0.204	0.344	0.247	0.345	0	0.622	0.29	0.34	0.234	0.273	0.405	0.838	0.274	0.081	1.3225	0.329	91.8886	24.8771	83.1823	168.886	35.109	29.2473	173.077	206.073
MCZENT00561747 (bottom)	Z867/SK	Myrmicinae	Temnothorax	annexus	w	annexus group	MCZC	Morelos	Mexico	1500m	1	0.766	0.289	0.903	0.818	0.373	0.978	0.218	0.163	0.262	1.337	0.393	0.435	0.529	0.313	0.204	0.343	0.248	0.33	0	0.575	0.243	0.33	0.23	0.257	0.389	0.835	0.251	0.072	1.307	0.2995	93.643	22.9151	83.6401	163.447	29.7066	29.3942	169.13	213.306
CASENT0758357	RAJ5277	Myrmicinae	Temnothorax	arbustus_sp_nov	w	annexus group	PSWC	Baja California Sur	Mexico	385m	1	0.701	0.31	0.969	0.895	0.407	1.028	0.263	0.212	0.225	1.445	0.376	0.416	0.455	0.271	0.209	0.376	0.335	0.338	0	0.648	0.3	0.353	0.238	0.198	0.388	0.839	0.265	0.062	1.409	0.369	78.324	26.1888	87.0623	161.453	33.5196	26.0208	163.025	135.821
CASENT0733967	RAJ5277	Myrmicinae	Temnothorax	arbustus_sp_nov	w	annexus group	UCDC	Baja California Sur	Mexico	385m	1	0.683	0.306	0.928	0.848	0.394	0.962	0.24	0.196	0.227	1.357	0.38	0.439	0.477	0.279	0.196	0.351	0.294	0.354	0	0.622	0.284	0.334	0.242	0.21	0.373	0.798	0.269	0.071	1.329	0.338	80.5425	25.4327	88.1497	160.024	33.4906	28.0029	154.132	162.245
LACMENT323199 (bottom)	ANTC43738	Myrmicinae	Temnothorax	balnearius_sp_nov	g	annexus group	LACM	Baja California Sur	Mexico	210m	1	0.724	0.329	1.049	0.95	0.395	1.037	0.341	0.254	0.212	1.882	0.373	0.495	0.539	0.245	0.262	0.438	0.348	0.469	0	1.036	0.511	0.471	0.307	0.26	0.548	0.906	0.254	0.077	1.4685	0.468	76.2105	31.8693	91.6104	198.105	53.7895	19.8193	178.502	154.885
CASENT0758290 (bottom)	ANTC43738	Myrmicinae	Temnothorax	balnearius_sp_nov	w	annexus group	LACM	Baja California Sur	Mexico	210m	1	0.694	0.293	0.891	0.807	0.375	0.967	0.224	0.18	0.231	1.272	0.343	0.393	0.426	0.261	0.184	0.329	0.254	0.319	0	0.585	0.272	0.316	0.223	0.241	0.346	0.794	0.257	0.063	1.2905	0.314	85.9975	24.3317	83.454	157.621	33.7051	26.9654	155.157	167.717
CASENT0758290 (middle)	ANTC43738	Myrmicinae	Temnothorax	balnearius_sp_nov	w	annexus group	LACM	Baja California Sur	Mexico	210m	1	0.678	0.28	0.892	0.804	0.361	0.954	0.229	0.181	0.241	1.261	0.326	0.396	0.459	0.243	0.182	0.337	0.26	0.315	0	0.575	0.263	0.314	0.221	0.225	0.362	0.766	0.245	0.064	1.281	0.3195	84.3284	24.9415	84.2767	156.841	32.7114	25.8525	163.801	176.538
CASENT0758290 (top)	ANTC43738	Myrmicinae	Temnothorax	balnearius_sp_nov	w	annexus group	LACM	Baja California Sur	Mexico	210m	1	0.625	0.244	0.803	0.713	0.334	0.876	0.194	0.162	0.227	1.144	0.308	0.359	0.354	0.182	0.15	0.287	0.201	0.25	0	0.51	0.217	0.286	0.195	0.204	0.299	0.735	0.244	0.054	1.151	0.275	87.6578	23.8923	81.3927	160.449	30.4348	26.9231	153.333	176.119
LACMENT323198 (bottom)	ANTC43738	Myrmicinae	Temnothorax	balnearius_sp_nov	w	annexus group	LACM	Baja California Sur	Mexico	210m	1	0.699	0.293	0.897	0.798	0.4	0.996	0.217	0.165	0.246	1.312	0.315	0.416	0.415	0.237	0.172	0.332	0.262	0.31	0	0.599	0.271	0.303	0.226	0.244	0.38	0.794	0.257	0.072	1.296	0.2995	87.594	23.1096	80.1205	164.411	33.9599	24.0091	168.142	158.397
LACMENT323198 (middle)	ANTC43738	Myrmicinae	Temnothorax	balnearius_sp_nov	w	annexus group	LACM	Baja California Sur	Mexico	210m	1	0.689	0.279	0.892	0.806	0.378	0.968	0.223	0.171	0.233	1.27	0.336	0.4	0.439	0.248	0.175	0.321	0.246	0.308	0	0.574	0.261	0.307	0.216	0.23	0.368	0.805	0.25	0.069	1.29	0.3085	85.4839	23.9147	83.2645	157.568	32.3821	26.4567	170.37	178.455
LACMENT323198 (top)	ANTC43738	Myrmicinae	Temnothorax	balnearius_sp_nov	w	annexus group	LACM	Baja California Sur	Mexico	210m	1	0.631	0.241	0.805	0.722	0.337	0.86	0.209	0.161	0.208	1.125	0.287	0.371	0.374	0.236	0.153	0.279	0.217	0.257	0	0.518	0.207	0.256	0.188	0.183	0.326	0.708	0.223	0.056	1.152	0.2895	87.3961	25.1302	83.9535	155.817	28.6704	25.5111	173.404	172.35
LACMENT323199 (middle)	ANTC43738	Myrmicinae	Temnothorax	balnearius_sp_nov	w	annexus group	LACM	Baja California Sur	Mexico	210m	1	0.672	0.272	0.859	0.784	0.378	0.935	0.217	0.157	0.228	1.245	0.317	0.388	0.404	0.235	0.157	0.299	0.246	0.289	0	0.533	0.23	0.284	0.202	0.205	0.363	0.769	0.241	0.063	1.2515	0.2955	85.7143	23.6117	83.8503	158.801	29.3367	25.4618	179.703	164.228
LACMENT323199 (top)	ANTC43738	Myrmicinae	Temnothorax	balnearius_sp_nov	w	annexus group	LACM	Baja California Sur	Mexico	210m	1	0.653	0.246	0.802	0.717	0.344	0.869	0.207	0.149	0.218	1.12	0.289	0.331	0.384	0.228	0.16	0.28	0.224	0.313	0	0.508	0.205	0.257	0.194	0.181	0.311	0.719	0.239	0.059	1.1515	0.2815	91.0739	24.4464	82.5086	156.206	28.5914	25.8036	160.309	171.429
LACM ENT 323250	ANTC43772	Myrmicinae	Temnothorax	obtusigaster_sp_nov	w	annexus group	LACM	Baja California Sur	Mexico	390	1	0.745	0.332	1.007	0.923	0.371	1.029	0.3	0.209	0.256	1.385	0.389	0.447	0.513	0.314	0.205	0.39	0.313	0.359	1	0.665	0.284	0.382	0.24	0.28	0.414	0.84	0.27	0.081	1.4375	0.4045	80.7151	28.1391	89.6987	150.054	30.7692	28.0866	172.5	163.898
LACM ENT 323251	ANTC43772	Myrmicinae	Temnothorax	obtusigaster_sp_nov	w	annexus group	LACM	Baja California Sur	Mexico	390	1	0.755	0.326	1.026	0.918	0.359	1.044	0.295	0.191	0.266	1.433	0.41	0.431	0.526	0.308	0.192	0.382	0.298	0.351	0	0.688	0.283	0.417	0.259	0.292	0.415	0.877	0.266	0.079	1.44	0.3905	82.244	27.1181	87.931	156.1	30.8279	28.6113	160.232	176.51
MCZENT00561743 (top)	RAJBCS197	Myrmicinae	Temnothorax	obtusigaster_sp_nov	w	annexus group	MCZC	Baja California Sur	Mexico	1100	1	0.767	0.328	1.003	0.916	0.375	1.051	0.261	0.223	0.278	1.43	0.41	0.457	0.511	0.313	0.204	0.38	0.305	0.398	1	0.679	0.31	0.382	0.264	0.29	0.44	0.866	0.293	0.081	1.4415	0.3725	83.7336	25.8411	87.1551	156.114	33.8428	28.6713	166.667	167.541
CASENT0104939 (top)	RAJBCS197	Myrmicinae	Temnothorax	obtusigaster_sp_nov	w	annexus group	UCDC	Baja California Sur	Mexico	1100	1	0.753	0.302	0.95	0.868	0.361	1.007	0.258	0.177	0.248	1.366	0.391	0.417	0.516	0.284	0.169	0.337	0.283	0.337	0	0.625	0.26	0.322	0.237	0.25	0.407	0.855	0.29	0.073	1.3715	0.3465	86.7512	25.2643	86.1966	157.373	29.9539	28.6237	171.73	182.332
CASENT0758654 (top)	RAJBCS197	Myrmicinae	Temnothorax	obtusigaster_sp_nov	w	annexus group	UCDC	Baja California Sur	Mexico	1100	1	0.743	0.321	0.964	0.863	0.354	0.991	0.263	0.195	0.233	1.364	0.395	0.412	0.516	0.279	0.185	0.355	0.264	0.355	0	0.635	0.282	0.373	0.245	0.266	0.407	0.852	0.284	0.07	1.3585	0.3605	86.095	26.5366	87.0838	158.053	32.6767	28.9589	166.122	195.455
CASENT0869104	RAJBCS197	Myrmicinae	Temnothorax	obtusigaster_sp_nov	g	annexus group	RAJC	Baja California Sur	Mexico	1100	1	0.812	0.38	1.142	1.032	0.388	1.091	0.336	0.275	0.251	2.047	0.416	0.496	0.626	0.291	0.251	0.505	0.355	0.491	0	1.05	0.554	0.527	0.298	0.353	0.558	0.976	0.245	0.083	1.5775	0.4735	78.6822	30.0158	94.5921	198.353	53.6822	20.3224	187.248	176.338
LACMENT323217 (bottom)	ANTC43767	Myrmicinae	Temnothorax	quercicola_sp_nov	m	annexus group	LACM	Arizona	United States	1280	1	0.272	0.176	0.792	0.677	0.242	0.619	0.341	0.295	0.043	1.134	n/a	0.352	0.282	0.174	0.076	0.224	0.196	0.278	0	0.762	n/a	n/a	0.18	0.212	0.325	0.774	0.137	0.063	0.9865	0.4885	40.1773	49.5185	109.37	167.504	n/a	n/a	180.556	143.878
LACMENT323216 (bottom)	ANTC43766	Myrmicinae	Temnothorax	quercicola_sp_nov	g	annexus group	LACM	Arizona	United States	1220	1	0.783	0.386	1.127	1.022	0.366	1.086	0.354	0.297	0.22	2.001	0.44	0.495	0.567	0.293	0.254	0.538	0.333	0.483	0	1.154	0.496	0.503	0.312	0.356	0.591	0.942	0.282	0.1	1.565	0.5025	76.6145	32.1086	94.1068	195.793	48.5323	21.989	189.423	170.27
LACMENT323213 (top)	ANTC43763	Myrmicinae	Temnothorax	quercicola_sp_nov	w	annexus group	LACM	Arizona	United States	1280	1	0.649	0.255	0.786	0.718	0.319	0.858	0.186	0.138	0.205	1.12	0.281	0.366	0.398	0.22	0.161	0.308	0.241	0.297	1	0.508	0.215	0.256	0.204	0.229	0.349	0.679	0.225	0.06	1.147	0.255	90.39	22.2319	83.683	155.989	29.9443	25.0893	171.078	165.145
LACMENT323214 (top)	ANTC43764	Myrmicinae	Temnothorax	quercicola_sp_nov	w	annexus group	LACM	Arizona	United States	1070	1	0.631	0.261	0.817	0.728	0.331	0.854	0.218	0.146	0.191	1.101	0.267	0.358	0.39	0.207	0.166	0.31	0.211	0.296	0	0.525	0.215	0.252	0.195	0.209	0.357	0.711	0.22	0.07	1.155	0.291	86.6758	25.1948	85.2459	151.236	29.533	24.2507	183.077	184.834
LACMENT323215 (top)	ANTC43765	Myrmicinae	Temnothorax	quercicola_sp_nov	w	annexus group	LACM	Arizona	United States	1250	1	0.664	0.274	0.867	0.786	0.315	0.911	0.244	0.165	0.199	1.219	0.333	0.395	0.45	0.23	0.178	0.341	0.244	0.312	1	0.567	0.241	0.289	0.214	0.205	0.376	0.771	0.237	0.071	1.2415	0.3265	84.4784	26.2988	86.2788	155.089	30.6616	27.3175	175.701	184.426
LACMENT323217 (top)	ANTC43767	Myrmicinae	Temnothorax	quercicola_sp_nov	w	annexus group	LACM	Arizona	United States	1280	1	0.65	0.255	0.805	0.713	0.309	0.863	0.209	0.154	0.215	1.107	0.25	0.334	0.347	0.206	0.177	0.305	0.249	0.301	1	0.517	0.205	0.257	0.2	0.196	0.338	0.671	0.23	0.071	1.1445	0.286	91.1641	24.9891	82.6188	155.259	28.7518	22.5836	169	139.357
MCZENT00561744 (top)	ANTC43764	Myrmicinae	Temnothorax	quercicola_sp_nov	w	annexus group	MCZC	Arizona	United States	1070	1	0.663	0.272	0.862	0.761	0.301	0.887	0.222	0.168	0.198	1.189	0.266	0.38	0.401	0.214	0.181	0.348	0.235	0.297	0	0.538	0.239	0.282	0.215	0.224	0.381	0.742	0.222	0.059	1.2045	0.306	87.1222	25.4047	85.7948	156.242	31.406	22.3717	177.209	170.638
CASENT0758321 (top)	RAJAZ1330	Myrmicinae	Temnothorax	quercicola_sp_nov	w	annexus group	UCDC	Arizona	United States	1220m	1	0.684	0.275	0.826	0.743	0.323	0.88	0.209	0.156	0.236	1.16	0.345	0.362	0.392	0.224	0.169	0.298	0.236	0.287	1	0.546	0.218	0.27	0.204	0.193	0.339	0.753	0.248	0.064	1.183	0.287	92.0592	24.2604	84.4318	156.124	29.3405	29.7414	166.176	166.102
CASENT0105865 (top)	ANTC43769	Myrmicinae	Temnothorax	quercicola_sp_nov	w	annexus group	USNM	Arizona	United States	1275m	1	0.696	0.281	0.87	0.771	0.346	0.916	0.203	0.16	0.229	1.218	0.307	0.369	0.401	0.251	0.178	0.339	0.252	0.333	1	0.569	0.247	0.305	0.22	0.228	0.366	0.768	0.236	0.071	1.229	0.283	90.2724	23.0269	84.1703	157.977	32.0363	25.2053	166.364	159.127
CASENT0758296 (top)	ANTC43769	Myrmicinae	Temnothorax	quercicola_sp_nov	w	annexus group	USNM	Arizona	United States	1275m	1	0.681	0.271	0.86	0.757	0.338	0.898	0.207	0.155	0.239	1.174	0.307	0.42	0.381	0.237	0.165	0.341	0.258	0.314	0	0.563	0.226	0.276	0.219	0.214	0.36	0.752	0.237	0.068	1.206	0.2845	89.9604	23.5904	84.2984	155.086	29.8547	26.1499	164.384	147.674
CASENT0756078	ANTC43726	Myrmicinae	Temnothorax	tenuisculptus	g	annexus group	USNM	San Luis Potosi	Mexico		0	0.634	0.249	0.815	0.757	0.328	0.826	0.23	0.187	0.171	1.322	0.344	0.344	0.478	0.216	0.173	0.317	0.235	0.333	0	0.832	0.37	0.376	0.214	0.216	0.392	0.798	0.171	0.058	1.17	0.3235	83.7517	27.6496	91.6465	174.637	48.8771	26.0212	183.178	203.404
CASENT0756084	ANTC43726	Myrmicinae	Temnothorax	tenuisculptus	g	annexus group	USNM	San Luis Potosi	Mexico		0	0.625	0.236	0.834	0.756	0.333	0.829	0.247	0.204	0.155	1.321	0.34	0.351	0.483	0.219	0.193	0.325	0.229	0.349	0	0.833	0.361	0.366	0.224	0.216	0.408	0.774	0.193	0.076	1.1705	0.349	82.672	29.8163	91.1942	174.735	47.7513	25.7381	182.143	210.917
MCZENT00032435 (bottom)	EOW177	Myrmicinae	Temnothorax	tenuisculptus	w	annexus group	MCZC	Veracruz	Mexico	375m	0	0.525	0.181	0.628	0.575	0.274	0.688	0.142	0.113	0.165	0.813	0.216	0.256	0.34	0.168	0.119	0.196	0.166	0.191	0	0.403	0.159	0.247	0.145	0.136	0.249	0.589	0.18	0.05	0.919	0.1985	91.3043	21.5996	83.5756	141.391	27.6522	26.5683	171.724	204.819
MCZENT00032435 (top)	EOW177	Myrmicinae	Temnothorax	tenuisculptus	w	annexus group	MCZC	Veracruz	Mexico	375m	0	0.568	0.202	0.677	0.629	0.296	0.739	0.151	0.112	0.183	0.884	0.273	0.287	0.364	0.147	0.132	0.202	0.156	0.216	0	0.429	0.161	0.247	0.159	0.162	0.275	0.635	0.196	0.05	0.9985	0.207	90.3021	20.7311	85.115	140.541	25.5962	30.8824	172.956	233.333
MCZENT00578578	EOW177	Myrmicinae	Temnothorax	tenuisculptus	w	annexus group	MCZC	Veracruz	Mexico	375m	0	0.513	0.174	0.62	0.573	0.256	0.682	0.155	0.103	0.158	0.792	0.225	0.248	0.323	0.178	0.121	0.198	0.172	0.19	0	0.378	0.133	0.205	0.14	0.144	0.234	0.571	0.172	0.049	0.914	0.2065	89.5288	22.593	84.0176	138.22	23.2112	28.4091	167.143	187.791
CASENT0757196	MMP02671	Myrmicinae	Temnothorax	tenuisculptus	w	annexus group	MMPC	Veracruz	Mexico	970	0	0.569	0.199	0.667	0.621	0.29	0.724	0.154	0.127	0.16	0.884	0.285	0.32	0.336	0.191	0.149	0.246	0.187	0.212	0	0.435	0.181	0.264	0.159	0.189	0.285	0.635	0.174	0.05	0.983	0.2175	91.6264	22.1261	85.7735	142.351	29.1465	32.2398	179.245	179.679
CASENT0757197	MMP02671	Myrmicinae	Temnothorax	tenuisculptus	w	annexus group	MMPC	Veracruz	Mexico	970	0	0.501	0.171	0.575	0.516	0.255	0.647	0.134	0.096	0.163	0.748	0.241	0.244	0.3	0.162	0.12	0.196	0.172	0.183	0	0.372	0.14	0.23	0.131	0.16	0.234	0.535	0.151	0.042	0.8395	0.182	97.093	21.6796	79.7527	144.961	27.1318	32.2193	178.626	174.419
CASENT0757198	MMP02671	Myrmicinae	Temnothorax	tenuisculptus	w	annexus group	MMPC	Veracruz	Mexico	970	0	0.56	0.188	0.65	0.61	0.281	0.726	0.157	0.115	0.176	0.865	0.283	0.274	0.357	0.179	0.144	0.223	0.173	0.206	0	0.417	0.163	0.259	0.156	0.179	0.265	0.623	0.166	0.045	0.973	0.2145	91.8033	22.0452	84.022	141.803	26.7213	32.7168	169.872	206.358
CASENT0758683	MMP02671	Myrmicinae	Temnothorax	tenuisculptus	w	annexus group	MMPC	Veracruz	Mexico	970	0	0.571	0.205	0.698	0.638	0.312	0.767	0.164	0.122	0.164	0.919	0.317	0.289	0.387	0.199	0.153	0.255	0.215	0.24	0	0.456	0.194	0.274	0.16	0.202	0.288	0.667	0.184	0.05	1.0215	0.225	89.4984	22.0264	83.1812	144.044	30.4075	34.494	180	180
CASENT0756076	ANTC43726	Myrmicinae	Temnothorax	tenuisculptus	w	annexus group	USNM	San Luis Potosi	Mexico		0	0.589	0.198	0.675	0.634	0.297	0.747	0.158	0.118	0.176	0.903	0.278	0.297	0.382	0.176	0.151	0.239	0.176	0.217	0	0.447	0.179	0.26	0.164	0.182	0.281	0.668	0.199	0.056	1.0075	0.217	92.9022	21.5385	84.8728	142.429	28.2334	30.7863	171.341	217.045
CASENT0756077	ANTC43726	Myrmicinae	Temnothorax	tenuisculptus	w	annexus group	USNM	San Luis Potosi	Mexico		0	0.592	0.198	0.694	0.643	0.289	0.76	0.169	0.121	0.189	0.906	0.285	0.296	0.388	0.186	0.159	0.243	0.187	0.221	0	0.441	0.18	0.261	0.16	0.178	0.282	0.664	0.196	0.056	1.023	0.2295	92.0684	22.434	84.6053	140.902	27.9938	31.457	176.25	207.487
MCZENT00577105	ANTC43069	Myrmicinae	Temnothorax	augusti	g	augusti group	MCZC	Morelos	Mexico	1500m	1	0.746	0.288	0.874	0.819	0.361	0.931	0.255	0.197	0.204	1.437	0.323	0.416	0.483	0.224	0.216	0.373	0.279	0.311	0	0.859	0.371	0.378	0.213	0.3	0.432	0.9	0.191	0.07	1.2845	0.3535	91.0867	27.5204	87.9699	175.458	45.2991	22.4774	202.817	173.118
MCZENT00021005 (bottom)	ANTC43069	Myrmicinae	Temnothorax	augusti	w	augusti group	MCZC	Morelos	Mexico	1500m	1	0.662	0.183	0.624	0.566	0.278	0.693	0.156	0.118	0.162	0.812	0.239	0.263	0.306	0.177	0.116	0.208	0.137	0.193	0	0.383	0.144	0.161	0.128	0.172	0.239	0.681	0.155	0.046	0.9125	0.215	116.961	23.5616	81.6739	143.463	25.4417	29.4335	186.719	223.358
MCZENT00021005 (top)	ANTC43069	Myrmicinae	Temnothorax	augusti	w	augusti group	MCZC	Morelos	Mexico	1500m	1	0.605	0.19	0.63	0.588	0.297	0.737	0.16	0.153	0.173	0.884	0.252	0.247	0.34	0.212	0.124	0.225	0.153	0.186	0	0.418	0.152	0.18	0.129	0.184	0.245	0.684	0.161	0.049	0.9565	0.2365	102.891	24.7256	79.7829	150.34	25.8503	28.5068	189.922	222.222
CASENT0740646	ANTC29707	Myrmicinae	Temnothorax	aureus_sp_nov	w	augusti group	CASC	La Libertad	El Salvador	500m	0	0.588	0.201	0.606	0.546	0.251	0.676	0.155	0.112	0.157	0.802	0.31	0.26	0.324	0.144	0.131	0.248	0.162	0.202	0	0.409	0.193	0.272	0.153	0.186	0.314	0.607	0.165	0.058	0.884	0.211	107.692	23.8688	80.7692	146.886	35.348	38.6534	205.229	200
CASENT0619363	JTL7420-s	Myrmicinae	Temnothorax	aureus_sp_nov	w	augusti group	JTLC	Estelí	Nicaragua	870m	0	0.637	0.223	0.648	0.601	0.287	0.751	0.174	0.123	0.186	0.907	0.337	0.271	0.38	0.192	0.141	0.255	0.196	0.221	0	0.452	0.195	0.278	0.154	0.189	0.33	0.69	0.191	0.06	0.9765	0.2355	105.99	24.1167	80.0266	150.915	32.4459	37.1555	214.286	193.878
CASENT0756095	JKW-2012-262	Myrmicinae	Temnothorax	aureus_sp_nov	w	augusti group	MMPC	San Salvador	El Salvador	845m	0	0.638	0.211	0.638	0.569	0.286	0.738	0.17	0.122	0.18	0.84	0.335	0.262	0.365	0.175	0.142	0.245	0.171	0.206	0	0.423	0.174	0.292	0.145	0.166	0.316	0.676	0.17	0.054	0.938	0.231	112.127	24.6269	77.1003	147.627	30.58	39.881	217.931	213.45
CASENT0619364	JTL7420-s	Myrmicinae	Temnothorax	aureus_sp_nov	w	augusti group	UCDC (MMPDNA#P006)	Esteli	Nicaragua	870m	0	0.639	0.227	0.649	0.598	0.287	0.752	0.162	0.122	0.191	0.909	0.323	0.27	0.369	0.215	0.145	0.245	0.184	0.215	0	0.447	0.18	0.239	0.149	0.179	0.318	0.687	0.177	0.046	0.974	0.223	106.856	22.8953	79.5213	152.007	30.1003	35.5336	213.423	200.543
LACMENT323464 (top)	LRC2003-17	Myrmicinae	Temnothorax	casanovai_sp_nov	g	augusti group	LACM	Puebla	Mexico	1500m	1	0.806	0.263	0.869	0.788	0.355	0.897	0.244	0.187	0.2	1.406	0.324	0.391	0.464	0.274	0.209	0.375	0.212	0.312	0	0.939	0.382	0.414	0.221	0.297	0.422	0.939	0.204	0.064	1.2365	0.3375	102.284	27.2948	87.8484	178.426	48.4772	23.0441	190.95	218.868
LACMENT323460	ANTC43716	Myrmicinae	Temnothorax	casanovai_sp_nov	w	augusti group	LACM	Puebla	Mexico	1880m	1	0.751	0.204	0.702	0.638	0.34	0.825	0.178	0.136	0.193	1.01	0.323	0.308	0.385	0.224	0.15	0.265	0.149	0.201	0	0.478	0.164	0.225	0.159	0.214	0.287	0.846	0.2	0.057	1.0505	0.246	117.712	23.4174	77.3333	158.307	25.7053	31.9802	180.503	258.389
LACMENT323461	ANTC43718	Myrmicinae	Temnothorax	casanovai_sp_nov	w	augusti group	LACM	Puebla	Mexico	1880m	1	0.757	0.2	0.69	0.628	0.331	0.825	0.168	0.135	0.207	1.003	0.316	0.32	0.397	0.244	0.141	0.262	0.196	0.197	0	0.449	0.162	0.231	0.144	0.209	0.287	0.835	0.195	0.057	1.0405	0.2355	120.541	22.6333	76.1212	159.713	25.7962	31.5055	199.306	202.551
LACMENT323462	ANTC43717	Myrmicinae	Temnothorax	casanovai_sp_nov	w	augusti group	LACM	Puebla	Mexico	1880m	1	0.83	0.248	0.807	0.752	0.39	0.933	0.192	0.145	0.23	1.199	0.341	0.373	0.483	0.258	0.184	0.308	0.23	0.274	0	0.559	0.233	0.293	0.192	0.281	0.362	0.944	0.218	0.06	1.2185	0.2645	110.372	21.707	80.6002	159.441	30.984	28.4404	188.542	210
LACMENT323463	ANTC43717	Myrmicinae	Temnothorax	casanovai_sp_nov	w	augusti group	LACM	Puebla	Mexico	1880m	1	0.809	0.226	0.754	0.694	0.364	0.888	0.181	0.138	0.205	1.114	0.332	0.357	0.416	0.254	0.17	0.277	0.177	0.231	0	0.524	0.192	0.258	0.158	0.244	0.321	0.907	0.218	0.065	1.138	0.25	116.571	21.9684	78.1532	160.519	27.6657	29.8025	203.165	235.028
LACMENT323464 (bottom)	LRC2003-17	Myrmicinae	Temnothorax	casanovai_sp_nov	w	augusti group	LACM	Puebla	Mexico	1500m	1	0.668	0.199	0.677	0.619	0.317	0.776	0.174	0.137	0.178	0.947	0.263	0.295	0.337	0.197	0.144	0.239	0.143	0.179	0	0.439	0.158	0.18	0.138	0.199	0.269	0.761	0.176	0.053	1.007	0.2425	107.916	24.0814	79.768	152.989	25.525	27.7719	194.928	235.664
LACMENT323464 (middle)	LRC2003-17	Myrmicinae	Temnothorax	casanovai_sp_nov	w	augusti group	LACM	Puebla	Mexico	1500m	1	0.83	0.237	0.777	0.717	0.363	0.894	0.197	0.145	0.212	1.108	0.33	0.343	0.442	0.242	0.17	0.293	0.178	0.249	0	0.52	0.197	0.256	0.173	0.252	0.313	0.933	0.207	0.065	1.164	0.2695	115.76	23.1529	80.2013	154.533	27.4756	29.7834	180.925	248.315
LACMENT323465 (bottom)	LRC2003-17	Myrmicinae	Temnothorax	casanovai_sp_nov	w	augusti group	LACM	Puebla	Mexico	1500m	1	0.798	0.234	0.742	0.689	0.355	0.851	0.188	0.139	0.201	1.038	0.292	0.333	0.397	0.234	0.153	0.258	0.185	0.212	0	0.489	0.179	0.228	0.152	0.23	0.299	0.869	0.212	0.06	1.1145	0.2575	115.82	23.1045	80.9636	150.653	25.9797	28.131	196.711	214.595
LACMENT323465 (middle)	LRC2003-17	Myrmicinae	Temnothorax	casanovai_sp_nov	w	augusti group	LACM	Puebla	Mexico	1500m	1	0.774	0.219	0.727	0.666	0.348	0.843	0.176	0.133	0.202	1.016	0.303	0.338	0.405	0.264	0.142	0.249	0.183	0.233	0	0.477	0.171	0.233	0.161	0.235	0.299	0.838	0.207	0.063	1.0875	0.2425	116.216	22.2989	79.0036	152.553	25.6757	29.8228	185.714	221.311
LACMENT323465 (top)	LRC2003-17	Myrmicinae	Temnothorax	casanovai_sp_nov	w	augusti group	LACM	Puebla	Mexico	1500m	1	0.784	0.218	0.759	0.689	0.339	0.858	0.189	0.15	0.214	1.041	0.295	0.345	0.412	0.226	0.171	0.283	0.176	0.225	0	0.495	0.188	0.236	0.167	0.236	0.315	0.876	0.203	0.064	1.118	0.264	113.788	23.6136	80.303	151.089	27.2859	28.3381	188.623	234.091
CASENT0916001 (bottom)	PSW15573	Myrmicinae	Temnothorax	leucacanthoides_sp_nov	w	augusti group	PSWC	Oaxaca	Mexico	20m	0	0.521	0.189	0.645	0.605	0.261	0.695	0.162	0.12	0.171	0.822	0.319	0.265	0.354	0.186	0.139	0.247	0.177	0.198	0	0.436	0.175	0.272	0.15	0.174	0.319	0.583	0.173	0.044	0.9525	0.222	86.1157	23.3071	87.0504	135.868	28.9256	38.8078	212.667	200
CASENT0916001 (middle)	PSW15573	Myrmicinae	Temnothorax	leucacanthoides_sp_nov	w	augusti group	PSWC	Oaxaca	Mexico	20m	0	0.521	0.187	0.618	0.58	0.254	0.68	0.158	0.112	0.172	0.815	0.32	0.249	0.359	0.181	0.143	0.24	0.166	0.212	0	0.42	0.162	0.259	0.154	0.182	0.327	0.555	0.16	0.045	0.92	0.214	89.8276	23.2609	85.2941	140.517	27.931	39.2638	212.338	216.265
CASENT0916001 (top)	PSW15573	Myrmicinae	Temnothorax	leucacanthoides_sp_nov	w	augusti group	PSWC	Oaxaca	Mexico	20m	0	0.55	0.182	0.632	0.578	0.251	0.687	0.165	0.117	0.186	0.821	0.324	0.252	0.349	0.189	0.122	0.246	0.175	0.208	0	0.431	0.159	0.267	0.155	0.191	0.317	0.572	0.17	0.049	0.9215	0.2235	95.1557	24.2539	84.1339	142.042	27.5087	39.4641	204.516	199.429
CASENT0732606	PSW15573	Myrmicinae	Temnothorax	leucacanthoides_sp_nov	w	augusti group	UCDC	Oaxaca	Mexico	20m	0	0.567	0.197	0.634	0.591	0.256	0.704	0.158	0.117	0.188	0.828	0.336	0.276	0.365	0.194	0.134	0.26	0.166	0.211	0	0.434	0.173	0.26	0.163	0.183	0.329	0.582	0.173	0.051	0.943	0.2165	95.9391	22.9586	83.9489	140.102	29.2724	40.5797	201.84	219.88
CASENT0756102 (bottom)	PSW15573	Myrmicinae	Temnothorax	leucacanthoides_sp_nov	w	augusti group	UCDC	Oaxaca	Mexico	20m	0	0.544	0.192	0.647	0.611	0.254	0.69	0.159	0.123	0.184	0.852	0.349	0.261	0.37	0.194	0.15	0.255	0.187	0.219	0	0.452	0.176	0.272	0.156	0.186	0.336	0.592	0.151	0.044	0.956	0.2205	89.0344	23.0649	88.5507	139.444	28.8052	40.9624	215.385	197.861
CASENT0756102 (top)	PSW15573	Myrmicinae	Temnothorax	leucacanthoides_sp_nov	w	augusti group	UCDC	Oaxaca	Mexico	20m	0	0.556	0.185	0.643	0.599	0.251	0.69	0.166	0.126	0.173	0.848	0.334	0.259	0.366	0.196	0.138	0.251	0.163	0.206	0	0.43	0.166	0.28	0.152	0.179	0.34	0.603	0.145	0.047	0.944	0.229	92.8214	24.2585	86.8116	141.569	27.7129	39.3868	223.684	224.54
CASENT0758708	PSW15573	Myrmicinae	Temnothorax	leucacanthoides_sp_nov	w	augusti group	UCDC	Oaxaca	Mexico	20m	0	0.573	0.194	0.658	0.605	0.263	0.704	0.163	0.122	0.177	0.863	0.36	0.268	0.376	0.206	0.133	0.256	0.154	0.225	0	0.454	0.184	0.262	0.165	0.192	0.342	0.595	0.163	0.054	0.957	0.224	94.7107	23.4065	85.9375	142.645	30.4132	41.7149	207.273	244.156
MCZENT00577109	ANTC36515	Myrmicinae	Temnothorax	leucacanthus	g	augusti group	MCZC	Guerrero	Mexico		0	0.555	0.195	0.682	0.646	0.273	0.72	0.21	0.164	0.152	1.105	0.358	0.326	0.39	0.218	0.2	0.276	0.216	0.267	0	0.697	0.343	0.305	0.186	0.233	0.409	0.648	0.158	0.049	1.006	0.292	85.9133	29.0258	89.7222	171.053	53.096	32.3982	219.892	180.556
LACMENT323192 (bottom)	ANTC43715	Myrmicinae	Temnothorax	leucacanthus	w	augusti group	LACM	Guerrero	Mexico	350	1	0.477	0.166	0.538	0.499	0.249	0.613	0.14	0.098	0.157	0.723	0.29	0.247	0.293	0.163	0.146	0.226	0.14	0.183	0	0.361	0.14	0.204	0.124	0.153	0.265	0.492	0.166	0.041	0.8055	0.189	95.5912	23.4637	81.4029	144.89	28.0561	40.1107	213.71	209.286
LACMENT323192 (top)	ANTC43715	Myrmicinae	Temnothorax	leucacanthus	w	augusti group	LACM	Guerrero	Mexico	350	1	0.465	0.156	0.505	0.453	0.236	0.564	0.138	0.096	0.13	0.646	0.248	0.214	0.27	0.146	0.123	0.197	0.144	0.16	0	0.329	0.126	0.177	0.108	0.134	0.23	0.471	0.153	0.043	0.735	0.186	102.649	25.3061	80.3191	142.605	27.8146	38.3901	212.963	187.5
MCZENT00032434	ANTC36515	Myrmicinae	Temnothorax	leucacanthus	w	augusti group	MCZC	Guerrero	Mexico		0	0.508	0.157	0.55	0.511	0.245	0.634	0.155	0.111	0.149	0.735	0.283	0.242	0.299	0.161	0.127	0.206	0.178	0.168	0	0.372	0.152	0.202	0.125	0.139	0.255	0.545	0.154	0.049	0.828	0.2105	99.4129	25.4227	80.5994	143.836	29.7456	38.5034	204	167.978
MCZENT00577108	ANTC36515	Myrmicinae	Temnothorax	leucacanthus	w	augusti group	MCZC	Guerrero	Mexico		0	0.506	0.164	0.571	0.524	0.244	0.645	0.146	0.119	0.151	0.775	0.312	0.248	0.318	0.166	0.127	0.222	0.173	0.173	0	0.376	0.14	0.221	0.115	0.151	0.258	0.567	0.165	0.047	0.8465	0.2055	96.5649	24.2764	81.2403	147.901	26.7176	40.2581	224.348	183.815
LACMENT323429 (bottom)	RRS1968-8	Myrmicinae	Temnothorax	clandestinus_sp_nov	g	clandestinus group	LACM	Texas	United States	10m	0	0.588	0.26	0.86	0.754	0.262	0.78	0.272	0.219	0.145	1.358	0.343	0.353	0.426	0.227	0.221	0.379	0.203	0.372	0	0.728	0.35	0.342	0.215	0.265	0.404	0.769	0.177	0.044	1.144	0.3815	77.9841	33.3479	96.6667	180.106	46.4191	25.2577	187.907	209.852
LACMENT323429 (middle)	RRS1968-8	Myrmicinae	Temnothorax	clandestinus_sp_nov	w	clandestinus group	LACM	Texas	United States	10m	0	0.5	0.213	0.662	0.614	0.26	0.686	0.166	0.125	0.153	0.794	0.28	0.25	0.342	0.212	0.144	0.237	0.154	0.293	0	0.416	0.15	0.229	0.146	0.151	0.269	0.564	0.154	0.045	0.957	0.2285	81.4332	23.8767	89.5044	129.316	24.43	35.2645	184.247	222.078
LACMENT323429 (top)	RRS1968-8	Myrmicinae	Temnothorax	clandestinus_sp_nov	w	clandestinus group	LACM	Texas	United States	10m	0	0.505	0.232	0.655	0.61	0.251	0.71	0.161	0.12	0.148	0.793	0.262	0.254	0.347	0.19	0.148	0.24	0.147	0.208	0	0.407	0.143	0.232	0.155	0.169	0.288	0.576	0.172	0.048	0.965	0.221	82.7869	22.9016	85.9155	130	23.4426	33.0391	185.806	236.054
LACMENT323430 (bottom)	RRS1968-8	Myrmicinae	Temnothorax	clandestinus_sp_nov	w	clandestinus group	LACM	Texas	United States	10m	0	0.542	0.233	0.688	0.645	0.268	0.719	0.17	0.131	0.179	0.831	0.312	0.269	0.354	0.211	0.152	0.269	0.178	0.229	0	0.426	0.176	0.253	0.167	0.165	0.308	0.593	0.161	0.041	1.0045	0.2355	84.031	23.4445	89.7079	128.837	27.2868	37.5451	184.431	198.876
LACMENT323430 (middle)	RRS1968-8	Myrmicinae	Temnothorax	clandestinus_sp_nov	w	clandestinus group	LACM	Texas	United States	10m	0	0.506	0.221	0.673	0.623	0.277	0.703	0.165	0.127	0.171	0.811	0.275	0.24	0.338	0.216	0.154	0.251	0.161	0.206	0	0.424	0.159	0.233	0.156	0.161	0.279	0.584	0.158	0.049	0.9745	0.2285	81.2199	23.4479	88.6202	130.177	25.5217	33.9088	178.846	209.938
LACMENT323430 (top)	RRS1968-8	Myrmicinae	Temnothorax	clandestinus_sp_nov	w	clandestinus group	LACM	Texas	United States	10m	0	0.514	0.214	0.678	0.63	0.257	0.7	0.169	0.137	0.161	0.807	0.269	0.258	0.349	0.203	0.155	0.245	0.162	0.232	0	0.414	0.161	0.226	0.159	0.17	0.305	0.59	0.159	0.043	0.98	0.2375	81.5873	24.2347	90	128.095	25.5556	33.3333	191.824	215.432
CASENT0619604	JTL7384-s	Myrmicinae	Temnothorax	clandestinus_sp_nov	w	clandestinus group	UCDC	Madriz	Nicaragua	1415m	0	0.525	1.107	0.693	0.637	0.27	0.713	0.162	0.129	0.16	0.864	0.322	0.29	0.366	0.232	0.154	0.263	0.16	0.233	0	0.453	0.18	0.251	0.167	0.179	0.29	0.681	0.157	0.047	0.9935	0.2265	82.4176	22.7982	89.3408	135.636	28.2575	37.2685	173.653	228.75
CASENT0625205 (bottom)	PSW16363	Myrmicinae	Temnothorax	fuscatus	m	fuscatus group	JTLC	Olancho	Honduras	1640m	1	0.255	0.158	0.593	0.476	0.226	0.554	0.241	0.192	0.049	0.936	n/a	0.265	0.328	0.226	0.096	0.191	0.211	0.167	0	0.589	n/a	n/a	0.145	0.196	0.239	0.631	0.119	0.055	0.753	0.337	53.5714	44.7543	85.9206	196.639	n/a	n/a	164.828	155.45
CASENT0615617	JTL7005	Myrmicinae	Temnothorax	fuscatus	g	fuscatus group	JTLC	Olancho	Honduras	1450m	1	0.598	0.288	0.815	0.739	0.343	0.883	0.238	0.184	0.182	1.623	n/a	0.425	0.471	0.343	0.153	0.28	0.274	0.319	0	0.774	0.274	0.274	0.213	0.257	0.356	0.8	0.177	0.059	1.1805	0.33	80.9202	27.9543	83.692	219.621	37.0771	n/a	167.136	171.898
CASENT0625205 (top)	PSW16363	Myrmicinae	Temnothorax	fuscatus	g	fuscatus group	JTLC	Olancho	Honduras	1640m	0	0.573	0.302	0.817	0.733	0.344	0.858	0.253	0.18	0.164	1.597	n/a	0.414	0.469	0.325	0.145	0.263	0.238	0.297	0	0.754	0.259	n/a	0.193	0.231	0.343	0.789	0.174	0.06	1.162	0.343	78.1719	29.5181	85.4312	217.872	35.3342	n/a	177.72	197.059
LACMENT323457	ANTC43707	Myrmicinae	Temnothorax	fuscatus	g	fuscatus group	LACM	Tegucigalpa	Honduras	1585m	1	0.629	0.304	0.875	0.794	0.334	0.887	0.257	0.2	0.161	1.793	n/a	0.445	0.468	0.307	0.145	0.269	0.258	0.355	0	0.82	0.328	n/a	0.216	0.269	0.394	0.849	0.184	0.07	1.2375	0.357	79.2191	28.8485	89.5152	225.819	41.3098	n/a	182.407	181.395
CASENT0916005 (top)	PSW11561	Myrmicinae	Temnothorax	fuscatus	g	fuscatus group	PSWC	Chiapas	Mexico	1500m	1	0.646	0.321	0.885	0.815	0.358	0.919	0.275	0.182	0.188	1.756	0.275	0.416	0.494	0.291	0.15	0.301	0.3	0.365	0	0.798	0.387	0.317	0.218	0.278	0.387	0.865	0.194	0.062	1.2745	0.366	79.2638	28.7171	88.6834	215.46	47.4847	15.6606	177.523	164.667
CASENT0629025	Go-D-03-3-02	Myrmicinae	Temnothorax	fuscatus	g	fuscatus group	UCDC (MMPDNA#P085)	Jinotega	Nicaragua	1070m	1	0.63	0.286	0.842	0.738	0.361	0.916	0.266	0.198	0.165	1.699	0.237	0.416	0.438	0.319	0.121	0.245	0.244	0.336	0	0.822	0.377	0.289	0.213	0.257	0.346	0.855	0.194	0.064	1.196	0.365	85.3659	30.5184	80.5677	230.217	51.084	13.9494	162.441	179.508
CASENT0758655	PSW11559	Myrmicinae	Temnothorax	fuscatus	g	fuscatus group	UCDC (MMPDNA#P200)	Chiapas	Mexico	1500	0	0.636	0.319	0.879	0.807	0.362	0.924	0.265	0.191	0.199	1.739	0.274	0.395	0.484	0.314	0.155	0.31	0.267	0.377	0	0.803	0.334	0.306	0.236	0.29	0.386	0.859	0.197	0.067	1.269	0.3605	78.8104	28.4082	87.3377	215.489	41.3879	15.7562	163.559	181.273
CASENT0610690	Go-B-08-4-03	Myrmicinae	Temnothorax	fuscatus	w	fuscatus group	JTLC	Sacatepéquez	Guatemala	1810m	1	0.573	0.259	0.757	0.687	0.295	0.777	0.203	0.15	0.188	1.085	0.311	0.301	0.429	0.247	0.121	0.226	0.227	0.238	0	0.49	0.168	0.274	0.156	0.183	0.274	0.755	0.155	0.049	1.0755	0.278	83.4061	25.8484	88.417	157.933	24.4541	28.6636	175.641	188.987
CASENT0614147	Go-C-02-1-03	Myrmicinae	Temnothorax	fuscatus	w	fuscatus group	JTLC	Olancho	Honduras	1590m	1	0.544	0.248	0.699	0.645	0.309	0.756	0.176	0.138	0.186	1.017	0.251	0.297	0.363	0.234	0.125	0.223	0.223	0.209	0	0.431	0.151	0.233	0.141	0.153	0.265	0.715	0.163	0.051	1.023	0.245	84.3411	23.9492	85.3175	157.674	23.4109	24.6804	187.943	162.78
CASENT0625205 (middle)	PSW16363	Myrmicinae	Temnothorax	fuscatus	w	fuscatus group	JTLC	Olancho	Honduras	1640m	0	0.612	0.263	0.759	0.685	0.332	0.836	0.191	0.14	0.182	1.136	0.271	0.317	0.417	0.283	0.147	0.247	0.245	0.241	0	0.484	0.176	0.237	0.158	0.177	0.277	0.788	0.169	0.046	1.103	0.261	89.3431	23.6627	81.9378	165.839	25.6934	23.8556	175.316	170.204
CASENT0629262	Go-D-05-4-02	Myrmicinae	Temnothorax	fuscatus	w	fuscatus group	JTLC	Jinotega	Nicaragua	1430m	1	0.576	0.25	0.715	0.651	0.322	0.799	0.19	0.126	0.178	1.083	0.312	0.309	0.408	0.272	0.128	0.212	0.237	0.233	0	0.454	0.147	0.248	0.164	0.175	0.272	0.754	0.179	0.044	1.0505	0.253	88.4793	24.0838	81.4768	166.359	22.5806	28.8089	165.854	172.152
CASENT0629264	Go-D-06-2-03	Myrmicinae	Temnothorax	fuscatus	w	fuscatus group	JTLC	Nueva Segovia	Nicaragua	1410m	1	0.622	0.259	0.776	0.698	0.352	0.872	0.201	0.155	0.174	1.234	0.302	0.342	0.424	0.303	0.123	0.229	0.259	0.251	0	0.531	0.198	0.264	0.154	0.199	0.293	0.816	0.186	0.057	1.134	0.2785	89.1117	24.5591	80.0459	176.791	28.3668	24.4733	190.26	163.707
CASENT0758794 (bottom)	PSW16363	Myrmicinae	Temnothorax	fuscatus	w	fuscatus group	JTLC	Olancho	Honduras	1640m	1	0.597	0.258	0.751	0.69	0.333	0.84	0.196	0.128	0.177	1.146	0.26	0.32	0.418	0.266	0.135	0.247	0.223	0.239	0	0.48	0.177	0.247	0.155	0.163	0.276	0.805	0.163	0.053	1.11	0.26	86.5217	23.4234	82.1429	166.087	25.6522	22.6876	178.065	187.444
INBIOCRI001281867	JTL2541	Myrmicinae	Temnothorax	fuscatus	w	fuscatus group	JTLC	Puntarenas	Costa Rica	1200m	1	0.63	0.271	0.778	0.713	0.36	0.882	0.208	0.154	0.205	1.183	0.353	0.331	0.426	0.28	0.141	0.239	0.251	0.258	0	0.49	0.182	0.266	0.162	0.187	0.312	0.839	0.197	0.055	1.154	0.285	88.359	24.6967	80.839	165.919	25.5259	29.8394	192.593	169.721
CASENT0614497	Go-B-03-1-01	Myrmicinae	Temnothorax	fuscatus	w	fuscatus group	JTLC (MMPDNA#P201)	Zacapa	Guatemala	1540m	0	0.652	0.282	0.806	0.749	0.373	0.889	0.198	0.136	0.2	1.239	0.307	0.339	0.459	0.305	0.129	0.238	0.254	0.261	0	0.511	0.169	0.258	0.156	0.165	0.301	0.838	0.194	0.06	1.1935	0.266	87.0494	22.2874	84.252	165.421	22.5634	24.778	192.949	180.709
LACMENT323190	ANTC43706	Myrmicinae	Temnothorax	fuscatus	w	fuscatus group	LACM		Guatemala		0	0.625	0.271	0.804	0.749	0.304	0.834	0.214	0.156	0.231	1.17	0.339	0.323	0.458	0.324	0.146	0.255	0.253	0.257	0	0.521	0.18	0.316	0.168	0.228	0.3	0.856	0.14	0.055	1.166	0.292	83.4446	25.0429	89.8082	156.208	24.032	28.9744	178.571	181.028
MCZENT00581862	ANTC7194	Myrmicinae	Temnothorax	fuscatus	w	fuscatus group	MCZC	La Libertad	El Salvador	1600	0	0.594	0.266	0.738	0.675	0.311	0.774	0.187	0.139	0.166	1.1	0.372	0.32	0.4	0.247	0.127	0.214	0.2	0.223	0	0.485	0.18	0.31	0.149	0.173	0.246	0.767	0.17	0.058	1.062	0.2565	88	24.1525	87.2093	162.963	26.6667	33.8182	165.101	200
CASENT0916005 (bottom)	PSW11561	Myrmicinae	Temnothorax	fuscatus	w	fuscatus group	PSWC	Chiapas	Mexico	1500m	0	0.549	0.245	0.709	0.644	0.286	0.731	0.177	0.124	0.171	1.006	0.356	0.294	0.4	0.237	0.134	0.228	0.237	0.224	0	0.455	0.127	0.239	0.142	0.176	0.261	0.715	0.164	0.048	1.0095	0.239	85.2484	23.6751	88.0985	156.211	19.7205	35.3877	183.803	168.776
CASENT0916005 (middle)	PSW11561	Myrmicinae	Temnothorax	fuscatus	w	fuscatus group	PSWC	Chiapas	Mexico	1500m	0	0.603	0.262	0.765	0.706	0.315	0.807	0.197	0.138	0.18	1.133	0.38	0.327	0.454	0.271	0.142	0.24	0.234	0.238	0	0.491	0.168	0.287	0.17	0.187	0.281	0.78	0.17	0.052	1.1095	0.266	85.4108	23.9748	87.4845	160.482	23.796	33.5393	165.294	194.017
CASENT0732587	Ba-D-04-2-06-01	Myrmicinae	Temnothorax	fuscatus	w	fuscatus group	UCDC (MMPDNA#P052)	Jinotega	Nicaragua	1320m	1	0.616	0.264	0.742	0.664	0.346	0.821	0.182	0.132	0.199	1.114	0.337	0.314	0.4	0.286	0.13	0.214	0.225	0.255	0	0.477	0.15	0.251	0.154	0.165	0.282	0.77	0.177	0.053	1.0745	0.248	92.7711	23.0805	80.877	167.771	22.5904	30.2513	183.117	177.778
CASENT0732588	Go-C-01-3-03	Myrmicinae	Temnothorax	fuscatus	w	fuscatus group	UCDC (MMPDNA#P053)	Olancho	Honduras	1630m	1	0.625	0.27	0.75	0.676	0.329	0.827	0.189	0.141	0.195	1.125	0.266	0.303	0.414	0.274	0.135	0.24	0.218	0.242	0	0.464	0.177	0.254	0.155	0.181	0.264	0.783	0.178	0.065	1.0895	0.2595	92.4556	23.8183	81.7412	166.42	26.1834	23.6444	170.323	189.908
USNMENT00529240	ANTC43708	Myrmicinae	Temnothorax	fuscatus	w	fuscatus group	USNM	Sacatepéquez	Guatemala	1545m	0	0.627	0.272	0.793	0.726	0.314	0.828	0.206	0.148	0.175	1.184	0.366	0.363	0.445	0.305	0.142	0.245	0.232	0.246	0	0.516	0.19	0.309	0.163	0.202	0.271	0.802	0.178	0.077	1.14	0.28	86.3636	24.5614	87.6812	163.085	26.1708	30.9122	166.258	191.81
USNMENT00921897 (bottom)	ANTC43708	Myrmicinae	Temnothorax	fuscatus	w	fuscatus group	USNM	Sacatepéquez	Guatemala	1545m	0	0.603	0.269	0.78	0.726	0.327	0.825	0.207	0.15	0.171	1.118	0.33	0.346	0.447	0.293	0.141	0.243	0.228	0.249	0	0.506	0.188	0.304	0.159	0.2	0.277	0.797	0.166	0.056	1.1385	0.282	83.0579	24.7694	88	153.994	25.8953	29.517	174.214	196.053
USNMENT00921897 (middle)	ANTC43708	Myrmicinae	Temnothorax	fuscatus	w	fuscatus group	USNM	Sacatepéquez	Guatemala	1545m	1	0.629	0.275	0.81	0.743	0.314	0.828	0.207	0.143	0.192	1.173	0.368	0.319	0.449	0.284	0.126	0.25	0.274	0.256	0	0.527	0.17	0.292	0.168	0.207	0.28	0.813	0.182	0.059	1.157	0.2785	84.6568	24.0709	89.7343	157.873	22.8802	31.3725	166.667	163.869
INB0003659261 (bottom)	JTL5420	Myrmicinae	Temnothorax	nebliselva_sp_nov	g	fuscatus group	JTLC	Heredia	Costa Rica	1500m	0	0.602	0.328	0.851	0.772	0.357	0.856	0.245	0.196	0.153	1.567	n/a	0.407	0.47	0.328	0.128	0.275	0.248	0.306	0	0.81	0.269	0.269	0.215	0.237	0.347	0.801	0.161	0.064	1.2	0.343	77.9793	28.5833	90.1869	202.979	34.8446	n/a	161.395	189.516
INB0003659261 (top)	JTL5420	Myrmicinae	Temnothorax	nebliselva_sp_nov	w	fuscatus group	JTLC	Heredia	Costa Rica	1500m	0	0.508	0.228	0.617	0.57	0.281	0.68	0.147	0.106	0.157	0.899	0.211	0.267	0.333	0.239	0.102	0.191	0.179	0.192	0	0.405	0.141	0.201	0.136	0.12	0.21	0.564	0.125	0.039	0.91	0.2	89.1228	21.978	83.8235	157.719	24.7368	23.4705	154.412	186.034
JTLC000002967	LS2001-pasture-4-1	Myrmicinae	Temnothorax	nebliselva_sp_nov	w	fuscatus group	JTLC	Puntarenas	Costa Rica	1500m	0	0.526	0.242	0.688	0.625	0.294	0.729	0.183	0.127	0.154	0.981	0.27	0.287	0.361	0.255	0.098	0.202	0.179	0.189	0	0.403	0.146	0.2	0.146	0.125	0.234	0.647	0.137	0.043	0.9895	0.2465	84.16	24.9116	85.7339	156.96	23.36	27.5229	160.274	201.676
INB0003225001	11/RG/DBM/001	Myrmicinae	Temnothorax	nebliselva_sp_nov	w	fuscatus group	JTLC	Heredia	Costa Rica	1100m	0	0.545	0.254	0.665	0.622	0.303	0.72	0.168	0.119	0.141	0.963	0.262	0.284	0.373	0.249	0.12	0.218	0.198	0.202	0	0.459	0.17	0.246	0.147	0.139	0.245	0.639	0.147	0.054	0.982	0.2275	87.6206	23.167	86.3889	154.823	27.3312	27.2066	166.667	188.384
USNMENT00531636	ANTC43729	Myrmicinae	Temnothorax	ocarinae	w	fuscatus group	USNM		Mexico		1	0.729	0.275	0.89	0.816	0.407	0.988	0.206	0.155	0.232	1.332	0.214	0.385	0.446	0.308	0.152	0.244	0.253	0.285	1	0.578	0.174	0.163	0.173	0.208	0.359	0.894	0.251	0.06	1.31	0.2835	89.3382	21.6412	82.5911	163.235	21.3235	16.0661	207.514	176.285
MCZENT00581861	ANTC43821	Myrmicinae	Temnothorax	ocarinae	w	fuscatus group	MCZC	Jalisco	Mexico	1765m	1	0.633	0.214	0.675	0.613	0.342	0.796	0.16	0.122	0.179	1.032	0.185	0.302	0.336	0.218	0.117	0.24	0.232	0.227	1	0.435	0.103	0.121	0.138	0.152	0.289	0.681	0.191	0.05	1.011	0.221	103.263	21.8595	77.0101	168.352	16.8026	17.9264	209.42	144.828
MCZENT00577117	ANTC86	Myrmicinae	Temnothorax	skwarrae	g	fuscatus group	MCZC	Morelos	Mexico	1440m	1	0.751	0.335	1.056	1.005	0.456	1.121	0.286	0.217	0.22	1.881	0.43	0.497	0.525	0.287	0.239	0.387	0.379	0.437	1	1.018	0.417	0.392	0.263	0.186	0.576	0.979	0.267	0.078	1.5655	0.3945	74.7264	25.1996	89.6521	187.164	41.4925	22.8602	219.011	138.522
MCZENT00016358	ANTC86	Myrmicinae	Temnothorax	skwarrae	w	fuscatus group	MCZC	Morelos	Mexico	1440m	1	0.737	0.247	0.857	0.804	0.387	0.965	0.219	0.174	0.218	1.27	0.231	0.368	0.388	0.342	0.14	0.248	0.264	0.291	1	0.558	0.164	0.189	0.177	0.145	0.35	0.88	0.255	0.069	1.2865	0.306	91.6667	23.7855	83.3161	157.96	20.398	18.189	197.74	146.97
JTLC000009871	JTL6022-s	Myrmicinae	Temnothorax	achii_sp_nov	w	goniops group	JTLC	El Progreso	Guatemala	460m	0	0.375	0.171	0.485	0.442	0.22	0.541	0.114	0.09	0.114	0.611	0.157	0.196	0.258	0.149	0.098	0.168	0.156	0.176	0	0.308	0.128	0.169	0.136	0.148	0.265	0.418	0.111	0.045	0.7125	0.159	84.8416	22.3158	81.7006	138.235	28.9593	25.6956	194.853	165.385
JTLC000009876	JTL6022-s	Myrmicinae	Temnothorax	achii_sp_nov	w	goniops group	JTLC	El Progreso	Guatemala	460m	0	0.416	0.179	0.526	0.473	0.223	0.578	0.146	0.103	0.118	0.663	0.172	0.203	0.283	0.142	0.099	0.188	0.17	0.194	0	0.33	0.145	0.189	0.149	0.164	0.303	0.45	0.111	0.043	0.762	0.1975	87.9493	25.9186	81.8339	140.169	30.6554	25.9427	203.356	166.471
JTLC000009906	JTL6022-s	Myrmicinae	Temnothorax	achii_sp_nov	w	goniops group	JTLC	El Progreso	Guatemala	460m	0	0.412	0.17	0.511	0.468	0.236	0.572	0.137	0.098	0.113	0.65	0.173	0.211	0.278	0.158	0.109	0.176	0.17	0.188	0	0.327	0.139	0.182	0.145	0.161	0.301	0.445	0.118	0.044	0.754	0.186	88.0342	24.6684	81.8182	138.889	29.7009	26.6154	207.586	163.529
CASENT0758686	MB1314	Myrmicinae	Temnothorax	achii_sp_nov	w	goniops group	JTLC (MMPDNA#P184)	Chiquimula	Guatemala	1735	0	0.443	0.18	0.555	0.509	0.235	0.598	0.14	0.111	0.124	0.695	0.174	0.239	0.305	0.163	0.099	0.198	0.19	0.2	0	0.354	0.145	0.208	0.15	0.163	0.287	0.47	0.121	0.04	0.808	0.1955	87.0334	24.1955	85.1171	136.542	28.4872	25.036	191.333	160.526
CASENT0915976 (top)	PSW15097-14	Myrmicinae	Temnothorax	achii_sp_nov	w	goniops group	PSWC	Baja Verapaz	Guatemala	1480m	0	0.444	0.181	0.561	0.519	0.253	0.633	0.143	0.112	0.142	0.744	0.201	0.244	0.308	0.184	0.108	0.198	0.205	0.212	0	0.389	0.175	0.235	0.152	0.184	0.309	0.474	0.129	0.046	0.8355	0.199	85.5491	23.8181	81.9905	143.353	33.7187	27.0161	203.289	150.244
CASENT0600922	MGB626	Myrmicinae	Temnothorax	achii_sp_nov	w	goniops group	UCDC (MMPDNA#P080)	El Progreso	Guatemala	460m	0	0.417	0.165	0.508	0.463	0.244	0.567	0.135	0.11	0.113	0.647	0.183	0.227	0.282	0.167	0.101	0.18	0.166	0.197	0	0.333	0.136	0.182	0.146	0.161	0.293	0.402	0.081	0.045	0.7465	0.19	90.0648	25.4521	81.6578	139.741	29.3737	28.2844	200.685	169.88
MCZENT00032436 (top)	ANTC43709	Myrmicinae	Temnothorax	goniops	w	goniops group	MCZC	Campeche	Mexico	10m	0	0.38	0.156	0.508	0.475	0.214	0.549	0.12	0.093	0.116	0.613	0.211	0.202	0.263	0.144	0.097	0.198	0.18	0.165	0	0.335	0.157	0.26	0.144	0.201	0.288	0.396	0.109	0.045	0.7495	0.1665	80	22.2148	86.5209	129.053	33.0526	34.4209	200	146.111
MCZENT00032436 (bottom)	ANTC43709	Myrmicinae	Temnothorax	goniops	w	goniops group	MCZC	Campeche	Mexico	10m	0	0.378	0.157	0.497	0.453	0.212	0.52	0.127	0.093	0.125	0.558	0.185	0.196	0.264	0.148	0.109	0.19	0.175	0.189	0	0.317	0.147	0.219	0.141	0.174	0.273	0.365	0.106	0.042	0.713	0.1735	83.4437	24.3338	87.1154	123.179	32.4503	33.1541	193.617	150.857
CASENT0758363	ANTC43710	Myrmicinae	Temnothorax	goniops	w	goniops group	USNM	Chiapas	Mexico	2000m	0	0.395	0.16	0.524	0.488	0.213	0.562	0.13	0.089	0.122	0.611	0.222	0.196	0.275	0.137	0.121	0.204	0.139	0.161	0	0.341	0.161	0.222	0.137	0.181	0.28	0.311	0.089	0.049	0.769	0.1745	80.9426	22.6918	86.8327	125.205	32.9918	36.3339	204.38	197.842
USNMENT00529517	ANTC43711	Myrmicinae	Temnothorax	huehuetenangoi	w	goniops group	USNM		Guatemala	10m	0	0.392	0.149	0.516	0.465	0.206	0.538	0.13	0.094	0.11	0.633	0.202	0.211	0.269	0.161	0.111	0.182	0.154	0.176	0	0.332	0.141	0.207	0.127	0.148	0.261	0.42	0.119	0.04	0.734	0.177	84.3011	24.1144	86.4312	136.129	30.3226	31.9115	205.512	174.675
CASENT0611679	MGB1338	Myrmicinae	Temnothorax	ixili	g	goniops group	JTLC	Zacapa	Guatemala	600m	0	0.434	0.192	0.585	0.56	0.245	0.628	0.183	0.142	0.109	1.035	0.202	0.268	0.352	0.201	0.121	0.238	0.196	0.253	0	0.622	0.273	0.257	0.172	0.228	0.376	0.527	0.118	0.047	0.874	0.254	77.5	29.0618	89.172	184.821	48.75	19.5169	218.605	179.592
CASENT0611665	JTL6795-s	Myrmicinae	Temnothorax	ixili	w	goniops group	JTLC	Zacapa	Guatemala	475m	0	0.428	0.17	0.533	0.493	0.235	0.577	0.141	0.103	0.124	0.693	0.18	0.224	0.297	0.163	0.118	0.208	0.199	0.203	0	0.352	0.158	0.222	0.151	0.184	0.313	0.455	0.125	0.047	0.7815	0.1925	86.8154	24.6321	85.4419	140.568	32.0487	25.974	207.285	149.246
CASENT0611669	JTL6795-s	Myrmicinae	Temnothorax	ixili	w	goniops group	JTLC	Zacapa	Guatemala	475m	0	0.407	0.165	0.505	0.462	0.23	0.559	0.13	0.098	0.1	0.654	0.157	0.211	0.27	0.149	0.101	0.137	0.157	0.277	0	0.328	0.146	0.188	0.137	0.162	0.284	0.421	0.12	0.043	0.7415	0.179	88.0952	24.1403	82.6476	141.558	31.6017	24.0061	207.299	171.975
CASENT0611673	JTL6795-s	Myrmicinae	Temnothorax	ixili	w	goniops group	JTLC	Zacapa	Guatemala	475m	0	0.418	0.163	0.54	0.505	0.244	0.601	0.143	0.108	0.122	0.707	0.183	0.235	0.309	0.185	0.124	0.218	0.173	0.212	0	0.355	0.16	0.223	0.135	0.186	0.314	0.45	0.123	0.041	0.8055	0.197	82.7723	24.4569	84.0266	140	31.6832	25.884	232.593	178.613
CASENT0611678	MGB1338	Myrmicinae	Temnothorax	ixili	w	goniops group	JTLC	Zacapa	Guatemala	600m	0	0.419	0.154	0.52	0.479	0.215	0.564	0.137	0.102	0.116	0.656	0.161	0.217	0.279	0.157	0.106	0.186	0.179	0.187	0	0.336	0.152	0.177	0.138	0.167	0.292	0.466	0.116	0.04	0.761	0.188	87.4739	24.7043	84.9291	136.952	31.7328	24.5427	211.594	155.866
LACMENT323191 (top)	ANTC43712	Myrmicinae	Temnothorax	ixili	w	goniops group	LACM (paratype)		Guatemala		0	0.451	0.16	0.551	0.514	0.251	0.607	0.14	0.111	0.13	0.742	0.187	0.227	0.305	0.169	0.123	0.205	0.169	0.201	0	0.365	0.167	0.226	0.145	0.189	0.285	0.473	0.138	0.047	0.8175	0.1955	87.7432	23.9144	84.6787	144.358	32.4903	25.2022	196.552	180.473
MCZENT00581829 (top)	ANTC43713	Myrmicinae	Temnothorax	ixili	w	goniops group	MCZC (paratype)		Guatemala		0	0.429	0.166	0.515	0.467	0.226	0.586	0.131	0.102	0.117	0.69	0.16	0.217	0.274	0.174	0.113	0.185	0.192	0.172	0	0.343	0.139	0.188	0.13	0.172	0.287	0.453	0.12	0.049	0.76	0.182	91.863	23.9474	79.6928	147.752	29.7645	23.1884	220.769	142.708
CASENT0732589	MGB1338	Myrmicinae	Temnothorax	ixili	w	goniops group	UCDC (MMPDNA#P031)	Zacapa	Guatemala	600m	0	0.441	0.172	0.537	0.497	0.242	0.604	0.136	0.112	0.127	0.726	0.16	0.228	0.304	0.176	0.12	0.203	0.177	0.21	0	0.355	0.169	0.222	0.146	0.194	0.324	0.48	0.124	0.043	0.799	0.192	88.7324	24.03	82.2848	146.076	34.004	22.0386	221.918	171.751
USNMENT00529550 (top)	ANTC43714	Myrmicinae	Temnothorax	ixili	w	goniops group	USNM (holotype)		Guatemala		0	0.423	0.152	0.491	0.459	0.23	0.566	0.13	0.096	0.113	0.673	0.17	0.209	0.262	0.163	0.102	0.172	0.161	0.168	0	0.325	0.144	0.171	0.117	0.149	0.254	0.434	0.115	0.042	0.742	0.178	92.1569	23.9892	81.0954	146.623	31.3725	25.26	217.094	162.733
CASENT0758364 (top)	SF20968 46-5352	Myrmicinae	Temnothorax	ixili	w	goniops group	USNM (paratype)		Guatemala		0	0.458	0.165	0.544	0.511	0.25	0.612	0.139	0.102	0.122	0.741	0.178	0.218	0.297	0.185	0.118	0.212	0.2	0.201	0	0.369	0.155	0.214	0.149	0.186	0.308	0.481	0.122	0.044	0.817	0.19	89.6282	23.2558	83.4967	145.01	30.3327	24.0216	206.711	148.5
CASENT0632988	MBI304	Myrmicinae	Temnothorax	xincai_sp_nov	g	goniops group	JTLC (MMPDNA#P204)	Santa Rosa	Guatemala	1462m	0	0.483	0.206	0.661	0.62	0.231	0.636	0.21	0.16	0.115	1.083	0.205	0.29	0.388	0.168	0.133	0.24	0.204	0.29	0	0.633	0.296	0.275	0.188	0.221	0.37	0.584	0.129	0.05	0.938	0.29	77.9032	30.9168	97.4843	174.677	47.7419	18.9289	196.809	190.196
CASENT0632983	MBI302	Myrmicinae	Temnothorax	xincai_sp_nov	w	goniops group	JTLC	Santa Rosa	Guatemala	1469m	0	0.458	0.188	0.56	0.515	0.232	0.617	0.143	0.112	0.129	0.725	0.153	0.241	0.298	0.181	0.117	0.197	0.17	0.197	0	0.367	0.15	0.207	0.139	0.17	0.295	0.508	0.117	0.04	0.8235	0.199	88.932	24.1651	83.4684	140.777	29.1262	21.1034	212.23	175.294
MCZENT00021003 (bottom)	ANTC43066	Myrmicinae	Temnothorax	androsanus	w	pastinifer group	MCZC	The Bahamas	Bahamas	5m	0	0.528	0.206	0.612	0.565	0.253	0.657	0.151	0.117	0.159	0.706	0.274	0.23	0.295	0.164	0.145	0.249	0.167	0.219	0	0.404	0.185	0.248	0.152	0.213	0.346	0.511	0.148	0.051	0.8935	0.2095	93.4513	23.4471	85.997	124.956	32.7434	38.8102	227.632	176.647
MCZENT00021003 (second from bottom)	ANTC43066	Myrmicinae	Temnothorax	androsanus	w	pastinifer group	MCZC	The Bahamas	Bahamas	5m	0	0.472	0.188	0.569	0.545	0.241	0.594	0.132	0.099	0.134	0.637	0.253	0.213	0.244	0.153	0.14	0.227	0.165	0.194	0	0.378	0.161	0.229	0.125	0.195	0.327	0.433	0.142	0.047	0.842	0.1815	86.6055	21.5558	91.7508	116.881	29.5413	39.7174	261.6	147.879
MCZENT00021003 (second from top)	ANTC43066	Myrmicinae	Temnothorax	androsanus	w	pastinifer group	MCZC	The Bahamas	Bahamas	5m	0	0.487	0.201	0.575	0.538	0.239	0.619	0.135	0.102	0.139	0.635	0.249	0.22	0.262	0.144	0.135	0.221	0.189	0.196	0	0.393	0.145	0.231	0.149	0.211	0.333	0.482	0.155	0.035	0.8475	0.186	90.5204	21.9469	86.9144	118.03	26.9517	39.2126	223.49	138.624
MCZENT00021003 (top)	ANTC43066	Myrmicinae	Temnothorax	androsanus	w	pastinifer group	MCZC	The Bahamas	Bahamas	5m	0	0.508	0.194	0.598	0.547	0.249	0.632	0.13	0.099	0.135	0.674	0.258	0.214	0.273	0.156	0.15	0.244	0.174	0.219	0	0.386	0.167	0.234	0.148	0.211	0.336	0.481	0.15	0.041	0.863	0.1795	92.8702	20.7995	86.5506	123.218	30.5302	38.2789	227.027	156.897
CASENT0758350 (bottom)	ANTC42943	Myrmicinae	Temnothorax	androsanus	w	pastinifer group	PSWC	Exuma Cays	Bahamas	5m	1	0.508	0.187	0.585	0.538	0.238	0.611	0.144	0.102	0.16	0.672	0.29	0.22	0.289	0.146	0.138	0.224	0.168	0.211	0	0.387	0.174	0.262	0.145	0.225	0.331	0.471	0.147	0.05	0.8435	0.195	94.4238	23.118	88.0524	124.907	32.342	43.1548	228.276	172.024
CASENT0758350 (middle)	ANTC42943	Myrmicinae	Temnothorax	androsanus	w	pastinifer group	PSWC	Exuma Cays	Bahamas	5m	1	0.494	0.188	0.555	0.508	0.234	0.593	0.131	0.098	0.158	0.625	0.232	0.212	0.251	0.161	0.115	0.217	0.165	0.203	0	0.369	0.144	0.251	0.144	0.203	0.316	0.473	0.135	0.05	0.8045	0.18	97.2441	22.3741	85.6661	123.031	28.3465	37.12	219.444	152.121
CASENT0758350 (top)	ANTC42943	Myrmicinae	Temnothorax	androsanus	w	pastinifer group	PSWC	Exuma Cays	Bahamas	5m	1	0.467	0.169	0.525	0.48	0.223	0.572	0.12	0.09	0.155	0.609	0.205	0.191	0.241	0.144	0.128	0.214	0.159	0.192	0	0.35	0.166	0.219	0.127	0.19	0.309	0.442	0.131	0.053	0.766	0.165	97.2917	21.5405	83.9161	126.875	34.5833	33.6617	243.307	151.572
CASENT0915979 (bottom)	ANTC42943	Myrmicinae	Temnothorax	androsanus	w	pastinifer group	PSWC	Exuma Cays	Bahamas	5m	1	0.473	0.161	0.51	0.466	0.214	0.548	0.112	0.084	0.154	0.598	0.234	0.189	0.239	0.126	0.122	0.213	0.154	0.173	0	0.338	0.145	0.216	0.139	0.195	0.31	0.417	0.126	0.044	0.74	0.154	101.502	20.8108	85.0365	128.326	31.1159	39.1304	223.022	155.195
CASENT0915979 (top)	ANTC42943	Myrmicinae	Temnothorax	androsanus	w	pastinifer group	PSWC	Exuma Cays	Bahamas	5m	1	0.49	0.178	0.546	0.503	0.223	0.575	0.118	0.087	0.148	0.632	0.233	0.198	0.241	0.124	0.132	0.219	0.152	0.19	0	0.355	0.158	0.258	0.138	0.193	0.309	0.434	0.125	0.049	0.7905	0.1615	97.4155	20.4301	87.4783	125.646	31.4115	36.8671	223.913	158.553
MCZENT00577113 (bottom)	ANTC43728	Myrmicinae	Temnothorax	nigricans	g	pastinifer group	MCZC	Matanzas	Cuba	5m	0	0.52	0.23	0.687	0.646	0.251	0.675	0.183	0.158	0.16	1.008	0.269	0.262	0.317	0.175	0.164	0.287	0.182	0.25	0	0.628	0.345	0.312	0.174	0.213	0.432	0.589	0.144	0.059	0.9835	0.262	80.4954	26.6396	95.7037	156.037	53.4056	26.6865	248.276	174.176
MCZENT00577113 (top)	ANTC43728	Myrmicinae	Temnothorax	nigricans	g	pastinifer group	MCZC	Matanzas	Cuba	5m	0	0.469	0.212	0.637	0.59	0.245	0.627	0.173	0.132	0.155	0.903	0.259	0.265	0.287	0.16	0.131	0.257	0.187	0.226	0	0.554	0.287	0.273	0.149	0.194	0.371	0.535	0.128	0.056	0.9035	0.239	79.4915	26.4527	94.0989	153.051	48.6441	28.6822	248.993	153.476
MCZENT00016365 (top)	ANTC43728	Myrmicinae	Temnothorax	nigricans	w	pastinifer group	MCZC	Matanzas	Cuba	5m	0	0.454	0.179	0.514	0.46	0.211	0.545	0.115	0.09	0.135	0.583	0.244	0.209	0.236	0.135	0.105	0.182	0.131	0.163	0	0.353	0.147	0.23	0.118	0.154	0.282	0.431	0.122	0.054	0.7325	0.16	98.6957	21.843	84.4037	126.739	31.9565	41.8525	238.983	180.153
MCZENT00577110 (middle)	ANTC43728	Myrmicinae	Temnothorax	nigricans	w	pastinifer group	MCZC	Matanzas	Cuba	5m	0	0.473	0.169	0.552	0.515	0.226	0.581	0.131	0.104	0.139	0.648	0.263	0.233	0.278	0.153	0.127	0.234	0.158	0.188	0	0.386	0.155	0.264	0.142	0.184	0.301	0.473	0.144	0.055	0.8055	0.183	91.8447	22.7188	88.6403	125.825	30.0971	40.5864	211.972	175.949
MCZENT00577111 (top)	ANTC43728	Myrmicinae	Temnothorax	nigricans	w	pastinifer group	MCZC	Matanzas	Cuba	5m	0	0.512	0.182	0.573	0.524	0.237	0.602	0.128	0.101	0.154	0.667	0.289	0.229	0.249	0.177	0.141	0.216	0.154	0.197	0	0.389	0.174	0.258	0.132	0.189	0.303	0.483	0.137	0.047	0.825	0.1785	97.7099	21.6364	87.0432	127.29	33.2061	43.3283	229.545	161.688
MCZENT00577112 top)	ANTC43728	Myrmicinae	Temnothorax	nigricans	w	pastinifer group	MCZC	Matanzas	Cuba	5m	0	0.489	0.189	0.552	0.502	0.23	0.589	0.127	0.099	0.15	0.663	0.273	0.211	0.256	0.142	0.12	0.221	0.157	0.198	0	0.393	0.175	0.226	0.132	0.189	0.296	0.475	0.153	0.059	0.7965	0.1765	97.4104	22.1594	85.2292	132.072	34.8606	41.1765	224.242	163.057
MCZENT00577114 (bottom)	ANTC43728	Myrmicinae	Temnothorax	nigricans	w	pastinifer group	MCZC	Matanzas	Cuba	5m	0	0.471	0.171	0.523	0.479	0.227	0.558	0.119	0.099	0.144	0.6	0.257	0.205	0.249	0.151	0.116	0.206	0.144	0.172	0	0.347	0.143	0.23	0.117	0.168	0.272	0.48	0.127	0.049	0.758	0.1685	98.3299	22.2296	85.8423	125.261	29.8539	42.8333	232.479	172.917
CASENT0758264 (top)	ANTC43728	Myrmicinae	Temnothorax	nigricans	w	pastinifer group	USNM	Matanzas	Cuba	5m	0	0.454	0.176	0.502	0.452	0.221	0.532	0.116	0.091	0.136	0.574	0.256	0.192	0.212	0.131	0.114	0.193	0.133	0.166	0	0.35	0.145	0.252	0.11	0.164	0.259	0.419	0.13	0.058	0.718	0.1615	100.442	22.493	84.9624	126.991	32.0796	44.5993	235.455	159.398
CASENT0758265 (top)	ANTC43728	Myrmicinae	Temnothorax	nigricans	w	pastinifer group	USNM	Matanzas	Cuba	5m	0	0.484	0.184	0.542	0.491	0.229	0.581	0.125	0.095	0.135	0.6	0.256	0.211	0.255	0.157	0.12	0.216	0.154	0.193	0	0.368	0.156	0.249	0.117	0.165	0.269	0.491	0.136	0.053	0.7815	0.1725	98.5743	22.0729	84.5095	122.2	31.7719	42.6667	229.915	165.584
CASENT0758857 (top)		Myrmicinae	Temnothorax	pastinifer	g	pastinifer group	MDC	Berry Islands	Bahamas	10m	1	0.895	0.332	0.906	0.839	0.362	0.897	0.237	0.18	0.219	1.443	0.301	0.362	0.48	0.239	0.239	0.38	0.207	0.323	0	0.934	0.41	0.361	0.224	0.273	0.524	1.026	0.211	0.083	1.2875	0.327	106.675	25.3981	93.534	171.99	48.8677	20.8593	233.929	231.884
CASENT0758269	ANTC43736	Myrmicinae	Temnothorax	pastinifer	g	pastinifer group	USNM	The Bahamas	Bahamas	5m	1	0.856	0.323	0.897	0.815	0.359	0.9	0.216	0.168	0.214	1.465	0.394	0.386	0.51	0.26	0.235	0.389	n/a	n/a	0	0.822	0.422	0.423	0.247	0.312	n/a	0.935	0.168	0.084	1.265	0.3	105.031	23.7154	90.5556	179.755	51.7791	26.8942	n/a	n/a
CASENT0758857 (bottom)		Myrmicinae	Temnothorax	pastinifer	w	pastinifer group	MDC	Berry Islands	Bahamas	10m	1	0.906	0.239	0.784	0.738	0.347	0.847	0.177	0.134	0.235	1.058	0.399	0.299	0.366	0.223	0.205	0.308	0.166	0.23	0	0.566	0.245	0.316	0.179	0.249	0.379	1.01	0.224	0.075	1.1615	0.244	122.764	21.0073	87.1311	143.36	33.1978	37.7127	211.732	220.482
CASENT0758857 (second from bottom)		Myrmicinae	Temnothorax	pastinifer	w	pastinifer group	MDC	Berry Islands	Bahamas	10m	1	0.881	0.224	0.78	0.725	0.335	0.829	0.165	0.141	0.203	0.989	0.414	0.288	0.38	0.22	0.206	0.299	0.169	0.219	0	0.54	0.218	0.301	0.169	0.234	0.37	0.98	0.225	0.082	1.1395	0.2355	121.517	20.667	87.4548	136.414	30.069	41.8605	218.935	224.852
CASENT0758857 (second from top)		Myrmicinae	Temnothorax	pastinifer	w	pastinifer group	MDC	Berry Islands	Bahamas	10m	1	0.886	0.23	0.814	0.748	0.347	0.862	0.177	0.119	0.239	1.046	0.413	0.305	0.372	0.206	0.226	0.321	0.158	0.252	0	0.551	0.258	0.359	0.183	0.257	0.387	0.998	0.215	0.074	1.179	0.2365	118.449	20.0594	86.7749	139.84	34.492	39.4837	211.475	235.443
CASENT0915977 (bottom)	ANTC4024	Myrmicinae	Temnothorax	pastinifer	w	pastinifer group	PSWC	Exuma	Bahamas	10m	1	0.852	0.313	0.786	0.728	0.346	0.84	0.163	0.133	0.216	0.978	0.426	0.274	0.349	0.228	0.188	0.297	0.153	0.209	0	0.565	0.216	0.358	0.161	0.24	0.356	0.939	0.187	0.069	1.148	0.2295	117.033	19.9913	86.6667	134.341	29.6703	43.5583	221.118	228.105
CASENT0915977 (top)	ANTC4024	Myrmicinae	Temnothorax	pastinifer	w	pastinifer group	PSWC	Exuma	Bahamas	10m	1	0.828	0.314	0.78	0.7	0.327	0.803	0.168	0.128	0.187	0.937	0.382	0.291	0.341	0.232	0.196	0.297	0.157	0.237	0	0.556	0.216	0.332	0.167	0.249	0.365	0.896	0.197	0.069	1.1015	0.232	118.286	21.0622	87.1731	133.857	30.8571	40.7684	218.563	217.197
CASENT0106606	ANTC4024	Myrmicinae	Temnothorax	pastinifer	w	pastinifer group	UCDC	Exuma	Bahamas	10m	1	0.838	0.291	0.796	0.723	0.355	0.854	0.18	0.13	0.207	0.99	0.422	0.272	0.355	0.227	0.198	0.298	0.178	0.225	0	0.582	0.241	0.344	0.174	0.247	0.386	0.952	0.191	0.071	1.15	0.245	115.906	21.3043	84.6604	136.929	33.3333	42.6263	221.839	199.438
CASENT0732596 (bottom)	ANTC43047	Myrmicinae	Temnothorax	pastinifer	w	pastinifer group	UCDC	Exuma	Bahamas	10m	1	n/a	0.224	0.617	0.554	0.282	0.661	0.142	0.108	0.165	0.773	0.293	0.234	0.25	0.159	0.141	0.217	0.145	0.15	0	0.438	0.166	0.229	0.125	0.176	0.217	0.784	0.172	0.06	0.8845	0.196	n/a	22.1594	83.8124	139.531	29.9639	37.9043	173.6	172.414
CASENT0732596 (top)	ANTC43047	Myrmicinae	Temnothorax	pastinifer	w	pastinifer group	UCDC	Exuma	Bahamas	10m	1	0.857	0.295	0.77	0.725	0.331	0.82	0.174	0.118	0.2	0.962	0.424	0.289	0.346	0.215	0.205	0.308	0.177	0.228	0	0.553	0.231	0.34	0.17	0.245	0.369	0.953	0.2	0.072	1.135	0.233	118.207	20.5286	88.4146	132.69	31.8621	44.0748	217.059	195.48
CASENT0758267 (bottom)	ANTC43733	Myrmicinae	Temnothorax	pastinifer	w	pastinifer group	USNM	The Bahamas	Bahamas	5m	1	0.923	0.322	0.826	0.772	0.366	0.864	0.18	0.13	0.239	1.054	0.434	0.302	0.418	0.246	0.233	0.34	n/a	n/a	0	0.572	0.25	0.34	0.182	0.265	n/a	1.035	0.22	0.078	1.204	0.245	119.56	20.3488	89.3519	136.528	32.3834	41.1765	n/a	n/a
CASENT0758267 (middle)	ANTC43733	Myrmicinae	Temnothorax	pastinifer	w	pastinifer group	USNM	The Bahamas	Bahamas	5m	1	0.899	0.27	0.767	0.71	0.342	0.816	0.167	0.114	0.221	0.986	0.496	0.282	0.378	0.224	0.216	0.313	0.181	0.211	0	0.534	0.228	0.308	0.154	0.224	0.349	1.01	0.206	0.065	1.118	0.224	126.62	20.0358	87.0098	138.873	32.1127	50.3043	226.623	208.84
CASENT0758268	ANTC43736	Myrmicinae	Temnothorax	pastinifer	w	pastinifer group	USNM	The Bahamas	Bahamas	5m	1	0.906	0.294	0.815	0.756	0.355	0.86	0.169	0.127	0.21	1.057	0.435	0.298	0.409	0.248	0.231	0.337	0.188	0.244	0	0.576	0.258	0.342	0.183	0.294	0.413	1.012	0.224	0.07	1.186	0.2325	119.841	19.6037	87.907	139.815	34.127	41.1542	225.683	217.553
CASENT0756085	ANTC43737	Myrmicinae	Temnothorax	rutabulafer_sp_nov	m	pastinifer group	USNM	Bimini	Bahamas	5m	0	0.194	0.103	0.585	0.508	0.225	0.521	0.237	0.172	0.062	0.916	n/a	0.216	0.255	0.183	0.041	0.131	0.147	0.172	0	0.458	n/a	n/a	0.126	0.129	0.305	0.766	0.07	0.042	0.7685	0.323	38.189	42.0299	97.5048	180.315	n/a	n/a	242.063	173.469
CASENT0758230 (middle)	ANTC43735	Myrmicinae	Temnothorax	rutabulafer_sp_nov	m	pastinifer group	USNM	Cienfuegos	Cuba	70m	0	0.212	0.16	0.601	0.524	0.245	0.512	0.214	0.172	0.069	0.938	n/a	0.227	0.26	0.156	0.05	0.134	0.151	0.177	0	0.446	n/a	n/a	0.122	0.146	0.322	0.83	0.082	0.039	0.78	0.3	40.458	38.4615	102.344	179.008	n/a	n/a	263.934	172.185
CASENT0756086	ANTC43737	Myrmicinae	Temnothorax	rutabulafer_sp_nov	g	pastinifer group	USNM	Bimini	Bahamas	5m	0	0.685	0.239	0.789	0.731	0.291	0.774	0.198	0.152	0.179	1.28	0.338	0.336	0.397	0.203	0.171	0.317	0.2	0.336	0	0.793	0.408	0.374	0.204	0.276	0.529	0.772	0.159	0.07	1.118	0.274	93.7073	24.5081	94.4444	175.103	55.814	26.4063	259.314	198.5
CASENT0758230 (top)	ANTC43735	Myrmicinae	Temnothorax	rutabulafer_sp_nov	g	pastinifer group	USNM	Cienfuegos	Cuba	70m	0	0.679	0.225	0.812	0.751	0.309	0.776	0.199	0.147	0.19	1.263	0.386	0.339	0.421	0.197	0.183	0.36	0.233	0.349	0	0.828	0.442	0.428	0.218	0.3	0.552	0.78	0.16	0.063	1.139	0.2725	90.4128	23.9245	96.7784	168.176	58.8549	30.5622	253.211	180.687
MCZENT00581834	ANTC43730	Myrmicinae	Temnothorax	rutabulafer_sp_nov	w	pastinifer group	MCZC	Cienfuegos	Cuba	70m	0	0.578	0.176	0.589	0.541	0.251	0.626	0.128	0.099	0.16	0.72	0.305	0.24	0.279	0.159	0.156	0.238	0.152	0.214	0	0.435	0.189	0.25	0.144	0.256	0.337	0.597	0.158	0.055	0.854	0.1775	106.839	20.7845	86.4217	133.087	34.9353	42.3611	234.028	183.553
MCZENT00581835 (bottom)	ANTC43731	Myrmicinae	Temnothorax	rutabulafer_sp_nov	w	pastinifer group	MCZC	Cienfuegos	Cuba	70m	0	0.68	0.197	0.728	0.676	0.308	0.752	0.16	0.123	0.203	0.899	0.398	0.281	0.351	0.193	0.204	0.294	0.186	0.265	0	0.558	0.26	0.408	0.164	0.367	0.427	0.718	0.185	0.062	1.052	0.2215	100.592	21.0551	89.8936	132.988	38.4615	44.2714	260.366	188.71
MCZENT00581835 (middle)	ANTC43731	Myrmicinae	Temnothorax	rutabulafer_sp_nov	w	pastinifer group	MCZC	Cienfuegos	Cuba	70m	0	0.618	0.19	0.67	0.615	0.281	0.711	0.148	0.113	0.188	0.839	0.369	0.284	0.361	0.168	0.186	0.283	0.203	0.249	0	0.535	0.245	0.322	0.163	0.312	0.409	0.668	0.174	0.062	0.9705	0.2045	100.488	21.0716	86.4979	136.423	39.8374	43.9809	250.92	177.833
MCZENT00581835 (top)	ANTC43731	Myrmicinae	Temnothorax	rutabulafer_sp_nov	w	pastinifer group	MCZC	Cienfuegos	Cuba	70m	0	0.673	0.2	0.692	0.625	0.293	0.71	0.146	0.11	0.183	0.839	0.37	0.289	0.353	0.169	0.19	0.274	0.207	0.243	0	0.531	0.239	0.342	0.167	0.335	0.408	0.7	0.184	0.058	0.98	0.201	107.68	20.5102	88.0282	134.24	38.24	44.1001	244.311	170.531
CASENT0758266 (middle)	ANTC43734	Myrmicinae	Temnothorax	rutabulafer_sp_nov	w	pastinifer group	USNM	Cienfuegos	Cuba	70m	0	0.674	0.197	0.705	0.652	0.285	0.726	0.154	0.11	0.202	0.872	0.373	0.3	0.35	0.199	0.201	0.297	0.208	0.252	0	0.533	0.243	0.36	0.172	0.344	0.419	0.691	0.168	0.054	1.015	0.209	103.374	20.5911	89.8072	133.742	37.2699	42.7752	243.605	168.269
CASENT0758266 (top)	ANTC43734	Myrmicinae	Temnothorax	rutabulafer_sp_nov	w	pastinifer group	USNM	Cienfuegos	Cuba	70m	0	0.626	0.171	0.655	0.597	0.271	0.682	0.141	0.107	0.177	0.812	0.331	0.261	0.314	0.158	0.171	0.256	0.162	0.221	0	0.485	0.225	0.34	0.149	0.312	0.353	0.64	0.168	0.056	0.938	0.1945	104.858	20.7356	87.5367	136.013	37.6884	40.7635	236.913	193.827
CASENT0758267 (top)	ANTC43733	Myrmicinae	Temnothorax	rutabulafer_sp_nov	w	pastinifer group	USNM	The Bahamas	Bahamas	5m	0	0.615	0.184	0.659	0.6	0.273	0.684	0.145	0.102	0.18	0.784	0.338	0.285	0.315	0.168	0.126	0.26	0.16	0.247	0	0.49	0.213	0.283	0.149	0.277	0.364	0.664	0.172	0.05	0.942	0.196	102.5	20.8068	87.7193	130.667	35.5	43.1122	244.295	196.875
CASENT0758270	ANTC43737	Myrmicinae	Temnothorax	rutabulafer_sp_nov	w	pastinifer group	USNM	Bimini	Bahamas	5m	0	0.688	0.242	0.692	0.643	0.294	0.73	0.147	0.111	0.18	0.857	0.374	0.277	0.357	0.183	0.183	0.284	0.2	0.225	0	0.522	0.223	0.32	0.164	0.315	0.384	0.749	0.195	0.059	1.008	0.2025	106.998	20.0893	88.0822	133.281	34.6812	43.6406	234.146	178.5
CASENT0758271	ANTC43737	Myrmicinae	Temnothorax	rutabulafer_sp_nov	w	pastinifer group	USNM	Bimini	Bahamas	5m	0	0.638	0.204	0.67	0.621	0.286	0.71	0.141	0.105	0.181	0.844	0.406	0.279	0.336	0.179	0.187	0.276	0.174	0.248	0	0.516	0.201	0.34	0.147	0.308	0.38	0.681	0.181	0.06	0.976	0.1935	102.738	19.8258	87.4648	135.91	32.3671	48.1043	258.503	193.103
CASENT0758272	ANTC43737	Myrmicinae	Temnothorax	rutabulafer_sp_nov	w	pastinifer group	USNM	Bimini	Bahamas	5m	0	0.555	0.17	0.536	0.488	0.224	0.579	0.115	0.09	0.149	0.654	0.29	0.23	0.302	0.128	0.143	0.219	0.145	0.165	0	0.402	0.152	0.233	0.115	0.223	0.292	0.563	0.152	0.052	0.7775	0.16	113.73	20.5788	84.2832	134.016	31.1475	44.3425	253.913	208.276
CASENT0758273	ANTC43737	Myrmicinae	Temnothorax	rutabulafer_sp_nov	w	pastinifer group	USNM	Bimini	Bahamas	5m	0	0.6	0.188	0.604	0.552	0.254	0.64	0.137	0.098	0.18	0.743	0.322	0.24	0.289	0.16	0.153	0.238	0.151	0.206	0	0.464	0.174	0.264	0.14	0.263	0.336	0.592	0.16	0.059	0.872	0.186	108.696	21.3303	86.25	134.601	31.5217	43.3378	240	191.391
CASENT0758288 (bottom)	ANTC43734	Myrmicinae	Temnothorax	rutabulafer_sp_nov	w	pastinifer group	USNM	Cienfuegos	Cuba	70m	0	0.655	0.189	0.679	0.623	0.278	0.702	0.137	0.108	0.2	0.84	0.354	0.288	0.321	0.169	0.179	0.275	0.201	0.234	0	0.505	0.236	0.36	0.155	0.31	0.384	0.662	0.176	0.061	0.974	0.191	105.136	19.6099	88.7464	134.831	37.8812	42.1429	247.742	159.701
CASENT0758288 (middle)	ANTC43734	Myrmicinae	Temnothorax	rutabulafer_sp_nov	w	pastinifer group	USNM	Cienfuegos	Cuba	70m	0	0.668	0.177	0.679	0.633	0.28	0.701	0.141	0.109	0.185	0.868	0.349	0.287	0.323	0.177	0.184	0.276	0.175	0.237	0	0.519	0.228	0.32	0.163	0.315	0.406	0.663	0.179	0.057	0.9835	0.1955	105.529	19.878	90.2996	137.125	36.019	40.2074	249.08	184.571
CASENT0758288 (top)	ANTC43734	Myrmicinae	Temnothorax	rutabulafer_sp_nov	w	pastinifer group	USNM	Cienfuegos	Cuba	70m	0	0.679	0.196	0.676	0.626	0.282	0.703	0.146	0.11	0.187	0.852	0.357	0.275	0.329	0.169	0.177	0.275	0.174	0.228	0	0.509	0.217	0.315	0.143	0.301	0.38	0.7	0.173	0.059	0.9775	0.201	108.466	20.5627	89.0469	136.102	34.6645	41.9014	265.734	189.08
USNMENT00532012	ANTC43762	Myrmicinae	Temnothorax	schwarzi	g	pastinifer group	USNM	Artemisa	Cuba	5m	1	0.68	0.246	0.87	0.814	0.297	0.78	0.215	0.161	0.183	1.265	0.348	0.329	0.446	0.196	0.217	0.345	0.199	0.32	0	0.782	0.379	0.456	0.2	0.328	0.509	0.731	0.18	0.07	1.204	0.2955	83.5381	24.5432	104.359	155.405	46.5602	27.5099	254.5	224.121
CASENT0619615	JTL7396	Myrmicinae	Temnothorax	bison_sp_nov	w	pergandei group	JTLC	Madriz	Nicaragua	1260m	0	0.675	0.244	0.748	0.686	0.261	0.75	0.197	0.124	0.178	0.973	0.149	0.318	0.41	0.216	0.129	0.239	0.193	0.278	0	0.513	n/a	0.2	0.176	0.281	0.314	0.719	0.15	0.059	1.061	0.259	98.3965	24.4109	91.4667	141.837	n/a	15.3135	178.409	212.435
CASENT0636947	GUAT1F15 188	Myrmicinae	Temnothorax	bison_sp_nov	w	pergandei group	JTLC	Zacapa	Guatemala	200m	0	0.535	0.194	0.602	0.548	0.229	0.651	0.158	0.114	0.156	0.821	0.119	0.242	0.332	0.2	0.105	0.191	0.169	0.246	0	0.397	n/a	0.17	0.151	0.207	0.239	0.581	0.129	0.047	0.8735	0.215	97.6277	24.6136	84.1782	149.818	n/a	14.4945	158.278	196.45
JTLC000010340	JTL6021-s	Myrmicinae	Temnothorax	bison_sp_nov	w	pergandei group	JTLC	El Progreso	Guatemala	530m	0	0.574	0.214	0.695	0.66	0.258	0.715	0.207	0.132	0.151	0.932	0.157	0.316	0.393	0.221	0.114	0.228	0.182	0.262	0	0.472	n/a	0.192	0.169	0.247	0.281	0.663	0.157	0.06	1.0175	0.273	86.9697	26.8305	92.3077	141.212	n/a	16.8455	166.272	215.934
JTLC000010341	JTL6021-s	Myrmicinae	Temnothorax	bison_sp_nov	w	pergandei group	JTLC	El Progreso	Guatemala	530m	0	0.556	0.203	0.659	0.599	0.257	0.682	0.187	0.119	0.143	0.872	0.121	0.296	0.351	0.203	0.104	0.201	0.178	0.217	0	0.437	n/a	0.163	0.169	0.211	0.251	0.605	0.14	0.05	0.94	0.2465	92.8214	26.2234	87.8299	145.576	n/a	13.8761	148.521	197.191
CASENT0636946	GUAT1F15 188	Myrmicinae	Temnothorax	bison_sp_nov	w	pergandei group	JTLC (MMPDNA#P212)	Zacapa	Guatemala	200m	0	0.557	0.171	0.615	0.569	0.231	0.655	0.167	0.116	0.143	0.816	0.135	0.297	0.311	0.196	0.094	0.175	0.16	0.227	0	0.395	n/a	0.168	0.141	0.197	0.234	0.555	0.126	0.046	0.8965	0.225	97.891	25.0976	86.8702	143.409	n/a	16.5441	165.957	194.375
MCZENT00541468	ANTC43750	Myrmicinae	Temnothorax	bison_sp_nov	w	pergandei group	MCZC	Chiapas	Mexico	560	0	0.634	0.225	0.704	0.642	0.247	0.722	0.189	0.136	0.156	0.905	0.149	0.29	0.367	0.209	0.116	0.207	0.158	0.245	0	0.45	n/a	0.211	0.146	0.239	0.268	0.704	0.139	0.048	1.003	0.257	98.7539	25.6231	88.9197	140.966	n/a	16.4641	183.562	232.278
CASENT0915984	AW2082	Myrmicinae	Temnothorax	bison_sp_nov	w	pergandei group	PSWC	El Progreso	Guatemala	400m	0	0.576	0.218	0.668	0.636	0.261	0.721	0.174	0.115	0.162	0.895	0.158	0.304	0.35	0.212	0.109	0.213	0.156	0.235	0	0.451	n/a	0.19	0.165	0.238	0.265	0.621	0.14	0.048	0.9965	0.2315	90.566	23.2313	88.2108	140.723	n/a	17.6536	160.606	224.359
CASENT0619345	JTL7396	Myrmicinae	Temnothorax	bison_sp_nov	w	pergandei group	UCDC (MMPDNA#P001)	Madriz	Nicaragua	1260m	0	0.661	0.244	0.733	0.677	0.282	0.783	0.19	0.134	0.173	0.99	0.141	0.336	0.413	0.227	0.123	0.22	0.187	0.27	0	0.488	n/a	0.195	0.172	0.282	0.305	0.732	0.15	0.055	1.0685	0.257	97.6366	24.0524	86.4623	146.233	n/a	14.2424	177.326	220.856
MCZENT00583595 (top)	SPC4993	Myrmicinae	Temnothorax	pergandei	m	pergandei group	MCZC	Arizona	United States	1255m	0	0.261	0.151	0.552	0.466	0.251	0.561	0.24	0.196	0.038	1.062	0.188	0.31	0.334	0.194	0.078	0.166	0.202	0.216	0	0.616	0.224	0.224	0.182	0.197	0.255	0.819	0.093	0.051	0.7465	0.338	56.0086	45.278	83.066	227.897	48.0687	17.7024	140.11	165.347
CASENT0758291 (top)	ANTC43744	Myrmicinae	Temnothorax	pergandei	m	pergandei group	USNM	Iowa	United States	225m	0	0.324	0.133	0.592	0.475	0.266	0.603	0.267	0.209	0.041	1.169	0.216	0.378	0.335	0.258	0.076	0.16	0.215	0.26	0	0.6	0.257	0.257	0.163	0.142	0.268	0.891	0.098	0.051	0.7765	0.3715	68.2105	47.8429	78.7728	246.105	54.1053	18.4773	164.417	155.814
MCZENT00583596 (bottom)	SPC4959	Myrmicinae	Temnothorax	pergandei	g	pergandei group	MCZC	Missouri	United States	475m	0	0.669	0.27	0.848	0.755	0.307	0.821	0.244	0.207	0.156	1.405	0.231	0.354	0.467	0.241	0.159	0.312	0.23	0.389	0	0.794	0.351	0.371	0.233	0.26	0.384	0.793	0.166	0.065	1.1655	0.3475	88.6093	29.8155	91.961	186.093	46.4901	16.4413	164.807	203.043
MCZENT00583599 (bottom)	SPC4390	Myrmicinae	Temnothorax	pergandei	g	pergandei group	MCZC	Florida	United States	40m	0	0.69	0.282	0.924	0.825	0.302	0.856	0.284	0.222	0.142	1.5	0.244	0.421	0.484	0.251	0.164	0.325	0.276	0.381	0	0.786	0.341	0.307	0.24	0.256	0.401	0.847	0.184	0.069	1.253	0.395	83.6364	31.5243	96.3785	181.818	41.3333	16.2667	167.083	175.362
MCZENT00583600 (bottom)	SPC5709	Myrmicinae	Temnothorax	pergandei	g	pergandei group	MCZC	Arizona	United States	1645m	0	0.669	0.311	0.883	0.809	0.289	0.874	0.254	0.177	0.194	1.488	0.248	0.434	0.511	0.236	0.165	0.335	0.229	0.417	0	0.808	0.393	0.372	0.277	0.307	0.447	0.848	0.175	0.07	1.246	0.3425	82.6947	27.488	92.5629	183.931	48.5785	16.6667	161.372	223.144
MCZENT00583603 (bottom)	SPC5704	Myrmicinae	Temnothorax	pergandei	g	pergandei group	MCZC	Arizona	United States	1645m	0	0.704	0.327	0.918	0.841	0.316	0.895	0.257	0.173	0.195	1.509	0.263	0.416	0.515	0.268	0.181	0.362	0.29	0.432	0	0.863	0.403	0.395	0.275	0.328	0.465	0.885	0.185	0.07	1.2885	0.3435	83.7099	26.6589	93.9665	179.429	47.9191	17.4288	169.091	177.586
CASENT0731541 (bottom)	ANTC43740	Myrmicinae	Temnothorax	pergandei	g	pergandei group	UCDC	Arizona	United States	1490m	0	0.708	0.324	0.963	0.868	0.329	0.943	0.284	0.203	0.179	1.541	0.215	0.458	0.498	0.267	0.161	0.312	0.281	0.416	0	0.829	0.36	0.338	0.265	0.301	0.433	0.896	0.184	0.065	1.3395	0.3855	81.5668	28.7794	92.0467	177.535	41.4747	13.952	163.396	177.224
CASENT0758229 (bottom)	ANTC43744	Myrmicinae	Temnothorax	pergandei	g	pergandei group	USNM	Iowa	United States	225m	0	0.66	0.3	0.918	0.835	0.339	0.903	0.271	0.209	0.177	1.528	0.237	0.45	0.51	0.319	0.137	0.311	0.291	0.439	0	0.903	0.38	0.391	0.267	0.31	0.448	0.875	0.179	0.083	1.2865	0.3755	79.0419	29.1877	92.4695	182.994	45.509	15.5105	167.79	175.258
CASENT0758292 (top)	ANTC43745	Myrmicinae	Temnothorax	pergandei	g	pergandei group	USNM	Georgia	United States	225m	0	0.633	0.294	0.86	0.785	0.307	0.851	0.266	0.184	0.163	1.409	0.203	0.352	0.453	0.212	0.135	0.293	0.24	0.37	0	0.8	0.366	0.321	0.244	0.282	0.393	0.85	0.16	0.063	1.2105	0.358	80.6369	29.5746	92.2444	179.49	46.6242	14.4074	161.066	188.75
CASENT0758293	ANTC43746	Myrmicinae	Temnothorax	pergandei	g	pergandei group	USNM	Arkansas	United States	200m	0	0.658	0.296	0.903	0.797	0.319	0.866	0.265	0.2	0.17	1.461	0.249	0.366	0.479	0.273	0.178	0.34	0.247	0.395	0	0.837	0.394	0.394	0.257	0.296	0.435	0.82	0.179	0.078	1.23	0.365	82.5596	29.6748	92.0323	183.312	49.4354	17.0431	169.261	193.927
USNMENT00529209	ANTC43748	Myrmicinae	Temnothorax	pergandei	g	pergandei group	USNM	Mississippi	United States	80m	0	0.728	0.301	0.933	0.825	0.329	0.913	0.276	0.211	0.163	1.554	0.274	0.411	0.51	0.291	0.176	0.36	0.251	0.419	0	0.896	0.405	0.439	0.266	0.313	0.451	0.855	0.178	0.085	1.2815	0.3815	88.2424	29.7698	90.3614	188.364	49.0909	17.6319	169.549	203.187
MCZENT00583595 (bottom)	SPC4993	Myrmicinae	Temnothorax	pergandei	w	pergandei group	MCZC	Arizona	United States	1255m	0	0.66	0.283	0.853	0.784	0.293	0.86	0.227	0.158	0.195	1.135	0.194	0.399	0.5	0.26	0.147	0.275	0.235	0.344	0	0.557	0.228	0.236	0.225	0.262	0.372	0.798	0.155	0.058	1.214	0.306	84.1837	25.2059	91.1628	144.77	29.0816	17.0925	165.333	212.766
MCZENT00583596 (top)	SPC4959	Myrmicinae	Temnothorax	pergandei	w	pergandei group	MCZC	Missouri	United States	475m	0	0.674	0.25	0.77	0.686	0.302	0.796	0.192	0.141	0.185	1.047	0.217	0.334	0.408	0.213	0.141	0.266	0.216	0.309	0	0.488	0.216	0.255	0.192	0.236	0.339	0.738	0.17	0.061	1.084	0.2625	98.2507	24.2159	86.1809	152.624	31.4869	20.7259	176.562	188.889
MCZENT00583598 (top)	SPC4663	Myrmicinae	Temnothorax	pergandei	w	pergandei group	MCZC	Arkansas	United States	215m	0	0.644	0.224	0.699	0.629	0.29	0.726	0.18	0.13	0.164	0.966	0.166	0.305	0.39	0.202	0.133	0.234	0.21	0.278	0	0.442	0.183	0.209	0.167	0.222	0.305	0.69	0.156	0.058	0.992	0.245	102.385	24.6976	86.6391	153.577	29.0938	17.1843	182.635	185.714
MCZENT00583599 (top)	SPC4390	Myrmicinae	Temnothorax	pergandei	w	pergandei group	MCZC	Florida	United States	40m	0	0.588	0.219	0.712	0.647	0.271	0.729	0.188	0.132	0.159	0.954	0.156	0.304	0.374	0.213	0.126	0.226	0.218	0.282	0	0.453	0.174	0.182	0.184	0.213	0.301	0.652	0.173	0.055	1.0115	0.254	90.881	25.1112	88.7517	147.45	26.8934	16.3522	163.587	171.56
MCZENT00583600 (top)	SPC5709	Myrmicinae	Temnothorax	pergandei	w	pergandei group	MCZC	Arizona	United States	1645m	0	0.627	0.255	0.748	0.691	0.279	0.789	0.19	0.125	0.178	1.086	0.168	0.334	0.448	0.252	0.156	0.254	0.227	0.312	0	0.534	0.206	0.207	0.217	0.24	0.352	0.709	0.162	0.058	1.0855	0.2525	90.7381	23.2612	87.5792	157.164	29.8119	15.4696	162.212	197.357
MCZENT00583603 (top)	SPC5704	Myrmicinae	Temnothorax	pergandei	w	pergandei group	MCZC	Arizona	United States	1645m	0	0.597	0.25	0.687	0.625	0.262	0.729	0.172	0.127	0.17	0.963	0.174	0.324	0.401	0.226	0.132	0.218	0.221	0.276	0	0.5	0.185	0.173	0.2	0.226	0.312	0.672	0.149	0.053	0.9895	0.2355	95.52	23.7999	85.7339	154.08	29.6	18.0685	156	181.448
CASENT0758261	ANTC43042	Myrmicinae	Temnothorax	pergandei	w	pergandei group	MMPC	North Carolina	United States	150m	0	0.631	0.234	0.708	0.634	0.273	0.727	0.184	0.129	0.16	0.971	0.194	0.317	0.382	0.204	0.128	0.233	0.231	0.292	0	0.45	0.199	0.232	0.179	0.22	0.307	0.677	0.16	0.058	0.9975	0.2485	99.5268	24.9123	87.2077	153.155	31.388	19.9794	171.508	165.368
CASENT0758356 (top)	PSW7197-2	Myrmicinae	Temnothorax	pergandei	w	pergandei group	PSWC	Texas	United States	5m	0	0.586	0.248	0.72	0.665	0.277	0.766	0.209	0.136	0.172	1.001	0.182	0.304	0.429	0.235	0.128	0.238	0.232	0.295	0	0.464	0.207	0.248	0.211	0.245	0.351	0.656	0.166	0.057	1.048	0.277	88.1203	26.4313	86.8146	150.526	31.1278	18.1818	166.351	184.914
CASENT0915983 (top)	PSW3785-6	Myrmicinae	Temnothorax	pergandei	w	pergandei group	PSWC	Texas	United States	1540m	0	0.64	0.253	0.721	0.66	0.296	0.765	0.189	0.137	0.168	0.985	0.142	0.334	0.389	0.23	0.112	0.203	0.192	0.259	0	0.474	0.183	0.189	0.174	0.218	0.296	0.71	0.154	0.055	1.0425	0.2575	96.9697	24.7002	86.2745	149.242	27.7273	14.4162	170.115	202.604
CASENT0731541 (top)	ANTC43740	Myrmicinae	Temnothorax	pergandei	w	pergandei group	UCDC	Arizona	United States	1490m	0	0.641	0.263	0.757	0.692	0.3	0.84	0.2	0.145	0.184	1.037	0.179	0.334	0.433	0.243	0.141	0.245	0.253	0.334	0	0.48	0.18	0.19	0.201	0.227	0.345	0.72	0.153	0.059	1.112	0.2725	92.6301	24.5054	82.381	149.855	26.0116	17.2613	171.642	171.146
CASENT0758308 (top)	ANTC43741	Myrmicinae	Temnothorax	pergandei	w	pergandei group	UCDC	Illinois	United States	215m	0	0.62	0.248	0.703	0.641	0.264	0.726	0.186	0.126	0.161	0.985	0.193	0.305	0.402	0.239	0.115	0.214	0.213	0.281	0	0.413	0.182	0.222	0.195	0.222	0.314	0.679	0.148	0.054	1.004	0.249	96.7239	24.8008	88.292	153.666	28.3931	19.5939	161.026	188.732
CASENT0758313	ANTC43743	Myrmicinae	Temnothorax	pergandei	w	pergandei group	UCDC	New Mexico	United States	1234m	0	0.543	0.213	0.643	0.597	0.263	0.701	0.165	0.121	0.156	0.847	0.109	0.278	0.346	0.197	0.099	0.187	0.171	0.24	0	0.415	0.118	0.134	0.158	0.178	0.257	0.609	0.137	0.051	0.9475	0.2255	90.9548	23.7995	85.1641	141.876	19.7655	12.8689	162.658	202.339
CASENT0758291 (bottom)	ANTC43744	Myrmicinae	Temnothorax	pergandei	w	pergandei group	USNM	Iowa	United States	225m	0	0.636	0.271	0.77	0.695	0.286	0.801	0.205	0.137	0.18	1.044	0.187	0.345	0.426	0.272	0.111	0.224	0.255	0.31	0	0.499	0.206	0.264	0.202	0.239	0.34	0.73	0.153	0.062	1.0955	0.2735	91.5108	24.9658	86.7665	150.216	29.6403	17.9119	168.317	167.059
CASENT0758292 (middle)	ANTC43745	Myrmicinae	Temnothorax	pergandei	w	pergandei group	USNM	Georgia	United States	225m	0	0.624	0.264	0.718	0.673	0.294	0.759	0.185	0.119	0.162	1.023	0.146	0.347	0.397	0.235	0.114	0.223	0.235	0.297	0	0.462	0.218	0.245	0.192	0.243	0.33	0.707	0.16	0.063	1.0525	0.2445	92.7192	23.2304	88.6693	152.006	32.3923	14.2717	171.875	168.936
CASENT0758293	ANTC43746	Myrmicinae	Temnothorax	pergandei	w	pergandei group	USNM	Arkansas	United States	200m	0	0.674	0.239	0.721	0.65	0.285	0.749	0.178	0.13	0.184	0.98	0.206	0.311	0.38	0.195	0.135	0.252	0.219	0.285	0	0.455	0.191	0.232	0.179	0.218	0.322	0.709	0.163	0.061	1.0245	0.243	103.692	23.7189	86.7824	150.769	29.3846	21.0204	179.888	173.516
USNMENT00529210 (top)	ANTC43748	Myrmicinae	Temnothorax	pergandei	w	pergandei group	USNM	Mississippi	United States	80m	0	0.687	0.24	0.762	0.682	0.307	0.809	0.191	0.144	0.199	1.073	0.222	0.338	0.407	0.235	0.142	0.262	0.23	0.304	0	0.496	0.225	0.264	0.197	0.233	0.346	0.757	0.186	0.068	1.0865	0.263	100.733	24.2062	84.3016	157.331	32.9912	20.6897	175.635	176.957
USNMENT00921851 (bottom)	ANTC43748	Myrmicinae	Temnothorax	pergandei	w	pergandei group	USNM	Mississippi	United States	80m	0	0.708	0.254	0.759	0.682	0.305	0.804	0.19	0.139	0.181	1.065	0.209	0.335	0.413	0.227	0.148	0.263	0.219	0.312	0	0.488	0.22	0.255	0.194	0.247	0.337	0.741	0.18	0.065	1.084	0.2595	103.812	23.9391	84.8259	156.158	32.2581	19.6244	173.711	188.584
USNMENT00921856	ANTC43749	Myrmicinae	Temnothorax	pergandei	w	pergandei group	USNM	Florida	United States	5m	0	0.604	0.237	0.699	0.62	0.27	0.724	0.177	0.126	0.174	0.947	0.173	0.307	0.363	0.22	0.129	0.241	0.205	0.302	0	0.457	0.195	0.217	0.184	0.229	0.301	0.678	0.173	0.064	0.982	0.24	97.4194	24.4399	85.6354	152.742	31.4516	18.2682	163.587	177.073
USNMENT00922508	ANTC43747	Myrmicinae	Temnothorax	pergandei	w	pergandei group	USNM	DC	United States	40m	0	0.643	0.27	0.718	0.677	0.287	0.779	0.192	0.122	0.171	1.015	0.176	0.321	0.404	0.233	0.117	0.222	0.254	0.313	0	0.483	0.199	0.237	0.197	0.243	0.331	0.738	0.155	0.062	1.0665	0.253	94.9778	23.7225	86.9063	149.926	29.3944	17.3399	168.02	159.055
USNMENT00532783	ANTC43747	Myrmicinae	Temnothorax	pergandei	w	pergandei group	USNM (lectotype)	DC	United States	40m	0	0.586	0.249	0.654	0.625	0.277	0.744	0.185	0.106	0.141	0.933	0.152	0.33	0.377	0.197	0.112	0.207	0.243	0.247	0	0.44	0.166	0.204	0.167	0.206	0.288	0.687	0.141	0.059	0.997	0.238	93.76	23.8716	84.0054	149.28	26.56	16.2915	172.455	155.144
CASENT0756192 (bottom)	RA53	Myrmicinae	Temnothorax	pilicornis_sp_nov	w	pilicornis group	UCDC	Baja California Sur	Mexico	10m	0	0.471	0.177	0.548	0.493	0.231	0.634	0.164	0.122	0.111	0.729	0.195	0.235	0.266	0.143	0.097	0.216	0.193	0.21	0	0.344	0.145	0.193	0.157	0.157	0.325	0.495	0.139	0.049	0.81	0.225	95.5375	27.7778	77.7603	147.87	29.4118	26.749	207.006	137.824
CASENT0756192 (top)	RA53	Myrmicinae	Temnothorax	pilicornis_sp_nov	w	pilicornis group	UCDC	Baja California Sur	Mexico	10m	0	0.44	0.17	0.548	0.497	0.235	0.625	0.154	0.118	0.142	0.734	0.213	0.209	0.281	0.15	0.107	0.224	0.188	0.212	0	0.344	0.156	0.205	0.15	0.15	0.326	0.495	0.14	0.045	0.8095	0.213	88.5312	26.3125	79.52	147.686	31.3883	29.0191	217.333	149.468
CASENT0756194 (bottom)	AMB242	Myrmicinae	Temnothorax	pilicornis_sp_nov	w	pilicornis group	UCDC	Baja California Sur	Mexico	10m	0	0.49	0.188	0.602	0.549	0.245	0.689	0.17	0.129	0.157	0.817	0.219	0.255	0.317	0.182	0.104	0.242	0.213	0.241	0	0.396	0.187	0.245	0.183	0.183	0.39	0.542	0.142	0.044	0.8935	0.2345	89.2532	26.2451	79.6807	148.816	34.0619	26.8054	213.115	148.826
CASENT0756194 (middle)	AMB242	Myrmicinae	Temnothorax	pilicornis_sp_nov	w	pilicornis group	UCDC	Baja California Sur	Mexico	10m	0	0.423	0.156	0.517	0.469	0.222	0.606	0.149	0.119	0.135	0.702	0.192	0.223	0.271	0.166	0.096	0.202	0.209	0.198	0	0.35	0.142	0.192	0.144	0.144	0.314	0.451	0.126	0.042	0.772	0.2085	90.1919	27.0078	77.3927	149.68	30.2772	27.3504	218.056	129.665
CASENT0756194 (top)	AMB242	Myrmicinae	Temnothorax	pilicornis_sp_nov	w	pilicornis group	UCDC	Baja California Sur	Mexico	10m	0	0.476	0.175	0.588	0.531	0.244	0.666	0.167	0.139	0.145	0.792	0.212	0.242	0.319	0.177	0.122	0.237	0.19	0.201	0	0.385	0.179	0.23	0.172	0.182	0.384	0.521	0.138	0.049	0.864	0.2365	89.6422	27.3727	79.7297	149.153	33.71	26.7677	223.256	167.895
MCZENT00510541	DL03474	Myrmicinae	Temnothorax	agavicola_sp_nov	g	pulchellus group	MCZC	Pedernales	Dominican Republic	92	0	0.573	0.229	0.746	0.708	0.295	0.728	0.208	0.173	0.16	1.196	0.308	0.313	0.405	0.185	0.146	0.279	0.234	0.319	0	0.72	0.324	0.32	0.197	0.234	0.55	0.651	0.15	0.059	1.072	0.2945	80.9322	27.472	97.2527	168.927	45.7627	25.7525	279.188	173.077
MCZENT00510560	DL03479:001	Myrmicinae	Temnothorax	agavicola_sp_nov	g	pulchellus group	MCZC	Pedernales	Dominican Republic	92	0	0.567	0.249	0.764	0.703	0.307	0.74	0.223	0.188	0.166	1.157	0.283	0.285	0.413	0.169	0.152	0.302	0.227	0.341	0	0.703	0.314	0.32	0.192	0.228	0.541	0.631	0.148	0.058	1.073	0.317	80.6543	29.5433	95	164.58	44.6657	24.4598	281.771	181.938
MCZENT00510559	DL03475:001	Myrmicinae	Temnothorax	agavicola_sp_nov	w	pulchellus group	MCZC	Pedernales	Dominican Republic	92	0	0.484	0.188	0.549	0.503	0.261	0.614	0.121	0.098	0.141	0.685	0.219	0.214	0.289	0.153	0.104	0.191	0.193	0.239	0	0.362	0.156	0.202	0.139	0.135	0.373	0.474	0.135	0.045	0.81	0.17	96.2227	20.9877	81.9218	136.183	31.0139	31.9708	268.345	149.741
MCZENT00510562 (bottom)	DL03479:003	Myrmicinae	Temnothorax	agavicola_sp_nov	w	pulchellus group	MCZC	Pedernales	Dominican Republic	92	0	0.477	0.182	0.556	0.519	0.262	0.623	0.123	0.1	0.136	0.689	0.211	0.219	0.282	0.175	0.103	0.189	0.229	0.247	0	0.364	0.152	0.176	0.137	0.13	0.358	0.466	0.118	0.05	0.8305	0.173	91.9075	20.8308	83.3066	132.755	29.2871	30.6241	261.314	123.144
MCZENT00510562 (top)	DL03479:003	Myrmicinae	Temnothorax	agavicola_sp_nov	w	pulchellus group	MCZC	Pedernales	Dominican Republic	92	0	0.492	0.177	0.539	0.498	0.267	0.617	0.134	0.103	0.141	0.685	0.228	0.226	0.288	0.185	0.103	0.192	0.198	0.255	0	0.363	0.148	0.2	0.14	0.129	0.392	0.517	0.136	0.051	0.8065	0.1855	98.7952	23.0006	80.7131	137.55	29.7189	33.2847	280	145.455
CASENT0758360	ANTC43703	Myrmicinae	Temnothorax	agavicola_sp_nov	w	pulchellus group	USNM	Barahona	Dominican Republic	120m	0	0.474	0.169	0.516	0.478	0.248	0.593	0.124	0.105	0.15	0.663	0.257	0.221	0.271	0.179	0.099	0.192	0.225	0.251	0	0.343	0.144	0.182	0.127	0.117	0.375	0.444	0.132	0.05	0.7745	0.1765	99.1632	22.7889	80.6071	138.703	30.1255	38.7632	295.276	120.444
MCZENT00510561 (top)	DL03479:002	Myrmicinae	Temnothorax	agavicola_sp_nov	w	pulchellus group	MCZC	Pedernales	Dominican Republic	92	0	0.482	0.17	0.542	0.489	0.261	0.614	0.13	0.093	0.147	0.675	0.211	0.222	0.271	0.175	0.105	0.194	0.189	0.249	0	0.356	0.137	0.185	0.132	0.127	0.361	0.49	0.136	0.051	0.796	0.1765	98.5685	22.1734	79.6417	138.037	28.0164	31.2593	273.485	143.386
MCZENT00510561 (bottom)	DL03479:002	Myrmicinae	Temnothorax	agavicola_sp_nov	w	pulchellus group	MCZC	Pedernales	Dominican Republic	92	0	0.49	0.176	0.54	0.5	0.252	0.62	0.135	0.101	0.153	0.677	0.208	0.219	0.277	0.189	0.099	0.197	0.205	0.249	0	0.363	0.154	0.197	0.13	0.121	0.38	0.468	0.135	0.052	0.81	0.1855	98	22.9012	80.6452	135.4	30.8	30.7238	292.308	135.122
CASENT0756096	JKW-2010-154	Myrmicinae	Temnothorax	agavicola_sp_nov	w	pulchellus group	MMPC	Providenciales	Turks and Caicos Islands	5m	0	0.477	0.187	0.567	0.527	0.265	0.646	0.14	0.102	0.153	0.742	0.211	0.23	0.305	0.185	0.107	0.196	0.204	0.253	0	0.388	0.161	0.204	0.146	0.149	0.364	0.5	0.159	0.044	0.85	0.191	90.5123	22.4706	81.5789	140.797	30.5503	28.4367	249.315	149.51
CASENT0758819	JKW-2010-154	Myrmicinae	Temnothorax	agavicola_sp_nov	w	pulchellus group	MMPC	Providenciales	Turks and Caicos Islands	5m	0	0.5	0.199	0.588	0.544	0.262	0.653	0.145	0.105	0.153	0.75	0.218	0.232	0.267	0.204	0.118	0.214	0.226	0.25	0	0.402	0.169	0.22	0.146	0.148	0.383	0.515	0.162	0.053	0.8705	0.1975	91.9118	22.6881	83.3078	137.868	31.0662	29.0667	262.329	118.142
CASENT0758672	JKW-2010-154	Myrmicinae	Temnothorax	agavicola_sp_nov	w	pulchellus group	UCDC	Providenciales	Turks and Caicos Islands	5m	0	0.495	0.191	0.572	0.525	0.263	0.655	0.14	0.105	0.159	0.731	0.217	0.234	0.277	0.178	0.111	0.202	0.205	0.24	0	0.396	0.164	0.201	0.139	0.138	0.37	0.543	0.16	0.05	0.8525	0.1925	94.2857	22.5806	80.1527	139.238	31.2381	29.6854	266.187	135.122
CASENT0756098	ANTC43063	Myrmicinae	Temnothorax	albispinus	m	pulchellus group	MMPC	Puerto Rico	United States	30m	0	0.312	0.137	0.504	0.453	0.2	0.479	0.209	0.172	0.057	0.698	n/a	0.141	0.295	0.191	0.056	0.127	0.154	0.158	0	0.451	n/a	n/a	0.115	0.129	0.262	0.523	0.069	0.039	0.6925	0.295	68.8742	42.5993	94.572	154.084	n/a	n/a	227.826	191.558
LACMENT323175 (bottom)	ANTC43062	Myrmicinae	Temnothorax	albispinus	g	pulchellus group	LACM	Puerto Rico	United States	60m	0	0.59	0.254	0.786	0.735	0.312	0.763	0.213	0.163	0.149	1.181	0.328	0.304	0.462	0.265	0.176	0.31	0.244	0.336	0	0.762	0.355	0.345	0.195	0.195	0.553	0.674	0.138	0.054	1.1165	0.2945	80.2721	26.3771	96.3303	160.68	48.2993	27.7731	283.59	189.344
MCZENT00505431	JKW-2007-282	Myrmicinae	Temnothorax	albispinus	g	pulchellus group	MCZC	Puerto Rico	United States	30	0	0.561	0.224	0.776	0.715	0.278	0.716	0.21	0.166	0.154	1.153	0.282	0.324	0.384	0.212	0.131	0.256	0.21	0.316	0	0.715	0.354	0.293	0.182	0.189	0.492	0.629	0.122	0.051	1.073	0.293	78.4615	27.3066	99.8603	161.259	49.5105	24.4579	270.33	182.857
LACMENT323171 (bottom)	JAT516	Myrmicinae	Temnothorax	albispinus	w	pulchellus group	LACM	Puerto Rico	United States	70m	0	0.511	0.192	0.598	0.532	0.265	0.648	0.142	0.109	0.142	0.715	0.276	0.226	0.333	0.192	0.136	0.229	0.213	0.255	0	0.408	0.173	0.259	0.151	0.163	0.391	0.513	0.147	0.046	0.856	0.1965	96.0526	22.9556	82.0988	134.398	32.5188	38.6014	258.94	156.338
LACMENT323171 (middle)	JAT516	Myrmicinae	Temnothorax	albispinus	w	pulchellus group	LACM	Puerto Rico	United States	70m	0	0.475	0.19	0.554	0.509	0.255	0.62	0.133	0.104	0.137	0.679	0.245	0.206	0.302	0.185	0.117	0.214	0.216	0.233	0	0.375	0.158	0.23	0.142	0.138	0.374	0.497	0.14	0.047	0.819	0.185	93.3202	22.5885	82.0968	133.399	31.0413	36.0825	263.38	139.815
LACMENT323171 (top)	JAT516	Myrmicinae	Temnothorax	albispinus	w	pulchellus group	LACM	Puerto Rico	United States	70m	0	0.478	0.196	0.585	0.535	0.256	0.638	0.139	0.104	0.144	0.706	0.257	0.237	0.322	0.204	0.126	0.228	0.186	0.25	0	0.415	0.17	0.237	0.151	0.159	0.396	0.522	0.143	0.046	0.854	0.191	89.3458	22.3653	83.8558	131.963	31.7757	36.4023	262.252	173.118
LACMENT323172 (bottom)	JAT109	Myrmicinae	Temnothorax	albispinus	w	pulchellus group	LACM	Puerto Rico	United States	5	0	0.479	0.2	0.58	0.519	0.271	0.636	0.138	0.1	0.15	0.693	0.255	0.213	0.318	0.191	0.122	0.216	0.193	0.24	0	0.396	0.144	0.224	0.15	0.15	0.388	0.5	0.133	0.046	0.837	0.188	92.2929	22.4612	81.6038	133.526	27.7457	36.7965	258.667	164.767
LACMENT323172 (middle)	JAT109	Myrmicinae	Temnothorax	albispinus	w	pulchellus group	LACM	Puerto Rico	United States	5	0	0.481	0.192	0.563	0.504	0.267	0.628	0.135	0.094	0.153	0.686	0.266	0.221	0.315	0.19	0.128	0.221	0.231	0.253	0	0.384	0.15	0.242	0.152	0.152	0.407	0.504	0.142	0.048	0.818	0.182	95.4365	22.2494	80.2548	136.111	29.7619	38.7755	267.763	136.364
LACMENT323172 (top)	JAT109	Myrmicinae	Temnothorax	albispinus	w	pulchellus group	LACM	Puerto Rico	United States	5	0	0.468	0.194	0.565	0.507	0.273	0.63	0.134	0.104	0.148	0.665	0.25	0.212	0.289	0.172	0.099	0.197	0.197	0.216	0	0.366	0.142	0.219	0.135	0.133	0.366	0.481	0.132	0.049	0.822	0.186	92.3077	22.6277	80.4762	131.164	28.0079	37.594	271.111	146.701
LACMENT323173	JAT252	Myrmicinae	Temnothorax	albispinus	w	pulchellus group	LACM	Puerto Rico	United States	5m	0	0.488	0.19	0.603	0.542	0.263	0.644	0.141	0.103	0.154	0.699	0.256	0.221	0.318	0.2	0.112	0.215	0.199	0.239	0	0.4	0.159	0.247	0.146	0.146	0.38	0.504	0.145	0.051	0.864	0.1925	90.0369	22.2801	84.1615	128.967	29.3358	36.6237	260.274	159.799
LACMENT323174 (bottom)	JAT51	Myrmicinae	Temnothorax	albispinus	w	pulchellus group	LACM	Puerto Rico	United States	30	0	0.483	0.19	0.582	0.538	0.277	0.663	0.145	0.1	0.151	0.698	0.232	0.213	0.323	0.189	0.119	0.217	0.208	0.249	0	0.395	0.169	0.227	0.147	0.147	0.382	0.505	0.136	0.047	0.8695	0.195	89.777	22.4267	81.1463	129.74	31.4126	33.2378	259.864	155.288
LACMENT323174 (middle)	JAT51	Myrmicinae	Temnothorax	albispinus	w	pulchellus group	LACM	Puerto Rico	United States	30	0	0.493	0.191	0.578	0.527	0.268	0.636	0.136	0.097	0.153	0.7	0.25	0.218	0.33	0.186	0.125	0.201	0.227	0.233	0	0.387	0.156	0.22	0.142	0.155	0.375	0.508	0.142	0.049	0.845	0.1845	93.5484	21.8343	82.8616	132.827	29.6015	35.7143	264.085	145.374
LACMENT323174 (top)	JAT51	Myrmicinae	Temnothorax	albispinus	w	pulchellus group	LACM	Puerto Rico	United States	30	0	0.444	0.167	0.522	0.466	0.233	0.571	0.125	0.101	0.142	0.608	0.19	0.184	0.281	0.173	0.095	0.172	0.172	0.211	0	0.335	0.125	0.172	0.119	0.119	0.334	0.44	0.12	0.044	0.7515	0.1755	95.279	23.3533	81.6112	130.472	26.824	31.25	280.672	163.372
LACMENT323175 (top)	ANTC43062	Myrmicinae	Temnothorax	albispinus	w	pulchellus group	LACM	Puerto Rico	United States	60m	0	0.486	0.188	0.562	0.513	0.27	0.647	0.148	0.112	0.15	0.674	0.253	0.233	0.31	0.188	0.112	0.202	0.196	0.239	0	0.388	0.147	0.238	0.143	0.143	0.377	0.533	0.132	0.049	0.8365	0.204	94.7368	24.3873	79.289	131.384	28.655	37.5371	263.636	158.163
CASENT0758358 (bottom)	ANTC43064	Myrmicinae	Temnothorax	albispinus	w	pulchellus group	USNM	Puerto Rico	United States	30	0	0.432	0.176	0.518	0.456	0.237	0.563	0.12	0.097	0.12	0.61	0.222	0.213	0.273	0.161	0.102	0.189	0.195	0.209	0	0.332	0.131	0.173	0.125	0.116	0.335	0.458	0.145	0.051	0.7375	0.1685	94.7368	22.8475	80.9947	133.772	28.7281	36.3934	268	140
CASENT0758358 (middle)	ANTC43064	Myrmicinae	Temnothorax	albispinus	w	pulchellus group	USNM	Puerto Rico	United States	30	0	0.479	0.205	0.56	0.514	0.25	0.611	0.139	0.097	0.145	0.664	0.216	0.223	0.331	0.186	0.113	0.191	0.207	0.237	0	0.383	0.128	0.175	0.134	0.12	0.369	0.431	0.143	0.05	0.8195	0.1875	93.1907	22.8798	84.1244	129.183	24.9027	32.5301	275.373	159.903
CASENT0758358 (top)	ANTC43064	Myrmicinae	Temnothorax	albispinus	w	pulchellus group	USNM	Puerto Rico	United States	30	0	0.492	0.187	0.564	0.52	0.234	0.607	0.142	0.102	0.139	0.679	0.242	0.227	0.304	0.187	0.11	0.215	0.171	0.226	0	0.389	0.141	0.179	0.143	0.121	0.378	0.466	0.147	0.053	0.8235	0.193	94.6154	23.4366	85.6672	130.577	27.1154	35.6406	264.336	177.778
CASENT0758359	ANTC43065	Myrmicinae	Temnothorax	albispinus	w	pulchellus group	USNM	Puerto Rico	United States	30	0	0.481	0.203	0.597	0.562	0.265	0.648	0.149	0.106	0.156	0.693	0.266	0.208	0.319	0.185	0.117	0.217	0.2	0.237	0	0.416	0.169	0.22	0.149	0.136	0.385	0.494	0.157	0.053	0.886	0.202	85.5872	22.7991	86.7284	123.31	30.0712	38.3838	258.389	159.5
LACMENT323241	ANTC43813	Myrmicinae	Temnothorax	albispinus	m	pulchellus group	LACM	Puerto Rico	United States	60	0	0.324	0.147	0.534	0.483	0.202	0.502	0.217	0.18	0.069	0.765	n/a	0.154	0.347	0.203	0.045	0.12	0.163	0.191	0	0.452	n/a	n/a	0.119	0.142	0.33	0.594	0.073	0.036	0.734	0.307	67.0807	41.8256	96.2151	158.385	n/a	n/a	277.311	212.883
LACMENT323242	ANTC43813	Myrmicinae	Temnothorax	albispinus	m	pulchellus group	LACM	Puerto Rico	United States	60	0	0.338	0.177	0.574	0.494	0.19	0.516	0.228	0.174	0.069	0.753	n/a	0.172	0.349	0.217	0.058	0.15	0.186	0.176	0	0.519	n/a	n/a	0.13	0.155	0.339	0.649	0.084	0.039	0.752	0.315	68.4211	41.8883	95.7364	152.429	n/a	n/a	260.769	187.634
LACMENT323246	ANTC43816	Myrmicinae	Temnothorax	albispinus	m	pulchellus group	LACM	Puerto Rico	United States	60	0	0.314	0.148	0.523	0.449	0.192	0.497	0.212	0.182	0.056	0.73	n/a	0.157	0.296	0.202	0.042	0.122	0.193	0.198	0	0.445	n/a	n/a	0.124	0.123	0.321	0.555	0.084	0.038	0.6975	0.303	69.9332	43.4409	90.3421	162.584	n/a	n/a	258.871	153.368
LACMENT323244 (bottom)	ANTC43814	Myrmicinae	Temnothorax	albispinus	g	pulchellus group	LACM	Puerto Rico	United States	50m	0	0.613	0.252	0.78	0.716	0.315	0.775	0.22	0.185	0.15	1.228	0.286	0.312	0.441	0.242	0.157	0.294	0.297	0.333	0	0.77	0.37	0.331	0.206	0.212	0.535	0.645	0.151	0.06	1.1035	0.3125	85.6145	28.319	92.3871	171.508	51.676	23.2899	259.709	148.485
LACMENT323245 (bottom)	ANTC43815	Myrmicinae	Temnothorax	albispinus	g	pulchellus group	LACM	Puerto Rico	United States	60	0	0.599	0.243	0.807	0.758	0.3	0.768	0.224	0.16	0.146	1.262	0.311	0.342	0.466	0.258	0.171	0.293	0.251	0.359	0	0.779	0.374	0.34	0.199	0.209	0.552	0.67	0.143	0.061	1.142	0.304	79.0237	26.62	98.6979	166.491	49.3404	24.6434	277.387	185.657
LACMENT002311 (bottom)	JTL3493-s	Myrmicinae	Temnothorax	albispinus	w	pulchellus group	JTLC	Puerto Rico	United States	50m	0	0.489	0.186	0.569	0.517	0.278	0.648	0.139	0.104	0.157	0.692	0.246	0.222	0.332	0.213	0.121	0.21	0.209	0.258	0	0.377	0.15	0.222	0.148	0.154	0.405	0.479	0.135	0.055	0.841	0.191	94.5841	22.7111	79.784	133.849	29.0135	35.5491	273.649	158.852
LACMENT002311 (top)	JTL3493-s	Myrmicinae	Temnothorax	albispinus	w	pulchellus group	JTLC	Puerto Rico	United States	50m	0	0.474	0.179	0.564	0.517	0.268	0.634	0.141	0.105	0.134	0.675	0.241	0.212	0.319	0.197	0.124	0.214	0.208	0.252	0	0.37	0.153	0.211	0.143	0.149	0.374	0.481	0.136	0.051	0.834	0.1935	91.6828	23.2014	81.5457	130.561	29.5938	35.7037	261.538	153.365
LACMENT002310	JTL3493-s	Myrmicinae	Temnothorax	albispinus	w	pulchellus group	LACM	Puerto Rico	United States	50m	0	0.529	0.205	0.619	0.566	0.276	0.681	0.156	0.111	0.144	0.763	0.255	0.237	0.345	0.231	0.147	0.235	0.235	0.284	0	0.413	0.18	0.249	0.169	0.176	0.426	0.523	0.149	0.047	0.9065	0.2115	93.4629	23.3315	83.1131	134.806	31.8021	33.4207	252.071	146.809
LACMENT323243	RRS98-239	Myrmicinae	Temnothorax	albispinus	w	pulchellus group	LACM	Puerto Rico	United States	120	0	0.53	0.186	0.605	0.551	0.269	0.673	0.143	0.111	0.142	0.733	0.272	0.224	0.346	0.207	0.134	0.238	0.208	0.281	0	0.395	0.167	0.235	0.164	0.163	0.415	0.493	0.139	0.052	0.8875	0.1985	96.1887	22.3662	81.8722	133.031	30.3085	37.1078	253.049	166.346
LACMENT323243	RRS98-239	Myrmicinae	Temnothorax	albispinus	w	pulchellus group	LACM	Puerto Rico	United States	120	0	0.47	0.168	0.547	0.489	0.261	0.606	0.127	0.091	0.149	0.632	0.2	0.212	0.259	0.201	0.093	0.207	0.214	0.248	0	0.344	0.138	0.171	0.141	0.155	0.348	0.441	0.126	0.044	0.792	0.1725	96.1145	21.7803	80.6931	129.243	28.2209	31.6456	246.809	121.028
LACMENT323244 (middle)	ANTC43814	Myrmicinae	Temnothorax	albispinus	w	pulchellus group	LACM	Puerto Rico	United States	50m	0	0.53	0.216	0.641	0.59	0.292	0.694	0.151	0.106	0.179	0.756	0.257	0.239	0.35	0.209	0.14	0.235	0.24	0.263	0	0.415	0.163	0.235	0.161	0.169	0.434	0.534	0.152	0.052	0.937	0.204	89.8305	21.7716	85.0144	128.136	27.6271	33.9947	269.565	145.833
LACMENT323244 (top)	ANTC43814	Myrmicinae	Temnothorax	albispinus	w	pulchellus group	LACM	Puerto Rico	United States	50m	0	0.503	0.197	0.607	0.557	0.274	0.667	0.141	0.109	0.161	0.734	0.258	0.239	0.339	0.192	0.127	0.228	0.211	0.257	0	0.414	0.161	0.251	0.161	0.158	0.418	0.515	0.148	0.054	0.8905	0.1955	90.3052	21.954	83.5082	131.777	28.9048	35.1499	259.627	160.664
LACMENT323245 (middle)	ANTC43815	Myrmicinae	Temnothorax	albispinus	w	pulchellus group	LACM	Puerto Rico	United States	60	0	0.506	0.196	0.612	0.56	0.267	0.663	0.152	0.102	0.156	0.736	0.264	0.241	0.336	0.215	0.13	0.228	0.223	0.297	0	0.411	0.175	0.226	0.158	0.168	0.422	0.511	0.14	0.052	0.8915	0.203	90.3571	22.7706	84.4646	131.429	31.25	35.8696	267.089	150.673
LACMENT323245 (top)	ANTC43815	Myrmicinae	Temnothorax	albispinus	w	pulchellus group	LACM	Puerto Rico	United States	60	0	0.523	0.193	0.608	0.549	0.294	0.672	0.137	0.116	0.139	0.758	0.261	0.25	0.336	0.227	0.134	0.228	0.211	0.252	0	0.406	0.166	0.241	0.144	0.154	0.397	0.529	0.154	0.056	0.885	0.195	95.2641	22.0339	81.6964	138.069	30.2368	34.4327	275.694	159.242
LACMENT323247 (bottom)	ANTC43817	Myrmicinae	Temnothorax	albispinus	w	pulchellus group	LACM	Puerto Rico	United States	60	0	0.45	0.168	0.54	0.483	0.257	0.594	0.129	0.093	0.14	0.64	0.219	0.219	0.292	0.182	0.11	0.196	0.215	0.231	0	0.348	0.133	0.181	0.129	0.151	0.359	0.45	0.132	0.044	0.78	0.1755	93.1677	22.5	81.3131	132.505	27.5362	34.2188	278.295	135.814
LACMENT323247 (second from bottom)	ANTC43817	Myrmicinae	Temnothorax	albispinus	w	pulchellus group	LACM	Puerto Rico	United States	60	0	0.492	0.188	0.586	0.534	0.273	0.651	0.142	0.098	0.147	0.701	0.245	0.234	0.318	0.202	0.127	0.229	0.208	0.248	0	0.384	0.152	0.216	0.144	0.153	0.386	0.513	0.14	0.049	0.8595	0.191	92.1348	22.2222	82.0276	131.273	28.4644	34.9501	268.056	152.885
LACMENT323247 (second from top)	ANTC43817	Myrmicinae	Temnothorax	albispinus	w	pulchellus group	LACM	Puerto Rico	United States	60	0	0.499	0.192	0.569	0.512	0.265	0.631	0.132	0.094	0.138	0.672	0.238	0.243	0.311	0.2	0.111	0.212	0.21	0.254	0	0.371	0.156	0.2	0.142	0.154	0.383	0.464	0.132	0.053	0.8275	0.179	97.4609	21.6314	81.141	131.25	30.4688	35.4167	269.718	148.095
LACMENT323247 (top)	ANTC43817	Myrmicinae	Temnothorax	albispinus	w	pulchellus group	LACM	Puerto Rico	United States	60	0	0.482	0.195	0.579	0.532	0.261	0.64	0.149	0.113	0.148	0.676	0.24	0.234	0.32	0.204	0.126	0.219	0.214	0.23	0	0.378	0.156	0.206	0.144	0.148	0.378	0.486	0.148	0.058	0.852	0.2055	90.6015	24.1197	83.125	127.068	29.3233	35.503	262.5	149.533
MCZENT00521421	DL03803	Myrmicinae	Temnothorax	bahoruco_sp_nov	g	pulchellus group	MCZC	Pedernales	Dominican Republic	2025m	0	0.57	0.27	0.794	0.736	0.288	0.746	0.244	0.188	0.147	1.304	0.296	0.296	0.416	0.2	0.167	0.315	0.222	0.391	0	0.807	0.354	0.356	0.251	0.233	0.528	0.673	0.129	0.053	1.109	0.338	77.4457	30.4779	98.6595	177.174	48.0978	22.6994	210.359	187.387
CASENT0758678	DL03802	Myrmicinae	Temnothorax	bahoruco_sp_nov	w	pulchellus group	MCZC	Pedernales	Dominican Republic	2025	0	0.548	0.225	0.641	0.594	0.289	0.693	0.151	0.115	0.166	0.779	0.263	0.241	0.337	0.19	0.139	0.243	0.237	0.254	0	0.424	0.213	0.244	0.161	0.177	0.421	0.528	0.137	0.05	0.9405	0.2085	92.2559	22.1691	85.7143	131.145	35.8586	33.7612	261.491	142.194
CASENT0758816	DL03802	Myrmicinae	Temnothorax	bahoruco_sp_nov	w	pulchellus group	MCZC	Pedernales	Dominican Republic	2025	0	0.53	0.235	0.616	0.569	0.268	0.651	0.138	0.112	0.145	0.733	0.263	0.245	0.312	0.217	0.122	0.225	0.218	0.253	0	0.402	0.196	0.291	0.164	0.154	0.401	0.51	0.126	0.044	0.8945	0.194	93.1459	21.6881	87.404	128.822	34.4464	35.8799	244.512	143.119
CASENT0758817	DL03802	Myrmicinae	Temnothorax	bahoruco_sp_nov	w	pulchellus group	MCZC	Pedernales	Dominican Republic	2025	0	0.56	0.215	0.636	0.604	0.268	0.68	0.152	0.118	0.168	0.805	0.256	0.252	0.338	0.189	0.144	0.254	0.242	0.271	0	0.441	0.204	0.315	0.168	0.175	0.436	0.532	0.134	0.055	0.944	0.211	92.7152	22.3517	88.8235	133.278	33.7748	31.8012	259.524	139.669
MCZENT00510550	DL03501	Myrmicinae	Temnothorax	balaclava_sp_nov	g	pulchellus group	MCZC	Pedernales	Dominican Republic	92	0	0.498	0.253	0.691	0.649	0.268	0.661	0.184	0.153	0.139	1.08	0.278	0.27	0.38	0.18	0.144	0.262	0.199	0.302	0	0.653	0.314	0.295	0.176	0.204	0.47	0.589	0.124	0.051	0.9795	0.2605	76.7334	26.5952	98.1846	166.41	48.3821	25.7407	267.045	190.955
MCZENT00510546	DL03477:004	Myrmicinae	Temnothorax	balaclava_sp_nov	g	pulchellus group	MCZC	Pedernales	Dominican Republic	92	0	0.491	0.244	0.681	0.639	0.259	0.692	0.191	0.162	0.137	1.066	0.253	0.29	0.365	0.18	0.135	0.263	0.187	0.282	0	0.646	0.311	0.303	0.184	0.201	0.477	0.566	0.135	0.054	0.985	0.272	76.8388	27.6142	92.341	166.823	48.6698	23.7336	259.239	195.187
MCZENT00510535	DL03383	Myrmicinae	Temnothorax	balaclava_sp_nov	w	pulchellus group	MCZC	Pedernales	Dominican Republic	125	0	0.41	0.165	0.47	0.425	0.208	0.511	0.122	0.109	0.114	0.561	0.22	0.196	0.252	0.159	0.092	0.162	0.163	0.19	0	0.315	0.138	0.222	0.124	0.135	0.326	0.424	0.112	0.046	0.6805	0.1765	96.4706	25.9368	83.1703	132	32.4706	39.2157	262.903	154.601
MCZENT00510536	DL03388	Myrmicinae	Temnothorax	balaclava_sp_nov	w	pulchellus group	MCZC	Pedernales	Dominican Republic	125	0	0.413	0.166	0.489	0.445	0.211	0.529	0.121	0.1	0.115	0.578	0.22	0.196	0.277	0.143	0.094	0.164	0.174	0.199	0	0.317	0.14	0.21	0.133	0.125	0.322	0.44	0.11	0.042	0.7095	0.171	92.809	24.1015	84.121	129.888	31.4607	38.0623	242.105	159.195
MCZENT00510537	DL03411	Myrmicinae	Temnothorax	balaclava_sp_nov	w	pulchellus group	MCZC	Pedernales	Dominican Republic	126	0	0.471	0.202	0.559	0.507	0.223	0.582	0.14	0.114	0.132	0.638	0.247	0.223	0.299	0.171	0.107	0.192	0.202	0.215	0	0.356	0.156	0.294	0.155	0.147	0.375	0.442	0.121	0.046	0.798	0.197	92.8994	24.6867	87.1134	125.838	30.7692	38.7147	241.935	148.02
MCZENT00510538	DL03433	Myrmicinae	Temnothorax	balaclava_sp_nov	w	pulchellus group	MCZC	Pedernales	Dominican Republic	87	0	0.459	0.186	0.531	0.491	0.222	0.581	0.135	0.102	0.131	0.653	0.246	0.219	0.297	0.186	0.098	0.187	0.188	0.214	0	0.35	0.167	0.239	0.141	0.151	0.361	0.44	0.127	0.047	0.7815	0.186	93.4827	23.8004	84.5095	132.994	34.0122	37.6723	256.028	157.979
CASENT0756153	DL03474	Myrmicinae	Temnothorax	balaclava_sp_nov	w	pulchellus group	MCZC	Pedernales	Dominican Republic	92	0	0.447	0.212	0.556	0.518	0.24	0.612	0.131	0.113	0.149	0.675	0.236	0.223	0.294	0.175	0.116	0.2	0.177	0.228	0	0.376	0.172	0.135	0.141	0.147	0.372	0.454	0.123	0.042	0.824	0.1875	86.2934	22.7549	84.6405	130.309	33.2046	34.963	263.83	166.102
CASENT4010177 (bottom)	DL03474	Myrmicinae	Temnothorax	balaclava_sp_nov	w	pulchellus group	MCZC	Pedernales	Dominican Republic	92	0	0.407	0.181	0.497	0.453	0.201	0.529	0.134	0.103	0.12	0.57	0.22	0.197	0.247	0.131	0.094	0.161	0.167	0.192	0	0.338	0.13	0.201	0.12	0.118	0.322	0.399	0.119	0.045	0.7175	0.1855	89.8455	25.8537	85.6333	125.828	28.6976	38.5965	268.333	147.904
CASENT4010177 (top)	DL03474	Myrmicinae	Temnothorax	balaclava_sp_nov	w	pulchellus group	MCZC	Pedernales	Dominican Republic	92	0	0.432	0.182	0.505	0.471	0.235	0.569	0.127	0.093	0.149	0.625	0.225	0.194	0.272	0.16	0.105	0.178	0.176	0.21	0	0.34	0.148	0.213	0.129	0.122	0.34	0.409	0.122	0.044	0.7555	0.1735	91.7197	22.9649	82.7768	132.696	31.4225	36	263.566	154.545
MCZENT00521295	DL03769	Myrmicinae	Temnothorax	ciferrii	g	pulchellus group	MCZC	Pedernales	Dominican Republic	400m	0	0.552	0.246	0.729	0.68	0.259	0.667	0.209	0.165	0.144	1.141	0.311	0.299	0.421	0.225	0.152	0.272	0.22	0.332	0	0.696	0.35	0.31	0.194	0.194	0.521	0.653	0.13	0.052	1.0135	0.2915	81.1765	28.7617	101.949	167.794	51.4706	27.2568	268.557	191.364
MCZENT00510533 (bottom)	DL03412	Myrmicinae	Temnothorax	ciferrii	w	pulchellus group	MCZC	Pedernales	Dominican Republic	126	0	0.449	0.166	0.501	0.441	0.212	0.516	0.115	0.103	0.132	0.557	0.226	0.206	0.262	0.153	0.079	0.163	0.14	0.19	0	0.329	0.133	0.213	0.129	0.129	0.305	0.432	0.12	0.04	0.699	0.1665	101.814	23.8197	85.4651	126.304	30.1587	40.5745	236.434	187.143
MCZENT00510533 (top)	DL03412	Myrmicinae	Temnothorax	ciferrii	w	pulchellus group	MCZC	Pedernales	Dominican Republic	126	0	0.462	0.163	0.497	0.446	0.198	0.517	0.122	0.107	0.129	0.548	0.226	0.202	0.251	0.138	0.089	0.149	0.158	0.184	0	0.318	0.129	0.222	0.116	0.128	0.313	0.402	0.111	0.039	0.7045	0.1755	103.587	24.9113	86.2669	122.87	28.9238	41.2409	269.828	158.861
MCZENT00510534	DL0398:002	Myrmicinae	Temnothorax	ciferrii	w	pulchellus group	MCZC	Pedernales	Dominican Republic	92m	0	0.413	0.168	0.482	0.437	0.194	0.505	0.118	0.094	0.128	0.532	0.21	0.235	0.252	0.133	0.087	0.165	0.138	0.188	0	0.303	0.14	0.21	0.13	0.123	0.3	0.419	0.109	0.048	0.6895	0.165	94.508	23.9304	86.5347	121.739	32.0366	39.4737	230.769	182.609
CASENT0916003	ANTC42941	Myrmicinae	Temnothorax	ciferrii	w	pulchellus group	PSWC	Independencia	Dominican Republic	43m	0	0.461	0.186	0.533	0.47	0.213	0.574	0.135	0.102	0.139	0.618	0.277	0.218	0.28	0.135	0.091	0.17	0.171	0.204	0	0.342	0.141	0.276	0.132	0.134	0.333	0.45	0.125	0.039	0.757	0.186	98.0851	24.5707	81.8815	131.489	30	44.822	252.273	163.743
CASENT0758330 (bottom)	ANTC43699	Myrmicinae	Temnothorax	ciferrii	w	pulchellus group	UCDC	Cibao Norte	Dominican Republic	150m	0	0.405	0.178	0.499	0.444	0.199	0.532	0.126	0.095	0.133	0.583	0.232	0.217	0.263	0.134	0.088	0.16	0.147	0.179	0	0.331	0.123	0.214	0.127	0.111	0.313	0.409	0.116	0.046	0.71	0.1735	91.2162	24.4366	83.4586	131.306	27.7027	39.7942	246.457	178.912
CASENT0758330 (middle)	ANTC43699	Myrmicinae	Temnothorax	ciferrii	w	pulchellus group	UCDC	Cibao Norte	Dominican Republic	150m	0	0.454	0.19	0.548	0.501	0.214	0.576	0.14	0.106	0.138	0.63	0.258	0.229	0.297	0.182	0.101	0.181	0.164	0.205	0	0.366	0.155	0.244	0.142	0.122	0.349	0.446	0.132	0.047	0.789	0.193	90.6188	24.4613	86.9792	125.749	30.9381	40.9524	245.775	181.098
CASENT0758828	ANTC43699	Myrmicinae	Temnothorax	ciferrii	w	pulchellus group	UCDC	Cibao Norte	Dominican Republic	150m	0	0.433	0.146	0.493	0.453	0.201	0.541	0.128	0.108	0.129	0.585	0.232	0.211	0.268	0.161	0.099	0.168	0.184	0.207	0	0.328	0.129	0.225	0.134	0.112	0.326	0.421	0.123	0.049	0.7235	0.182	95.585	25.1555	83.7338	129.139	28.4768	39.6581	243.284	145.652
CASENT0758829	ANTC43699	Myrmicinae	Temnothorax	ciferrii	w	pulchellus group	UCDC	Cibao Norte	Dominican Republic	150m	0	0.42	0.169	0.487	0.443	0.194	0.523	0.126	0.103	0.122	0.572	0.226	0.206	0.271	0.149	0.1	0.174	0.147	0.204	0	0.334	0.144	0.226	0.14	0.116	0.321	0.387	0.116	0.043	0.7045	0.1775	94.8081	25.1952	84.7036	129.12	32.5056	39.5105	229.286	184.354
CASENT0758830	ANTC43699	Myrmicinae	Temnothorax	ciferrii	w	pulchellus group	UCDC	Cibao Norte	Dominican Republic	150m	0	0.422	0.181	0.502	0.45	0.196	0.533	0.129	0.103	0.137	0.578	0.233	0.205	0.274	0.17	0.093	0.181	0.157	0.202	0	0.338	0.144	0.221	0.134	0.121	0.313	0.4	0.127	0.056	0.7165	0.1805	93.7778	25.1919	84.4278	128.444	32	40.3114	233.582	174.522
MCZENT00021015 (bottom)	ANTC43704	Myrmicinae	Temnothorax	flavidulus	g	pulchellus group	MCZC	Ouest	Haiti	100m	0	0.536	0.248	0.723	0.647	0.249	0.675	0.219	0.179	0.148	1.114	0.253	0.245	0.363	0.216	0.137	0.274	0.208	0.321	0	0.704	0.334	0.328	0.212	0.206	0.514	0.594	0.146	0.058	0.9845	0.3085	82.8439	31.3357	95.8519	172.179	51.6229	22.711	242.453	174.519
MCZENT00021015 (top, left)	ANTC43704	Myrmicinae	Temnothorax	flavidulus	w	pulchellus group	MCZC	Ouest	Haiti	100m	0	n/a	0.174	0.529	0.472	0.206	0.552	0.144	0.114	0.143	0.6	0.268	0.214	0.302	0.176	0.1	0.185	0.194	0.21	0	0.35	0.164	0.237	0.155	0.141	0.346	0.437	0.104	0.041	0.748	0.201	n/a	26.8717	85.5072	127.119	34.7458	44.6667	223.226	155.67
MCZENT00021015 (top, right)	ANTC43704	Myrmicinae	Temnothorax	flavidulus	w	pulchellus group	MCZC	Ouest	Haiti	100m	0	0.45	0.17	0.502	0.45	0.192	0.53	0.137	0.103	0.14	0.603	0.246	0.229	0.277	0.145	0.111	0.172	0.167	0.229	0	0.341	0.15	0.232	0.139	0.136	0.35	0.432	0.125	0.054	0.715	0.1885	100	26.3636	84.9057	134	33.3333	40.796	251.799	165.868
CASENT0758361 (left)	ANTC43704	Myrmicinae	Temnothorax	flavidulus	w	pulchellus group	USNM	Ouest	Haiti	100m	0	0.442	0.16	0.503	0.444	0.198	0.535	0.139	0.109	0.139	0.6	0.272	0.21	0.272	0.162	0.101	0.171	0.151	0.204	0	0.338	0.147	0.26	0.134	0.142	0.351	0.419	0.122	0.043	0.7115	0.1935	99.5495	27.1961	82.9907	135.135	33.1081	45.3333	261.94	180.132
CASENT0758361 (right)	ANTC43704	Myrmicinae	Temnothorax	flavidulus	w	pulchellus group	USNM	Ouest	Haiti	100m	0	0.427	0.162	0.492	0.46	0.196	0.532	0.145	0.102	0.123	0.572	0.236	0.201	0.278	0.142	0.105	0.173	0.173	0.214	0	0.339	0.147	0.24	0.13	0.156	0.325	0.405	0.132	0.054	0.726	0.196	92.8261	26.9972	86.4662	124.348	31.9565	41.2587	250	160.694
CASENT0758362	ANTC43704	Myrmicinae	Temnothorax	flavidulus	w	pulchellus group	USNM	Ouest	Haiti	100m	0	0.447	0.185	0.506	0.444	0.182	0.536	0.134	0.117	0.143	0.604	0.258	0.249	0.261	0.151	0.101	0.165	0.164	0.202	0	0.342	0.149	0.231	0.136	0.141	0.339	0.471	0.128	0.043	0.712	0.1925	100.676	27.0365	82.8358	136.036	33.5586	42.7152	249.265	159.146
CASENT0756156	SPCDR-152	Myrmicinae	Temnothorax	harlequina_sp_nov	w	pulchellus group	MCZC	La Altagracia	Dominican Republic	10	0	0.503	0.22	0.57	0.524	0.231	0.595	0.132	0.107	0.136	0.656	0.283	0.209	0.304	0.165	0.1	0.199	0.16	0.215	0	0.393	0.165	0.28	0.146	0.17	0.355	0.485	0.132	0.048	0.8215	0.1855	95.9924	22.5806	88.0672	125.191	31.4885	43.1402	243.151	190
CASENT0758709	SPCDR-152	Myrmicinae	Temnothorax	harlequina_sp_nov	w	pulchellus group	MCZC	La Altagracia	Dominican Republic	10	0	0.467	0.194	0.537	0.476	0.225	0.558	0.126	0.105	0.125	0.601	0.27	0.194	0.284	0.142	0.104	0.179	0.157	0.178	0	0.36	0.148	0.252	0.134	0.153	0.309	0.43	0.124	0.048	0.755	0.1785	98.1092	23.6424	85.3047	126.261	31.0924	44.9251	230.597	180.892
CASENT0758825	SPCDR-152	Myrmicinae	Temnothorax	harlequina_sp_nov	w	pulchellus group	MCZC	La Altagracia	Dominican Republic	10	0	0.504	0.208	0.574	0.519	0.235	0.591	0.126	0.103	0.159	0.661	0.269	0.213	0.299	0.166	0.111	0.199	0.15	0.215	0	0.382	0.162	0.301	0.15	0.165	0.351	0.469	0.13	0.046	0.7335	0.1655	95.7082	22.5631	87.8173	123.605	27.897	40.2778	242.52	196.269
CASENT0758826	SPCDR-152	Myrmicinae	Temnothorax	harlequina_sp_nov	w	pulchellus group	MCZC	La Altagracia	Dominican Republic	10	0	0.459	0.202	0.53	0.473	0.211	0.545	0.127	0.1	0.125	0.607	0.252	0.186	0.276	0.151	0.09	0.173	0.162	0.187	0	0.36	0.139	0.263	0.139	0.146	0.313	0.443	0.116	0.05	0.7455	0.177	97.0402	23.7425	86.789	128.33	29.3869	41.5157	225.18	170.37
CASENT0758827	SPCDR-152	Myrmicinae	Temnothorax	harlequina_sp_nov	w	pulchellus group	MCZC	La Altagracia	Dominican Republic	10	0	0.47	0.198	0.529	0.48	0.21	0.553	0.126	0.096	0.135	0.612	0.26	0.19	0.268	0.166	0.098	0.192	0.166	0.189	0	0.356	0.131	0.244	0.132	0.14	0.302	0.449	0.126	0.042	0.7565	0.174	97.9167	23.0007	86.7993	127.5	27.2917	42.4837	228.788	161.446
CASENT0756091	SPCDR-151	Myrmicinae	Temnothorax	harlequina_sp_nov	w	pulchellus group	MMPC	La Altagracia	Dominican Republic	10m	0	0.461	0.187	0.52	0.476	0.227	0.549	0.138	0.104	0.112	0.592	0.252	0.189	0.272	0.148	0.096	0.173	0.148	0.182	0	0.355	0.137	0.29	0.139	0.129	0.32	0.455	0.112	0.044	0.7505	0.19	96.8487	25.3165	86.7031	124.37	28.7815	42.5676	230.216	183.784
CASENT0758822	SPCDR-151	Myrmicinae	Temnothorax	harlequina_sp_nov	w	pulchellus group	MMPC	La Altagracia	Dominican Republic	10m	0	0.458	0.197	0.552	0.499	0.227	0.57	0.127	0.1	0.133	0.613	0.254	0.205	0.287	0.154	0.109	0.192	0.155	0.201	0	0.371	0.139	0.253	0.148	0.146	0.329	0.459	0.131	0.057	0.784	0.177	91.7836	22.5765	87.5439	122.846	27.8557	41.4356	222.297	185.161
CASENT0758823	SPCDR-151	Myrmicinae	Temnothorax	harlequina_sp_nov	w	pulchellus group	MMPC	La Altagracia	Dominican Republic	10m	0	0.438	0.17	0.475	0.432	0.204	0.496	0.113	0.088	0.123	0.55	0.226	0.185	0.248	0.131	0.1	0.172	0.145	0.17	0	0.323	0.115	0.243	0.116	0.127	0.284	0.403	0.113	0.044	0.68	0.157	101.389	23.0882	87.0968	127.315	26.6204	41.0909	244.828	171.034
CASENT0758824	SPCDR-151	Myrmicinae	Temnothorax	harlequina_sp_nov	w	pulchellus group	MMPC	La Altagracia	Dominican Republic	10m	0	0.446	0.18	0.512	0.466	0.208	0.535	0.119	0.093	0.122	0.576	0.232	0.183	0.263	0.138	0.108	0.186	0.134	0.19	0	0.347	0.13	0.294	0.127	0.13	0.308	0.43	0.116	0.046	0.7335	0.1655	95.7082	22.5631	87.1028	123.605	27.897	40.2778	242.52	196.269
LACMENT323469	ANTC43075	Myrmicinae	Temnothorax	hippolytus_sp_nov	w	pulchellus group	LACM	Camaguey	Cuba	100m	0	0.467	0.166	0.514	0.467	0.253	0.583	0.114	0.088	0.141	0.635	0.197	0.207	0.278	0.137	0.115	0.193	0.161	0.218	0	0.346	0.162	0.24	0.136	0.156	0.339	0.47	0.124	0.049	0.7585	0.158	100	20.8306	80.1029	135.974	34.6895	31.0236	249.265	172.671
MCZENT00510556	DL03387	Myrmicinae	Temnothorax	laricrus_sp_nov	g	pulchellus group	MCZC	Pedernales	Dominican Republic	125	1	0.711	0.302	0.865	0.811	0.329	0.813	0.221	0.165	0.176	1.306	0.276	0.328	0.46	0.256	0.174	0.344	0.192	0.327	0	0.811	0.354	0.336	0.222	0.25	0.525	0.732	0.194	0.058	1.2175	0.3035	87.6695	24.9281	99.754	161.036	43.6498	21.1332	236.486	239.583
CASENT4010181	DL03387	Myrmicinae	Temnothorax	laricrus_sp_nov	w	pulchellus group	MCZC	Pedernales	Dominican Republic	125	1	0.674	0.248	0.714	0.66	0.31	0.737	0.154	0.122	0.183	0.907	0.165	0.287	0.381	0.244	0.127	0.243	0.211	0.254	0	0.491	0.156	0.161	0.185	0.136	0.426	0.627	0.226	0.055	1.0285	0.215	102.121	20.9042	89.5522	137.424	23.6364	18.1918	230.27	180.569
CASENT4010182	DL03387	Myrmicinae	Temnothorax	laricrus_sp_nov	w	pulchellus group	MCZC	Pedernales	Dominican Republic	125	1	0.665	0.257	0.729	0.677	0.309	0.752	0.158	0.128	0.197	0.933	0.162	0.276	0.388	0.254	0.136	0.254	0.179	0.26	0	0.515	0.155	0.167	0.189	0.148	0.437	0.649	0.235	0.056	1.053	0.222	98.2275	21.0826	90.0266	137.814	22.8951	17.3633	231.217	216.76
MCZENT00510558	DL03388	Myrmicinae	Temnothorax	laricrus_sp_nov	w	pulchellus group	MCZC	Pedernales	Dominican Republic	125	1	0.635	0.246	0.689	0.652	0.3	0.739	0.161	0.122	0.181	0.893	0.154	0.275	0.378	0.227	0.129	0.233	0.195	0.249	0	0.487	0.155	0.142	0.177	0.138	0.412	0.597	0.218	0.059	1.0215	0.222	97.3926	21.7327	88.2273	136.963	23.773	17.2452	232.768	193.846
MCZENT00512198	ANTC43702	Myrmicinae	Temnothorax	laricrus_sp_nov	w	pulchellus group	MCZC	Pedernales	Dominican Republic	194m	1	n/a	0.26	0.737	0.691	0.319	0.762	0.15	0.116	0.201	0.919	0.182	0.279	0.388	0.236	0.13	0.253	0.222	0.265	0	0.503	0.162	0.176	0.196	0.174	0.447	0.621	0.237	0.06	1.072	0.208	n/a	19.403	90.6824	132.996	23.4443	19.8041	228.061	174.775
MCZENT00594613	ANTC43701	Myrmicinae	Temnothorax	laricrus_sp_nov	w	pulchellus group	MCZC	Pedernales	Dominican Republic	94m	1	0.625	0.267	0.699	0.663	0.317	0.746	0.147	0.114	0.184	0.886	0.173	0.266	0.393	0.247	0.127	0.248	0.202	0.25	0	0.502	0.149	0.16	0.178	0.164	0.432	0.576	0.217	0.057	1.036	0.204	94.2685	19.6911	88.874	133.635	22.4736	19.526	242.697	194.554
CASENT0733974	DL03387	Myrmicinae	Temnothorax	laricrus_sp_nov	w	pulchellus group	UCDC	Pedernales	Dominican Republic	125m	1	0.69	0.273	0.747	0.688	0.314	0.766	0.172	0.124	0.193	0.93	0.176	0.281	0.395	0.238	0.144	0.255	0.216	0.275	0	0.516	0.171	0.163	0.189	0.171	0.433	0.628	0.227	0.056	1.071	0.234	100.291	21.8487	89.8172	135.174	24.8547	18.9247	229.101	182.87
CASENT0758263	DL03387	Myrmicinae	Temnothorax	laricrus_sp_nov	w	pulchellus group	UCDC	Pedernales	Dominican Republic	125m	1	0.666	0.26	0.734	0.695	0.304	0.766	0.159	0.127	0.18	0.949	0.185	0.279	0.377	0.249	0.137	0.254	0.215	0.271	0	0.517	0.162	0.173	0.185	0.163	0.436	0.633	0.222	0.058	1.078	0.2225	95.8273	20.6401	90.7311	136.547	23.3094	19.4942	235.676	175.349
LACMENT323205	JKW-2005-160	Myrmicinae	Temnothorax	magnabulla_sp_nov	w	pulchellus group	LACM	St. Croix	United States Virgin Islands	10	0	0.533	0.215	0.642	0.591	0.261	0.667	0.15	0.118	0.154	0.748	0.243	0.23	0.336	0.203	0.126	0.218	0.198	0.243	0	0.393	0.176	0.239	0.164	0.164	0.393	0.507	0.144	0.052	0.9245	0.209	90.1861	22.6068	88.6057	126.565	29.78	32.4866	239.634	169.697
LACMENT323206	JKW-2005-201	Myrmicinae	Temnothorax	magnabulla_sp_nov	w	pulchellus group	LACM	St. Croix	United States Virgin Islands	5	0	0.507	0.182	0.598	0.555	0.253	0.64	0.145	0.105	0.15	0.729	0.223	0.223	0.324	0.163	0.117	0.205	0.217	0.22	0	0.394	0.151	0.207	0.15	0.15	0.355	0.506	0.159	0.061	0.875	0.1975	91.3514	22.5714	86.7188	131.351	27.2072	30.5898	236.667	149.309
CASENT0756093	JKW-2005-160	Myrmicinae	Temnothorax	magnabulla_sp_nov	w	pulchellus group	MMPC	St. Croix	United States Virgin Islands	10m	0	0.528	0.214	0.634	0.574	0.255	0.652	0.146	0.115	0.165	0.76	0.242	0.233	0.332	0.182	0.126	0.219	0.199	0.264	0	0.39	0.182	0.237	0.164	0.16	0.391	0.508	0.143	0.057	0.9	0.2035	91.9861	22.6111	88.0368	132.404	31.7073	31.8421	238.415	166.834
CASENT0758673	JKW-2005-160	Myrmicinae	Temnothorax	magnabulla_sp_nov	w	pulchellus group	UCDC	St. Croix	United States Virgin Islands	10m	0	0.458	0.185	0.555	0.507	0.238	0.583	0.119	0.091	0.147	0.638	0.203	0.207	0.293	0.173	0.11	0.187	0.182	0.213	0	0.34	0.14	0.191	0.135	0.13	0.327	0.454	0.122	0.042	0.7985	0.1645	90.3353	20.6011	86.964	125.838	27.6134	31.8182	242.222	160.989
LACMENT323203 (bottom)	RRS02-209	Myrmicinae	Temnothorax	pulchellus	g	pulchellus group	LACM	Guana Island	British Virgin Islands	5	0	0.577	0.249	0.75	0.69	0.278	0.707	0.208	0.16	0.168	1.134	0.278	0.301	0.438	0.192	0.173	0.302	0.195	0.351	0	0.697	0.354	0.349	0.21	0.212	0.58	0.611	0.153	0.062	1.0435	0.288	83.6232	27.5994	97.5955	164.348	51.3043	24.515	276.19	224.615
LACMENT323203 (middle)	RRS02-209	Myrmicinae	Temnothorax	pulchellus	w	pulchellus group	LACM	Guana Island	British Virgin Islands	5	0	0.495	0.198	0.578	0.519	0.24	0.609	0.135	0.104	0.138	0.652	0.237	0.221	0.318	0.186	0.128	0.211	0.18	0.227	0	0.375	0.154	0.224	0.146	0.152	0.379	0.458	0.132	0.05	0.8235	0.187	95.3757	22.708	85.2217	125.626	29.6724	36.3497	259.589	176.667
LACMENT323203 (top)	RRS02-209	Myrmicinae	Temnothorax	pulchellus	w	pulchellus group	LACM	Guana Island	British Virgin Islands	5	0	0.382	0.163	0.457	0.407	0.189	0.492	0.108	0.075	0.119	0.521	0.169	0.169	0.229	0.14	0.107	0.165	0.158	0.185	0	0.286	0.123	0.17	0.119	0.106	0.299	0.383	0.117	0.043	0.653	0.1455	93.8575	22.2818	82.7236	128.01	30.2211	32.4376	251.261	144.937
LACMENT323204 (middle)	RRS02-228	Myrmicinae	Temnothorax	pulchellus	w	pulchellus group	LACM	Guana Island	British Virgin Islands	5	0	0.489	0.205	0.557	0.506	0.263	0.61	0.134	0.102	0.136	0.651	0.229	0.219	0.321	0.179	0.113	0.198	0.196	0.214	0	0.368	0.154	0.206	0.141	0.139	0.379	0.474	0.132	0.057	0.811	0.185	96.6403	22.8113	82.9508	128.656	30.4348	35.1767	268.794	163.776
LACMENT323204 (top)	RRS02-228	Myrmicinae	Temnothorax	pulchellus	w	pulchellus group	LACM	Guana Island	British Virgin Islands	5	0	0.432	0.193	0.509	0.454	0.222	0.553	0.117	0.092	0.122	0.583	0.218	0.198	0.27	0.157	0.101	0.178	0.171	0.195	0	0.329	0.129	0.201	0.119	0.113	0.325	0.409	0.105	0.039	0.7305	0.163	95.1542	22.3135	82.0976	128.414	28.4141	37.3928	273.109	157.895
LACMENT323204(bottom)	RRS02-228	Myrmicinae	Temnothorax	pulchellus	w	pulchellus group	LACM	Guana Island	British Virgin Islands	5	0	0.489	0.21	0.565	0.522	0.243	0.61	0.13	0.103	0.158	0.656	0.236	0.2	0.298	0.193	0.12	0.207	0.201	0.224	0	0.362	0.145	0.205	0.143	0.14	0.376	0.455	0.14	0.055	0.827	0.1815	93.6782	21.9468	85.5738	125.67	27.7778	35.9756	262.937	148.259
LACMENT323207	JKW-2005-321	Myrmicinae	Temnothorax	pulchellus	w	pulchellus group	LACM	St. John	United States Virgin Islands	5m	0	0.428	0.175	0.488	0.439	0.215	0.531	0.134	0.095	0.118	0.575	0.176	0.191	0.252	0.143	0.096	0.169	0.186	0.206	0	0.32	0.126	0.196	0.122	0.119	0.303	0.457	0.131	0.046	0.7045	0.1815	97.4943	25.763	82.6742	130.979	28.7016	30.6087	248.361	135.484
LACMENT323208 (bottom)	RRS02-210	Myrmicinae	Temnothorax	pulchellus	w	pulchellus group	LACM	Guana Island	British Virgin Islands	5m	0	0.516	0.211	0.603	0.535	0.254	0.635	0.137	0.097	0.139	0.673	0.262	0.222	0.321	0.183	0.129	0.212	0.197	0.222	0	0.376	0.156	0.224	0.148	0.144	0.3778	0.502	0.129	0.052	0.8525	0.1855	96.4486	21.7595	84.252	125.794	29.1589	38.9302	255.27	162.944
LACMENT323208 (middle)	RRS02-210	Myrmicinae	Temnothorax	pulchellus	w	pulchellus group	LACM	Guana Island	British Virgin Islands	5m	0	0.51	0.203	0.599	0.542	0.255	0.635	0.141	0.104	0.148	0.69	0.261	0.214	0.337	0.187	0.127	0.204	0.201	0.243	0	0.385	0.144	0.225	0.154	0.14	0.395	0.497	0.138	0.052	0.8595	0.193	94.0959	22.4549	85.3543	127.306	26.5683	37.8261	256.494	167.662
LACMENT323208 (top)	RRS02-210	Myrmicinae	Temnothorax	pulchellus	w	pulchellus group	LACM	Guana Island	British Virgin Islands	5m	0	0.488	0.197	0.57	0.511	0.239	0.598	0.129	0.096	0.148	0.657	0.231	0.218	0.313	0.166	0.118	0.19	0.205	0.213	0	0.358	0.156	0.217	0.153	0.136	0.371	0.461	0.134	0.045	0.81	0.177	95.499	21.8519	85.4515	128.571	30.5284	35.1598	242.484	152.683
CASENT0915980 (bottom)	PSW14441-1	Myrmicinae	Temnothorax	terricola	w	pulchellus group	PSWC	Guantanamo	Cuba	20m	0	0.382	0.15	0.471	0.421	0.236	0.524	0.107	0.082	0.114	0.552	0.193	0.178	0.233	0.155	0.099	0.166	0.146	0.157	0	0.291	0.134	0.188	0.109	0.114	0.261	0.347	0.113	0.043	0.683	0.148	90.7363	21.6691	80.3435	131.116	31.829	34.9638	239.45	159.589
CASENT0915980 (top)	PSW14441-1	Myrmicinae	Temnothorax	terricola	w	pulchellus group	PSWC	Guantanamo	Cuba	20m	0	0.383	0.152	0.471	0.441	0.229	0.522	0.112	0.088	0.103	0.567	0.188	0.187	0.227	0.152	0.096	0.164	0.137	0.163	0	0.302	0.142	0.173	0.123	0.12	0.27	0.357	0.096	0.042	0.702	0.156	86.8481	22.2222	84.4828	128.571	32.1995	33.157	219.512	165.693
CASENT0712509	PSW14453-6	Myrmicinae	Temnothorax	terricola	w	pulchellus group	UCDC	Guantanamo	Cuba	500m	0	0.36	0.147	0.428	0.397	0.229	0.495	0.102	0.079	0.105	0.537	0.18	0.163	0.203	0.14	0.084	0.146	0.144	0.138	0	0.277	0.116	0.155	0.102	0.106	0.238	0.312	0.117	0.041	0.6445	0.1415	90.6801	21.955	80.202	135.264	29.2191	33.5196	233.333	140.972
CASENT0758300 (bottom)	PSW14453-6	Myrmicinae	Temnothorax	terricola	w	pulchellus group	UCDC	Guantanamo	Cuba	500m	0	0.349	0.13	0.401	0.36	0.213	0.471	0.099	0.069	0.094	0.493	0.147	0.161	0.2	0.13	0.093	0.147	0.133	0.136	0	0.268	0.12	0.147	0.099	0.096	0.236	0.31	0.098	0.036	0.5955	0.1335	96.9444	22.4181	76.4331	136.944	33.3333	29.8174	238.384	150.376
CASENT0758300 (middle)	PSW14453-6	Myrmicinae	Temnothorax	terricola	w	pulchellus group	UCDC	Guantanamo	Cuba	500m	0	0.369	0.138	0.439	0.413	0.219	0.509	0.105	0.083	0.109	0.555	0.173	0.165	0.227	0.136	0.089	0.157	0.143	0.157	0	0.283	0.128	0.154	0.109	0.108	0.258	0.349	0.104	0.038	0.6675	0.1465	89.3462	21.9476	81.1395	134.383	30.9927	31.1712	236.697	158.741
CASENT0758300 (top)	PSW14453-6	Myrmicinae	Temnothorax	terricola	w	pulchellus group	UCDC	Guantanamo	Cuba	500m	0	0.376	0.139	0.446	0.406	0.227	0.505	0.106	0.081	0.095	0.53	0.172	0.17	0.216	0.144	0.096	0.164	0.137	0.166	0	0.288	0.132	0.164	0.103	0.114	0.249	0.334	0.089	0.044	0.6585	0.1465	92.6108	22.2475	80.396	130.542	32.5123	32.4528	241.748	157.664
CASENT0758707	PSW14453-6	Myrmicinae	Temnothorax	terricola	w	pulchellus group	UCDC	Guantanamo	Cuba	500m	0	0.364	0.134	0.444	0.411	0.236	0.509	0.101	0.082	0.1	0.544	0.175	0.168	0.214	0.14	0.094	0.155	0.129	0.143	0	0.288	0.137	0.168	0.1	0.111	0.255	0.355	0.111	0.053	0.6655	0.142	88.5645	21.3373	80.7466	132.36	33.3333	32.1691	255	165.891
USNMENT00532116 (bottom)	ANTC43809	Myrmicinae	Temnothorax	terricola	w	pulchellus group	USNM	Guantanamo	Cuba	5m	0	0.393	0.158	0.462	0.435	0.225	0.518	0.114	0.091	0.095	0.569	0.204	0.192	0.219	0.149	0.074	0.147	0.144	0.17	0	0.297	0.147	0.178	0.115	0.107	0.264	0.354	0.125	0.049	0.694	0.1595	90.3448	22.9827	83.9768	130.805	33.7931	35.8524	229.565	152.083
USNMENT00532116 (middle)	ANTC43809	Myrmicinae	Temnothorax	terricola	w	pulchellus group	USNM	Guantanamo	Cuba	5m	0	0.375	0.155	0.446	0.411	0.238	0.521	0.114	0.085	0.122	0.55	0.177	0.188	0.223	0.138	0.084	0.146	0.149	0.175	0	0.286	0.132	0.151	0.118	0.11	0.254	0.362	0.11	0.047	0.6715	0.1565	91.2409	23.306	78.8868	133.82	32.1168	32.1818	215.254	149.664
USNMENT00532116 (top, right)	ANTC43809	Myrmicinae	Temnothorax	terricola	w	pulchellus group	USNM	Guantanamo	Cuba	5m	0	0.391	0.164	0.469	0.437	0.232	0.525	0.114	0.079	0.108	0.597	0.164	0.22	0.251	0.151	0.094	0.14	0.134	0.144	0	0.295	0.138	0.164	0.118	0.105	0.265	0.36	0.096	0.04	0.6995	0.1535	89.4737	21.9442	83.2381	136.613	31.5789	27.4707	224.576	187.313
USNMENT00922870 (top, right)	ANTC43809	Myrmicinae	Temnothorax	terricola	w	pulchellus group	USNM	Guantanamo	Cuba	5m	0	0.383	0.131	0.46	0.429	0.232	0.525	0.115	0.092	0.118	0.562	0.175	0.2	0.23	0.147	0.086	0.157	0.147	0.175	0	0.296	0.13	0.157	0.111	0.113	0.268	0.36	0.101	0.044	0.6915	0.161	89.2774	23.2827	81.7143	131.002	30.303	31.1388	241.441	156.463
USNMENT00922871 (bottom)	ANTC43809	Myrmicinae	Temnothorax	terricola	w	pulchellus group	USNM	Guantanamo	Cuba	5m	0	0.401	0.136	0.442	0.406	0.213	0.499	0.107	0.077	0.12	0.546	0.163	0.172	0.204	0.134	0.092	0.147	0.16	0.153	0	0.285	0.133	0.167	0.102	0.112	0.25	0.344	0.131	0.048	0.6555	0.1455	98.7685	22.1968	81.3627	134.483	32.7586	29.8535	245.098	127.5
USNMENT00922871 (top, left)	ANTC43809	Myrmicinae	Temnothorax	terricola	w	pulchellus group	USNM	Guantanamo	Cuba	5m	0	0.401	0.145	0.463	0.423	0.243	0.551	0.12	0.088	0.122	0.569	0.174	0.194	0.225	0.155	0.092	0.17	0.133	0.162	0	0.306	0.145	0.181	0.116	0.112	0.277	0.37	0.113	0.044	0.6985	0.164	94.7991	23.4789	76.7695	134.515	34.279	30.58	238.793	169.173
USNMENT00922871 (top, right)	ANTC43809	Myrmicinae	Temnothorax	terricola	w	pulchellus group	USNM	Guantanamo	Cuba	5m	0	0.394	0.157	0.462	0.431	0.227	0.524	0.126	0.101	0.105	0.556	0.172	0.185	0.213	0.164	0.087	0.157	0.132	0.153	0	0.301	0.134	0.162	0.114	0.104	0.264	0.356	0.111	0.044	0.693	0.1765	91.4153	25.469	82.2519	129.002	31.0905	30.9353	231.579	161.364
CASENT0758351 (bottom)	ANTC43808	Myrmicinae	Temnothorax	torrei	w	pulchellus group	PSWC	Exuma Cays	Bahamas	5m	0	0.344	0.139	0.426	0.387	0.195	0.484	0.101	0.079	0.117	0.495	0.158	0.169	0.208	0.128	0.091	0.154	0.127	0.164	0	0.267	0.12	0.168	0.107	0.107	0.261	0.315	0.105	0.046	0.629	0.1405	88.8889	22.337	79.9587	127.907	31.0078	31.9192	243.925	163.78
CASENT0758351 (middle)	ANTC43808	Myrmicinae	Temnothorax	torrei	w	pulchellus group	PSWC	Exuma Cays	Bahamas	5m	0	0.349	0.138	0.437	0.394	0.215	0.5	0.104	0.084	0.103	0.526	0.161	0.17	0.222	0.14	0.086	0.15	0.124	0.163	0	0.281	0.132	0.171	0.12	0.118	0.269	0.322	0.1	0.043	0.644	0.146	88.5787	22.6708	78.8	133.503	33.5025	30.6084	224.167	179.032
CASENT0758351 (top)	ANTC43808	Myrmicinae	Temnothorax	torrei	w	pulchellus group	PSWC	Exuma Cays	Bahamas	5m	0	0.353	0.136	0.43	0.393	0.217	0.506	0.104	0.079	0.105	0.534	0.161	0.168	0.227	0.133	0.087	0.156	0.134	0.151	0	0.285	0.13	0.167	0.104	0.101	0.259	0.339	0.102	0.041	0.646	0.1435	89.8219	22.2136	77.668	135.878	33.0789	30.1498	249.038	169.403
CASENT0758352 (bottom)	ANTC43808	Myrmicinae	Temnothorax	torrei	w	pulchellus group	PSWC	Exuma Cays	Bahamas	5m	0	0.338	0.141	0.41	0.374	0.187	0.463	0.103	0.078	0.093	0.505	0.152	0.162	0.206	0.136	0.086	0.144	0.122	0.154	0	0.261	0.121	0.151	0.101	0.099	0.263	0.312	0.086	0.044	0.6055	0.142	90.3743	23.4517	80.7775	135.027	32.3529	30.099	260.396	168.852
CASENT0758352 (middle)	ANTC43808	Myrmicinae	Temnothorax	torrei	w	pulchellus group	PSWC	Exuma Cays	Bahamas	5m	0	0.329	0.116	0.38	0.35	0.199	0.447	0.099	0.078	0.1	0.457	0.14	0.145	0.179	0.128	0.071	0.138	0.11	0.148	0	0.243	0.102	0.132	0.089	0.088	0.23	0.271	0.077	0.038	0.5735	0.138	94	24.0628	78.2998	130.571	29.1429	30.6346	258.427	162.727
CASENT0758352 (top)	ANTC43808	Myrmicinae	Temnothorax	torrei	w	pulchellus group	PSWC	Exuma Cays	Bahamas	5m	0	0.368	0.15	0.441	0.404	0.215	0.515	0.11	0.086	0.123	0.542	0.163	0.18	0.235	0.149	0.097	0.167	0.152	0.171	0	0.296	0.138	0.181	0.119	0.122	0.282	0.349	0.107	0.048	0.6615	0.153	91.0891	23.1293	78.4466	134.158	34.1584	30.0738	236.975	154.605
MCZENT00583612	ANTC43818	Myrmicinae	Temnothorax	torrei	g	pulchellus group	MCZC	Florida	United States	5m	0	0.393	0.171	0.556	0.526	0.222	0.572	0.179	0.136	0.104	0.888	0.214	0.226	0.311	0.177	0.108	0.211	0.153	0.234	0	0.514	0.282	0.256	0.169	0.192	0.379	0.437	0.114	0.047	0.812	0.247	74.7148	30.4187	91.958	168.821	53.6122	24.0991	224.26	203.268
CASENT0758306	ANTC43820	Myrmicinae	Temnothorax	torrei	g	pulchellus group	USNM	Florida	United States	5m	0	0.401	0.186	0.565	0.533	0.231	0.58	0.178	0.145	0.105	0.878	0.206	0.218	0.307	0.167	0.108	0.221	0.146	0.244	0	0.531	0.28	0.252	0.152	0.185	0.382	0.426	0.106	0.043	0.823	0.2505	75.2345	30.4374	91.8966	164.728	52.5328	23.4624	251.316	210.274
MCZENT00016562	ANTC43819	Myrmicinae	Temnothorax	torrei	w	pulchellus group	MCZC	Villa Clara	Cuba	10m	0	0.375	0.143	0.44	0.405	0.239	0.515	0.105	0.085	0.119	0.541	0.209	0.189	0.25	0.168	0.11	0.176	0.166	0.214	0	0.286	0.151	0.209	0.117	0.129	0.327	0.354	0.1	0.039	0.6625	0.1475	92.5926	22.2642	78.6408	133.58	37.284	38.6322	279.487	150.602
MCZENT00583611	ANTC43818	Myrmicinae	Temnothorax	torrei	w	pulchellus group	MCZC	Florida	United States	5m	0	0.355	0.144	0.433	0.41	0.222	0.512	0.109	0.076	0.109	0.527	0.2	0.182	0.222	0.151	0.092	0.165	0.16	0.161	0	0.291	0.123	0.176	0.121	0.115	0.285	0.336	0.1	0.036	0.666	0.147	86.5854	22.0721	80.0781	128.537	30	37.9507	235.537	138.75
CASENT0104776	PSW5749A	Myrmicinae	Temnothorax	torrei	w	pulchellus group	UCDC	Florida	United States	10m	0	0.31	0.12	0.389	0.362	0.202	0.465	0.092	0.071	0.104	0.467	0.138	0.161	0.2	0.123	0.077	0.14	0.124	0.135	0	0.255	0.112	0.166	0.104	0.098	0.234	0.29	0.084	0.04	0.5945	0.1275	85.6354	21.4466	77.8495	129.006	30.9392	29.5503	225	161.29
CASENT0733969	CSM2216	Myrmicinae	Temnothorax	torrei	w	pulchellus group	UCDC	Florida	United States	10m	0	0.339	0.145	0.438	0.393	0.236	0.513	0.103	0.079	0.111	0.529	0.161	0.184	0.231	0.142	0.09	0.154	0.125	0.164	0	0.3	0.133	0.184	0.129	0.128	0.301	0.329	0.104	0.041	0.6495	0.1425	86.2595	21.94	76.6082	134.606	33.8422	30.4348	233.333	184.8
CASENT0756094	JKW-2007-483	Myrmicinae	Temnothorax	wettereri_sp_nov	w	pulchellus group	MMPC	Barbuda	Antigua & Barbuda	20m	0	0.519	0.177	0.578	0.532	0.247	0.619	0.145	0.108	0.155	0.646	0.241	0.212	0.295	0.187	0.115	0.193	0.18	0.21	0	0.36	0.14	0.204	0.138	0.138	0.326	0.486	0.119	0.046	0.8415	0.199	97.5564	23.6482	85.9451	121.429	26.3158	37.3065	236.232	163.889
CASENT0758818	JKW-2007-483	Myrmicinae	Temnothorax	wettereri_sp_nov	w	pulchellus group	MMPC	Barbuda	Antigua & Barbuda	20m	0	0.487	0.186	0.568	0.521	0.221	0.6	0.142	0.105	0.162	0.626	0.235	0.19	0.279	0.18	0.118	0.206	0.153	0.203	0	0.356	0.139	0.204	0.133	0.145	0.315	0.47	0.114	0.04	0.821	0.1945	93.4741	23.6906	86.8333	120.154	26.6795	37.5399	236.842	182.353
CASENT0758675	JKW-2007-483	Myrmicinae	Temnothorax	wettereri_sp_nov	w	pulchellus group	UCDC	Barbuda	Antigua & Barbuda	20m	0	0.476	0.181	0.55	0.505	0.226	0.585	0.136	0.109	0.153	0.619	0.225	0.208	0.276	0.169	0.104	0.188	0.169	0.193	0	0.334	0.136	0.189	0.119	0.135	0.291	0.455	0.118	0.042	0.7975	0.1905	94.2574	23.8871	86.3248	122.574	26.9307	36.3489	244.538	163.314
CASENT0758813 (top)	ANTC43878	Myrmicinae	Temnothorax	wilsoni_sp_nov	m	pulchellus group		La Vega	Dominican Republic	2262	0	0.329	0.143	0.563	0.494	0.204	0.514	0.248	0.172	0.038	0.926	n/a	0.231	0.322	0.225	0.055	0.154	0.18	0.197	0	0.501	n/a	n/a	0.143	0.155	0.301	0.681	0.058	0.036	0.751	0.334	66.5992	44.474	96.1089	187.449	n/a	n/a	210.49	178.889
MCZENT00583610	SPCDR-53	Myrmicinae	Temnothorax	wilsoni_sp_nov	g	pulchellus group	MMPC	La Vega	Dominican Republic	2255	1	0.565	0.267	0.779	0.72	0.272	0.726	0.234	0.19	0.142	1.239	0.288	0.303	0.424	0.202	0.143	0.299	0.191	0.299	0	0.748	0.354	0.333	0.199	0.221	0.487	0.646	0.141	0.058	1.083	0.329	78.4722	30.3786	99.1736	172.083	49.1667	23.2446	244.724	221.99
CASENT0758813 (second from top)		Myrmicinae	Temnothorax	wilsoni_sp_nov	g	pulchellus group		La Vega	Dominican Republic	2262	1	0.559	0.268	0.772	0.704	0.271	0.707	0.239	0.175	0.135	1.212	0.306	0.285	0.433	0.213	0.142	0.294	0.211	0.322	0	0.838	0.356	0.367	0.207	0.234	0.535	0.654	0.135	0.052	1.0575	0.3265	79.4034	30.8747	99.5757	172.159	50.5682	25.2475	258.454	205.213
MCZENT00513358	LRD031203-8	Myrmicinae	Temnothorax	wilsoni_sp_nov	w	pulchellus group	MCZC	La Vega	Dominican Republic	2262	1	0.512	0.217	0.609	0.549	0.237	0.626	0.152	0.124	0.155	0.714	0.244	0.234	0.319	0.174	0.12	0.22	0.188	0.235	0	0.389	0.173	0.293	0.168	0.142	0.39	0.5	0.149	0.062	0.862	0.214	93.2605	24.826	87.6997	130.055	31.5118	34.1737	232.143	169.681
MCZENT00513365 (bottom)	LRD031203-4	Myrmicinae	Temnothorax	wilsoni_sp_nov	w	pulchellus group	MCZC	La Vega	Dominican Republic	2262	1	0.537	0.207	0.606	0.547	0.259	0.651	0.146	0.114	0.152	0.745	0.272	0.245	0.333	0.187	0.111	0.216	0.188	0.243	0	0.399	0.187	0.286	0.17	0.144	0.398	0.521	0.133	0.047	0.8725	0.203	98.1718	23.2665	84.0246	136.197	34.1865	36.5101	234.118	177.128
MCZENT00513365 (top)	LRD031203-4	Myrmicinae	Temnothorax	wilsoni_sp_nov	w	pulchellus group	MCZC	La Vega	Dominican Republic	2262	1	0.532	0.209	0.601	0.558	0.247	0.649	0.146	0.12	0.152	0.74	0.263	0.219	0.325	0.17	0.107	0.208	0.194	0.225	0	0.393	0.172	0.297	0.159	0.149	0.357	0.512	0.136	0.053	0.8825	0.206	95.3405	23.3428	85.9784	132.616	30.8244	35.5405	224.528	167.526
CASENT0758820	SPCDR-51	Myrmicinae	Temnothorax	wilsoni_sp_nov	w	pulchellus group	MMPC	La Vega	Dominican Republic	2255	1	0.498	0.203	0.559	0.512	0.234	0.613	0.155	0.117	0.146	0.705	0.24	0.228	0.306	0.187	0.111	0.204	0.209	0.233	0	0.377	0.163	0.271	0.15	0.122	0.362	0.481	0.125	0.048	0.8185	0.2135	97.2656	26.0843	83.5237	137.695	31.8359	34.0426	241.333	146.411
CASENT0758821	SPCDR-57	Myrmicinae	Temnothorax	wilsoni_sp_nov	w	pulchellus group	MMPC	La Vega	Dominican Republic	2255	1	0.472	0.202	0.58	0.521	0.245	0.615	0.142	0.115	0.134	0.716	0.237	0.227	0.3	0.169	0.112	0.205	0.187	0.22	0	0.374	0.164	0.294	0.154	0.119	0.354	0.474	0.127	0.049	0.8285	0.1995	90.595	24.0797	84.7154	137.428	31.4779	33.1006	229.87	160.428
MCZENT00583608 (bottom)	SPCDR-53	Myrmicinae	Temnothorax	wilsoni_sp_nov	w	pulchellus group	MMPC	La Vega	Dominican Republic	2255	1	0.514	0.217	0.604	0.563	0.253	0.646	0.158	0.121	0.139	0.729	0.281	0.224	0.311	0.175	0.109	0.21	0.187	0.229	0	0.399	0.172	0.288	0.155	0.144	0.374	0.518	0.146	0.05	0.886	0.2185	91.2966	24.6614	87.1517	129.485	30.5506	38.546	241.29	166.31
MCZENT00583608 (top)	SPCDR-53	Myrmicinae	Temnothorax	wilsoni_sp_nov	w	pulchellus group	MMPC	La Vega	Dominican Republic	2255	1	0.462	0.203	0.548	0.512	0.239	0.596	0.136	0.104	0.141	0.692	0.251	0.22	0.293	0.158	0.102	0.19	0.187	0.212	0	0.367	0.147	0.251	0.144	0.138	0.346	0.476	0.128	0.048	0.81	0.188	90.2344	23.2099	85.906	135.156	28.7109	36.2717	240.278	156.684
MCZENT00583609 (bottom)	SPCDR-53	Myrmicinae	Temnothorax	wilsoni_sp_nov	w	pulchellus group	MMPC	La Vega	Dominican Republic	2255	1	0.489	0.209	0.588	0.538	0.248	0.632	0.149	0.121	0.147	0.708	0.258	0.22	0.311	0.167	0.104	0.214	0.171	0.222	0	0.382	0.162	0.298	0.163	0.141	0.382	0.499	0.122	0.045	0.854	0.2095	90.8922	24.5316	85.1266	131.599	30.1115	36.4407	234.356	181.871
MCZENT00583609 (top)	SPCDR-53	Myrmicinae	Temnothorax	wilsoni_sp_nov	w	pulchellus group	MMPC	La Vega	Dominican Republic	2255	1	0.529	0.231	0.628	0.579	0.272	0.671	0.165	0.126	0.164	0.781	0.289	0.236	0.348	0.183	0.125	0.231	0.186	0.241	0	0.428	0.185	0.316	0.177	0.157	0.408	0.53	0.15	0.048	0.9145	0.228	91.3644	24.9317	86.2891	134.888	31.9516	37.0038	230.508	187.097
CASENT0758670	SPCDR-48	Myrmicinae	Temnothorax	wilsoni_sp_nov	w	pulchellus group	UCDC	La Vega	Dominican Republic	2255	0	0.509	0.231	0.625	0.579	0.273	0.657	0.15	0.133	0.147	0.779	0.226	0.274	0.333	0.177	0.112	0.214	0.18	0.245	0	0.424	0.185	0.277	0.166	0.149	0.385	0.526	0.14	0.054	0.9075	0.2165	87.9102	23.8567	88.1279	134.542	31.9516	29.0116	231.928	185
CASENT0758790	MMP02634	Myrmicinae	Temnothorax	aztecoides_sp_nov	m	salvini group	MMPC	Veracruz	Mexico	1080	0	0.227	0.086	0.686	0.556	0.249	0.597	0.262	0.2	0.068	1.206	n/a	0.312	0.406	0.234	0.07	0.183	0.203	0.236	0	0.777	n/a	n/a	0.176	n/a	0.271	1.004	0.095	0.056	0.8545	0.362	40.8273	42.364	93.1323	216.906	n/a	n/a	153.977	200
CASENT0733317	MMP01593	Myrmicinae	Temnothorax	aztecoides_sp_nov	g	salvini group	MMPC	Oaxaca	Mexico	1340	0	0.85	0.313	1.035	0.924	0.371	0.976	0.247	0.184	0.236	1.687	0.478	0.424	0.601	0.309	0.178	0.322	0.295	0.406	0	0.947	0.444	0.407	0.239	0.37	0.418	1.004	0.189	0.086	1.412	0.339	91.9913	24.0085	94.6721	182.576	48.0519	28.3343	174.895	203.729
CASENT0757144	MMP02638	Myrmicinae	Temnothorax	aztecoides_sp_nov	g	salvini group	MMPC	Veracruz	Mexico	1115	1	0.866	0.316	1.034	0.909	0.39	0.976	0.254	0.187	0.236	1.737	0.495	0.509	0.593	0.309	0.174	0.355	0.265	0.386	0	0.899	0.471	0.477	0.252	0.387	0.419	1.074	0.187	0.079	1.397	0.3475	95.2695	24.8747	93.1352	191.089	51.8152	28.4974	166.27	223.774
CASENT0758789	MMP02634	Myrmicinae	Temnothorax	aztecoides_sp_nov	g	salvini group	MMPC	Veracruz	Mexico	1080	0	0.923	0.354	1.081	0.963	0.408	1.045	0.274	0.194	0.249	1.839	0.456	0.445	0.629	0.35	0.231	0.41	0.323	0.455	0	1.029	0.52	0.493	0.271	0.471	0.49	1.162	0.201	0.084	1.4855	0.371	95.8463	24.9748	92.1531	190.966	53.9979	24.7961	180.812	194.737
CASENT0733318	MMP01593	Myrmicinae	Temnothorax	aztecoides_sp_nov	w	salvini group	MMPC	Oaxaca	Mexico	1340	0	0.849	0.275	0.891	0.792	0.345	0.913	0.208	0.171	0.22	1.263	0.451	0.347	0.49	0.29	0.149	0.273	0.231	0.283	0	0.592	0.27	0.326	0.194	0.312	0.316	0.995	0.203	0.075	1.2485	0.2935	107.197	23.5082	86.747	159.47	34.0909	35.7086	162.887	212.121
CASENT0733319	MMP01593	Myrmicinae	Temnothorax	aztecoides_sp_nov	w	salvini group	MMPC	Oaxaca	Mexico	1340	1	0.859	0.272	0.889	0.799	0.357	0.912	0.221	0.165	0.233	1.265	0.421	0.338	0.496	0.289	0.154	0.268	0.26	0.304	0	0.592	0.273	0.347	0.192	0.308	0.316	1.005	0.197	0.068	1.255	0.3035	107.509	24.1833	87.6096	158.323	34.1677	33.2806	164.583	190.769
CASENT0757137	MMP02633	Myrmicinae	Temnothorax	aztecoides_sp_nov	w	salvini group	MMPC	Veracruz	Mexico	1080	1	0.878	0.287	0.945	0.833	0.384	0.975	0.219	0.162	0.243	1.388	0.479	0.394	0.553	0.295	0.157	0.309	0.249	0.314	0	0.614	0.307	0.351	0.213	0.334	0.34	1.04	0.224	0.073	1.3205	0.3	105.402	22.7187	85.4359	166.627	36.8547	34.5101	159.624	222.088
CASENT0758785	MMP02649	Myrmicinae	Temnothorax	aztecoides_sp_nov	w	salvini group	MMPC	Veracruz	Mexico	1040	0	0.893	0.304	0.951	0.821	0.376	0.968	0.233	0.153	0.268	1.377	0.464	0.376	0.58	0.287	0.173	0.303	0.282	0.337	0	0.624	0.3	0.351	0.2	0.351	0.358	1.065	0.211	0.076	1.305	0.3095	108.77	23.7165	84.814	167.722	36.5408	33.6964	179	205.674
CASENT0758791	MMP02634	Myrmicinae	Temnothorax	aztecoides_sp_nov	w	salvini group	MMPC	Veracruz	Mexico	1080	0	0.905	0.305	0.973	0.852	0.395	0.98	0.227	0.168	0.241	1.361	0.46	0.377	0.511	0.29	0.175	0.301	0.25	0.313	0	0.618	0.292	0.342	0.208	0.343	0.338	1.044	0.212	0.069	1.342	0.311	106.221	23.1744	86.9388	159.742	34.2723	33.7987	162.5	204.4
CASENT0758792	MMP02634	Myrmicinae	Temnothorax	aztecoides_sp_nov	w	salvini group	MMPC	Veracruz	Mexico	1080	0	0.902	0.3	0.961	0.846	0.377	0.973	0.24	0.167	0.232	1.375	0.469	0.359	0.527	0.288	0.165	0.301	0.236	0.321	0	0.623	0.301	0.363	0.21	0.353	0.335	1.053	0.189	0.065	1.3325	0.3235	106.619	24.2777	86.9476	162.53	35.5792	34.1091	159.524	223.305
CASENT0758684	MMP02649	Myrmicinae	Temnothorax	aztecoides_sp_nov	w	salvini group	UCDC (MMPDNA#P173)	Veracruz	Mexico	1040	0	0.875	0.299	0.948	0.813	0.374	0.962	0.223	0.161	0.227	1.321	0.465	0.387	0.512	0.252	0.168	0.288	0.25	0.311	0	0.605	0.291	0.35	0.186	0.318	0.33	1.012	0.212	0.077	1.294	0.3035	107.626	23.4544	84.5114	162.485	35.7934	35.2006	177.419	204.8
CASENT0609756	DJC0142	Myrmicinae	Temnothorax	aztecus	m	salvini group	JTLC	Chiapas	Mexico	575m	0	0.186	0.109	0.6	0.473	0.206	0.514	0.246	0.179	0.056	0.951	n/a	0.255	0.334	0.205	0.06	0.15	0.157	0.183	0	0.587	n/a	n/a	0.144	0.138	0.224	0.858	0.095	0.048	0.73	0.3355	39.3235	45.9589	92.0233	201.057	n/a	n/a	155.556	212.739
CASENT0627698	Go-D-01-2-03	Myrmicinae	Temnothorax	aztecus	g	salvini group	JTLC	Matagalpa	Nicaragua	650m	0	0.757	0.311	0.912	0.803	0.332	0.859	0.25	0.184	0.205	1.556	0.386	0.419	0.589	0.344	0.185	0.349	0.267	0.383	0	0.857	0.44	0.383	0.225	0.315	0.394	0.913	0.191	0.064	1.2325	0.342	94.2715	27.7485	93.4808	193.773	54.7945	24.8072	175.111	220.599
JTLC000014408	Wa-A-06-2-18	Myrmicinae	Temnothorax	aztecus	g	salvini group	JTLC	Chiapas	Mexico	575m	0	0.756	0.293	0.923	0.814	0.348	0.915	0.247	0.182	0.237	1.609	0.431	0.426	0.579	0.338	0.202	0.364	0.269	0.386	0	0.864	0.412	0.419	0.239	0.388	0.376	0.947	0.188	0.071	1.2715	0.338	92.8747	26.5828	88.9617	197.666	50.6143	26.7868	157.322	215.242
CASENT0609755	DJC0142	Myrmicinae	Temnothorax	aztecus	w	salvini group	JTLC	Chiapas	Mexico	575m	1	0.721	0.237	0.789	0.698	0.304	0.795	0.185	0.138	0.206	1.089	0.415	0.313	0.441	0.251	0.157	0.257	0.201	0.244	0	0.503	0.226	0.289	0.149	0.297	0.25	0.799	0.19	0.06	1.0955	0.254	103.295	23.1858	87.7987	156.017	32.3782	38.1084	167.785	219.403
CASENT0610593	Ba-B-04-3-02-07	Myrmicinae	Temnothorax	aztecus	w	salvini group	JTLC	Izabal	Guatemala	440m	0	0.789	0.247	0.838	0.738	0.298	0.816	0.199	0.142	0.22	1.133	0.445	0.341	0.449	0.253	0.173	0.293	0.247	0.284	0	0.548	0.239	0.334	0.172	0.309	0.273	0.861	0.194	0.071	1.146	0.27	106.911	23.5602	90.4412	153.523	32.3848	39.2763	158.721	181.781
CASENT0611481	Wm-B-04-2-04	Myrmicinae	Temnothorax	aztecus	w	salvini group	JTLC	Izabal	Guatemala	410m	1	0.729	0.248	0.779	0.68	0.294	0.796	0.196	0.133	0.219	1.11	0.424	0.332	0.445	0.217	0.181	0.291	0.214	0.266	0	0.516	0.243	0.31	0.16	0.27	0.254	0.806	0.187	0.06	1.078	0.2625	107.206	24.3506	85.4271	163.235	35.7353	38.1982	158.75	207.944
CASENT0613028	Go-B-04-3-01	Myrmicinae	Temnothorax	aztecus	w	salvini group	JTLC	Izabal	Guatemala	440m	0	0.751	0.242	0.803	0.702	0.302	0.801	0.206	0.146	0.212	1.097	0.431	0.324	0.439	0.257	0.165	0.264	0.196	0.25	0	0.526	0.223	0.315	0.165	0.28	0.262	0.816	0.202	0.068	1.1025	0.279	106.98	25.3061	87.6404	156.268	31.7664	39.289	158.788	223.98
CASENT0615293	Wa-C-04-1-46	Myrmicinae	Temnothorax	aztecus	w	salvini group	JTLC	Comayagua	Honduras	1120m	0	0.749	0.262	0.794	0.709	0.297	0.803	0.203	0.148	0.218	1.117	0.396	0.331	0.435	0.252	0.152	0.266	0.202	0.25	0	0.518	0.231	0.295	0.162	0.281	0.247	0.807	0.198	0.057	1.1105	0.277	105.642	24.9437	88.2939	157.546	32.5811	35.4521	152.469	215.347
CASENT0618641	Wm-C-08-2-03	Myrmicinae	Temnothorax	aztecus	w	salvini group	JTLC	Atlántida	Honduras	550m	1	0.714	0.219	0.741	0.642	0.283	0.742	0.167	0.132	0.201	1.024	0.406	0.302	0.401	0.227	0.138	0.248	0.188	0.233	0	0.492	0.2	0.277	0.14	0.268	0.225	0.756	0.194	0.057	1.013	0.233	111.215	23.001	86.5229	159.502	31.1526	39.6484	160.714	213.298
CASENT0627684	Go-D-01-1-03	Myrmicinae	Temnothorax	aztecus	w	salvini group	JTLC	Matagalpa	Nicaragua	900m	1	0.739	0.257	0.804	0.705	0.303	0.805	0.21	0.146	0.201	1.121	0.394	0.323	0.441	0.26	0.147	0.253	0.219	0.248	0	0.521	0.228	0.293	0.165	0.271	0.247	0.812	0.198	0.062	1.1075	0.283	104.823	25.553	87.5776	159.007	32.3404	35.1472	149.697	201.37
CASENT0627800	Go-D-01-2-03	Myrmicinae	Temnothorax	aztecus	w	salvini group	JTLC	Matagalpa	Nicaragua	650m	1	0.777	0.258	0.835	0.728	0.298	0.825	0.222	0.161	0.199	1.168	0.39	0.333	0.449	0.251	0.154	0.258	0.208	0.255	0	0.546	0.242	0.3	0.165	0.266	0.258	0.849	0.198	0.06	1.1405	0.3025	106.731	26.5235	88.2424	160.44	33.2418	33.3904	156.364	215.865
CASENT0758793	DJC0142	Myrmicinae	Temnothorax	aztecus	w	salvini group	JTLC	Chiapas	Mexico	575m	0	0.74	0.243	0.811	0.705	0.292	0.788	0.183	0.133	0.208	1.072	0.393	0.316	0.435	0.254	0.153	0.254	0.204	0.249	0	0.521	0.218	0.279	0.153	0.301	0.248	0.808	0.19	0.058	1.099	0.2495	104.965	22.7025	89.467	152.057	30.922	36.6604	162.092	213.235
JTLC000014413	Wa-A-06-2-25	Myrmicinae	Temnothorax	aztecus	w	salvini group	JTLC	Chiapas	Mexico	575m	1	0.731	0.243	0.799	0.702	0.288	0.785	0.206	0.15	0.204	1.075	0.411	0.319	0.436	0.239	0.139	0.252	0.204	0.249	0	0.52	0.228	0.307	0.166	0.291	0.257	0.814	0.188	0.063	1.0945	0.281	104.131	25.6738	89.4268	153.134	32.4786	38.2326	154.819	213.725
LACMENT181956 (top)	ANTC43070	Myrmicinae	Temnothorax	aztecus	w	salvini group	LACM	Suchitepequez	Guatemala	930	0	0.725	0.244	0.788	0.672	0.278	0.761	0.195	0.14	0.203	1.066	0.363	0.302	0.397	0.243	0.145	0.266	0.207	0.237	0	0.515	0.211	0.261	0.161	0.27	0.248	0.788	0.178	0.047	1.0525	0.265	107.887	25.1781	88.3049	158.631	31.3988	34.0525	154.037	191.787
LACMENT181967 (top)	sk/435	Myrmicinae	Temnothorax	aztecus	w	salvini group	LACM	Veracruz	Mexico	900m	0	0.711	0.24	0.782	0.685	0.289	0.772	0.196	0.145	0.198	1.111	0.363	0.348	0.44	0.255	0.148	0.268	0.214	0.242	0	0.547	0.189	0.305	0.163	0.265	0.256	0.852	0.177	0.061	1.071	0.2685	103.796	25.07	88.7306	162.19	27.5912	32.6733	157.055	205.607
LACMENT323181 (top)	sk/435	Myrmicinae	Temnothorax	aztecus	w	salvini group	LACM	Veracruz	Mexico	900m	0	0.706	0.235	0.79	0.686	0.296	0.792	0.207	0.141	0.194	1.06	0.367	0.288	0.422	0.217	0.144	0.251	0.196	0.245	0	0.502	0.22	0.292	0.155	0.269	0.245	0.825	0.182	0.054	1.082	0.2775	102.915	25.647	86.6162	154.519	32.07	34.6226	158.065	215.306
CASENT0733469	MMP01643	Myrmicinae	Temnothorax	aztecus	w	salvini group	MMPC	Veracruz	Mexico	450	0	0.753	0.25	0.803	0.718	0.317	0.825	0.198	0.148	0.188	1.137	0.359	0.323	0.462	0.239	0.152	0.266	0.204	0.256	0	0.528	0.231	0.296	0.164	0.288	0.261	0.859	0.188	0.056	1.1305	0.272	104.875	24.0602	87.0303	158.357	32.1727	31.5743	159.146	226.471
CASENT0733501	MMP01650	Myrmicinae	Temnothorax	aztecus	w	salvini group	MMPC	Veracruz	Mexico	280	0	0.734	0.242	0.795	0.695	0.308	0.8	0.183	0.135	0.205	1.07	0.365	0.324	0.44	0.234	0.151	0.248	0.196	0.239	0	0.501	0.221	0.277	0.155	0.279	0.258	0.813	0.191	0.066	1.095	0.2505	105.612	22.8767	86.875	153.957	31.7986	34.1121	166.452	224.49
CASENT0732561	Go-D-01-2-03	Myrmicinae	Temnothorax	aztecus	w	salvini group	UCDC (MMPDNA#P048)	Matagalpa	Nicaragua	650m	1	0.79	0.258	0.838	0.735	0.31	0.83	0.225	0.148	0.209	1.157	0.416	0.333	0.464	0.263	0.151	0.269	0.226	0.255	0	0.541	0.24	0.302	0.168	0.279	0.275	0.855	0.202	0.061	1.15	0.299	107.483	26	88.5542	157.415	32.6531	35.9551	163.69	205.31
CASENT0758691	DJC0142	Myrmicinae	Temnothorax	aztecus	w	salvini group	UCDC (MMPDNA#P189)	Chiapas	Mexico	575m	0	0.757	0.247	0.821	0.712	0.306	0.813	0.208	0.134	0.197	1.108	0.41	0.307	0.456	0.25	0.163	0.267	0.223	0.246	0	0.53	0.24	0.297	0.166	0.297	0.259	0.833	0.198	0.069	1.1185	0.275	106.32	24.5865	87.5769	155.618	33.7079	37.0036	156.024	204.484
CASENT0758692	Go-B-04-3-04	Myrmicinae	Temnothorax	aztecus	w	salvini group	UCDC (MMPDNA#P190)	Izabal	Guatemala	530m	0	0.759	0.262	0.812	0.703	0.309	0.808	0.215	0.158	0.201	1.129	0.479	0.352	0.441	0.229	0.164	0.277	0.223	0.256	0	0.534	0.226	0.333	0.148	0.288	0.248	0.822	0.191	0.063	1.107	0.294	107.966	26.5583	87.005	160.597	32.1479	42.4269	167.568	197.758
CASENT0758693	Wa-C-04-1-49	Myrmicinae	Temnothorax	aztecus	w	salvini group	UCDC (MMPDNA#P191)	Comayagua	Honduras	1120m	0	0.731	0.248	0.789	0.689	0.307	0.787	0.209	0.154	0.205	1.077	0.377	0.31	0.425	0.233	0.156	0.249	0.204	0.23	0	0.502	0.219	0.255	0.156	0.258	0.244	0.783	0.181	0.059	1.0825	0.286	106.096	26.4203	87.5476	156.313	31.7852	35.0046	156.41	208.333
CASENT0614827	PWK2007-09	Myrmicinae	Temnothorax	aztecus	w	salvini group	UCDC (MMPDNA#P192)	Cayo	Belize	1000m	0	0.798	0.256	0.829	0.722	0.328	0.831	0.209	0.146	0.207	1.164	0.475	0.33	0.452	0.282	0.174	0.285	0.23	0.282	0	0.539	0.223	0.282	0.154	0.296	0.256	0.897	0.189	0.065	1.1375	0.282	110.526	24.7912	86.8833	161.219	30.8864	40.8076	166.234	196.522
JTLC000010282 (bottom)	JTL6078	Myrmicinae	Temnothorax	fortispinosus_sp_nov	g	salvini group	JTLC	Chiapas	Mexico	1740m	0	0.901	0.355	1.121	1.037	0.44	1.077	0.298	0.219	0.205	1.804	0.479	0.471	0.61	0.326	0.265	0.461	0.286	0.448	0	0.984	0.504	0.487	0.261	0.357	0.442	1.057	0.211	0.08	1.5755	0.4075	86.8852	25.8648	96.286	173.963	48.6017	26.5521	169.349	213.287
CASENT0601966	RSA2007-021	Myrmicinae	Temnothorax	fortispinosus_sp_nov	w	salvini group	JTLC	Chiapas	Mexico	1650m	0	0.869	0.291	0.959	0.863	0.377	0.944	0.224	0.154	0.218	1.238	0.352	0.346	0.486	0.263	0.193	0.314	0.229	0.292	0	0.584	0.243	0.291	0.185	0.24	0.302	0.953	0.182	0.065	1.335	0.301	100.695	22.5468	91.4195	143.453	28.1576	28.433	163.243	212.227
JTLC000010282 (top)	JTL6078	Myrmicinae	Temnothorax	fortispinosus_sp_nov	w	salvini group	JTLC	Chiapas	Mexico	1740m	1	0.881	0.282	0.959	0.877	0.366	0.971	0.233	0.183	0.209	1.271	0.336	0.367	0.484	0.284	0.178	0.306	0.225	0.286	0	0.612	0.267	0.283	0.195	0.256	0.304	0.988	0.204	0.07	1.3625	0.3245	100.456	23.8165	90.3193	144.926	30.4447	26.4359	155.897	215.111
JTLC000014251	Ba-A-02-3-04-06	Myrmicinae	Temnothorax	fortispinosus_sp_nov	w	salvini group	JTLC	Chiapas	Mexico	1610m	0	0.815	0.289	0.916	0.819	0.352	0.925	0.212	0.163	0.205	1.204	0.301	0.349	0.435	0.261	0.167	0.3	0.239	0.286	0	0.56	0.248	0.273	0.178	0.227	0.279	0.93	0.176	0.062	1.2815	0.2935	99.5116	22.9028	88.5405	147.009	30.2808	25	156.742	182.008
CASENT0758699	Wa-A-02-1-23	Myrmicinae	Temnothorax	fortispinosus_sp_nov	w	salvini group	JTLC (MMPDNA#P198)	Chiapas	Mexico	1520m	0	0.863	0.296	0.974	0.873	0.377	0.96	0.242	0.171	0.214	1.263	0.323	0.382	0.466	0.247	0.172	0.316	0.247	0.312	0	0.601	0.264	0.277	0.183	0.255	0.306	0.958	0.199	0.065	1.353	0.3275	98.8545	24.2055	90.9375	144.674	30.2405	25.574	167.213	188.664
LACMENT323459	ANTC43759	Myrmicinae	Temnothorax	fortispinosus_sp_nov	w	salvini group	LACM	Chiapas	Mexico		0	0.878	0.281	0.934	0.82	0.344	0.921	0.236	0.152	0.208	1.25	0.303	0.36	0.453	0.276	0.176	0.31	0.228	0.303	0	0.583	0.261	0.26	0.183	0.218	0.294	0.935	0.187	0.067	1.2805	0.312	107.073	24.3655	89.0337	152.439	31.8293	24.24	160.656	198.684
CASENT0615221	Pollet12818	Myrmicinae	Temnothorax	longicaulis_stat_nov_nom_nov	w	salvini group	JTLC	Puntarenas	Costa Rica	1200m	0	0.801	0.276	0.892	0.785	0.32	0.882	0.23	0.163	0.235	1.207	0.377	0.36	0.471	0.279	0.152	0.282	0.251	0.277	0	0.563	0.22	0.283	0.182	0.305	0.292	0.94	0.189	0.07	1.226	0.3115	102.038	25.4078	89.0023	153.758	28.0255	31.2345	160.44	187.649
CASENT0010847 (top)	PSW10571	Myrmicinae	Temnothorax	longicaulis_stat_nov_nom_nov	w	salvini group	PSWC	Puntarenas	Costa Rica	1200m	1	0.8	0.286	0.881	0.765	0.322	0.878	0.226	0.149	0.218	1.18	0.378	0.348	0.463	0.288	0.159	0.275	0.25	0.28	0	0.563	0.233	0.323	0.18	0.334	0.31	0.948	0.199	0.068	1.204	0.3005	104.575	24.9585	87.1298	154.248	30.4575	32.0339	172.222	185.2
CASENT0758334 (top)	PSW10564-2	Myrmicinae	Temnothorax	longicaulis_stat_nov_nom_nov	w	salvini group	PSWC	Puntarenas	Costa Rica	1200m	1	0.795	0.308	0.903	0.784	0.324	0.889	0.231	0.158	0.211	1.218	0.396	0.361	0.467	0.267	0.158	0.279	0.261	0.278	0	0.556	0.2	0.298	0.179	0.294	0.304	0.953	0.198	0.073	1.2285	0.31	101.403	25.234	88.189	155.357	25.5102	32.5123	169.832	178.927
CASENT0758335	PSW10658-2	Myrmicinae	Temnothorax	longicaulis_stat_nov_nom_nov	w	salvini group	PSWC	Puntarenas	Costa Rica	1200m	1	0.737	0.257	0.805	0.714	0.316	0.824	0.21	0.136	0.204	1.081	0.34	0.332	0.391	0.259	0.129	0.249	0.208	0.244	0	0.51	0.207	0.257	0.156	0.266	0.257	0.858	0.18	0.054	1.126	0.278	103.221	24.6892	86.6505	151.401	28.9916	31.4524	164.744	187.981
CASENT0758671	PSW17398-23	Myrmicinae	Temnothorax	longicaulis_stat_nov_nom_nov	w	salvini group	UCDC (MMPDNA#P160)	San José	Costa Rica	950	0	0.804	0.287	0.87	0.778	0.33	0.878	0.233	0.154	0.199	1.217	0.415	0.351	0.48	0.291	0.157	0.285	0.239	0.264	0	0.563	0.223	0.269	0.171	0.33	0.284	0.94	0.199	0.067	1.217	0.31	103.342	25.4725	88.6105	156.427	28.6632	34.1002	166.082	200.837
CASENT0758740	Go-E-06-1-01	Myrmicinae	Temnothorax	longicaulis_stat_nov_nom_nov	w	salvini group	UCDC (MMPDNA#P287)	San José	Costa Rica	970	0	0.845	0.3	0.9	0.783	0.34	0.897	0.227	0.16	0.198	1.231	0.433	0.376	0.505	0.27	0.167	0.281	0.235	0.281	0	0.59	0.217	0.339	0.17	0.317	0.291	0.997	0.203	0.073	1.2315	0.307	107.918	24.9289	87.291	157.216	27.7139	35.1747	171.176	214.894
CASENT0619355	JTL7413	Myrmicinae	Temnothorax	longinoi_sp_nov	m	salvini group	JTLC	Nueva Segovia	Nicaragua	1860m	0	0.248	0.143	0.753	0.609	0.255	0.617	0.303	0.218	0.053	1.268	n/a	0.318	0.428	0.249	0.078	0.192	0.21	0.24	0	0.774	n/a	n/a	0.172	n/a	0.268	1.032	0.109	0.06	0.9175	0.412	40.7225	44.9046	98.7034	208.21	n/a	n/a	155.814	203.81
CASENT0619354	JTL7413	Myrmicinae	Temnothorax	longinoi_sp_nov	g	salvini group	JTLC	Nueva Segovia	Nicaragua	1860m	1	0.819	0.298	1.001	0.873	0.326	0.917	0.271	0.199	0.21	1.704	0.343	0.44	0.598	0.333	0.208	0.395	0.292	0.439	0	1.006	0.447	0.401	0.238	n/a	0.515	1.043	0.187	0.077	1.3315	0.3705	93.8144	27.8258	95.2017	195.189	51.2027	20.1291	216.387	204.795
CASENT0758354 (top)	PSW16337	Myrmicinae	Temnothorax	longinoi_sp_nov	g	salvini group	PSWC	Olancho	Honduras	1550m	1	0.77	0.291	0.974	0.879	0.348	0.907	0.281	0.205	0.212	1.646	0.377	0.424	0.541	0.304	0.204	0.353	0.281	0.417	0	0.922	0.43	0.429	0.24	n/a	0.412	1.033	0.181	0.063	1.3325	0.3835	87.5995	28.7805	96.9129	187.258	48.9192	22.904	171.667	192.527
CASENT0740648	ANTC29709	Myrmicinae	Temnothorax	longinoi_sp_nov	w	salvini group	CASC	Chiriqui	Panama	1700m	0	0.738	0.254	0.795	0.703	0.314	0.834	0.207	0.158	0.216	1.059	0.295	0.306	0.383	0.234	0.118	0.265	0.231	0.276	0	0.498	0.204	0.241	0.166	0.234	0.292	0.808	0.172	0.054	1.12	0.286	104.979	25.5357	84.2926	150.64	29.0185	27.8565	175.904	165.801
CASENT0611710	RSA2009-030	Myrmicinae	Temnothorax	longinoi_sp_nov	w	salvini group	JTLC	Francisco Morazán	Honduras	1500m	1	0.84	0.272	0.873	0.774	0.341	0.882	0.225	0.16	0.198	1.202	0.307	0.353	0.432	0.261	0.155	0.279	0.215	0.268	0	0.56	0.23	0.276	0.172	0.263	0.28	0.961	0.189	0.058	1.215	0.305	108.527	25.1029	87.7551	155.297	29.7158	25.5408	162.791	200.93
CASENT0614144	Go-C-02-1-02	Myrmicinae	Temnothorax	longinoi_sp_nov	w	salvini group	JTLC	Olancho	Honduras	1670m	1	0.788	0.272	0.871	0.776	0.34	0.872	0.232	0.157	0.21	1.149	0.341	0.328	0.425	0.27	0.159	0.269	0.213	0.281	0	0.56	0.226	0.269	0.175	0.258	0.281	0.907	0.18	0.062	1.212	0.3105	101.546	25.6188	88.9908	148.067	29.1237	29.678	160.571	199.531
CASENT0614501	Go-B-03-1-03	Myrmicinae	Temnothorax	longinoi_sp_nov	w	salvini group	JTLC	Zacapa	Guatemala	1550m	0	0.765	0.255	0.804	0.712	0.313	0.782	0.189	0.146	0.181	1.012	0.267	0.293	0.359	0.217	0.132	0.23	0.185	0.223	0	0.469	0.18	0.216	0.145	0.208	0.234	0.836	0.16	0.05	1.103	0.262	107.444	23.7534	91.0486	142.135	25.2809	26.3834	161.379	194.054
CASENT0614503	Go-B-03-2-05	Myrmicinae	Temnothorax	longinoi_sp_nov	w	salvini group	JTLC	Zacapa	Guatemala	1430m	0	0.863	0.278	0.925	0.823	0.358	0.927	0.233	0.162	0.208	1.216	0.346	0.34	0.477	0.252	0.174	0.296	0.23	0.272	0	0.572	0.235	0.284	0.182	0.264	0.302	0.999	0.184	0.065	1.2865	0.314	104.86	24.4073	88.781	147.752	28.5541	28.4539	165.934	207.391
CASENT0758695	Go-B-03-2-05	Myrmicinae	Temnothorax	longinoi_sp_nov	w	salvini group	JTLC (MMPDNA#P194)	Zacapa	Guatemala	1430m	0	0.852	0.261	0.892	0.799	0.347	0.894	0.228	0.161	0.205	1.156	0.355	0.329	0.435	0.275	0.175	0.276	0.223	0.276	0	0.543	0.231	0.259	0.176	0.258	0.281	0.975	0.19	0.067	1.246	0.3085	106.633	24.7592	89.3736	144.681	28.9111	30.7093	159.659	195.067
CASENT0758696	Go-C-01-3-03	Myrmicinae	Temnothorax	longinoi_sp_nov	w	salvini group	JTLC (MMPDNA#P195)	Olancho	Honduras	1630m	0	0.827	0.278	0.903	0.805	0.325	0.884	0.232	0.16	0.178	1.19	0.325	0.318	0.444	0.261	0.156	0.259	0.234	0.285	0	0.561	0.264	0.302	0.188	0.28	0.318	0.943	0.186	0.071	1.247	0.312	102.733	25.02	91.0633	147.826	32.795	27.3109	169.149	189.744
CASENT0615331	Wa-C-03-1-03	Myrmicinae	Temnothorax	longinoi_sp_nov	w	salvini group	JTLC (MMPDNA#P199)	Comayagua	Honduras	2000m	1	0.869	0.269	0.905	0.799	0.353	0.918	0.236	0.167	0.212	1.227	0.347	0.346	0.447	0.248	0.178	0.282	0.212	0.284	0	0.565	0.244	0.249	0.18	0.267	0.307	0.997	0.185	0.061	1.258	0.3195	108.761	25.3975	87.037	153.567	30.5382	28.2804	170.556	210.849
LACMENT323458	ANTC43761	Myrmicinae	Temnothorax	longinoi_sp_nov	w	salvini group	LACM	Tegucigalpa	Honduras	1770m	1	0.828	0.278	0.895	0.805	0.336	0.879	0.232	0.169	0.209	1.171	0.34	0.318	0.446	0.28	0.163	0.273	0.241	0.285	0	0.556	0.24	0.285	0.171	0.253	0.273	0.96	0.198	0.07	1.2445	0.3165	102.857	25.4319	91.5813	145.466	29.8137	29.035	159.649	185.062
CASENT0758353	PSW16329-03 (top)	Myrmicinae	Temnothorax	longinoi_sp_nov	w	salvini group	PSWC	Olancho	Honduras	1470m	1	0.772	0.269	0.863	0.776	0.314	0.841	0.228	0.154	0.198	1.139	0.343	0.341	0.427	0.262	0.158	0.263	0.227	0.275	0	0.551	0.236	0.29	0.182	0.271	0.292	0.894	0.165	0.061	1.1965	0.305	99.4845	25.491	92.2711	146.778	30.4124	30.1141	160.44	188.106
CASENT0758354 (middle)	PSW16337	Myrmicinae	Temnothorax	longinoi_sp_nov	w	salvini group	PSWC	Olancho	Honduras	1550m	0	0.784	0.276	0.861	0.774	0.325	0.847	0.244	0.15	0.193	1.134	0.3	0.324	0.426	0.257	0.159	0.274	0.22	0.265	0	0.529	0.223	0.253	0.18	0.275	0.273	0.907	0.181	0.064	1.1975	0.319	101.292	26.6388	91.3813	146.512	28.8114	26.455	151.667	193.636
CASENT0915982	PSW16326-2	Myrmicinae	Temnothorax	longinoi_sp_nov	w	salvini group	PSWC	Olancho	Honduras	1450m	0	0.846	0.276	0.91	0.83	0.343	0.884	0.237	0.144	0.197	1.202	0.347	0.341	0.466	0.291	0.159	0.274	0.233	0.28	0	0.569	0.209	0.275	0.184	0.278	0.3	0.941	0.191	0.065	1.272	0.309	101.928	24.2925	93.8914	144.819	25.1807	28.8686	163.043	200
CASENT0758331	PSW16325	Myrmicinae	Temnothorax	longinoi_sp_nov	w	salvini group	UCDC	Olancho	Honduras	1450m	1	0.747	0.247	0.831	0.744	0.31	0.826	0.221	0.142	0.18	1.087	0.309	0.326	0.42	0.264	0.141	0.244	0.194	0.242	0	0.519	0.216	0.268	0.165	0.244	0.271	0.846	0.169	0.059	1.157	0.292	100.403	25.2377	90.0726	146.102	29.0323	28.4269	164.242	216.495
CASENT0758332 (top)	PSW16337	Myrmicinae	Temnothorax	longinoi_sp_nov	w	salvini group	UCDC	Olancho	Honduras	1640m	1	0.823	0.273	0.901	0.813	0.333	0.908	0.235	0.167	0.192	1.196	0.333	0.354	0.442	0.262	0.165	0.282	0.215	0.287	0	0.563	0.248	0.286	0.193	0.288	0.301	0.97	0.191	0.064	1.267	0.3185	101.23	25.1381	89.5374	147.109	30.5043	27.8428	155.959	205.581
CASENT0732601	Go-D-06-1-01	Myrmicinae	Temnothorax	longinoi_sp_nov	w	salvini group	UCDC (MMPDNA#P050)	Jinotega	Nicaragua	1500m	0	0.795	0.268	0.857	0.76	0.335	0.859	0.228	0.165	0.205	1.14	0.305	0.31	0.418	0.257	0.149	0.264	0.227	0.283	0	0.541	0.22	0.242	0.176	0.258	0.277	0.925	0.186	0.064	1.1895	0.3105	104.605	26.1034	88.475	150	28.9474	26.7544	157.386	184.141
CASENT0632189	Go-E-05-1-01	Myrmicinae	Temnothorax	longinoi_sp_nov	w	salvini group	University of Costa Rica	San Jose	Costa Rica	1510m	1	0.811	0.27	0.866	0.795	0.359	0.912	0.22	0.155	0.203	1.177	0.328	0.35	0.432	0.247	0.153	0.276	0.226	0.293	0	0.551	0.187	0.244	0.187	0.271	0.309	0.937	0.184	0.062	1.251	0.2975	102.013	23.781	87.1711	148.05	23.522	27.8675	165.241	191.15
CASENT0614500	Go-B-03-1-01	Myrmicinae	Temnothorax	paraztecus_mmp_sp_nov	intercaste	salvini group	JTLC	Zacapa	Guatemala	1540m	0	0.691	0.236	0.813	0.709	0.311	0.803	0.197	0.151	0.184	1.151	0.251	0.318	0.447	0.227	0.149	0.272	0.224	0.285	0	0.522	0.276	0.293	0.175	0.305	0.292	0.865	0.163	0.065	1.1105	0.2725	97.4612	24.5385	88.2939	162.341	38.9281	21.8071	166.857	199.554
CASENT0629030	Go-D-03-3-03	Myrmicinae	Temnothorax	paraztecus_mmp_sp_nov	w	salvini group	JTLC	Jinotega	Nicaragua	1110m	0	0.715	0.233	0.786	0.69	0.302	0.787	0.187	0.146	0.198	1.078	0.299	0.302	0.413	0.234	0.128	0.248	0.189	0.238	0	0.511	0.208	0.218	0.156	0.285	0.247	0.822	0.19	0.059	1.0835	0.26	103.623	23.9963	87.6747	156.232	30.1449	27.7365	158.333	218.519
CASENT0758802	Go-D-03-3-03	Myrmicinae	Temnothorax	paraztecus_mmp_sp_nov	w	salvini group	JTLC	Jinotega	Nicaragua	1110m	0	0.746	0.237	0.826	0.741	0.313	0.795	0.202	0.142	0.203	1.105	0.285	0.315	0.426	0.271	0.144	0.268	0.195	0.262	0	0.527	0.237	0.25	0.172	0.299	0.264	0.827	0.198	0.066	1.1385	0.273	100.675	23.9789	93.2075	149.123	31.9838	25.7919	153.488	218.462
CASENT0629031	Go-D-03-3-03	Myrmicinae	Temnothorax	paraztecus_mmp_sp_nov	w	salvini group	JTLC	Jinotega	Nicaragua	1110m	0	0.758	0.24	0.834	0.754	0.323	0.831	0.19	0.133	0.198	1.096	0.311	0.319	0.426	0.268	0.147	0.268	0.229	0.267	0	0.529	0.233	0.252	0.178	0.308	0.271	0.863	0.206	0.067	1.1695	0.2565	100.531	21.9324	90.7341	145.358	30.9019	28.3759	152.247	186.026
CASENT0614499	Go-B-03-1-01	Myrmicinae	Temnothorax	paraztecus_mmp_sp_nov_nr	w	salvini group	JTLC	Zacapa	Guatemala	1540m	0	0.725	0.256	0.845	0.725	0.319	0.831	0.205	0.133	0.218	1.15	0.349	0.312	0.447	0.25	0.159	0.294	0.229	0.29	0	0.526	0.239	0.292	0.179	0.308	0.276	0.831	0.19	0.065	1.1405	0.2715	100	23.8053	87.2443	158.621	32.9655	30.3478	154.19	195.197
CASENT0612665	JTL6717	Myrmicinae	Temnothorax	parvidentatus_sp_nov	g	salvini group	JTLC	Suchitepéquez	Guatemala	1570m	1	0.828	0.307	0.976	0.873	0.348	0.923	0.258	0.175	0.231	1.652	0.407	0.408	0.595	0.283	0.201	0.374	0.27	0.374	0	0.95	0.442	0.412	0.248	0.363	0.394	1.033	0.177	0.069	1.3345	0.3455	94.8454	25.8898	94.5829	189.233	50.63	24.6368	158.871	220.37
CASENT0610699	Go-B-09-1-01	Myrmicinae	Temnothorax	parvidentatus_sp_nov	w	salvini group	JTLC	Suchitepéquez	Guatemala	1625m	0	0.73	0.225	0.756	0.672	0.311	0.779	0.179	0.131	0.205	1.001	0.269	0.3	0.368	0.213	0.12	0.23	0.199	0.201	0	0.466	0.2	0.225	0.142	0.21	0.229	0.804	0.151	0.061	1.0615	0.2445	108.631	23.0334	86.2644	148.958	29.7619	26.8731	161.268	184.925
CASENT0756087	JTL6717	Myrmicinae	Temnothorax	parvidentatus_sp_nov	w	salvini group	JTLC	Suchitepéquez	Guatemala	1570m	1	0.815	0.265	0.893	0.79	0.339	0.888	0.211	0.147	0.213	1.169	0.363	0.365	0.438	0.252	0.167	0.282	0.226	0.286	0	0.572	0.263	0.303	0.186	0.28	0.308	0.931	0.167	0.061	1.234	0.2845	103.165	23.0551	88.964	147.975	33.2911	31.0522	165.591	193.805
CASENT0758786	JTL6715	Myrmicinae	Temnothorax	parvidentatus_sp_nov	w	salvini group	JTLC	Suchitepéquez	Guatemala	1580m	0	0.779	0.282	0.906	0.807	0.341	0.892	0.23	0.165	0.222	1.18	0.344	0.339	0.457	0.228	0.165	0.295	0.251	0.27	0	0.56	0.253	0.273	0.179	0.252	0.294	0.913	0.175	0.069	1.253	0.3125	96.5304	24.9401	90.4709	146.221	31.3507	29.1525	164.246	182.072
CASENT0758698	JTL6715	Myrmicinae	Temnothorax	parvidentatus_sp_nov	w	salvini group	JTLC (MMPDNA#P197)	Suchitepéquez	Guatemala	1580m	0	0.811	0.279	0.89	0.779	0.33	0.884	0.228	0.167	0.22	1.177	0.327	0.349	0.499	0.233	0.157	0.268	0.226	0.266	0	0.564	0.245	0.268	0.169	0.244	0.279	0.925	0.17	0.06	1.221	0.3115	104.108	25.5119	88.1222	151.091	31.4506	27.7825	165.089	220.796
LACMENT323431	ANTC43758	Myrmicinae	Temnothorax	parvidentatus_sp_nov	w	salvini group	LACM		Guatemala		1	0.821	0.254	0.866	0.768	0.33	0.868	0.207	0.152	0.256	1.154	0.343	0.335	0.429	0.229	0.16	0.272	0.243	0.27	0	0.55	0.241	0.299	0.161	0.238	0.287	0.906	0.18	0.076	1.202	0.283	106.901	23.5441	88.4793	150.26	31.3802	29.7227	178.261	176.543
LACMENT323432	ANTC43758	Myrmicinae	Temnothorax	parvidentatus_sp_nov	w	salvini group	LACM		Guatemala		1	0.807	0.25	0.838	0.743	0.326	0.847	0.208	0.154	0.232	1.109	0.316	0.318	0.407	0.238	0.149	0.259	0.224	0.245	0	0.513	0.227	0.243	0.16	0.232	0.278	0.857	0.175	0.066	1.1665	0.285	108.614	24.4321	87.7214	149.26	30.5518	28.4941	173.75	181.696
CASENT0614495	Go-B-02-4-03	Myrmicinae	Temnothorax	quetzal_sp_nov	w	salvini group	JTLC	Baja Verapaz	Guatemala	1925m	0	0.973	0.298	1.002	0.905	0.381	1.018	0.255	0.167	0.249	1.367	0.439	0.404	0.527	0.303	0.209	0.348	0.256	0.317	0	0.618	0.264	0.451	0.212	0.299	0.332	1.187	0.195	0.075	1.414	0.3385	107.514	23.9392	88.8998	151.05	29.1713	32.1141	156.604	205.859
CASENT0614496	Go-B-02-4-03	Myrmicinae	Temnothorax	quetzal_sp_nov	w	salvini group	UCDC (MMPDNA#P193)	Baja Verapaz	Guatemala	1925m	0	0.978	0.291	1	0.883	0.371	0.999	0.232	0.167	0.256	1.375	0.45	0.386	0.52	0.29	0.18	0.335	0.271	0.291	0	0.595	0.256	0.368	0.202	0.295	0.322	1.201	0.202	0.078	1.3825	0.3155	110.759	22.821	88.3884	155.719	28.9921	32.7273	159.406	191.882
JTLC000001501 (bottom)	JTL4660	Myrmicinae	Temnothorax	salvini	g	salvini group	JTLC	Heredia	Costa Rica	2000m	1	0.892	0.333	1.083	0.975	0.41	1.079	0.297	0.208	0.221	1.738	0.406	0.435	0.556	0.329	0.199	0.4	0.296	0.43	0	0.925	0.386	0.388	0.282	0.303	0.471	1.157	0.205	0.07	1.5145	0.401	91.4872	26.4774	90.3614	178.256	39.5897	23.3602	167.021	187.838
CASENT0756074	JTL4660	Myrmicinae	Temnothorax	salvini	w	salvini group	JTLC	Heredia	Costa Rica	2000m	1	0.856	0.3	0.931	0.842	0.386	0.987	0.237	0.178	0.227	1.329	0.354	0.376	0.46	0.294	0.17	0.32	0.291	0.338	0	0.601	0.233	0.308	0.206	0.267	0.352	1.007	0.209	0.072	1.3355	0.326	101.663	24.4103	85.309	157.838	27.6722	26.6366	170.874	158.076
CASENT0758295	JTL4659	Myrmicinae	Temnothorax	salvini	w	salvini group	JTLC	Heredia	Costa Rica	2000m	1	0.892	0.322	0.999	0.888	0.4	1.047	0.25	0.167	0.252	1.349	0.319	0.364	0.443	0.279	0.142	0.306	0.249	0.328	0	0.627	0.211	0.247	0.209	0.22	0.333	1.035	0.22	0.064	1.4115	0.3335	100.45	23.6273	84.8138	151.914	23.7613	23.6471	159.33	177.912
JTLC000001501 (top)	JTL4660	Myrmicinae	Temnothorax	salvini	w	salvini group	JTLC	Heredia	Costa Rica	2000m	1	0.891	0.316	0.994	0.879	0.428	1.045	0.245	0.184	0.228	1.36	0.361	0.388	0.454	0.272	0.167	0.325	0.245	0.331	0	0.629	0.254	0.27	0.232	0.24	0.368	1.024	0.216	0.079	1.4015	0.337	101.365	24.0457	84.1148	154.721	28.8965	26.5441	158.621	185.306
CASENT0758697	JTL4659	Myrmicinae	Temnothorax	salvini	w	salvini group	JTLC (MMPDNA#P196)	Heredia	Costa Rica	2000m	1	0.909	0.318	1.002	0.905	0.425	1.067	0.246	0.171	0.246	1.376	0.322	0.405	0.462	0.283	0.148	0.311	0.266	0.318	0	0.648	0.195	0.324	0.223	0.225	0.349	1.062	0.219	0.077	1.4385	0.3315	100.442	23.0448	84.8172	152.044	21.547	23.4012	156.502	173.684
CASENT0740647	ANTC29708	Myrmicinae	Temnothorax	salvini	g	salvini group	CASC	Chiriqui	Panama	1700m	0	0.831	0.32	1.029	0.907	0.361	1.005	0.286	0.191	0.209	1.641	0.404	0.423	0.525	0.314	0.201	0.377	0.286	0.368	0	0.885	0.408	0.426	0.27	0.32	0.397	1.051	0.187	0.082	1.4095	0.3815	91.6207	27.0663	90.2488	180.926	44.9835	24.6191	147.037	183.566
LACMENT323466 (middle)	ANTC43760	Myrmicinae	Temnothorax	salvini	w	salvini group	LACM	Cartago	Costa Rica	2360m	0	0.801	0.258	0.836	0.735	0.349	0.901	0.199	0.152	0.204	1.124	0.311	0.324	0.398	0.222	0.144	0.262	0.195	0.244	0	0.487	0.179	0.259	0.166	0.205	0.263	0.855	0.177	0.062	1.1855	0.275	108.98	23.197	81.576	152.925	24.3537	27.669	158.434	204.103
LACMENT323466 (top)	ANTC43760	Myrmicinae	Temnothorax	salvini	w	salvini group	LACM	Cartago	Costa Rica	2360m	0	0.862	0.322	0.978	0.861	0.373	0.978	0.237	0.156	0.222	1.257	0.355	0.372	0.462	0.245	0.166	0.306	0.245	0.303	0	0.595	0.233	0.29	0.207	0.283	0.333	0.993	0.203	0.073	1.35	0.315	100.116	23.3333	88.0368	145.993	27.0616	28.2418	160.87	188.571
LACMENT323467 (bottom)	ANTC43760	Myrmicinae	Temnothorax	salvini	w	salvini group	LACM	Cartago	Costa Rica	2360m	0	0.909	0.337	1.031	0.93	0.406	1.043	0.269	0.209	0.225	1.45	0.38	0.43	0.493	0.307	0.17	0.336	0.235	0.328	0	0.655	0.329	0.401	0.232	0.297	0.362	1.06	0.209	0.074	1.4515	0.3735	97.7419	25.732	89.1659	155.914	35.3763	26.2069	156.034	209.787
LACMENT323467 (top)	ANTC43760	Myrmicinae	Temnothorax	salvini	w	salvini group	LACM	Cartago	Costa Rica	2360m	1	0.866	0.326	0.982	0.902	0.382	1.027	0.254	0.176	0.281	1.331	0.377	0.39	0.511	0.314	0.161	0.312	0.26	0.331	0	0.597	0.266	0.305	0.207	0.264	0.334	0.993	0.199	0.069	1.4155	0.342	96.0089	24.1611	87.8286	147.561	29.49	28.3246	161.353	196.538
CASENT0868824	Wa-A-07-2-28	Myrmicinae	Temnothorax	terraztecus_mmp_sp_nov	w	salvini group	UCDC (MMPDNA#770)	Chiapas	Mexico	930m	0	0.758	0.225	0.778	0.692	0.317	0.788	0.197	0.124	0.186	1.023	0.308	0.305	0.406	0.252	0.161	0.276	0.199	0.246	0	0.511	0.206	0.246	0.148	0.247	0.247	0.809	0.185	0.059	1.086	0.259	109.538	23.849	87.8173	147.832	29.7688	30.1075	166.892	204.02
CASENT0868965	Wa-A-07-2-28	Myrmicinae	Temnothorax	terraztecus_mmp_sp_nov	w	salvini group	JTLC	Chiapas	Mexico	930m	0	0.762	0.229	0.81	0.728	0.324	0.805	0.198	0.123	0.174	1.057	0.324	0.32	0.408	0.246	0.162	0.279	0.206	0.246	0	0.516	0.233	0.273	0.159	0.271	0.261	0.884	0.18	0.064	1.1305	0.2595	104.67	22.9544	90.4348	145.192	32.0055	30.6528	164.151	198.058
CASENT0868966	Wa-A-07-2-28	Myrmicinae	Temnothorax	terraztecus_mmp_sp_nov	w	salvini group	JTLC	Chiapas	Mexico	930m	0	0.749	0.222	0.77	0.682	0.291	0.752	0.189	0.125	0.184	1.027	0.313	0.292	0.405	0.245	0.155	0.265	0.202	0.196	0	0.493	0.227	0.264	0.151	0.264	0.246	0.786	0.18	0.057	1.058	0.2515	109.824	23.7713	90.6915	150.587	33.2845	30.4771	162.914	200.495
CASENT0868823	Wm-C-06-2-03	Myrmicinae	Temnothorax	terraztecus_mmp_sp_nov	w	salvini group	UCDC (MMPDNA#P768)	Cortés	Honduras	1220m	0	0.767	0.242	0.845	0.733	0.331	0.819	0.201	0.14	0.198	1.111	0.385	0.323	0.429	0.255	0.174	0.279	0.201	0.203	0	0.535	0.214	0.275	0.158	0.297	0.253	0.817	0.189	0.062	1.1425	0.271	104.638	23.7199	89.4994	151.569	29.1951	34.6535	160.127	213.433
JTLC000014496	Wa-A-07-2-24	Myrmicinae	Temnothorax	terraztecus_mmp_sp_nov	w	salvini group	JTLC	Chiapas	Mexico	930m	0	0.704	0.213	0.715	0.637	0.28	0.721	0.18	0.12	0.163	0.926	0.284	0.276	0.373	0.225	0.147	0.251	0.176	0.176	0	0.468	0.19	0.231	0.137	0.235	0.233	0.752	0.166	0.061	0.9975	0.24	110.518	24.0602	88.3495	145.369	29.8273	30.6695	170.073	211.932
CASENT0756844	MMP02493	Myrmicinae	Temnothorax	politus	g	subditivus group	MMPC	Arizona	United States	985	1	0.62	0.294	0.796	0.742	0.316	0.8	0.216	0.175	0.184	1.298	0.326	0.374	0.444	0.222	0.189	0.366	0.203	0.309	0	0.761	0.337	0.38	0.206	0.274	0.409	0.693	0.149	0.057	1.142	0.3035	83.558	26.5762	92.75	174.933	45.4178	25.1156	198.544	218.719
MCZENT00023781 (bottom)	ANTC43755	Myrmicinae	Temnothorax	politus	w	subditivus group	MCZC	Arizona	United States	685m	0	0.425	0.171	0.477	0.439	0.218	0.546	0.136	0.113	0.133	0.633	0.227	0.213	0.248	0.15	0.097	0.184	0.125	0.138	0	0.303	0.121	0.179	0.108	0.137	0.2	0.417	0.111	0.042	0.712	0.1925	96.8109	27.0365	80.4029	144.191	27.5626	35.861	185.185	198.4
MCZENT00023781 (top)	ANTC43755	Myrmicinae	Temnothorax	politus	w	subditivus group	MCZC	Arizona	United States	685m	0	0.424	0.17	0.468	0.419	0.201	0.529	0.121	0.102	0.119	0.581	0.213	0.207	0.239	0.161	0.094	0.165	0.114	0.132	0	0.282	0.108	0.165	0.101	0.12	0.188	0.407	0.098	0.028	0.6835	0.172	101.193	25.1646	79.206	138.663	25.7757	36.6609	186.139	209.649
CASENT0756845	MMP02493	Myrmicinae	Temnothorax	politus	w	subditivus group	MMPC	Arizona	United States	985	0	0.555	0.235	0.655	0.602	0.282	0.715	0.157	0.121	0.167	0.855	0.318	0.272	0.355	0.223	0.223	0.249	0.169	0.206	0	0.431	0.158	0.267	0.163	0.185	0.286	0.579	0.153	0.047	0.9595	0.2175	92.1927	22.6681	84.1958	142.027	26.2458	37.193	175.46	210.059
CASENT0756846	MMP02493	Myrmicinae	Temnothorax	politus	w	subditivus group	MMPC	Arizona	United States	985	0	0.53	0.221	0.599	0.537	0.271	0.658	0.148	0.115	0.141	0.766	0.268	0.245	0.317	0.166	0.124	0.217	0.162	0.159	0	0.387	0.152	0.235	0.138	0.165	0.257	0.528	0.139	0.044	0.866	0.2055	98.6965	23.7298	81.6109	142.644	28.3054	34.9869	186.232	195.679
USNMENT00528925 (bottom)	ANTC7696	Myrmicinae	Temnothorax	politus	w	subditivus group	USNM	Arizona	United States	945m	0	0.519	0.231	0.617	0.565	0.278	0.713	0.18	0.121	0.208	0.833	0.308	0.297	0.314	0.2	0.13	0.236	0.153	0.189	0	0.406	0.161	0.26	0.149	0.179	0.267	0.55	0.148	0.061	0.9215	0.2405	91.8584	26.0988	79.2426	147.434	28.4956	36.9748	179.195	205.229
USNMENT00528925 (middle)	ANTC7696	Myrmicinae	Temnothorax	politus	w	subditivus group	USNM	Arizona	United States	945m	0	0.533	0.227	0.624	0.567	0.276	0.7	0.151	0.129	0.173	0.79	0.307	0.277	0.34	0.19	0.132	0.235	0.136	0.172	0	0.399	0.158	0.251	0.143	0.168	0.275	0.567	0.147	0.043	0.917	0.2155	94.0035	23.5005	81	139.33	27.866	38.8608	192.308	250
USNMENT00528925 (top)	ANTC7696	Myrmicinae	Temnothorax	politus	w	subditivus group	USNM	Arizona	United States	945m	0	0.532	0.212	0.599	0.556	0.259	0.676	0.158	0.109	0.159	0.749	0.294	0.221	0.304	0.164	0.129	0.224	0.141	0.177	0	0.387	0.142	0.245	0.131	0.159	0.252	0.543	0.155	0.056	0.894	0.2125	95.6835	23.7696	82.2485	134.712	25.5396	39.2523	192.366	215.603
MCZENT00581855 (middle)	Z333/SK	Myrmicinae	Temnothorax	subditivus	m	subditivus group	MCZC	Veracruz	Mexico	900m	0	0.418	0.142	0.537	0.473	0.234	0.529	0.222	0.175	0.051	0.877	n/a	0.295	0.289	0.186	0.072	0.161	0.154	0.181	0	0.558	n/a	n/a	0.184	0.219	0.276	0.679	0.084	0.053	0.7375	0.3095	88.3721	41.9661	89.414	185.412	n/a	n/a	150	187.662
CASENT0756100 (top)	PSW7940	Myrmicinae	Temnothorax	subditivus	m	subditivus group	PSWC	Magdalena	Colombia	40m	0	0.368	0.107	0.514	0.452	0.219	0.503	0.228	0.186	0.033	0.81	n/a	0.268	0.273	0.151	0.039	0.139	0.123	0.17	0	0.542	n/a	n/a	0.133	0.169	0.26	0.596	0.09	0.044	0.7035	0.321	81.4159	45.629	89.8608	179.204	n/a	n/a	195.489	221.951
CASENT0915978 (bottom)	PSW7185	Myrmicinae	Temnothorax	subditivus	m	subditivus group	PSWC	Texas	United States	45m	0	0.421	0.128	0.505	0.439	0.222	0.51	0.217	0.191	0.037	0.835	n/a	0.278	0.285	0.165	0.056	0.134	0.144	0.171	0	0.511	n/a	n/a	0.131	0.157	0.248	0.628	0.076	0.047	0.694	0.3125	95.8998	45.0288	86.0784	190.205	n/a	n/a	189.313	197.917
LACMENT141164 (top)	JTL0845	Myrmicinae	Temnothorax	subditivus	g	subditivus group	JTLC (MMPDNA#P225)	Magdalena	Colombia	20m	0	0.603	0.242	0.732	0.673	0.292	0.765	0.225	0.166	0.165	1.187	0.327	0.378	0.39	0.209	0.181	0.323	0.18	0.269	0	0.671	0.339	0.349	0.185	0.302	0.403	0.713	0.146	0.051	1.0555	0.308	89.5988	29.1805	87.9739	176.374	50.3715	27.5484	217.838	216.667
MCZENT00534455 (top)	ANTC43790	Myrmicinae	Temnothorax	subditivus	g	subditivus group	MCZC	Sacatepéquez	Guatemala	1600m	0	0.703	0.265	0.812	0.741	0.33	0.838	0.254	0.196	0.17	1.32	0.402	0.379	0.429	0.288	0.195	0.342	0.224	0.295	0	0.82	0.408	0.406	0.243	0.323	0.404	0.8	0.168	0.056	1.16	0.352	94.8718	30.3448	88.4248	178.138	55.0607	30.4545	166.255	191.518
CASENT0915978 (top)	PSW7185	Myrmicinae	Temnothorax	subditivus	g	subditivus group	PSWC	Texas	United States	45m	0	0.627	0.252	0.802	0.752	0.293	0.782	0.252	0.185	0.176	1.245	0.307	0.345	0.44	0.232	0.189	0.329	0.215	0.305	0	0.733	0.359	0.354	0.208	0.297	0.441	0.706	0.156	0.059	1.143	0.3445	83.3777	30.14	96.1637	165.559	47.7394	24.6586	212.019	204.651
CASENT0619366	JTL7421-s	Myrmicinae	Temnothorax	subditivus	w	subditivus group	JTLC	Estelí	Nicaragua	870m	0	0.645	0.196	0.654	0.598	0.29	0.737	0.168	0.144	0.164	0.849	0.295	0.298	0.35	0.24	0.146	0.244	0.138	0.186	0	0.406	0.143	0.228	0.143	0.263	0.289	0.739	0.183	0.056	0.9665	0.24	107.86	24.8319	81.1398	141.973	23.913	34.7468	202.098	253.623
CASENT0619367	JTL7421-s	Myrmicinae	Temnothorax	subditivus	w	subditivus group	JTLC	Estelí	Nicaragua	870m	0	0.632	0.199	0.642	0.58	0.286	0.734	0.178	0.128	0.158	0.858	0.261	0.271	0.334	0.182	0.154	0.27	0.15	0.179	0	0.421	0.15	0.229	0.155	0.263	0.289	0.715	0.178	0.059	0.947	0.242	108.966	25.5544	79.0191	147.931	25.8621	30.4196	186.452	222.667
LACMENT141164 (bottom)	JTL0845	Myrmicinae	Temnothorax	subditivus	w	subditivus group	JTLC	Magdalena	Colombia	20m	0	0.552	0.184	0.569	0.525	0.257	0.646	0.153	0.12	0.168	0.758	0.253	0.255	0.304	0.173	0.116	0.204	0.12	0.148	0	0.361	0.118	0.199	0.124	0.212	0.246	0.598	0.147	0.051	0.848	0.213	105.143	25.1179	81.2693	144.381	22.4762	33.3773	198.387	253.333
LACMENT323178 (top)	NAW775	Myrmicinae	Temnothorax	subditivus	w	subditivus group	LACM		Panama	1735m	0	0.551	0.186	0.59	0.545	0.26	0.644	0.155	0.119	0.156	0.745	0.251	0.268	0.301	0.21	0.1	0.201	0.121	0.16	0	0.372	0.117	0.192	0.126	0.217	0.252	0.595	0.154	0.051	0.867	0.2145	101.101	24.7405	84.6273	136.697	21.4679	33.6913	200	248.76
LACMENT323229	ANTC43779	Myrmicinae	Temnothorax	subditivus	w	subditivus group	LACM	Nayarit	Mexico	200	0	0.704	0.227	0.712	0.657	0.322	0.81	0.198	0.141	0.18	1.003	0.368	0.318	0.417	0.232	0.174	0.277	0.153	0.199	0	0.47	0.161	0.277	0.153	0.298	0.32	0.837	0.208	0.058	1.062	0.2685	107.154	25.2825	81.1111	152.664	24.5053	36.6899	209.15	272.549
LACMENT323231 (top)	ANTC43781	Myrmicinae	Temnothorax	subditivus	w	subditivus group	LACM	Veracruz	Mexico	900m	0	0.595	0.211	0.646	0.598	0.274	0.703	0.171	0.125	0.168	0.815	0.366	0.292	0.359	0.235	0.161	0.263	0.162	0.206	0	0.422	0.123	0.289	0.163	0.263	0.292	0.647	0.164	0.059	0.9495	0.2335	99.4983	24.5919	85.064	136.288	20.5686	44.908	179.141	221.605
LACMENT323234 (top)	ANTC43784	Myrmicinae	Temnothorax	subditivus	w	subditivus group	LACM	Nuevo León	Mexico	750	0	0.609	0.237	0.693	0.638	0.291	0.741	0.181	0.141	0.166	0.876	0.302	0.3	0.378	0.2	0.138	0.249	0.166	0.204	0	0.428	0.153	0.278	0.147	0.242	0.289	0.641	0.162	0.053	1.0085	0.2515	95.4545	24.938	86.0999	137.304	23.9812	34.4749	196.599	227.711
MCZENT00534456 (bottom)	ANTC43790	Myrmicinae	Temnothorax	subditivus	w	subditivus group	MCZC	Sacatepéquez	Guatemala	1600m	0	0.666	0.221	0.671	0.622	0.313	0.773	0.192	0.146	0.17	0.833	0.363	0.29	0.361	0.239	0.155	0.268	0.15	0.202	0	0.465	0.138	0.27	0.155	0.25	0.284	0.744	0.168	0.056	1.0085	0.265	107.074	26.2766	80.4657	133.923	22.1865	43.5774	183.226	240.667
MCZENT00581851 (top)	ANTC43786	Myrmicinae	Temnothorax	subditivus	w	subditivus group	MCZC	Campeche	Mexico	10m	0	0.592	0.202	0.63	0.579	0.266	0.694	0.162	0.118	0.156	0.828	0.305	0.271	0.326	0.196	0.143	0.239	0.134	0.169	0	0.426	0.158	0.3	0.139	0.272	0.285	0.635	0.172	0.066	0.926	0.221	102.245	23.8661	83.4294	143.005	27.2884	36.8357	205.036	243.284
MCZENT00581852	ANTC43787	Myrmicinae	Temnothorax	subditivus	w	subditivus group	MCZC	Chiapas	Mexico	2200	0	0.624	0.223	0.671	0.616	0.288	0.746	0.176	0.136	0.189	0.847	0.297	0.296	0.352	0.217	0.133	0.246	0.138	0.178	0	0.44	0.133	0.238	0.149	0.239	0.279	0.67	0.159	0.056	0.989	0.244	101.299	24.6714	82.5737	137.5	21.5909	35.0649	187.248	255.072
CASENT0758337 (top)	ANTC43794	Myrmicinae	Temnothorax	subditivus	w	subditivus group	PSWC	Guanacaste	Costa Rica	20m	0	0.528	0.203	0.592	0.525	0.263	0.647	0.157	0.117	0.138	0.755	0.247	0.255	0.312	0.168	0.144	0.235	0.124	0.169	0	0.381	0.138	0.179	0.126	0.219	0.272	0.574	0.138	0.049	0.8485	0.2155	100.571	25.3978	81.1437	143.81	26.2857	32.7152	215.873	251.613
CASENT0758322 (top)	PSW3234	Myrmicinae	Temnothorax	subditivus	w	subditivus group	UCDC	Texas	United States	160m	0	0.58	0.207	0.649	0.595	0.288	0.713	0.17	0.123	0.166	0.815	0.272	0.265	0.327	0.189	0.133	0.229	0.15	0.182	0	0.42	0.167	0.269	0.151	0.248	0.297	0.615	0.161	0.054	0.9515	0.2315	97.479	24.33	83.4502	136.975	28.0672	33.3742	196.689	218
CASENT0609888	Go-A-08-2-04	Myrmicinae	Temnothorax	subditivus	w	subditivus group	UCDC (MMPDNA#P059)	Chiapas	Mexico	100m	0	0.629	0.222	0.66	0.613	0.296	0.716	0.168	0.131	0.155	0.84	0.305	0.303	0.362	0.215	0.153	0.251	0.147	0.179	0	0.441	0.157	0.272	0.133	0.277	0.286	0.661	0.185	0.056	0.971	0.2335	102.61	24.0474	85.6145	137.031	25.6117	36.3095	215.038	246.259
CASENT0758702	PSW7185	Myrmicinae	Temnothorax	subditivus	w	subditivus group	UCDC (MMPDNA#P208)	Texas	United States	45m	0	0.598	0.22	0.647	0.594	0.291	0.727	0.178	0.127	0.168	0.845	0.261	0.285	0.335	0.209	0.139	0.234	0.148	0.19	0	0.429	0.16	0.241	0.143	0.233	0.302	0.642	0.159	0.051	0.9575	0.2415	100.673	25.2219	81.7056	142.256	26.936	30.8876	211.189	226.351
CASENT0758297	ANTC43807	Myrmicinae	Temnothorax	subditivus	w	subditivus group	UNAM (MMPDNA#P231)	Jalisco	Mexico	135m	0	0.646	0.198	0.643	0.6	0.285	0.719	0.167	0.131	0.165	0.873	0.289	0.272	0.374	0.204	0.139	0.233	0.162	0.201	0	0.402	0.139	0.239	0.141	0.262	0.287	0.738	0.175	0.053	0.9595	0.2325	107.667	24.2314	83.4492	145.5	23.1667	33.1042	203.546	230.864
MCZENT00522078 (top)	ANTC43810	Myrmicinae	Temnothorax	terrigena	g	terrigena group	MCZC	Texas	United States	250	0	0.437	0.202	0.596	0.541	0.214	0.599	0.189	0.154	0.108	0.969	0.207	0.249	0.319	0.165	0.133	0.247	0.163	0.225	0	0.575	0.288	0.268	0.161	0.217	0.346	0.466	0.124	0.044	0.8405	0.266	80.7763	31.6478	90.3172	179.113	53.2348	21.3622	214.907	195.706
CASENT0758305	ANTC43812	Myrmicinae	Temnothorax	terrigena	g	terrigena group	USNM	Tamaulipas	Mexico		0	0.437	0.19	0.605	0.554	0.221	0.613	0.209	0.154	0.112	0.989	0.191	0.266	0.31	0.152	0.115	0.268	0.211	0.242	0	0.601	0.306	0.257	0.202	0.216	0.339	0.482	0.099	0.043	0.8605	0.286	78.8809	33.2365	90.3752	178.52	55.2347	19.3124	167.822	146.919
LACMENT181910 (bottom)	ANTC43810	Myrmicinae	Temnothorax	terrigena	w	terrigena group	LACM	Texas	United States	250	0	0.373	0.156	0.44	0.402	0.225	0.53	0.103	0.082	0.107	0.57	0.136	0.181	0.216	0.101	0.103	0.202	0.142	0.166	0	0.294	0.137	0.166	0.118	0.152	0.24	0.373	0.113	0.039	0.667	0.144	92.7861	21.5892	75.8491	141.791	34.0796	23.8596	203.39	152.113
LACMENT181910 (middle)	ANTC43810	Myrmicinae	Temnothorax	terrigena	w	terrigena group	LACM	Texas	United States	250	0	0.387	0.156	0.442	0.417	0.216	0.53	0.116	0.084	0.104	0.569	0.128	0.189	0.216	0.129	0.101	0.192	0.151	0.146	0	0.282	0.127	0.161	0.115	0.151	0.243	0.364	0.118	0.046	0.682	0.158	92.8058	23.1672	78.6792	136.451	30.4556	22.4956	211.304	143.046
LACMENT181910 (top)	ANTC43810	Myrmicinae	Temnothorax	terrigena	w	terrigena group	LACM	Texas	United States	250	0	0.382	0.153	0.452	0.421	0.231	0.545	0.102	0.085	0.116	0.574	0.155	0.204	0.217	0.118	0.097	0.188	0.147	0.176	0	0.312	0.144	0.166	0.117	0.157	0.252	0.349	0.116	0.039	0.6935	0.1445	90.7363	20.8363	77.2477	136.342	34.2043	27.0035	215.385	147.619
MCZENT00021038 (top)	ANTC43810	Myrmicinae	Temnothorax	terrigena	w	terrigena group	MCZC	Texas	United States	250	0	0.391	0.156	0.468	0.423	0.218	0.541	0.126	0.09	0.104	0.586	0.163	0.184	0.223	0.109	0.102	0.2	0.158	0.154	0	0.3	0.154	0.177	0.139	0.159	0.262	0.358	0.117	0.05	0.6935	0.171	92.435	24.6575	78.1885	138.534	36.4066	27.8157	188.489	141.139
MCZENT00522078 (bottom)	ANTC43810	Myrmicinae	Temnothorax	terrigena	w	terrigena group	MCZC	Texas	United States	250	0	0.36	0.144	0.442	0.414	0.208	0.522	0.112	0.093	0.109	0.559	0.142	0.181	0.211	0.108	0.092	0.197	0.14	0.165	0	0.296	0.14	0.173	0.123	0.161	0.251	0.333	0.114	0.038	0.675	0.1585	86.9565	23.4815	79.3103	135.024	33.8164	25.4025	204.065	150.714
MCZENT00522078 (middle)	ANTC43810	Myrmicinae	Temnothorax	terrigena	w	terrigena group	MCZC	Texas	United States	250	0	0.349	0.138	0.429	0.395	0.219	0.512	0.102	0.08	0.11	0.539	0.128	0.191	0.218	0.111	0.106	0.186	0.16	0.164	0	0.278	0.128	0.14	0.113	0.146	0.242	0.338	0.108	0.048	0.651	0.142	88.3544	21.8126	77.1484	136.456	32.4051	23.7477	214.159	136.25
CASENT0104775	PSW7197-3	Myrmicinae	Temnothorax	terrigena	w	terrigena group	UCDC	Texas	United States	5m	0	0.354	0.165	0.464	0.429	0.217	0.521	0.121	0.086	0.108	0.582	0.151	0.196	0.229	0.125	0.097	0.193	0.149	0.15	0	0.296	0.128	0.154	0.14	0.156	0.252	0.338	0.111	0.042	0.6895	0.164	82.5175	23.7854	82.3417	135.664	29.8368	25.945	180	153.691
CASENT0758301 (right)	ANTC43811	Myrmicinae	Temnothorax	terrigena	w	terrigena group	USNM	Texas	United States	160m	0	0.357	0.133	0.425	0.397	0.208	0.511	0.108	0.084	0.114	0.54	0.136	0.187	0.217	0.118	0.08	0.159	0.145	0.153	0	0.274	0.129	0.142	0.126	0.134	0.237	0.311	0.102	0.042	0.6525	0.15	89.9244	22.9885	77.6908	136.02	32.4937	25.1852	188.095	149.655
CASENT0758302	ANTC43812	Myrmicinae	Temnothorax	terrigena	w	terrigena group	USNM	Tamaulipas	Mexico		0	0.396	0.162	0.47	0.426	0.214	0.539	0.127	0.101	0.109	0.609	0.139	0.193	0.22	0.134	0.103	0.213	0.179	0.145	0	0.312	0.147	0.175	0.137	0.15	0.252	0.367	0.122	0.043	0.6955	0.1775	92.9577	25.5212	79.0353	142.958	34.507	22.8243	183.942	122.905
CASENT0758303 (bottom)	ANTC43812	Myrmicinae	Temnothorax	terrigena	w	terrigena group	USNM	Tamaulipas	Mexico		0	0.386	0.154	0.482	0.457	0.233	0.561	0.131	0.089	0.117	0.634	0.149	0.201	0.248	0.118	0.11	0.224	0.154	0.192	0	0.312	0.153	0.18	0.143	0.157	0.276	0.403	0.129	0.049	0.7375	0.1755	84.4639	23.7966	81.4617	138.731	33.4792	23.5016	193.007	161.039
CASENT0758303 (middle)	ANTC43812	Myrmicinae	Temnothorax	terrigena	w	terrigena group	USNM	Tamaulipas	Mexico		0	0.403	0.156	0.469	0.439	0.226	0.55	0.126	0.092	0.123	0.612	0.131	0.207	0.239	0.125	0.108	0.21	0.161	0.176	0	0.302	0.148	0.167	0.138	0.163	0.271	0.395	0.115	0.047	0.714	0.172	91.7995	24.0896	79.8182	139.408	33.713	21.4052	196.377	148.447
CASENT0758303 (top)	ANTC43812	Myrmicinae	Temnothorax	terrigena	w	terrigena group	USNM	Tamaulipas	Mexico		0	0.386	0.153	0.476	0.438	0.215	0.545	0.129	0.091	0.119	0.603	0.149	0.2	0.225	0.123	0.093	0.201	0.162	0.16	0	0.314	0.148	0.17	0.133	0.157	0.262	0.405	0.122	0.041	0.7105	0.1745	88.1279	24.5602	80.367	137.671	33.79	24.7098	196.992	138.889
CASENT0758304 (top)	ANTC43812	Myrmicinae	Temnothorax	terrigena	w	terrigena group	USNM	Tamaulipas	Mexico		0	0.396	0.147	0.482	0.445	0.218	0.556	0.124	0.097	0.119	0.626	0.15	0.222	0.265	0.115	0.11	0.21	0.18	0.168	0	0.31	0.143	0.179	0.146	0.171	0.284	0.391	0.122	0.049	0.723	0.1725	88.9888	23.8589	80.036	140.674	32.1348	23.9617	194.521	147.222
USNMENT00528965 (middle)	ANTC43810	Myrmicinae	Temnothorax	terrigena	w	terrigena group	USNM	Texas	United States	250	0	0.373	0.158	0.449	0.418	0.221	0.547	0.114	0.085	0.114	0.598	0.142	0.177	0.242	0.116	0.101	0.197	0.15	0.156	0	0.283	0.142	0.164	0.13	0.147	0.256	0.347	0.119	0.04	0.6915	0.1565	89.2344	22.632	76.4168	143.062	33.9713	23.7458	196.923	161.333
[truncated: 4 more columns]

## Sheet: collection_information
SpecimenCode	CollectionCode	Subfamily	Genus	Species	subspecies	LifeStageSex	Medium	SpecimenNotes	DNANotes	LocatedAt	OwnedBy	TypeStatus	DeterminedBy	DateDetermined	CollectedBy	DateCollectedStart	DateCollectedEnd	Method	Habitat	Microhabitat	CollectionNotes	LocalityName	Adm2	Adm1	Country	Elevation	LocLatitude	LocLongitude	LatLonMaxError	BiogeographicRegion	LocalityNotes	ElevationMaxError
JTLC000007439	JTL6281	Myrmicinae	Temnothorax	acuminatus_sp_nov		1w	pin	acuminatus group		MMPC	CASC	holotype of Temnothorax acuminatus	M.M. Prebus	2021-01-01	J. Longino	2008-05-19		search	mesophyl forest	ex bark crevice in treefall	NOTEBY J. Longino, NOTEDATE 19-May-08: Collecting in large treefall. Tree had been down long enough for leaves to be brown and curled but still attached to branches. Epiphyte clumps still intact. Myrmicine worker and queen found in bark crevices at top of tree.	Custepec		Chiapas	Mexico	1530m	15.722	-92.9504	50m	Neotropical
JTLC000007440	JTL6281	Myrmicinae	Temnothorax	acuminatus_sp_nov		1g	pin	acuminatus group		MMPC	CASC	paratype of Temnothorax acuminatus	M.M. Prebus	2021-01-01	J. Longino	2008-05-19		search	mesophyl forest	ex bark crevice in treefall	NOTEBY J. Longino, NOTEDATE 19-May-08: Collecting in large treefall. Tree had been down long enough for leaves to be brown and curled but still attached to branches. Epiphyte clumps still intact. Myrmicine worker and queen found in bark crevices at top of tree.	Custepec		Chiapas	Mexico	1530m	15.722	-92.9504	50m	Neotropical
JTLC000007451	JTL6286	Myrmicinae	Temnothorax	acuminatus_sp_nov		1w	pin	acuminatus group		MMPC	MCZC	paratype of Temnothorax acuminatus	M.M. Prebus	2021-01-01	J. Longino	2008-05-19		search	mesophyl forest	under epiphytes in treefall	NOTEBY J. Longino, NOTEDATE 19-May-08: Collecting in large treefall. Tree had been down long enough for leaves to be brown and curled but still attached to branches. Epiphyte clumps still intact. Under epiphytes.	Custepec		Chiapas	Mexico	1530m	15.722	-92.9504	50m	Neotropical
JTLC000007452	JTL6286	Myrmicinae	Temnothorax	acuminatus_sp_nov		1g	pin	acuminatus group		MMPC	MCZC	paratype of Temnothorax acuminatus	M.M. Prebus	2021-01-01	J. Longino	2008-05-19		search	mesophyl forest	under epiphytes in treefall	NOTEBY J. Longino, NOTEDATE 19-May-08: Collecting in large treefall. Tree had been down long enough for leaves to be brown and curled but still attached to branches. Epiphyte clumps still intact. Under epiphytes.	Custepec		Chiapas	Mexico	1530m	15.722	-92.9504	50m	Neotropical
CASENT0869118	JTL6286	Myrmicinae	Temnothorax	acuminatus_sp_nov		1w	pin	acuminatus group		MMPC	LACM	paratype of Temnothorax acuminatus	M.M. Prebus	2021-01-01	J. Longino	2008-05-19		search	mesophyl forest	under epiphytes in treefall	NOTEBY J. Longino, NOTEDATE 19-May-08: Collecting in large treefall. Tree had been down long enough for leaves to be brown and curled but still attached to branches. Epiphyte clumps still intact. Under epiphytes.	Custepec		Chiapas	Mexico	1530m	15.722	-92.9504	50m	Neotropical
JTLC000007468	JTL6278-s	Myrmicinae	Temnothorax	acuminatus_sp_nov		1w	pin	acuminatus group		MMPC	USNM	paratype of Temnothorax acuminatus	M.M. Prebus	2021-01-01	J. Longino	2008-05-19		search	mesophyl forest	foragers		Custepec		Chiapas	Mexico	1530m	15.722	-92.9504	50m	Neotropical
CASENT0609711	DJC0031b	Myrmicinae	Temnothorax	acuminatus_sp_nov		1w	pin	acuminatus group	MMPDNA#P003	MMPC	UCDC		M.M. Prebus	2021-01-01	D. J. Cox	2008-05-14		search			NOTEBY D. J. Cox, NOTEDATE 14-May-08: at a bait along trail on trail back from cerro bola	Sierra Morena		Chiapas	Mexico	1780m	16.1346	-93.6008	100m	Neotropical
JTLC000014329	Wa-A-04-2-07	Myrmicinae	Temnothorax	acuminatus_sp_nov		1w	pin	acuminatus group		MMPC	UCDC		M.M. Prebus	2021-01-01	LLAMA	2008-05-25	2008-05-25	MiniWinkler	2º mesophil forest	ex sifted leaf litter		5km NNW Coapilla		Chiapas	Mexico	1915m	17.1833	-93.1521	unknown	Neotropical
JTLC000014336	Wa-A-04-2-20	Myrmicinae	Temnothorax	acuminatus_sp_nov		1g	pin	acuminatus group		MMPC	USNM		M.M. Prebus	2021-01-01	LLAMA	2008-05-25		MiniWinkler	2º mesophil forest	ex sifted leaf litter	NOTEBY LLAMA, NOTEDATE 25-May-08: LLAMA taxa (Formicidae, Curculionidae, Diptera, Hymenoptera, Hemiptera, Myriapoda/Arachnida, Staphylinidae, other Coleoptera) extracted; July 2008, Ecosur.	5km NNW Coapilla		Chiapas	Mexico	1915m	17.1828	-93.1519	50m	Neotropical
CASENT0640472	Wa-F-02-2-31	Myrmicinae	Temnothorax	tuxtlanus_sp_nov		1w	pin	acuminatus group	MMPDNA#P291	MMPC	CASC	holotype of Temnothorax tuxtlanus	M.M. Prebus	2021-01-01	ADMAC	2016-06-03		mini Winkler	montane wet forest	ex sifted leaf litter		Ruiz Cortínez, 12 km NE San Andrés Tuxtla		Veracruz	Mexico	1140m	18.5319	-95.143	20m	Neotropical
JTLC000007447	JTL6285	Myrmicinae	Temnothorax	acutispinosus_sp_nov		1w	pin	acutispinosus group		MMPC	CASC	holotype of Temnothorax acutispinosus	M.M. Prebus	2021-01-01	J. Longino	2008-05-19		search	mesophyl forest	under epiphytes in treefall	NOTEBY J. Longino, NOTEDATE 19-May-08: Collecting in large treefall. Tree had been down long enough for leaves to be brown and curled but still attached to branches. Epiphyte clumps still intact. Under epiphytes.	Custepec		Chiapas	Mexico	1530m	15.722	-92.9504	50m	Neotropical
JTLC000007448	JTL6285	Myrmicinae	Temnothorax	acutispinosus_sp_nov		1w	pin	acutispinosus group		MMPC	MCZC	paratype of Temnothorax acutispinosus	M.M. Prebus	2021-01-01	J. Longino	2008-05-19		search	mesophyl forest	under epiphytes in treefall	NOTEBY J. Longino, NOTEDATE 19-May-08: Collecting in large treefall. Tree had been down long enough for leaves to be brown and curled but still attached to branches. Epiphyte clumps still intact. Under epiphytes.	Custepec		Chiapas	Mexico	1530m	15.722	-92.9504	50m	Neotropical
JTLC000007449	JTL6285	Myrmicinae	Temnothorax	acutispinosus_sp_nov		1w	pin	acutispinosus group		MMPC	USNM	paratype of Temnothorax acutispinosus	M.M. Prebus	2021-01-01	J. Longino	2008-05-19		search	mesophyl forest	under epiphytes in treefall	NOTEBY J. Longino, NOTEDATE 19-May-08: Collecting in large treefall. Tree had been down long enough for leaves to be brown and curled but still attached to branches. Epiphyte clumps still intact. Under epiphytes.	Custepec		Chiapas	Mexico	1530m	15.722	-92.9504	50m	Neotropical
JTLC000007450	JTL6285	Myrmicinae	Temnothorax	acutispinosus_sp_nov		1w	pin	acutispinosus group		MMPC	ECOSCE	paratype of Temnothorax acutispinosus	M.M. Prebus	2021-01-01	J. Longino	2008-05-19		search	mesophyl forest	under epiphytes in treefall	NOTEBY J. Longino, NOTEDATE 19-May-08: Collecting in large treefall. Tree had been down long enough for leaves to be brown and curled but still attached to branches. Epiphyte clumps still intact. Under epiphytes.	Custepec		Chiapas	Mexico	1530m	15.722	-92.9504	50m	Neotropical
CASENT0869149	JTL6285	Myrmicinae	Temnothorax	acutispinosus_sp_nov		1w	pin	acutispinosus group		MMPC	LACM	paratype of Temnothorax acutispinosus	M.M. Prebus	2021-01-01	J. Longino	2008-05-19		search	mesophyl forest	under epiphytes in treefall	NOTEBY J. Longino, NOTEDATE 19-May-08: Collecting in large treefall. Tree had been down long enough for leaves to be brown and curled but still attached to branches. Epiphyte clumps still intact. Under epiphytes.	Custepec		Chiapas	Mexico	1530m	15.722	-92.9504	50m	Neotropical
CASENT0869150	JTL6285	Myrmicinae	Temnothorax	acutispinosus_sp_nov		1w	pin	acutispinosus group		MMPC	UNAM	paratype of Temnothorax acutispinosus	M.M. Prebus	2021-01-01	J. Longino	2008-05-19		search	mesophyl forest	under epiphytes in treefall	NOTEBY J. Longino, NOTEDATE 19-May-08: Collecting in large treefall. Tree had been down long enough for leaves to be brown and curled but still attached to branches. Epiphyte clumps still intact. Under epiphytes.	Custepec		Chiapas	Mexico	1530m	15.722	-92.9504	50m	Neotropical
CASENT0869151	JTL6285	Myrmicinae	Temnothorax	acutispinosus_sp_nov		1w	pin	acutispinosus group		MMPC	UCDC	paratype of Temnothorax acutispinosus	M.M. Prebus	2021-01-01	J. Longino	2008-05-19		search	mesophyl forest	under epiphytes in treefall	NOTEBY J. Longino, NOTEDATE 19-May-08: Collecting in large treefall. Tree had been down long enough for leaves to be brown and curled but still attached to branches. Epiphyte clumps still intact. Under epiphytes.	Custepec		Chiapas	Mexico	1530m	15.722	-92.9504	50m	Neotropical
CASENT0869152	JTL6285	Myrmicinae	Temnothorax	acutispinosus_sp_nov		1w	pin	acutispinosus group		MMPC	FSCA	paratype of Temnothorax acutispinosus	M.M. Prebus	2021-01-01	J. Longino	2008-05-19		search	mesophyl forest	under epiphytes in treefall	NOTEBY J. Longino, NOTEDATE 19-May-08: Collecting in large treefall. Tree had been down long enough for leaves to be brown and curled but still attached to branches. Epiphyte clumps still intact. Under epiphytes.	Custepec		Chiapas	Mexico	1530m	15.722	-92.9504	50m	Neotropical
CASENT0869153	JTL6285	Myrmicinae	Temnothorax	acutispinosus_sp_nov		1w	pin	acutispinosus group		MMPC	UVGC	paratype of Temnothorax acutispinosus	M.M. Prebus	2021-01-01	J. Longino	2008-05-19		search	mesophyl forest	under epiphytes in treefall	NOTEBY J. Longino, NOTEDATE 19-May-08: Collecting in large treefall. Tree had been down long enough for leaves to be brown and curled but still attached to branches. Epiphyte clumps still intact. Under epiphytes.	Custepec		Chiapas	Mexico	1530m	15.722	-92.9504	50m	Neotropical
CASENT0869154	JTL6285	Myrmicinae	Temnothorax	acutispinosus_sp_nov		1w	pin	acutispinosus group		MMPC	AMNH	paratype of Temnothorax acutispinosus	M.M. Prebus	2021-01-01	J. Longino	2008-05-19		search	mesophyl forest	under epiphytes in treefall	NOTEBY J. Longino, NOTEDATE 19-May-08: Collecting in large treefall. Tree had been down long enough for leaves to be brown and curled but still attached to branches. Epiphyte clumps still intact. Under epiphytes.	Custepec		Chiapas	Mexico	1530m	15.722	-92.9504	50m	Neotropical
CASENT0869155	JTL6285	Myrmicinae	Temnothorax	acutispinosus_sp_nov		1w	pin	acutispinosus group		MMPC	CASC	paratype of Temnothorax acutispinosus	M.M. Prebus	2021-01-01	J. Longino	2008-05-19		search	mesophyl forest	under epiphytes in treefall	NOTEBY J. Longino, NOTEDATE 19-May-08: Collecting in large treefall. Tree had been down long enough for leaves to be brown and curled but still attached to branches. Epiphyte clumps still intact. Under epiphytes.	Custepec		Chiapas	Mexico	1530m	15.722	-92.9504	50m	Neotropical
CASENT0869156	JTL6285	Myrmicinae	Temnothorax	acutispinosus_sp_nov		1w	pin	acutispinosus group		MMPC	LACM	paratype of Temnothorax acutispinosus	M.M. Prebus	2021-01-01	J. Longino	2008-05-19		search	mesophyl forest	under epiphytes in treefall	NOTEBY J. Longino, NOTEDATE 19-May-08: Collecting in large treefall. Tree had been down long enough for leaves to be brown and curled but still attached to branches. Epiphyte clumps still intact. Under epiphytes.	Custepec		Chiapas	Mexico	1530m	15.722	-92.9504	50m	Neotropical
CASENT0869119	JTL6286	Myrmicinae	Temnothorax	acutispinosus_sp_nov		1w	pin	acutispinosus group		MMPC	UNAM	paratype of Temnothorax acutispinosus	M.M. Prebus	2021-01-01	J. Longino	2008-05-19		search	mesophyl forest	under epiphytes in treefall	NOTEBY J. Longino, NOTEDATE 19-May-08: Collecting in large treefall. Tree had been down long enough for leaves to be brown and curled but still attached to branches. Epiphyte clumps still intact. Under epiphytes.	Custepec		Chiapas	Mexico	1530m	15.722	-92.9504	50m	Neotropical
CASENT0609722	DJC0056	Myrmicinae	Temnothorax	acutispinosus_sp_nov		1w	pin	acutispinosus group	MMPDNA#P060	MMPC	UCDC		M.M. Prebus	2021-01-01	D.J. Cox	2008-05-21	2008-05-21	search				3km ESE Custepec		Chiapas	Mexico	1800m	15.7206	-92.9401	unknown	Neotropical
CASENT0615348	Go-C-03-2-04	Myrmicinae	Temnothorax	acutispinosus_sp_nov		1w	pin	acutispinosus group	CCDB-10156 F06; MMPDNA#P002	MMPC	JTLC		M.M. Prebus	2021-01-01	LLAMA	2010-05-17	2010-05-17	Beating	disturbed pine-oak forest	beating vegetation		9km E Comayagua		Comayagua	Honduras	1720m	14.4441	-87.5543	100m	Neotropical
CASENT0617708	Go-C-06-4-03	Myrmicinae	Temnothorax	altinodus_sp_nov		1w	pin	altinodus group	CCDB-10072 A04; MMPDNA#P213	MMPC	CASC	holotype of Temnothorax altinodus	M.M. Prebus	2021-01-01	LLAMA	2010-06-01	2010-06-01	Beating	mesophyll forest	beating vegetation	NOTEBY LLAMA, NOTEDATE 1-Jun-10: 45 min session; sample taken at Guanales camp	PN Cusuco		Cortés	Honduras	1290m	15.489	-88.2344	70m	Neotropical
MCZENT00561746	Z867/SK	Myrmicinae	Temnothorax	annexus		2w	pin	annexus group		MMPC	MCZC	paralectotypes of Leptothorax annexus	C. Baroni-Urbani	1978	E. Skwarra	1929-06-26				Tillandsia circinnata		Cuernavaca		Morelos	Mexico	1500m	18.9211	-99.2218	8km	Neotropical	coordinates, elevation, and errors estimated from label data	500m
MCZENT00561747	Z867/SK	Myrmicinae	Temnothorax	annexus		2w	pin	annexus group		MMPC	MCZC	lectotype of Leptothorax annexus (bottom) paralectotype of Leptothorax annexus (top)	C. Baroni-Urbani	1978	E. Skwarra	1929-06-26				Tillandsia circinnata		Cuernavaca		Morelos	Mexico	1500m	18.9211	-99.2218	8km	Neotropical	coordinates, elevation, and errors estimated from label data	500m
CASENT0733967	RAJ5277	Myrmicinae	Temnothorax	arbustus_sp_nov		1w	pin	annexus group	MMPDNA#P106	MMPC	UCDC	paratype of Temnothoarx arbustus	M.M. Prebus	2021-01-01	R.A. Johnson	2014-03-21	2014-03-21	hand collecting	dry forest	2" dead branch Bursera	dry forest with Bursera, Jatropha, Quercus, Pachycereus, organpipe	14km NE Hwy 19 turnoff to Presa Santa Inez		Baja California Sur	Mexico	385m	23.575	-110.092	unknown	Nearctic
CASENT0758357	RAJ5277	Myrmicinae	Temnothorax	arbustus_sp_nov		1w	pin	annexus group		MMPC	CASC	holotype of Temnothoarx arbustus	M.M. Prebus	2021-01-01	R.A. Johnson	2014-03-21	2014-03-21	hand collecting	dry forest	2" dead branch Bursera	dry forest with Bursera, Jatropha, Quercus, Pachycereus, organpipe	14km NE Hwy 19 turnoff to Presa Santa Inez		Baja California Sur	Mexico	385m	23.575	-110.092	unknown	Nearctic
CASENT0869068	RAJ5277	Myrmicinae	Temnothorax	arbustus_sp_nov		2w	pin	annexus group		MMPC	UNAM	paratype of Temnothoarx arbustus	M.M. Prebus	2021-01-01	R.A. Johnson	2014-03-21	2014-03-21	hand collecting	dry forest	2" dead branch Bursera	dry forest with Bursera, Jatropha, Quercus, Pachycereus, organpipe	14.0 km NE Hwy 19 turnoff to Presa Santa Inez		Baja California Sur	Mexico	384m	23.575	-110.092		Nearctic
CASENT0869069	RAJ5277	Myrmicinae	Temnothorax	arbustus_sp_nov		2w	pin	annexus group		MMPC	SIBR	paratype of Temnothoarx arbustus	M.M. Prebus	2021-01-01	R.A. Johnson	2014-03-21	2014-03-21	hand collecting	dry forest	2" dead branch Bursera	dry forest with Bursera, Jatropha, Quercus, Pachycereus, organpipe	14.0 km NE Hwy 19 turnoff to Presa Santa Inez		Baja California Sur	Mexico	384m	23.575	-110.092		Nearctic
CASENT0758290	ANTC43738	Myrmicinae	Temnothorax	balnearius_sp_nov		3w	pin	annexus group		MMPC	LACM	paratypes of Temnothorax balnearius	M.M. Prebus	2021-01-01	E.L. Sleeper	1969-10-30				ex Agave stalk		El Charro		Baja California Sur	Mexico	210m	23.4397	-109.808	100m	Nearctic	coordinates, elevation, and errors estimated from label data	10m
LACMENT323198	ANTC43738	Myrmicinae	Temnothorax	balnearius_sp_nov		3w	pin	annexus group	MMPDNA#P335 (bottom)	MMPC	LACM	paratypes of Temnothorax balnearius	M.M. Prebus	2021-01-01	E.L. Sleeper	1969-10-30				ex Agave stalk		El Charro		Baja California Sur	Mexico	210m	23.4397	-109.808	100m	Nearctic	coordinates, elevation, and errors estimated from label data	10m
LACMENT323199	ANTC43738	Myrmicinae	Temnothorax	balnearius_sp_nov		2w, 1g	pin	annexus group	MMPDNA#P152 (bottom)	MMPC	LACM	holotype of Temnothorax balnearius (top) paratype of Temnothorax balnearius (middle and bottom)	M.M. Prebus	2021-01-01	E.L. Sleeper	1969-10-30				ex Agave stalk		El Charro		Baja California Sur	Mexico	210m	23.4397	-109.808	100m	Nearctic	coordinates, elevation, and errors estimated from label data	10m
CASENT0104939	RAJBCS197	Myrmicinae	Temnothorax	obtusigaster_sp_nov		2w	pin	annexus group	MMPDNA#P176 (bottom)	MMPC	UCDC	paratypes of Temnothorax obtusigaster	M.M. Prebus	2021-01-01	R.A. Johnson	1994-02-20			Quercus oblongifolia	high dead branch (1")		1/4 mi S San Francisco		Baja California Sur	Mexico	1100	27.6	-113.017	unknown	Nearctic
CASENT0758654	RAJBCS197	Myrmicinae	Temnothorax	obtusigaster_sp_nov		2w	pin	annexus group		MMPC	CASC	holotype of Temnothorax obtusigaster (bottom) paratype of Temnothorax obtusigaster (top)	M.M. Prebus	2021-01-01	R.A. Johnson	1994-02-20			Quercus oblongifolia	high dead branch (1")		1/4 mi S San Francisco		Baja California Sur	Mexico	1100	27.6	-113.017	unknown	Nearctic
LACMENT323250	ANTC43772	Myrmicinae	Temnothorax	obtusigaster_sp_nov		1w	pin	annexus group		MMPC	LACM		M.M. Prebus	2021-01-01	E.M. Fisher & E.L. Sleeper	1969-11-09						17mi SW Loreto		Baja California Sur	Mexico	390	25.84	-111.55	1000	Nearctic		100
LACMENT323251	ANTC43772	Myrmicinae	Temnothorax	obtusigaster_sp_nov		1w	pin	annexus group		MMPC	LACM		M.M. Prebus	2021-01-01	E.M. Fisher & E.L. Sleeper	1969-11-09						17mi SW Loreto		Baja California Sur	Mexico	390	25.84	-111.55	1000	Nearctic		100
MCZENT00561743	RAJBCS197	Myrmicinae	Temnothorax	obtusigaster_sp_nov		3w	pin	annexus group		MMPC	MCZC	paratypes of Temnothorax obtusigaster	M.M. Prebus	2021-01-01	R.A. Johnson	1994-02-20			Quercus oblongifolia	high dead branch (1")		1/4 mi S San Francisco		Baja California Sur	Mexico	1100	27.6	-113.017	unknown	Nearctic
CASENT0869070	RAJBCS197	Myrmicinae	Temnothorax	obtusigaster_sp_nov		3w	pin	annexus group		MMPC	SIBR	paratypes of Temnothorax obtusigaster	M.M. Prebus	2021-01-01	R.A. Johnson	1994-02-20			Quercus oblongifolia	high dead branch (1")		1/4 mi S San Francisco		Baja California Sur	Mexico	1100	27.6	-113.017	unknown	Nearctic
CASENT0869071	RAJBCS197	Myrmicinae	Temnothorax	obtusigaster_sp_nov		3w	pin	annexus group		MMPC	SIBR	paratypes of Temnothorax obtusigaster	M.M. Prebus	2021-01-01	R.A. Johnson	1994-02-20			Quercus oblongifolia	high dead branch (1")		1/4 mi S San Francisco		Baja California Sur	Mexico	1100	27.6	-113.017	unknown	Nearctic
CASENT0869072	RAJBCS197	Myrmicinae	Temnothorax	obtusigaster_sp_nov		3w	pin	annexus group		MMPC	SIBR	paratypes of Temnothorax obtusigaster	M.M. Prebus	2021-01-01	R.A. Johnson	1994-02-20			Quercus oblongifolia	high dead branch (1")		1/4 mi S San Francisco		Baja California Sur	Mexico	1100	27.6	-113.017	unknown	Nearctic
CASENT0869073	RAJBCS197	Myrmicinae	Temnothorax	obtusigaster_sp_nov		3w	pin	annexus group		MMPC	SIBR	paratypes of Temnothorax obtusigaster	M.M. Prebus	2021-01-01	R.A. Johnson	1994-02-20			Quercus oblongifolia	high dead branch (1")		1/4 mi S San Francisco		Baja California Sur	Mexico	1100	27.6	-113.017	unknown	Nearctic
CASENT0869074	RAJBCS197	Myrmicinae	Temnothorax	obtusigaster_sp_nov		3w	pin	annexus group		MMPC	SIBR	paratypes of Temnothorax obtusigaster	M.M. Prebus	2021-01-01	R.A. Johnson	1994-02-20			Quercus oblongifolia	high dead branch (1")		1/4 mi S San Francisco		Baja California Sur	Mexico	1100	27.6	-113.017	unknown	Nearctic
CASENT0869075	RAJBCS197	Myrmicinae	Temnothorax	obtusigaster_sp_nov		3w	pin	annexus group		MMPC	SIBR	paratypes of Temnothorax obtusigaster	M.M. Prebus	2021-01-01	R.A. Johnson	1994-02-20			Quercus oblongifolia	high dead branch (1")		1/4 mi S San Francisco		Baja California Sur	Mexico	1100	27.6	-113.017	unknown	Nearctic
CASENT0869076	RAJBCS197	Myrmicinae	Temnothorax	obtusigaster_sp_nov		3w	pin	annexus group		MMPC	SIBR	paratypes of Temnothorax obtusigaster	M.M. Prebus	2021-01-01	R.A. Johnson	1994-02-20			Quercus oblongifolia	high dead branch (1")		1/4 mi S San Francisco		Baja California Sur	Mexico	1100	27.6	-113.017	unknown	Nearctic
CASENT0869077	RAJBCS197	Myrmicinae	Temnothorax	obtusigaster_sp_nov		3w	pin	annexus group		MMPC	SIBR	paratypes of Temnothorax obtusigaster	M.M. Prebus	2021-01-01	R.A. Johnson	1994-02-20			Quercus oblongifolia	high dead branch (1")		1/4 mi S San Francisco		Baja California Sur	Mexico	1100	27.6	-113.017	unknown	Nearctic
CASENT0869078	RAJBCS197	Myrmicinae	Temnothorax	obtusigaster_sp_nov		3w	pin	annexus group		MMPC	SIBR	paratypes of Temnothorax obtusigaster	M.M. Prebus	2021-01-01	R.A. Johnson	1994-02-20			Quercus oblongifolia	high dead branch (1")		1/4 mi S San Francisco		Baja California Sur	Mexico	1100	27.6	-113.017	unknown	Nearctic
CASENT0869079	RAJBCS197	Myrmicinae	Temnothorax	obtusigaster_sp_nov		3w	pin	annexus group		MMPC	SIBR	paratypes of Temnothorax obtusigaster	M.M. Prebus	2021-01-01	R.A. Johnson	1994-02-20			Quercus oblongifolia	high dead branch (1")		1/4 mi S San Francisco		Baja California Sur	Mexico	1100	27.6	-113.017	unknown	Nearctic
CASENT0869080	RAJBCS197	Myrmicinae	Temnothorax	obtusigaster_sp_nov		3w	pin	annexus group		MMPC	SIBR	paratypes of Temnothorax obtusigaster	M.M. Prebus	2021-01-01	R.A. Johnson	1994-02-20			Quercus oblongifolia	high dead branch (1")		1/4 mi S San Francisco		Baja California Sur	Mexico	1100	27.6	-113.017	unknown	Nearctic
CASENT0869081	RAJBCS197	Myrmicinae	Temnothorax	obtusigaster_sp_nov		3w	pin	annexus group		MMPC	SIBR	paratypes of Temnothorax obtusigaster	M.M. Prebus	2021-01-01	R.A. Johnson	1994-02-20			Quercus oblongifolia	high dead branch (1")		1/4 mi S San Francisco		Baja California Sur	Mexico	1100	27.6	-113.017	unknown	Nearctic
CASENT0869082	RAJBCS197	Myrmicinae	Temnothorax	obtusigaster_sp_nov		3w	pin	annexus group		MMPC	SIBR	paratypes of Temnothorax obtusigaster	M.M. Prebus	2021-01-01	R.A. Johnson	1994-02-20			Quercus oblongifolia	high dead branch (1")		1/4 mi S San Francisco		Baja California Sur	Mexico	1100	27.6	-113.017	unknown	Nearctic
CASENT0869083	RAJBCS197	Myrmicinae	Temnothorax	obtusigaster_sp_nov		3w	pin	annexus group		MMPC	SIBR	paratypes of Temnothorax obtusigaster	M.M. Prebus	2021-01-01	R.A. Johnson	1994-02-20			Quercus oblongifolia	high dead branch (1")		1/4 mi S San Francisco		Baja California Sur	Mexico	1100	27.6	-113.017	unknown	Nearctic
CASENT0869084	RAJBCS197	Myrmicinae	Temnothorax	obtusigaster_sp_nov		3w	pin	annexus group		MMPC	SIBR	paratypes of Temnothorax obtusigaster	M.M. Prebus	2021-01-01	R.A. Johnson	1994-02-20			Quercus oblongifolia	high dead branch (1")		1/4 mi S San Francisco		Baja California Sur	Mexico	1100	27.6	-113.017	unknown	Nearctic
CASENT0869085	RAJBCS197	Myrmicinae	Temnothorax	obtusigaster_sp_nov		3w	pin	annexus group		MMPC	SIBR	paratypes of Temnothorax obtusigaster	M.M. Prebus	2021-01-01	R.A. Johnson	1994-02-20			Quercus oblongifolia	high dead branch (1")		1/4 mi S San Francisco		Baja California Sur	Mexico	1100	27.6	-113.017	unknown	Nearctic
CASENT0869086	RAJBCS197	Myrmicinae	Temnothorax	obtusigaster_sp_nov		3w	pin	annexus group		MMPC	SIBR	paratypes of Temnothorax obtusigaster	M.M. Prebus	2021-01-01	R.A. Johnson	1994-02-20			Quercus oblongifolia	high dead branch (1")		1/4 mi S San Francisco		Baja California Sur	Mexico	1100	27.6	-113.017	unknown	Nearctic
CASENT0869087	RAJBCS197	Myrmicinae	Temnothorax	obtusigaster_sp_nov		3w	pin	annexus group		MMPC	SIBR	paratypes of Temnothorax obtusigaster	M.M. Prebus	2021-01-01	R.A. Johnson	1994-02-20			Quercus oblongifolia	high dead branch (1")		1/4 mi S San Francisco		Baja California Sur	Mexico	1100	27.6	-113.017	unknown	Nearctic
CASENT0869088	RAJBCS197	Myrmicinae	Temnothorax	obtusigaster_sp_nov		3w	pin	annexus group		MMPC	SIBR	paratypes of Temnothorax obtusigaster	M.M. Prebus	2021-01-01	R.A. Johnson	1994-02-20			Quercus oblongifolia	high dead branch (1")		1/4 mi S San Francisco		Baja California Sur	Mexico	1100	27.6	-113.017	unknown	Nearctic
CASENT0869089	RAJBCS197	Myrmicinae	Temnothorax	obtusigaster_sp_nov		3w	pin	annexus group		MMPC	SIBR	paratypes of Temnothorax obtusigaster	M.M. Prebus	2021-01-01	R.A. Johnson	1994-02-20			Quercus oblongifolia	high dead branch (1")		1/4 mi S San Francisco		Baja California Sur	Mexico	1100	27.6	-113.017	unknown	Nearctic
CASENT0869090	RAJBCS197	Myrmicinae	Temnothorax	obtusigaster_sp_nov		3w	pin	annexus group		MMPC	SIBR	paratypes of Temnothorax obtusigaster	M.M. Prebus	2021-01-01	R.A. Johnson	1994-02-20			Quercus oblongifolia	high dead branch (1")		1/4 mi S San Francisco		Baja California Sur	Mexico	1100	27.6	-113.017	unknown	Nearctic
CASENT0869091	RAJBCS197	Myrmicinae	Temnothorax	obtusigaster_sp_nov		3w	pin	annexus group		MMPC	SIBR	paratypes of Temnothorax obtusigaster	M.M. Prebus	2021-01-01	R.A. Johnson	1994-02-20			Quercus oblongifolia	high dead branch (1")		1/4 mi S San Francisco		Baja California Sur	Mexico	1100	27.6	-113.017	unknown	Nearctic
CASENT0869092	RAJBCS197	Myrmicinae	Temnothorax	obtusigaster_sp_nov		3w	pin	annexus group		MMPC	SIBR	paratypes of Temnothorax obtusigaster	M.M. Prebus	2021-01-01	R.A. Johnson	1994-02-20			Quercus oblongifolia	high dead branch (1")		1/4 mi S San Francisco		Baja California Sur	Mexico	1100	27.6	-113.017	unknown	Nearctic
CASENT0869093	RAJBCS197	Myrmicinae	Temnothorax	obtusigaster_sp_nov		3w	pin	annexus group		MMPC	SIBR	paratypes of Temnothorax obtusigaster	M.M. Prebus	2021-01-01	R.A. Johnson	1994-02-20			Quercus oblongifolia	high dead branch (1")		1/4 mi S San Francisco		Baja California Sur	Mexico	1100	27.6	-113.017	unknown	Nearctic
CASENT0869094	RAJBCS197	Myrmicinae	Temnothorax	obtusigaster_sp_nov		3w	pin	annexus group		MMPC	SIBR	paratypes of Temnothorax obtusigaster	M.M. Prebus	2021-01-01	R.A. Johnson	1994-02-20			Quercus oblongifolia	high dead branch (1")		1/4 mi S San Francisco		Baja California Sur	Mexico	1100	27.6	-113.017	unknown	Nearctic
CASENT0869095	RAJBCS197	Myrmicinae	Temnothorax	obtusigaster_sp_nov		3w	pin	annexus group		MMPC	SIBR	paratypes of Temnothorax obtusigaster	M.M. Prebus	2021-01-01	R.A. Johnson	1994-02-20			Quercus oblongifolia	high dead branch (1")		1/4 mi S San Francisco		Baja California Sur	Mexico	1100	27.6	-113.017	unknown	Nearctic
CASENT0869096	RAJBCS197	Myrmicinae	Temnothorax	obtusigaster_sp_nov		3w	pin	annexus group		MMPC	SIBR	paratypes of Temnothorax obtusigaster	M.M. Prebus	2021-01-01	R.A. Johnson	1994-02-20			Quercus oblongifolia	high dead branch (1")		1/4 mi S San Francisco		Baja California Sur	Mexico	1100	27.6	-113.017	unknown	Nearctic
CASENT0869097	RAJBCS197	Myrmicinae	Temnothorax	obtusigaster_sp_nov		3w	pin	annexus group		MMPC	SIBR	paratypes of Temnothorax obtusigaster	M.M. Prebus	2021-01-01	R.A. Johnson	1994-02-20			Quercus oblongifolia	high dead branch (1")		1/4 mi S San Francisco		Baja California Sur	Mexico	1100	27.6	-113.017	unknown	Nearctic
CASENT0869098	RAJBCS197	Myrmicinae	Temnothorax	obtusigaster_sp_nov		3w	pin	annexus group		MMPC	SIBR	paratypes of Temnothorax obtusigaster	M.M. Prebus	2021-01-01	R.A. Johnson	1994-02-20			Quercus oblongifolia	high dead branch (1")		1/4 mi S San Francisco		Baja California Sur	Mexico	1100	27.6	-113.017	unknown	Nearctic
CASENT0869099	RAJBCS197	Myrmicinae	Temnothorax	obtusigaster_sp_nov		3w	pin	annexus group		MMPC	SIBR	paratypes of Temnothorax obtusigaster	M.M. Prebus	2021-01-01	R.A. Johnson	1994-02-20			Quercus oblongifolia	high dead branch (1")		1/4 mi S San Francisco		Baja California Sur	Mexico	1100	27.6	-113.017	unknown	Nearctic
CASENT0869100	RAJBCS197	Myrmicinae	Temnothorax	obtusigaster_sp_nov		3w	pin	annexus group		MMPC	SIBR	paratypes of Temnothorax obtusigaster	M.M. Prebus	2021-01-01	R.A. Johnson	1994-02-20			Quercus oblongifolia	high dead branch (1")		1/4 mi S San Francisco		Baja California Sur	Mexico	1100	27.6	-113.017	unknown	Nearctic
CASENT0869101	RAJBCS197	Myrmicinae	Temnothorax	obtusigaster_sp_nov		3w	pin	annexus group		MMPC	SIBR	paratypes of Temnothorax obtusigaster	M.M. Prebus	2021-01-01	R.A. Johnson	1994-02-20			Quercus oblongifolia	high dead branch (1")		1/4 mi S San Francisco		Baja California Sur	Mexico	1100	27.6	-113.017	unknown	Nearctic
CASENT0869102	RAJBCS197	Myrmicinae	Temnothorax	obtusigaster_sp_nov		3w	pin	annexus group		MMPC	SIBR	paratypes of Temnothorax obtusigaster	M.M. Prebus	2021-01-01	R.A. Johnson	1994-02-20			Quercus oblongifolia	high dead branch (1")		1/4 mi S San Francisco		Baja California Sur	Mexico	1100	27.6	-113.017	unknown	Nearctic
CASENT0869103	RAJBCS197	Myrmicinae	Temnothorax	obtusigaster_sp_nov		1w	pin	annexus group		MMPC	SIBR	paratypes of Temnothorax obtusigaster	M.M. Prebus	2021-01-01	R.A. Johnson	1994-02-20			Quercus oblongifolia	high dead branch (1")		1/4 mi S San Francisco		Baja California Sur	Mexico	1100	27.6	-113.017	unknown	Nearctic
CASENT0869104	RAJBCS197	Myrmicinae	Temnothorax	obtusigaster_sp_nov		1g, 2w	pin	annexus group		MMPC	CASC	paratypes of Temnothorax obtusigaster	M.M. Prebus	2021-01-01	R.A. Johnson	1994-02-20			Quercus oblongifolia	high dead branch (1")		1/4 mi S San Francisco		Baja California Sur	Mexico	1100	27.6	-113.017	unknown	Nearctic
CASENT0105865	ANTC43769	Myrmicinae	Temnothorax	quercicola_sp_nov		3w	pin	annexus group		MMPC	USNM		M.M. Prebus	2021-01-01	quarantine?	1946-02-17				nest in oak branch		Ruby	Santa Cruz	Arizona	United States	1275m	31.4611	-111.238	500m	Nearctic	coordinates, elevation, and errors estimated from label data	10m
CASENT0758296	ANTC43769	Myrmicinae	Temnothorax	quercicola_sp_nov		3w	pin	annexus group		MMPC	USNM		M.M. Prebus	2021-01-01	quarantine?	1946-02-17				nest in oak branch		Ruby	Santa Cruz	Arizona	United States	1275m	31.4611	-111.238	500m	Nearctic	coordinates, elevation, and errors estimated from label data	10m
CASENT0758321	RAJAZ1330	Myrmicinae	Temnothorax	quercicola_sp_nov		2w	pin	annexus group	MMPDNA#P336 (top)	MMPC	UCDC		M.M. Prebus	2021-01-01	R.A. Johnson	1998-04-06		hand collecting	oak woodland	2 in. dead branch Quercus grisea		Pajarito Mtns., 1.2mi E Sycamore Canyon turnoff	Santa Cruz	Arizona	United States	1220m	31.4333	-111.15	unknown	Nearctic
CASENT0869105	RAJAZ1330	Myrmicinae	Temnothorax	quercicola_sp_nov		1g, 2w	pin	annexus group		MMPC	SIBR		M.M. Prebus	2021-01-01	R.A. Johnson	1998-04-06		hand collecting	oak woodland	2 in. dead branch Quercus grisea		Pajarito Mtns., 1.2mi E Sycamore Canyon turnoff	Santa Cruz	Arizona	United States	1220m	31.4333	-111.15	unknown	Nearctic
CASENT0869106	RAJAZ1330	Myrmicinae	Temnothorax	quercicola_sp_nov		3w	pin	annexus group		MMPC	SIBR		M.M. Prebus	2021-01-01	R.A. Johnson	1998-04-06		hand collecting	oak woodland	2 in. dead branch Quercus grisea		Pajarito Mtns., 1.2mi E Sycamore Canyon turnoff	Santa Cruz	Arizona	United States	1220m	31.4333	-111.15	unknown	Nearctic
LACMENT323213	ANTC43763	Myrmicinae	Temnothorax	quercicola_sp_nov		3w	pin	annexus group		MMPC	LACM		M.M. Prebus	2021-01-01	W.S. Creighton	1951-09-01				in Q. emeryi		Baboquivari Mountains	Pima	Arizona	United States	1280	31.78	-111.58	5000	Nearctic		20
FMNHINS0000115818	tc1357749059	Myrmicinae	Temnothorax	quercicola_sp_nov		3w	pin	annexus group		FMNH	FMNH		M.M. Prebus	2021-01-01	W.S. Creighton	1951-09-01				in Q. emeryi		Baboquivari Mountains	Pima	Arizona	United States	1280	31.78	-111.58	5000	Nearctic		20
CASENT0869107	ANTC43763	Myrmicinae	Temnothorax	quercicola_sp_nov		2w	pin	annexus group		MMPC	SIBR		M.M. Prebus	2021-01-01	W.S. Creighton	1951-09-01				in Q. emeryi		Baboquivari Mountains	Pima	Arizona	United States	1280	31.78	-111.58	5000	Nearctic		20
LACMENT323214	ANTC43764	Myrmicinae	Temnothorax	quercicola_sp_nov		3w	pin	annexus group		MMPC	LACM		M.M. Prebus	2021-01-01	W.S. Creighton	1951-07-23				in Q. emeryi		Forestry cabin, Baboquivari Mountains	Pima	Arizona	United States	1070	31.78	-111.58	5000	Nearctic		20
FMNHINS0000115823	tc1357749101	Myrmicinae	Temnothorax	quercicola_sp_nov		1g, 1w	pin	annexus group		FMNH	FMNH		M.M. Prebus	2021-01-01	W.S. Creighton	1951-07-23				in Q. emeryi		Forestry cabin, Baboquivari Mountains	Pima	Arizona	United States	1070	31.78	-111.58	5000	Nearctic		20
LACMENT323215	ANTC43765	Myrmicinae	Temnothorax	quercicola_sp_nov		3w	pin	annexus group		MMPC	LACM		M.M. Prebus	2021-01-01	W.S. Creighton	1952-11-05				in Q. emeryi		Molino Canyon, Baboquivari Mountains	Pima	Arizona	United States	1250	31.78	-111.58	5000	Nearctic		20
LACMENT323216	ANTC43766	Myrmicinae	Temnothorax	quercicola_sp_nov		2w, 1g	pin	annexus group		MMPC	LACM	holotype of Temnothorax quercicola (middle) paratypes of Temnothorax quercicola (top and bottom)	M.M. Prebus	2021-01-01	W.S. Creighton	1951-09-19				in Q. emeryi		Brown Canyon	Pima	Arizona	United States	1220	31.78	-111.58	5000	Nearctic		20
CASENT0172599	ANTC43766	Myrmicinae	Temnothorax	quercicola_sp_nov		4w	pin	annexus group		MMPC	LACM	paratypes of Temnothorax quercicola	M.M. Prebus	2021-01-01	W.S. Creighton	1951-09-19				in Q. emeryi		Brown Canyon	Pima	Arizona	United States	1220	31.78	-111.58	5000	Nearctic		20
FMNHINS0000115817	W.S.Creighton245	Myrmicinae	Temnothorax	quercicola_sp_nov		3w	pin	annexus group		FMNH	FMNH	paratypes of Temnothorax quercicola	M.M. Prebus	2021-01-01	W.S. Creighton	1951-09-19				in Q. emeryi		Brown Canyon	Pima	Arizona	United States	1220	31.78	-111.58	5000	Nearctic		20
LACMENT323217	ANTC43767	Myrmicinae	Temnothorax	quercicola_sp_nov		2w, 1m	pin	annexus group		MMPC	LACM		M.M. Prebus	2021-01-01	W.S. Creighton	1951-09-03				in Q. emeryi		Brown Canyon	Pima	Arizona	United States	1280	31.78	-111.58	5000	Nearctic		20
FMNHINS0000115819	tc1357749045	Myrmicinae	Temnothorax	quercicola_sp_nov		3w	pin	annexus group		FMNH	FMNH		M.M. Prebus	2021-01-01	W.S. Creighton	1951-09-03				in Q. emeryi		Brown Canyon	Pima	Arizona	United States	1280	31.78	-111.58	5000	Nearctic		20
MCZENT00561744	ANTC43764	Myrmicinae	Temnothorax	quercicola_sp_nov		3w	pin	annexus group		MMPC	MCZC		M.M. Prebus	2021-01-01	W.S. Creighton	1951-07-23				in Q. emoryi		forestry cabin Baboquivari Mts.	Pima	Arizona	United States	1070	31.7809	-111.632	100m	Nearctic	coordinates estimated from label data
FMNHINS0000115815	tc1357749087	Myrmicinae	Temnothorax	quercicola_sp_nov		3w	pin	annexus group		FMNH	FMNH		M.M. Prebus	2021-01-01	W.S. Creighton	1951-07-23				in Q. emoryi		forestry cabin Baboquivari Mts.	Pima	Arizona	United States	1070	31.7809	-111.632	100m	Nearctic	coordinates estimated from label data
CASENT0869108	RAJ4559	Myrmicinae	Temnothorax	quercicola_sp_nov		3g	pin	annexus group		MMPC	SIBR		M.M. Prebus	2021-01-01	VanDevender, T.	2010-6-15			Mexican blue oak woodland, rocky mountainside			Rancho San Fernando, E side Sierra de la Madera		Sonora	Mexico	1490m	29.9283	-109.482		Nearctic
CASENT0869109	RAJ4559	Myrmicinae	Temnothorax	quercicola_sp_nov		3w	pin	annexus group		MMPC	SIBR		M.M. Prebus	2021-01-01	VanDevender, T.	2010-6-15			Mexican blue oak woodland, rocky mountainside			Rancho San Fernando, E side Sierra de la Madera		Sonora	Mexico	1490m	29.9283	-109.482		Nearctic
CASENT0868466	MMP03350	Myrmicinae	Temnothorax	quercicola_sp_nov		1w	pin	annexus group		MMPC	MMPC		M.M. Prebus	2021-01-01	M.M. Prebus	2019-11-09	2019-11-09	hand collecting	grassland with scattered oaks	ex dead limb of Quercus emoryi		Molino Basin trailhead	Pima	Arizona	United States	1330m	32.3375	-110.69	3m	Nearctic
CASENT0868467	MMP03350	Myrmicinae	Temnothorax	quercicola_sp_nov		1w	pin	annexus group		MMPC	MMPC		M.M. Prebus	2021-01-01	M.M. Prebus	2019-11-09	2019-11-09	hand collecting	grassland with scattered oaks	ex dead limb of Quercus emoryi		Molino Basin trailhead	Pima	Arizona	United States	1330m	32.3375	-110.69	3m	Nearctic
CASENT0868468	MMP03350	Myrmicinae	Temnothorax	quercicola_sp_nov		1w	pin	annexus group		MMPC	MMPC		M.M. Prebus	2021-01-01	M.M. Prebus	2019-11-09	2019-11-09	hand collecting	grassland with scattered oaks	ex dead limb of Quercus emoryi		Molino Basin trailhead	Pima	Arizona	United States	1330m	32.3375	-110.69	3m	Nearctic
MCZENT00021005	ANTC43069	Myrmicinae	Temnothorax	augusti		2w	pin	augusti group		MMPC	MCZC	lectotype Leptothorax petiolatus (top) paralectotype Leptothorax petiolatus (bottom)	C. Baroni-Urbani	1978	W.M. Wheeler					in Tillandsia		Cuernavaca		Morelos	Mexico	1500m	18.9211	-99.2218	8km	Nearctic	coordinates, elevation, and errors estimated from label data	500m
MCZENT00577105	ANTC43069	Myrmicinae	Temnothorax	augusti		1g	pin	augusti group		MMPC	MCZC	paralectotype Leptothorax petiolatus	C. Baroni-Urbani	1978	W.M. Wheeler					in Tillandsia		Cuernavaca		Morelos	Mexico	1500m	18.9211	-99.2218	8km	Nearctic	coordinates, elevation, and errors estimated from label data	500m
CASENT0619363	JTL7420-s	Myrmicinae	Temnothorax	aureus_sp_nov		1w	pin	augusti group		MMPC	CASC	holotype of Temnothorax aureus	M.M. Prebus	2021-01-01	J. Longino	2011-04-25	2011-04-25	search	tropical dry scrub	strays		16km N Estelí		Estelí	Nicaragua	870m	13.2408	-86.3531	100m	Neotropical
CASENT0619364	JTL7420-s	Myrmicinae	Temnothorax	aureus_sp_nov		1w	pin	augusti group	MMPDNA#P008	MMPC	UCDC	paratype of Temnothorax aureus	M.M. Prebus	2021-01-01	J. Longino	2011-04-25	2011-04-25	search	tropical dry scrub	strays		16km N Esteli		Esteli	Nicaragua	870m	13.2408	-86.3531	unknown	Neotropical
CASENT0631217	JKW-2012-161	Myrmicinae	Temnothorax	aureus_sp_nov		1w	pin	augusti group		JTLC	JTLC		M.M. Prebus	2021-01-01	J.K. Wetterer	2012-07-31			forest			Isla Tasajera; strays		La Paz	El Salvador	5m	13.269	-88.849	unknown	Neotropical	elevation estimated from coordinates
CASENT0638812	JKW-2012-262	Myrmicinae	Temnothorax	aureus_sp_nov		1w	pin	augusti group		JTLC	JTLC		M.M. Prebus	2021-01-01	J.K. Wetterer	2012-08-05			garden			San Salvador; Jardín Botánico La Laguna		San Salvador	El Salvador	845m	13.669	-89.247	unknown	Neotropical	elevation estimated from coordinates
CASENT0740646	ANTC29707	Myrmicinae	Temnothorax	aureus_sp_nov		1w	pin	augusti group		MMPC	CASC		M.M. Prebus	2021-01-01	D.Q. Cavagnaro & M.E. Irwin	1963-06-19						Quetzaltepeque		La Libertad	El Salvador	500m	13.8333	-89.2667	unknown	Neotropical
CASENT0756095	JKW-2012-262	Myrmicinae	Temnothorax	aureus_sp_nov		1w	pin	augusti group		MMPC	MCZC		M.M. Prebus	2021-01-01	J.K. Wetterer	2012-08-05	2012-08-05	hand collecting	garden			San Salvador; Jardín Botánico La Laguna		San Salvador	El Salvador	845m	13.669	-89.247	unknown	Neotropical	elevation estimated from coordinates
CASENT0732606	PSW15573	Myrmicinae	Temnothorax	leucacanthoides_sp_nov		1w	pin	augusti group	MMPDNA#P088	MMPC	UCDC	paratype of Temnothorax leucacanthoides	M.M. Prebus	2021-01-01	P.S. Ward	2006-03-22	2006-03-22	hand collecting	littoral vegetation	ex dead stem of Asteraceae		6km W Puerto Angel	Cerro Largo	Oaxaca	Mexico	20m	15.6667	-96.55		Neotropical
CASENT0756102	PSW15573	Myrmicinae	Temnothorax	leucacanthoides_sp_nov		2w	pin	augusti group		MMPC	CASC	holotype of Teemnothorax leucacanthoides (top) paratype of Temnothorax leucacanthoides (bottom)	M.M. Prebus	2021-01-01	P.S. Ward	2006-03-22	2006-03-22	hand collecting	littoral vegetation	ex dead stem of Asteraceae		6km W Puerto Angel	Cerro Largo	Oaxaca	Mexico	20m	15.6667	-96.55		Neotropical
CASENT0758708	PSW15573	Myrmicinae	Temnothorax	leucacanthoides_sp_nov		1w	pin	augusti group	MMPDNA#P223	MMPC	UCDC	paratype of Temnothorax leucacanthoides	M.M. Prebus	2021-01-01	P.S. Ward	2006-03-22	2006-03-22	hand collecting	littoral vegetation	ex dead stem of Asteraceae		6km W Puerto Angel	Cerro Largo	Oaxaca	Mexico	20m	15.6667	-96.55		Neotropical
CASENT0916001	PSW15573	Myrmicinae	Temnothorax	leucacanthoides_sp_nov		3w	pin	augusti group		MMPC	MCZC	paratypes of Temnothorax leucacanthoides	M.M. Prebus	2021-01-01	P.S. Ward	2006-03-22	2006-03-22	hand collecting	littoral vegetation	ex dead stem of Asteraceae		6km W Puerto Angel	Cerro Largo	Oaxaca	Mexico	20m	15.6667	-96.55		Neotropical
LACMENT323192	ANTC43715	Myrmicinae	Temnothorax	leucacanthus		2w	pin	augusti group	MMPDNA#P368 (bottom)	MMPC	LACM		Baroni Urbani	1978	F. Bonet	1946-09-07						Acapulco		Guerrero	Mexico	350	16.86	-99.88	unknown	Neotropical	coordinates and elevation estimated from label data
MCZENT00032434	ANTC36515	Myrmicinae	Temnothorax	leucacanthus		1w	pin	augusti group		MMPC	MCZC	holotype Leptothorax leucacanthus	C. Baroni-Urbani	1978	W.V. Hagen									Guerrero	Mexico					Neotropical
MCZENT00577108	ANTC36515	Myrmicinae	Temnothorax	leucacanthus		1w	pin	augusti group		MMPC	MCZC	paratype Leptothorax leucacanthus	C. Baroni-Urbani	1978	W.V. Hagen									Guerrero	Mexico					Neotropical
MCZENT00577109	ANTC36515	Myrmicinae	Temnothorax	leucacanthus		1g	pin	augusti group		MMPC	MCZC	paratype Leptothorax leucacanthus	C. Baroni-Urbani	1978	W.V. Hagen									Guerrero	Mexico					Neotropical
CASENT0912957	ANTC36515	Myrmicinae	Temnothorax	leucacanthus		1w	pin	augusti group		NHMB	NHMB	paratype Leptothorax leucacanthus	C. Baroni-Urbani	1978	W.V. Hagen									Guerrero	Mexico					Neotropical
LACMENT323460	ANTC43716	Myrmicinae	Temnothorax	casanovai_sp_nov		1w	pin	casanovai group		MMPC	CASC	paratype of Temnothorax casanovai	M.M. Prebus	2021-01-01	L. Rios Casanova	2000-07-01	2000-07-31	pitfall		pitfall trap		San Rafael Coxcatlan		Puebla	Mexico	1250m	18.35	-97.1167	unknown	Nearctic	coordinates and elevation estimated from label data
LACMENT323461	ANTC43718	Myrmicinae	Temnothorax	casanovai_sp_nov		1w	pin	casanovai group		MMPC	MCZC	paratype of Temnothorax casanovai	M.M. Prebus	2021-01-01	L. Rios Casanova	2000-07-01	2000-07-31	pitfall		pitfall trap		San Rafael Coxcatlan		Puebla	Mexico	1250m	18.35	-97.1167	unknown	Nearctic	coordinates and elevation estimated from label data
LACMENT323462	ANTC43717	Myrmicinae	Temnothorax	casanovai_sp_nov		1w	pin	casanovai group		MMPC	LACM	holotype of Temnothorax casanovai	M.M. Prebus	2021-01-01	L. Rios Casanova	2000-04-01	2000-04-30	pitfall		pitfall trap		San Rafael Coxcatlan		Puebla	Mexico	1250m	18.35	-97.1167	unknown	Nearctic	coordinates and elevation estimated from label data
LACMENT323463	ANTC43717	Myrmicinae	Temnothorax	casanovai_sp_nov		1w	pin	casanovai group		MMPC	LACM	paratype of Temnothorax casanovai	M.M. Prebus	2021-01-01	L. Rios Casanova	2000-04-01	2000-04-30	pitfall		pitfall trap		San Rafael Coxcatlan		Puebla	Mexico	1250m	18.35	-97.1167	unknown	Nearctic	coordinates and elevation estimated from label data
LACMENT323464	LRC2003-17	Myrmicinae	Temnothorax	casanovai_sp_nov		1g, 2w	pin	casanovai group		MMPC	LACM		M.M. Prebus	2021-01-01	L. Rios Casanova	2003-08-23		search	jardin botanico	en rama de Pitahaya	terraza deteriorada	Zapotitlan de las Salinas; jardin botanico		Puebla	Mexico	1500m	18.3312	-97.4575	unknown	Nearctic	coordinates and elevation estimated from label data
LACMENT323465	LRC2003-17	Myrmicinae	Temnothorax	casanovai_sp_nov		3w	pin	casanovai group	MMPDNA#P342 (bottom)	MMPC	LACM		M.M. Prebus	2021-01-01	L. Rios Casanova	2003-08-23		search	jardin botanico	en rama de Pitahaya	terraza deteriorada	Zapotitlan de las Salinas; jardin botanico		Puebla	Mexico	1500m	18.3312	-97.4575	unknown	Nearctic	coordinates and elevation estimated from label data
CASENT0619604	JTL7384-s	Myrmicinae	Temnothorax	clandestinus_sp_nov		1w	pin	clandestinus group	MMPDNA#P007	MMPC	UCDC		M.M. Prebus	2021-01-01	J. Longino	2011-04-22	2011-04-22	baiting	coffee farm	at bait		8km S Somoto		Madriz	Nicaragua	1415m	13.4045	-86.5827	unknown	Neotropical
LACMENT323429	RRS1968-8	Myrmicinae	Temnothorax	clandestinus_sp_nov		2w, 1g	pin	clandestinus group		MMPC	LACM	paratypes of Temnothorax clandestinus	M.M. Prebus	2021-01-01	R.R. Snelling	1968-01-11	1968-01-11					10 mi W Boca Chica	Cameron	Texas	United States	10m	25.96	-97.31	unknown	Nearctic	coordinates estimated from label data
LACMENT323430	RRS1968-8	Myrmicinae	Temnothorax	clandestinus_sp_nov		3w	pin	clandestinus group		MMPC	LACM	holotype of Temnothorax clandestinus (top) paratypes of Temnothorax clandestinus (middle and bottom)	M.M. Prebus	2021-01-01	R.R. Snelling	1968-01-11	1968-01-11					10 mi W Boca Chica	Cameron	Texas	United States	10m	25.96	-97.31	unknown	Nearctic	coordinates estimated from label data
USNMENT00529240	ANTC43708	Myrmicinae	Temnothorax	fuscatus		1w	pin	fuscatus group		MMPC	USNM	lectotype Macromischa fuscata	W.M. Mann	1920	W.M. Wheeler	1911-12-21						Antigua		Sacatepéquez	Guatemala	1545m	14.5586	-90.731	3km	Neotropical	coordinates, elevation, and errors estimated from label data	50m
USNMENT00921897	ANTC43708	Myrmicinae	Temnothorax	fuscatus		3w	pin	fuscatus group		MMPC	USNM	paralectotypes Macromischa fuscata	W.M. Mann	1920	W.M. Wheeler	1911-12-21						Antigua		Sacatepéquez	Guatemala	1545m	14.5586	-90.731	3km	Neotropical	coordinates, elevation, and errors estimated from label data	50m
INBIOCRI001281867	JTL2541	Myrmicinae	Temnothorax	fuscatus		1w	pin	fuscatus group	MMPDNA#P398	MMPC	UCDC		J. Longino	1998-08-04	J. Longino	1989-05-17				Small plateau at 1200m on Bajo Tigre trail. Stray worker.	NOTEBY J. Longino: Small plateau at 1200m on Bajo Tigre trail. Stray worker.	Bajo Tigre, Monteverde		Puntarenas	Costa Rica	1200m	10.3	-84.8167	minutes	Neotropical
MCZENT00581862	ANTC7194	Myrmicinae	Temnothorax	fuscatus		1w	pin	fuscatus group	MMPDNA#P773	MMPC	MCZC				W.L.Brown	1973-01-24	1973-01-27		ravine, cafetal, pines			Boquerón to Quetzaltepeque		La Libertad	El Salvador	1600	13.7333	-89.2833		Neotropical	coordinates and errors estimated from label data
LACMENT323190	ANTC43706	Myrmicinae	Temnothorax	fuscatus		1w	pin	fuscatus group	MMPDNA#P776	MMPC	LACM		R.R. Snelling	1970	San Francisco Quarantine	1944-04-01				ex Orchidaceae					Guatemala					Neotropical
CASENT0610690	Go-B-08-4-03	Myrmicinae	Temnothorax	fuscatus		1w	pin	fuscatus group	MMPDNA#P397	MMPC	UCDC		J. Longino	2010-03-23	LLAMA	2009-06-12	2009-06-12	Beating	hardwood forest	beating vegetation	NOTEBY LLAMA, NOTEDATE 12-Jun-09: 2¬º hardwood forest on a steep slope	5km SE Antigua		Sacatepéquez	Guatemala	1810m	14.5399	-90.7081	57m	Neotropical
CASENT0614497	Go-B-03-1-01	Myrmicinae	Temnothorax	fuscatus		1w	pin	fuscatus group	MMPDNA#P201	MMPC	UCDC		J. Longino	2009-11-10	LLAMA	2009-05-13	2009-05-13	Beating	cloud forest	beating vegetation	NOTEBY LLAMA, NOTEDATE 13-May-09: cloud forest: oak trees, tree ferns	2km SE La Unión		Zacapa	Guatemala	1540m	14.9438	-89.2775	104m	Neotropical
LACMENT323457	ANTC43707	Myrmicinae	Temnothorax	fuscatus		1g	pin	fuscatus group	MMPDNA#P776	MMPC	LACM		M.M. Prebus	2017-07-09	J. Rifkind, P. Gum	1993-05-23						Jutiapa (near Parque Nacional La Tigra)		Tegucigalpa	Honduras	1585m	14.1897	-87.1286	500m	Neotropical	coordinates and errors estimated from label data
CASENT0614147	Go-C-02-1-03	Myrmicinae	Temnothorax	fuscatus		1w	pin	fuscatus group	CCDB-10149 F09; MMPDNA#P774	MMPC	UCDC		J. Longino	2011-01-28	LLAMA	2010-05-09	2010-05-09	Beating	cloud forest	beating vegetation		10km N Catacamas		Olancho	Honduras	1590m	14.942	-85.9098	50m	Neotropical
CASENT0615617	JTL7005	Myrmicinae	Temnothorax	fuscatus		1g	pin	fuscatus group	MMPDNA#P775	MMPC	UCDC		J. Longino	2010-07-23	J. Longino	2010-05-05	2010-05-05	search	pasture/pine forest edge	ex dead stem	NOTEBY J. Longino, NOTEDATE 5-May-10: Edge of pasture and strip of pines and understory broadleaf saplings; ex dead stem; polygyne.	9km NNW La Union		Olancho	Honduras	1450m	15.0969	-86.7459	15m	Neotropical
CASENT0625205	PSW16363	Myrmicinae	Temnothorax	fuscatus		1g, 1m, 1w	pin	fuscatus group		MMPC	JTLC		J. Longino	2011-12-03	P.S. Ward	2010-05-05			montane rainforest	ex dead twig of vine	NOTEBY P.S. Ward, NOTEDATE 5-May-10: Primary montane rainforest with large trees and bamboo understory, along trail (Sendero Jaguar?) that joins Sendero Monte Escondido. GPS reading: 15.09957¬°N 86.73283¬°W. Extent: ¬± 7m (measurement error). different from PSW16337 26dq, 27w, 4m, eggs, larvae, wp, mp	Parq. Nac. La Muralla		Olancho	Honduras	1640m	15.0996	-86.7328	7m	Neotropical
CASENT0758794	PSW16363	Myrmicinae	Temnothorax	fuscatus		1g, 1w	pin	fuscatus group		MMPC	UCDC		J. Longino	2011-12-03	P.S. Ward	2010-05-05			montane rainforest	ex dead twig of vine	NOTEBY P.S. Ward, NOTEDATE 5-May-10: Primary montane rainforest with large trees and bamboo understory, along trail (Sendero Jaguar?) that joins Sendero Monte Escondido. GPS reading: 15.09957¬°N 86.73283¬°W. Extent: ¬± 7m (measurement error). different from PSW16337 26dq, 27w, 4m, eggs, larvae, wp, mp	Parq. Nac. La Muralla		Olancho	Honduras	1640m	15.0996	-86.7328	7m	Neotropical
CASENT0758656	PSW16363	Myrmicinae	Temnothorax	fuscatus		2g, 1w	pin	fuscatus group		MMPC	UCDC		J. Longino	2011-12-03	P.S. Ward	2010-05-05			montane rainforest	ex dead twig of vine	NOTEBY P.S. Ward, NOTEDATE 5-May-10: Primary montane rainforest with large trees and bamboo understory, along trail (Sendero Jaguar?) that joins Sendero Monte Escondido. GPS reading: 15.09957¬°N 86.73283¬°W. Extent: ¬± 7m (measurement error). different from PSW16337 26dq, 27w, 4m, eggs, larvae, wp, mp	Parq. Nac. La Muralla		Olancho	Honduras	1640m	15.0996	-86.7328	7m	Neotropical
CASENT0915981	PSW16363	Myrmicinae	Temnothorax	fuscatus		2w, 1m	pin	fuscatus group		MMPC	UCDC		J. Longino	2011-12-03	P.S. Ward	2010-05-05			montane rainforest	ex dead twig of vine	NOTEBY P.S. Ward, NOTEDATE 5-May-10: Primary montane rainforest with large trees and bamboo understory, along trail (Sendero Jaguar?) that joins Sendero Monte Escondido. GPS reading: 15.09957¬°N 86.73283¬°W. Extent: ¬± 7m (measurement error). different from PSW16337 26dq, 27w, 4m, eggs, larvae, wp, mp	Parq. Nac. La Muralla		Olancho	Honduras	1640m	15.0996	-86.7328	7m	Neotropical
CASENT0732588	Go-C-01-3-03	Myrmicinae	Temnothorax	fuscatus		1w	pin	fuscatus group	MMPDNA#P053	MMPC	UCDC		B. Boudinot	2012	LLAMA	2011-05-20	2011-05-20	beating vegetation	cloud forest w/pine	beating vegetation	NOTEBY LLAMA, NOTEDATE 5-May-10: Ali's pine forest	PN La Muralla		Olancho	Honduras	1630m	15.0968	-86.7329	100m	Neotropical
CASENT0916005	PSW11561	Myrmicinae	Temnothorax	fuscatus		1g, 2w	pin	fuscatus group		MMPC	UCDC				P.S. Ward	1991-12-21			mixed tropical/temp. mesic forest	ex dead culm of sedge		L. Pojoj, Lagos de Montebello		Chiapas	Mexico	1500m	16.1	-91.6667		Neotropical
CASENT0758655	PSW11559	Myrmicinae	Temnothorax	fuscatus		1g	pin	fuscatus group	MMPDNA#P200	MMPC	UCDC		M.M. Prebus	2017-07-25	P.S. Ward	1991-12-21			mixed tropical/temperate mesic forest	ex dead twig		Tziscao,Lagos de Montebello		Chiapas	Mexico	1500	16.0833	-91.6833	1485	Neotropical
CASENT0732587	Ba-D-04-2-06-01	Myrmicinae	Temnothorax	fuscatus		1w	pin	fuscatus group	MMPDNA#P052	MMPC	UCDC		J. Pillow	2012	LLAMA	2010-05-05	2010-05-05	baiting	cloud forest	at bait	NOTEBY LLAMA, NOTEDATE 20-May-11: Patch of cloud forest near transect 2.	RN Datanlí El Diablo		Jinotega	Nicaragua	1320m	13.0991	-85.8695	60m	Neotropical
CASENT0629157	Go-D-04-2-03	Myrmicinae	Temnothorax	fuscatus		1w	pin	fuscatus group		MMPC	JTLC		J. Longino	2012-05-30	LLAMA	2011-05-20	2011-05-20	beating	cloud forest	beating vegetation	NOTEBY LLAMA, NOTEDATE 20-May-11: Small patch of forest near ag clearing with beats.	RN Datanlí El Diablo		Jinotega	Nicaragua	1330m	13.1004	-85.8685	100m	Neotropical
CASENT0629158	Go-D-04-2-03	Myrmicinae	Temnothorax	fuscatus		1w	pin	fuscatus group		MMPC	JTLC		J. Longino	2012-05-30	LLAMA	2011-05-20	2011-05-20	beating	cloud forest	beating vegetation	NOTEBY LLAMA, NOTEDATE 20-May-11: Small patch of forest near ag clearing with beats.	RN Datanlí El Diablo		Jinotega	Nicaragua	1330m	13.1004	-85.8685	100m	Neotropical
CASENT0629161	Go-D-04-3-02	Myrmicinae	Temnothorax	fuscatus		1w	pin	fuscatus group		MMPC	JTLC		J. Longino	2012-05-30	LLAMA	2011-05-20	2011-05-20	beating	montane wet forest	beating vegetation	NOTEBY LLAMA, NOTEDATE 22-Jun-11: sorted at Zamorano. NOTEBY LLAMA, NOTEDATE 20-May-11: Forest in between cloud forest and montane wet forest. Matrix of forest and coffee. Sample taken along a small stream that is used as a water sources. Lots of tree ferns and some big trees. Closed canopy.	RN Datanlí El Diablo		Jinotega	Nicaragua	1310m	13.0955	-85.8584	100m	Neotropical
CASENT0629262	Go-D-05-4-02	Myrmicinae	Temnothorax	fuscatus		1w	pin	fuscatus group	MMPDNA#P777	MMPC	UCDC		J. Longino	2012-06-15	LLAMA	2011-05-25	2011-05-25	beating	cloud forest	beating vegetation	NOTEBY LLAMA, NOTEDATE 25-May-11: Taken at beginning of transect 2.. NOTEBY LLAMA, NOTEDATE 22-Jun-11: sorted at Zamorano	RN Cerro Kilambé		Jinotega	Nicaragua	1430m	13.5675	-85.6967	100m	Neotropical
CASENT0629307	Wm-D-05-2-01	Myrmicinae	Temnothorax	fuscatus		1w	pin	fuscatus group		MMPC	JTLC		J. Longino	2012-06-15	LLAMA	2011-05-23	2011-05-23	maxiWinkler	cloud forest	ex sifted leaf litter	NOTEBY LLAMA, NOTEDATE 23-May-11: Extra litter from transect 2. 1 mesh bag, 3-day extraction.	RN Cerro Kilambé		Jinotega	Nicaragua	1400m	13.5672	-85.6977	150m	Neotropical
CASENT0629025	Go-D-03-3-02	Myrmicinae	Temnothorax	fuscatus		1g	pin	fuscatus group	MMPDNA#P085	MMPC	UCDC		M.M. Prebus	2017-07-09	LLAMA	2011-05-15	2011-05-15	beating vegetation	montane wet forest	beating vegetation		PN Cerro Saslaya		Jinotega	Nicaragua	1070m	13.7694	-85.0243		Neotropical
CASENT0629264	Go-D-06-2-03	Myrmicinae	Temnothorax	fuscatus		1w	pin	fuscatus group	MMPDNA#P399	MMPC	UCDC		J. Longino	2012-06-15	LLAMA	2011-05-30	2011-05-30	beating	oak cloud forest	beating vegetation	NOTEBY LLAMA, NOTEDATE 22-Jun-11: sorted at Zamorano. NOTEBY LLAMA, NOTEDATE 30-May-11: Habitat more disturbed than near peak and transects.	9km NW Jalapa		Nueva Segovia	Nicaragua	1410m	13.9771	-86.1891	100m	Neotropical
CASENT0610696	Go-B-08-4-04	Myrmicinae	Temnothorax	fuscatus		1w	pin	fuscatus group		JTLC	JTLC		J. Longino	2010-03-23	LLAMA	2009-06-12	2009-06-12	Beating	hardwood forest	beating vegetation	NOTEBY LLAMA, NOTEDATE 12-Jun-09: 2¬º hardwood forest on a steep slope	5km SE Antigua		Sacatepéquez	Guatemala	1810m	14.5399	-90.7081	57m	Neotropical
CASENT0610697	Go-B-08-4-04	Myrmicinae	Temnothorax	fuscatus		1w	pin	fuscatus group		JTLC	JTLC		J. Longino	2010-03-23	LLAMA	2009-06-12	2009-06-12	Beating	hardwood forest	beating vegetation	NOTEBY LLAMA, NOTEDATE 12-Jun-09: 2¬º hardwood forest on a steep slope	5km SE Antigua		Sacatepéquez	Guatemala	1810m	14.5399	-90.7081	57m	Neotropical
CASENT0615616	JTL7004	Myrmicinae	Temnothorax	fuscatus		1w	pin	fuscatus group		JTLC	JTLC		J. Longino	2010-07-23	J. Longino	2010-05-05	2010-05-05	search	pasture/pine forest edge	forager on vegetation	NOTEBY J. Longino, NOTEDATE 5-May-10: Edge of pasture and strip of pines and understory broadleaf saplings; forager on Palicourea sapling.	9km NNW La Union		Olancho	Honduras	1450m	15.0966	-86.7453	100m	Neotropical
CASENT0615618	JTL7005	Myrmicinae	Temnothorax	fuscatus		1w	pin	fuscatus group		JTLC	JTLC		J. Longino	2010-07-23	J. Longino	2010-05-05	2010-05-05	search	pasture/pine forest edge	ex dead stem	NOTEBY J. Longino, NOTEDATE 5-May-10: Edge of pasture and strip of pines and understory broadleaf saplings; ex dead stem; polygyne.	9km NNW La Union		Olancho	Honduras	1450m	15.0969	-86.7459	15m	Neotropical
CASENT0615619	JTL7005	Myrmicinae	Temnothorax	fuscatus		1w	pin	fuscatus group		JTLC	JTLC		J. Longino	2010-07-23	J. Longino	2010-05-05	2010-05-05	search	pasture/pine forest edge	ex dead stem	NOTEBY J. Longino, NOTEDATE 5-May-10: Edge of pasture and strip of pines and understory broadleaf saplings; ex dead stem; polygyne.	9km NNW La Union		Olancho	Honduras	1450m	15.0969	-86.7459	15m	Neotropical
CASENT0615620	JTL7005	Myrmicinae	Temnothorax	fuscatus		1g	pin	fuscatus group		JTLC	JTLC		J. Longino	2010-07-23	J. Longino	2010-05-05	2010-05-05	search	pasture/pine forest edge	ex dead stem	NOTEBY J. Longino, NOTEDATE 5-May-10: Edge of pasture and strip of pines and understory broadleaf saplings; ex dead stem; polygyne.	9km NNW La Union		Olancho	Honduras	1450m	15.0969	-86.7459	15m	Neotropical
JTL688893	JTL7005	Myrmicinae	Temnothorax	fuscatus		1g, 1w	ethanol	fuscatus group		MMPC	JTLC		B. Boudinot	2012-11-28	J. Longino	2010-05-05	2010-05-05	search	pasture/pine forest edge	ex dead stem	NOTEBY J. Longino, NOTEDATE 5-May-10: Edge of pasture and strip of pines and understory broadleaf saplings; ex dead stem; polygyne.	9km NNW La Union		Olancho	Honduras	1450m	15.0969	-86.7459	15m	Neotropical
JTL284774	JTL7005	Myrmicinae	Temnothorax	fuscatus		1g, 1w	ethanol	fuscatus group		JTLC	JTLC		J. Longino	2010-07-23	J. Longino	2010-05-05	2010-05-05	search	pasture/pine forest edge	ex dead stem	NOTEBY J. Longino, NOTEDATE 5-May-10: Edge of pasture and strip of pines and understory broadleaf saplings; ex dead stem; polygyne.	9km NNW La Union		Olancho	Honduras	1450m	15.0969	-86.7459	15m	Neotropical
CASENT0616258	Wm-C-02-1-05	Myrmicinae	Temnothorax	fuscatus		1w	pin	fuscatus group	CCDB-10156 A03	JTLC	JTLC		J. Longino	2011-01-28	LLAMA	2010-05-09	2010-05-09	MaxiWinkler	cloud forest	ex sifted leaf litter	NOTEBY LLAMA, NOTEDATE 9-May-10: 4 mesh bags, 3-day extraction	10km N Catacamas		Olancho	Honduras	1560m	14.9412	-85.9087	50m	Neotropical
JTL288113	Go-C-01-1-01	Myrmicinae	Temnothorax	fuscatus		1w	ethanol	fuscatus group		JTLC	JTLC		J. Longino	2010-09-17	LLAMA	2010-05-04	2010-05-04	Beating	cloud forest edge	beating vegetation	NOTEBY LLAMA, NOTEDATE 4-May-10: Pizote trail and in clearing around visitor's center	PN La Muralla		Olancho	Honduras	1480m	15.0971	-86.739	100m	Neotropical
JTL288179	Go-C-01-3-03	Myrmicinae	Temnothorax	fuscatus		1w	ethanol	fuscatus group		JTLC	JTLC		J. Longino	2010-09-17	LLAMA	2010-05-05	2010-05-05	Beating	cloud forest w/pine	beating vegetation	NOTEBY LLAMA, NOTEDATE 5-May-10: Ali's pine forest	PN La Muralla		Olancho	Honduras	1630m	15.0968	-86.7329	100m	Neotropical
JTL688876	Go-C-01-3-03	Myrmicinae	Temnothorax	fuscatus		1w	ethanol	fuscatus group		MMPC	JTLC		B. Boudinot	2012-11-28	LLAMA	2010-05-05	2010-05-05	Beating	cloud forest w/pine	beating vegetation	NOTEBY LLAMA, NOTEDATE 5-May-10: Ali's pine forest	PN La Muralla		Olancho	Honduras	1630m	15.0968	-86.7329	100m	Neotropical
JTL709204	Weirauch-H13L41	Myrmicinae	Temnothorax	fuscatus		1w	ethanol	fuscatus group		JTLC	JTLC		J. Longino	2013-10-03	C. Weirauch, J. Mottern, M. Forthman	2013-04-28	2013-04-28	yellow pan trap		yellow pan trap		La Muralla El Liquidambar		Olancho	Honduras	1470m	15.0967	-86.738	100m	Neotropical
JTL682334	Ba-D-04-2-06-01	Myrmicinae	Temnothorax	fuscatus		1w	ethanol	fuscatus group		MMPC	JTLC		J. Pillow	2012-06-23	LLAMA	2011-05-20	2011-05-20	baiting	cloud forest	at bait	NOTEBY LLAMA, NOTEDATE 20-May-11: Patch of cloud forest near transect 2.	RN Datanlí El Diablo		Jinotega	Nicaragua	1320m	13.0991	-85.8695	60m	Neotropical
INB0003225001	11/RG/DBM/001	Myrmicinae	Temnothorax	nebliselva_sp_nov		1w	pin	fuscatus group		MMPC	JTLC		M.M. Prebus	2021-01-01	D. Brenes	2001-02-19		Sweeping	montane wet forest	Sobre Vegetacion		16km SSE La Virgen		Heredia	Costa Rica	1100m	10.2667	-84.0833	minute	Neotropical
INB0003659261	JTL5420	Myrmicinae	Temnothorax	nebliselva_sp_nov		1g, 1w	pin	fuscatus group	MMPDNA#P202	MMPC	CASC		M.M. Prebus	2021-01-01	J. Longino	2005-02-09		search	cloud forest		NOTEBY J. Longino, NOTEDATE 9-Feb-05: Temnothorax; cloud forest; Cecropia polyphlebia sapling in pasture; nest in one internode; queenrite; only about 5 workers found.	10km NE Vara Blanca	Vara Blanca	Heredia	Costa Rica	1475m	10.2362	-84.1177	1 km	Neotropical
INB0003659262	JTL5420	Myrmicinae	Temnothorax	nebliselva_sp_nov		1w	pin	fuscatus group		?	JTLC		J. Longino	2005-04-11	J. Longino	2005-02-09		search	cloud forest		NOTEBY J. Longino, NOTEDATE 9-Feb-05: Temnothorax; cloud forest; Cecropia polyphlebia sapling in pasture; nest in one internode; queenrite; only about 5 workers found.	10km NE Vara Blanca	Vara Blanca	Heredia	Costa Rica	1500m	10.2362	-84.1177	1 km	Neotropical
INB0003659263	JTL5420	Myrmicinae	Temnothorax	nebliselva_sp_nov		1w	pin	fuscatus group		?	JTLC		J. Longino	2005-04-11	J. Longino	2005-02-09		search	cloud forest		NOTEBY J. Longino, NOTEDATE 9-Feb-05: Temnothorax; cloud forest; Cecropia polyphlebia sapling in pasture; nest in one internode; queenrite; only about 5 workers found.	10km NE Vara Blanca	Vara Blanca	Heredia	Costa Rica	1500m	10.2362	-84.1177	1 km	Neotropical
INB0003659286	JTL5433	Myrmicinae	Temnothorax	nebliselva_sp_nov		1w	pin	fuscatus group		JTLC	JTLC		J. Longino	2005-04-11	J. Longino	2005-02-10		search	cloud forest		NOTEBY J. Longino, NOTEDATE 10-Feb-05: Temnothorax; cloud forest; Cecropia polyphlebia sapling in pasture; nest in one internode of dead branch. Possibly same colony as next. [This and next both have a single dealate queen, so possibly different colonies.] [There is peculiar depigmentation in some workers. For example, head, all appendages including coxae, postpetiole and gaster black, mesosoma a…	10km NE Vara Blanca	Vara Blanca	Heredia	Costa Rica	1500m	10.2362	-84.1177	1 km	Neotropical
INB0003659287	JTL5433	Myrmicinae	Temnothorax	nebliselva_sp_nov		1g	pin	fuscatus group		JTLC	JTLC		J. Longino	2005-04-11	J. Longino	2005-02-10		search	cloud forest		NOTEBY J. Longino, NOTEDATE 10-Feb-05: Temnothorax; cloud forest; Cecropia polyphlebia sapling in pasture; nest in one internode of dead branch. Possibly same colony as next. [This and next both have a single dealate queen, so possibly different colonies.] [There is peculiar depigmentation in some workers. For example, head, all appendages including coxae, postpetiole and gaster black, mesosoma a…	10km NE Vara Blanca	Vara Blanca	Heredia	Costa Rica	1500m	10.2362	-84.1177	1 km	Neotropical
INB0003659288	JTL5433	Myrmicinae	Temnothorax	nebliselva_sp_nov		1w	pin	fuscatus group		JTLC	JTLC		J. Longino	2005-04-11	J. Longino	2005-02-10		search	cloud forest		NOTEBY J. Longino, NOTEDATE 10-Feb-05: Temnothorax; cloud forest; Cecropia polyphlebia sapling in pasture; nest in one internode of dead branch. Possibly same colony as next. [This and next both have a single dealate queen, so possibly different colonies.] [There is peculiar depigmentation in some workers. For example, head, all appendages including coxae, postpetiole and gaster black, mesosoma a…	10km NE Vara Blanca	Vara Blanca	Heredia	Costa Rica	1500m	10.2362	-84.1177	1 km	Neotropical
CASENT0869134	JTL5433	Myrmicinae	Temnothorax	nebliselva_sp_nov		1w	pin	fuscatus group		MMPC	JTLC		J. Longino	2005-04-11	J. Longino	2005-02-10		search	cloud forest		NOTEBY J. Longino, NOTEDATE 10-Feb-05: Temnothorax; cloud forest; Cecropia polyphlebia sapling in pasture; nest in one internode of dead branch. Possibly same colony as next. [This and next both have a single dealate queen, so possibly different colonies.] [There is peculiar depigmentation in some workers. For example, head, all appendages including coxae, postpetiole and gaster black, mesosoma a…	10km NE Vara Blanca	Vara Blanca	Heredia	Costa Rica	1500m	10.2362	-84.1177	1 km	Neotropical
CASENT0869135	JTL5433	Myrmicinae	Temnothorax	nebliselva_sp_nov		1w	pin	fuscatus group		MMPC	JTLC		J. Longino	2005-04-11	J. Longino	2005-02-10		search	cloud forest		NOTEBY J. Longino, NOTEDATE 10-Feb-05: Temnothorax; cloud forest; Cecropia polyphlebia sapling in pasture; nest in one internode of dead branch. Possibly same colony as next. [This and next both have a single dealate queen, so possibly different colonies.] [There is peculiar depigmentation in some workers. For example, head, all appendages including coxae, postpetiole and gaster black, mesosoma a…	10km NE Vara Blanca	Vara Blanca	Heredia	Costa Rica	1500m	10.2362	-84.1177	1 km	Neotropical
CASENT0869136	JTL5433	Myrmicinae	Temnothorax	nebliselva_sp_nov		1w	pin	fuscatus group		MMPC	JTLC		J. Longino	2005-04-11	J. Longino	2005-02-10		search	cloud forest		NOTEBY J. Longino, NOTEDATE 10-Feb-05: Temnothorax; cloud forest; Cecropia polyphlebia sapling in pasture; nest in one internode of dead branch. Possibly same colony as next. [This and next both have a single dealate queen, so possibly different colonies.] [There is peculiar depigmentation in some workers. For example, head, all appendages including coxae, postpetiole and gaster black, mesosoma a…	10km NE Vara Blanca	Vara Blanca	Heredia	Costa Rica	1500m	10.2362	-84.1177	1 km	Neotropical
INB0003659289	JTL5434	Myrmicinae	Temnothorax	nebliselva_sp_nov		1g	pin	fuscatus group		JTLC	INBIO	paratype of Temnothorax nebliselva	J. Longino	2005-04-11	J. Longino	2005-02-10		search	cloud forest		NOTEBY J. Longino, NOTEDATE 10-Feb-05: Temnothorax; cloud forest; Cecropia polyphlebia sapling in pasture; nest in three internodes of live stem; queenrite, monogynous. Possibly same colony as previous. [note that previous colln also with queen, so maybe separate colony.]	10km NE Vara Blanca	Vara Blanca	Heredia	Costa Rica	1500m	10.2362	-84.1177	1 km	Neotropical
CASENT0869137	JTL5434	Myrmicinae	Temnothorax	nebliselva_sp_nov		1w	pin	fuscatus group		MMPC	INBIO	paratype of Temnothorax nebliselva	J. Longino	2005-04-11	J. Longino	2005-02-10		search	cloud forest		NOTEBY J. Longino, NOTEDATE 10-Feb-05: Temnothorax; cloud forest; Cecropia polyphlebia sapling in pasture; nest in three internodes of live stem; queenrite, monogynous. Possibly same colony as previous. [note that previous colln also with queen, so maybe separate colony.]	10km NE Vara Blanca	Vara Blanca	Heredia	Costa Rica	1500m	10.2362	-84.1177	1 km	Neotropical
CASENT0869138	JTL5434	Myrmicinae	Temnothorax	nebliselva_sp_nov		1w	pin	fuscatus group		MMPC	INBIO	paratype of Temnothorax nebliselva	J. Longino	2005-04-11	J. Longino	2005-02-10		search	cloud forest		NOTEBY J. Longino, NOTEDATE 10-Feb-05: Temnothorax; cloud forest; Cecropia polyphlebia sapling in pasture; nest in three internodes of live stem; queenrite, monogynous. Possibly same colony as previous. [note that previous colln also with queen, so maybe separate colony.]	10km NE Vara Blanca	Vara Blanca	Heredia	Costa Rica	1500m	10.2362	-84.1177	1 km	Neotropical
CASENT0869139	JTL5434	Myrmicinae	Temnothorax	nebliselva_sp_nov		1w	pin	fuscatus group		MMPC	CASC	holotype of Temnothorax nebliselva	J. Longino	2005-04-11	J. Longino	2005-02-10		search	cloud forest		NOTEBY J. Longino, NOTEDATE 10-Feb-05: Temnothorax; cloud forest; Cecropia polyphlebia sapling in pasture; nest in three internodes of live stem; queenrite, monogynous. Possibly same colony as previous. [note that previous colln also with queen, so maybe separate colony.]	10km NE Vara Blanca	Vara Blanca	Heredia	Costa Rica	1500m	10.2362	-84.1177	1 km	Neotropical
CASENT0869161	JTL5434	Myrmicinae	Temnothorax	nebliselva_sp_nov		1w	pin	fuscatus group		MMPC	LACM	paratype of Temnothorax nebliselva	J. Longino	2005-04-11	J. Longino	2005-02-10		search	cloud forest		NOTEBY J. Longino, NOTEDATE 10-Feb-05: Temnothorax; cloud forest; Cecropia polyphlebia sapling in pasture; nest in three internodes of live stem; queenrite, monogynous. Possibly same colony as previous. [note that previous colln also with queen, so maybe separate colony.]	10km NE Vara Blanca	Vara Blanca	Heredia	Costa Rica	1500m	10.2362	-84.1177	1 km	Neotropical
CASENT0869162	JTL5434	Myrmicinae	Temnothorax	nebliselva_sp_nov		1w	pin	fuscatus group		MMPC	MCZC	paratype of Temnothorax nebliselva	J. Longino	2005-04-11	J. Longino	2005-02-10		search	cloud forest		NOTEBY J. Longino, NOTEDATE 10-Feb-05: Temnothorax; cloud forest; Cecropia polyphlebia sapling in pasture; nest in three internodes of live stem; queenrite, monogynous. Possibly same colony as previous. [note that previous colln also with queen, so maybe separate colony.]	10km NE Vara Blanca	Vara Blanca	Heredia	Costa Rica	1500m	10.2362	-84.1177	1 km	Neotropical
CASENT0869163	JTL5434	Myrmicinae	Temnothorax	nebliselva_sp_nov		1w	pin	fuscatus group		MMPC	USNM	paratype of Temnothorax nebliselva	J. Longino	2005-04-11	J. Longino	2005-02-10		search	cloud forest		NOTEBY J. Longino, NOTEDATE 10-Feb-05: Temnothorax; cloud forest; Cecropia polyphlebia sapling in pasture; nest in three internodes of live stem; queenrite, monogynous. Possibly same colony as previous. [note that previous colln also with queen, so maybe separate colony.]	10km NE Vara Blanca	Vara Blanca	Heredia	Costa Rica	1500m	10.2362	-84.1177	1 km	Neotropical
CASENT0869164	JTL5434	Myrmicinae	Temnothorax	nebliselva_sp_nov		1w	pin	fuscatus group		MMPC	AMNH	paratype of Temnothorax nebliselva	J. Longino	2005-04-11	J. Longino	2005-02-10		search	cloud forest		NOTEBY J. Longino, NOTEDATE 10-Feb-05: Temnothorax; cloud forest; Cecropia polyphlebia sapling in pasture; nest in three internodes of live stem; queenrite, monogynous. Possibly same colony as previous. [note that previous colln also with queen, so maybe separate colony.]	10km NE Vara Blanca	Vara Blanca	Heredia	Costa Rica	1500m	10.2362	-84.1177	1 km	Neotropical
CASENT0869165	JTL5434	Myrmicinae	Temnothorax	nebliselva_sp_nov		1w	pin	fuscatus group		MMPC	USNM	paratype of Temnothorax nebliselva	J. Longino	2005-04-11	J. Longino	2005-02-10		search	cloud forest		NOTEBY J. Longino, NOTEDATE 10-Feb-05: Temnothorax; cloud forest; Cecropia polyphlebia sapling in pasture; nest in three internodes of live stem; queenrite, monogynous. Possibly same colony as previous. [note that previous colln also with queen, so maybe separate colony.]	10km NE Vara Blanca	Vara Blanca	Heredia	Costa Rica	1500m	10.2362	-84.1177	1 km	Neotropical
CASENT0869166	JTL5434	Myrmicinae	Temnothorax	nebliselva_sp_nov		1w	pin	fuscatus group		MMPC	UCDC	paratype of Temnothorax nebliselva	J. Longino	2005-04-11	J. Longino	2005-02-10		search	cloud forest		NOTEBY J. Longino, NOTEDATE 10-Feb-05: Temnothorax; cloud forest; Cecropia polyphlebia sapling in pasture; nest in three internodes of live stem; queenrite, monogynous. Possibly same colony as previous. [note that previous colln also with queen, so maybe separate colony.]	10km NE Vara Blanca	Vara Blanca	Heredia	Costa Rica	1500m	10.2362	-84.1177	1 km	Neotropical
CASENT0869167	JTL5434	Myrmicinae	Temnothorax	nebliselva_sp_nov		1w	pin	fuscatus group		MMPC	UNAM	paratype of Temnothorax nebliselva	J. Longino	2005-04-11	J. Longino	2005-02-10		search	cloud forest		NOTEBY J. Longino, NOTEDATE 10-Feb-05: Temnothorax; cloud forest; Cecropia polyphlebia sapling in pasture; nest in three internodes of live stem; queenrite, monogynous. Possibly same colony as previous. [note that previous colln also with queen, so maybe separate colony.]	10km NE Vara Blanca	Vara Blanca	Heredia	Costa Rica	1500m	10.2362	-84.1177	1 km	Neotropical
CASENT0869168	JTL5434	Myrmicinae	Temnothorax	nebliselva_sp_nov		1w	pin	fuscatus group		MMPC	UVGC	paratype of Temnothorax nebliselva	J. Longino	2005-04-11	J. Longino	2005-02-10		search	cloud forest		NOTEBY J. Longino, NOTEDATE 10-Feb-05: Temnothorax; cloud forest; Cecropia polyphlebia sapling in pasture; nest in three internodes of live stem; queenrite, monogynous. Possibly same colony as previous. [note that previous colln also with queen, so maybe separate colony.]	10km NE Vara Blanca	Vara Blanca	Heredia	Costa Rica	1500m	10.2362	-84.1177	1 km	Neotropical
CASENT0869169	JTL5434	Myrmicinae	Temnothorax	nebliselva_sp_nov		1w	pin	fuscatus group		MMPC	FSCA	paratype of Temnothorax nebliselva	J. Longino	2005-04-11	J. Longino	2005-02-10		search	cloud forest		NOTEBY J. Longino, NOTEDATE 10-Feb-05: Temnothorax; cloud forest; Cecropia polyphlebia sapling in pasture; nest in three internodes of live stem; queenrite, monogynous. Possibly same colony as previous. [note that previous colln also with queen, so maybe separate colony.]	10km NE Vara Blanca	Vara Blanca	Heredia	Costa Rica	1500m	10.2362	-84.1177	1 km	Neotropical
INB0003659384	JTL5506	Myrmicinae	Temnothorax	nebliselva_sp_nov		1w	pin	fuscatus group		JTLC	JTLC		J. Longino	2005-04-11	J. Longino	2005-03-11		search	cloud forest		NOTEBY J. Longino, NOTEDATE 11-Mar-05: Temnothorax; cloud forest; ex live stem Cecropia polyphlebia.	10km NE Vara Blanca	Vara Blanca	Heredia	Costa Rica	1500m	10.2362	-84.1177	1 km	Neotropical
CASENT0869140	JTL5506	Myrmicinae	Temnothorax	nebliselva_sp_nov		1w	pin	fuscatus group		MMPC	JTLC		J. Longino	2005-04-11	J. Longino	2005-03-11		search	cloud forest		NOTEBY J. Longino, NOTEDATE 11-Mar-05: Temnothorax; cloud forest; ex live stem Cecropia polyphlebia.	10km NE Vara Blanca	Vara Blanca	Heredia	Costa Rica	1500m	10.2362	-84.1177	1 km	Neotropical
CASENT0869141	JTL5506	Myrmicinae	Temnothorax	nebliselva_sp_nov		1w	pin	fuscatus group		MMPC	JTLC		J. Longino	2005-04-11	J. Longino	2005-03-11		search	cloud forest		NOTEBY J. Longino, NOTEDATE 11-Mar-05: Temnothorax; cloud forest; ex live stem Cecropia polyphlebia.	10km NE Vara Blanca	Vara Blanca	Heredia	Costa Rica	1500m	10.2362	-84.1177	1 km	Neotropical
CASENT0869142	JTL5506	Myrmicinae	Temnothorax	nebliselva_sp_nov		1w	pin	fuscatus group		MMPC	JTLC		J. Longino	2005-04-11	J. Longino	2005-03-11		search	cloud forest		NOTEBY J. Longino, NOTEDATE 11-Mar-05: Temnothorax; cloud forest; ex live stem Cecropia polyphlebia.	10km NE Vara Blanca	Vara Blanca	Heredia	Costa Rica	1500m	10.2362	-84.1177	1 km	Neotropical
JTLC000002967	LS2001-pasture-4-1	Myrmicinae	Temnothorax	nebliselva_sp_nov		1w	pin	fuscatus group	MMPDNA#P203	MMPC	JTLC		M.M. Prebus	2021-01-01	Yanoviak & Gering	2001-05-17	2001-05-23	fogging	cloud forest edge	ex relict tree in pasture		Monteverde		Puntarenas	Costa Rica	1500m	10.3	-84.8	minute	Neotropical
JTLC000002968	LS2001-pasture-4-8	Myrmicinae	Temnothorax	nebliselva_sp_nov		1w	pin	fuscatus group		JTLC	JTLC		M.M. Prebus	2021-01-01	Yanoviak & Gering	2001-05-17	2001-05-23	fogging	cloud forest edge	ex relict tree in pasture		Monteverde		Puntarenas	Costa Rica	1500m	10.3	-84.8	minute	Neotropical
JTLC000002969	LS2001-primary-1-5	Myrmicinae	Temnothorax	nebliselva_sp_nov		1w	pin	fuscatus group		JTLC	JTLC		M.M. Prebus	2021-01-01	Yanoviak & Gering	2001-05-17	2001-05-23	fogging	primary cloud forest	ex canopy tree		Monteverde		Puntarenas	Costa Rica	1500m	10.3	-84.8	minute	Neotropical
JTLC000002970	LS2001-primary-1-8	Myrmicinae	Temnothorax	nebliselva_sp_nov		1w	pin	fuscatus group		JTLC	JTLC		M.M. Prebus	2021-01-01	Yanoviak & Gering	2001-05-17	2001-05-23	fogging	primary cloud forest	ex canopy tree		Monteverde		Puntarenas	Costa Rica	1500m	10.3	-84.8	minute	Neotropical
JTLC000002971	LS2001-pasture-4-3	Myrmicinae	Temnothorax	nebliselva_sp_nov		1w	pin	fuscatus group		JTLC	JTLC		M.M. Prebus	2021-01-01	Yanoviak & Gering	2001-05-17	2001-05-23	fogging	cloud forest edge	ex relict tree in pasture		Monteverde		Puntarenas	Costa Rica	1500m	10.3	-84.8	minute	Neotropical
JTLC000002972	LS2001-pasture-3-5	Myrmicinae	Temnothorax	nebliselva_sp_nov		1w	pin	fuscatus group		JTLC	JTLC		M.M. Prebus	2021-01-01	Yanoviak & Gering	2001-05-17	2001-05-23	fogging	cloud forest edge	ex relict tree in pasture		Monteverde		Puntarenas	Costa Rica	1500m	10.3	-84.8	minute	Neotropical
JTLC000002973	LS2001-pasture-3-9	Myrmicinae	Temnothorax	nebliselva_sp_nov		1w	pin	fuscatus group		JTLC	JTLC		M.M. Prebus	2021-01-01	Yanoviak & Gering	2001-05-17	2001-05-23	fogging	cloud forest edge	ex relict tree in pasture		Monteverde		Puntarenas	Costa Rica	1500m	10.3	-84.8	minute	Neotropical
JTLC000002974	LS2001-pasture-3-9	Myrmicinae	Temnothorax	nebliselva_sp_nov		1w	pin	fuscatus group		JTLC	JTLC		M.M. Prebus	2021-01-01	Yanoviak & Gering	2001-05-17	2001-05-23	fogging	cloud forest edge	ex relict tree in pasture		Monteverde		Puntarenas	Costa Rica	1500m	10.3	-84.8	minute	Neotropical
JTLC000002975	LS2001-pasture-3-8	Myrmicinae	Temnothorax	nebliselva_sp_nov		1w	pin	fuscatus group		JTLC	JTLC		M.M. Prebus	2021-01-01	Yanoviak & Gering	2001-05-17	2001-05-23	fogging	cloud forest edge	ex relict tree in pasture		Monteverde		Puntarenas	Costa Rica	1500m	10.3	-84.8	minute	Neotropical
JTLC000002976	LS2001-pasture-3-8	Myrmicinae	Temnothorax	nebliselva_sp_nov		1w	pin	fuscatus group		JTLC	JTLC		M.M. Prebus	2021-01-01	Yanoviak & Gering	2001-05-17	2001-05-23	fogging	cloud forest edge	ex relict tree in pasture		Monteverde		Puntarenas	Costa Rica	1500m	10.3	-84.8	minute	Neotropical
JTLC000002977	LS2001-pasture-3-5	Myrmicinae	Temnothorax	nebliselva_sp_nov		1w	pin	fuscatus group		JTLC	JTLC		M.M. Prebus	2021-01-01	Yanoviak & Gering	2001-05-17	2001-05-23	fogging	cloud forest edge	ex relict tree in pasture		Monteverde		Puntarenas	Costa Rica	1500m	10.3	-84.8	minute	Neotropical
JTLC000002978	LS2001-pasture-1-3	Myrmicinae	Temnothorax	nebliselva_sp_nov		1w	pin	fuscatus group		JTLC	JTLC		M.M. Prebus	2021-01-01	Yanoviak & Gering	2001-05-17	2001-05-23	fogging	cloud forest edge	ex relict tree in pasture		Monteverde		Puntarenas	Costa Rica	1500m	10.3	-84.8	minute	Neotropical
JTLC000002979	LS2001-pasture-4-2	Myrmicinae	Temnothorax	nebliselva_sp_nov		1w	pin	fuscatus group		JTLC	JTLC		M.M. Prebus	2021-01-01	Yanoviak & Gering	2001-05-17	2001-05-23	fogging	cloud forest edge	ex relict tree in pasture		Monteverde		Puntarenas	Costa Rica	1500m	10.3	-84.8	minute	Neotropical
JTLC000002980	LS2001-pasture-1-10	Myrmicinae	Temnothorax	nebliselva_sp_nov		1w	pin	fuscatus group		JTLC	JTLC		M.M. Prebus	2021-01-01	Yanoviak & Gering	2001-05-17	2001-05-23	fogging	cloud forest edge	ex relict tree in pasture		Monteverde		Puntarenas	Costa Rica	1500m	10.3	-84.8	minute	Neotropical
JTLC000002981	LS2001-pasture-4-2	Myrmicinae	Temnothorax	nebliselva_sp_nov		1w	pin	fuscatus group		JTLC	JTLC		M.M. Prebus	2021-01-01	Yanoviak & Gering	2001-05-17	2001-05-23	fogging	cloud forest edge	ex relict tree in pasture		Monteverde		Puntarenas	Costa Rica	1500m	10.3	-84.8	minute	Neotropical
JTLC000002982	LS2001-pasture-4-7	Myrmicinae	Temnothorax	nebliselva_sp_nov		1w	pin	fuscatus group		JTLC	JTLC		M.M. Prebus	2021-01-01	Yanoviak & Gering	2001-05-17	2001-05-23	fogging	cloud forest edge	ex relict tree in pasture		Monteverde		Puntarenas	Costa Rica	1500m	10.3	-84.8	minute	Neotropical
JTLC000002983	LS2001-pasture-4-4	Myrmicinae	Temnothorax	nebliselva_sp_nov		1w	pin	fuscatus group		JTLC	JTLC		M.M. Prebus	2021-01-01	Yanoviak & Gering	2001-05-17	2001-05-23	fogging	cloud forest edge	ex relict tree in pasture		Monteverde		Puntarenas	Costa Rica	1500m	10.3	-84.8	minute	Neotropical
JTLC000002984	LS2001-pasture-4-4	Myrmicinae	Temnothorax	nebliselva_sp_nov		1w	pin	fuscatus group		JTLC	JTLC		M.M. Prebus	2021-01-01	Yanoviak & Gering	2001-05-17	2001-05-23	fogging	cloud forest edge	ex relict tree in pasture		Monteverde		Puntarenas	Costa Rica	1500m	10.3	-84.8	minute	Neotropical
JTLC000002985	LS2001-pasture-4-4	Myrmicinae	Temnothorax	nebliselva_sp_nov		1w	pin	fuscatus group		JTLC	JTLC		M.M. Prebus	2021-01-01	Yanoviak & Gering	2001-05-17	2001-05-23	fogging	cloud forest edge	ex relict tree in pasture		Monteverde		Puntarenas	Costa Rica	1500m	10.3	-84.8	minute	Neotropical
JTLC000002986	LS2001-pasture-4-5	Myrmicinae	Temnothorax	nebliselva_sp_nov		1w	pin	fuscatus group		JTLC	JTLC		M.M. Prebus	2021-01-01	Yanoviak & Gering	2001-05-17	2001-05-23	fogging	cloud forest edge	ex relict tree in pasture		Monteverde		Puntarenas	Costa Rica	1500m	10.3	-84.8	minute	Neotropical
JTLC000002987	LS2001-pasture-4-7	Myrmicinae	Temnothorax	nebliselva_sp_nov		1w	pin	fuscatus group		JTLC	JTLC		M.M. Prebus	2021-01-01	Yanoviak & Gering	2001-05-17	2001-05-23	fogging	cloud forest edge	ex relict tree in pasture		Monteverde		Puntarenas	Costa Rica	1500m	10.3	-84.8	minute	Neotropical
JTLC000002988	LS2001-pasture-4-3	Myrmicinae	Temnothorax	nebliselva_sp_nov		1w	pin	fuscatus group		JTLC	JTLC		M.M. Prebus	2021-01-01	Yanoviak & Gering	2001-05-17	2001-05-23	fogging	cloud forest edge	ex relict tree in pasture		Monteverde		Puntarenas	Costa Rica	1500m	10.3	-84.8	minute	Neotropical
JTLC000002989	LS2001-pasture-4-2	Myrmicinae	Temnothorax	nebliselva_sp_nov		1w	pin	fuscatus group		JTLC	JTLC		M.M. Prebus	2021-01-01	Yanoviak & Gering	2001-05-17	2001-05-23	fogging	cloud forest edge	ex relict tree in pasture		Monteverde		Puntarenas	Costa Rica	1500m	10.3	-84.8	minute	Neotropical
JTLC000002990	LS2001-primary-2-5	Myrmicinae	Temnothorax	nebliselva_sp_nov		1w	pin	fuscatus group		JTLC	JTLC		M.M. Prebus	2021-01-01	Yanoviak & Gering	2001-05-17	2001-05-23	fogging	primary cloud forest	ex canopy tree		Monteverde		Puntarenas	Costa Rica	1500m	10.3	-84.8	minute	Neotropical
JTLC000002991	LS2001-pasture-1-7	Myrmicinae	Temnothorax	nebliselva_sp_nov		1w	pin	fuscatus group		JTLC	JTLC		M.M. Prebus	2021-01-01	Yanoviak & Gering	2001-05-17	2001-05-23	fogging	cloud forest edge	ex relict tree in pasture		Monteverde		Puntarenas	Costa Rica	1500m	10.3	-84.8	minute	Neotropical
JTLC000002992	LS2001-pasture-1-1	Myrmicinae	Temnothorax	nebliselva_sp_nov		1w	pin	fuscatus group		JTLC	JTLC		M.M. Prebus	2021-01-01	Yanoviak & Gering	2001-05-17	2001-05-23	fogging	cloud forest edge	ex relict tree in pasture		Monteverde		Puntarenas	Costa Rica	1500m	10.3	-84.8	minute	Neotropical
JTLC000002993	LS2001-pasture-1-2	Myrmicinae	Temnothorax	nebliselva_sp_nov		1w	pin	fuscatus group		JTLC	JTLC		M.M. Prebus	2021-01-01	Yanoviak & Gering	2001-05-17	2001-05-23	fogging	cloud forest edge	ex relict tree in pasture		Monteverde		Puntarenas	Costa Rica	1500m	10.3	-84.8	minute	Neotropical
JTLC000002994	LS2001-pasture-2-10	Myrmicinae	Temnothorax	nebliselva_sp_nov		1w	pin	fuscatus group		JTLC	JTLC		M.M. Prebus	2021-01-01	Yanoviak & Gering	2001-05-17	2001-05-23	fogging	cloud forest edge	ex relict tree in pasture		Monteverde		Puntarenas	Costa Rica	1500m	10.3	-84.8	minute	Neotropical
JTLC000002995	LS2001-pasture-2-1	Myrmicinae	Temnothorax	nebliselva_sp_nov		1w	pin	fuscatus group		JTLC	JTLC		M.M. Prebus	2021-01-01	Yanoviak & Gering	2001-05-17	2001-05-23	fogging	cloud forest edge	ex relict tree in pasture		Monteverde		Puntarenas	Costa Rica	1500m	10.3	-84.8	minute	Neotropical
INB0003661930	Branstetter-FM05	Myrmicinae	Temnothorax	nebliselva_sp_nov		1w	pin	fuscatus group		INBio	INBio		J. Longino	2005-04-26	M. Branstetter	2005-03-14	2005-03-21	search	montane wet forest			10km NE Vara Blanca	Vara Blanca	Heredia	Costa Rica	1500m	10.2362	-84.1177	1 km	Neotropical
USNMENT00531636	ANTC43729	Myrmicinae	Temnothorax	ocarinae		1w	pin	fuscatus group		MMPC	USNM	holotype Leptothorax ocarinae	C. Baroni-Urbani	1978	quarantine?	1956-10-23				on orchid	at Nogales, AZ				Mexico					Neotropical
MCZENT00581861	ANTC43821	Myrmicinae	Temnothorax	ocarinae		1w	pin	fuscatus group		MMPC	MCZC		M.M. Prebus	2017-07-09	E.S. Ross	1948-12-05						17mi S of Mazamitla		Jalisco	Mexico	1765m	19.6687	-103.02	1km	Nearctic	coordinates, elevation, and errors estimated from label data	50m
MCZENT00016358	ANTC43774	Myrmicinae	Temnothorax	skwarrae		1w	pin	fuscatus group		MMPC	MCZC	lectotype Macromischa skwarrae	W.M. Wheeler	1931	E. Skwarra	1929-06-26				Tillandsia circinnata		Cuernavaca		Morelos	Mexico	1440m	18.9167	-99.1667		Neotropical	elevation estimated from coordinates
MCZENT00577117	ANTC43774	Myrmicinae	Temnothorax	skwarrae		1g	pin	fuscatus group		MMPC	MCZC	paralectotype Macromischa skwarrae	W.M. Wheeler	1931	E. Skwarra	1929-06-26				Tillandsia circinnata		Cuernavaca		Morelos	Mexico	1440m	18.9167	-99.1667		Neotropical	elevation estimated from coordinates
CASENT0600922	MGB626	Myrmicinae	Temnothorax	achii_sp_nov		1w	pin	goniops group	MMPDNA#P080	MMPC	UCDC	paratype Temnothorax achii	M.M. Prebus	2021-01-01	M.G. Branstetter	2007-07-07	2007-07-07	maxiWinkler	tropical dry scrub	ex sifted leaf litter		3.7km SW Morazán		El Progreso	Guatemala	460m	14.9051	-90.1536		Neotropical
CASENT0758686	MB1314	Myrmicinae	Temnothorax	achii_sp_nov		1w	pin	goniops group	MMPDNA#P184	MMPC	UCDC		M.M. Prebus	2021-01-01	M. Barrios	2014-04-27		Maxi Winkler	2nd growth oak cloud forest	ex sifted leaf litter		15km W Chiquimula		Chiquimula	Guatemala	1735	14.7797	-89.6769	50	Neotropical
CASENT0915976	PSW15097-14	Myrmicinae	Temnothorax	achii_sp_nov		3w	pin	goniops group		MMPC	UCDC		M.M. Prebus	2021-01-01	P.S. Ward	2003-11-19		MaxiWinkler	mixed tropical/temp. mesic forest	sifted litter (leaf mold, rotten wood)		1km SSW La Cumbre		Baja Verapaz	Guatemala	1480m	15.0333	-90.2167		Neotropical
JTLC000009871	JTL6022-s	Myrmicinae	Temnothorax	achii_sp_nov		1w	pin	goniops group		MMPC	MCZC	paratype Temnothorax achii	M.M. Prebus	2021-01-01	J. Longino	2007-07-07		Winkler	tropical dry forest	ex sifted leaf litter	NOTEBY J. Longino, NOTEDATE 7-Jul-07: Winkler sample in small dry forest patch; driven to Schuster house, 3 mesh sacks hung by 9pm. Sample taken off at 5am next morning. 8hr extraction.	3.7km SW Morazán		El Progreso	Guatemala	460m	14.9051	-90.1536	50m	Neotropical
JTLC000009876	JTL6022-s	Myrmicinae	Temnothorax	achii_sp_nov		1w	pin	goniops group		MMPC	CASC	holotype Temnothorax achii	M.M. Prebus	2021-01-01	J. Longino	2007-07-07		Winkler	tropical dry forest	ex sifted leaf litter	NOTEBY J. Longino, NOTEDATE 7-Jul-07: Winkler sample in small dry forest patch; driven to Schuster house, 3 mesh sacks hung by 9pm. Sample taken off at 5am next morning. 8hr extraction.	3.7km SW Morazán		El Progreso	Guatemala	460m	14.9051	-90.1536	50m	Neotropical
JTLC000009906	JTL6022-s	Myrmicinae	Temnothorax	achii_sp_nov		1w	pin	goniops group		MMPC	USNM	paratype Temnothorax achii	M.M. Prebus	2021-01-01	J. Longino	2007-07-07		Winkler	tropical dry forest	ex sifted leaf litter	NOTEBY J. Longino, NOTEDATE 7-Jul-07: Winkler sample in small dry forest patch; driven to Schuster house, 3 mesh sacks hung by 9pm. Sample taken off at 5am next morning. 8hr extraction.	3.7km SW Morazán		El Progreso	Guatemala	460m	14.9051	-90.1536	50m	Neotropical
CASENT0869159	JTL6022-s	Myrmicinae	Temnothorax	achii_sp_nov		1w	pin	goniops group		MMPC	LACM	paratype Temnothorax achii	M.M. Prebus	2021-01-01	J. Longino	2007-07-07		Winkler	tropical dry forest	ex sifted leaf litter	NOTEBY J. Longino, NOTEDATE 7-Jul-07: Winkler sample in small dry forest patch; driven to Schuster house, 3 mesh sacks hung by 9pm. Sample taken off at 5am next morning. 8hr extraction.	3.7km SW Morazán		El Progreso	Guatemala	460m	14.9051	-90.1536	50m	Neotropical
CASENT0869160	JTL6022-s	Myrmicinae	Temnothorax	achii_sp_nov		1w	pin	goniops group		MMPC	UVGC	paratype Temnothorax achii	M.M. Prebus	2021-01-01	J. Longino	2007-07-07		Winkler	tropical dry forest	ex sifted leaf litter	NOTEBY J. Longino, NOTEDATE 7-Jul-07: Winkler sample in small dry forest patch; driven to Schuster house, 3 mesh sacks hung by 9pm. Sample taken off at 5am next morning. 8hr extraction.	3.7km SW Morazán		El Progreso	Guatemala	460m	14.9051	-90.1536	50m	Neotropical
CASENT0758363	ANTC43710	Myrmicinae	Temnothorax	goniops		1w	pin	goniops group		MMPC	USNM				Jackson	1961-03-08								Chiapas	Mexico	2000m	16.4195	-92.5838	200km	Neotropical	coordinates, elevation, and errors estimated from label data	2000m
MCZENT00032436	ANTC43709	Myrmicinae	Temnothorax	goniops		2w	pin	goniops group		MMPC	MCZC	holotype of Leptothorax goniops (top) paratype of Leptothorax goniops (bottom)	C. Baroni-Urbani	1978	E.O. Wilson	1953-07-28			2nd growth thorn forest	strays		10km E Campeche		Campeche	Mexico	10m	19.826	-90.405	unknown	Neotropical	coordinates, elevation, and errors estimated from label data	5m
USNMENT00529517	ANTC43711	Myrmicinae	Temnothorax	huehuetenangoi		1w	pin	goniops group		MMPC	USNM	holotype of Leptothorax huehuetenangoi	C. Baroni-Urbani	1978	quarantine?	1946-04-11				Odontoglossum bictoniense	SF 20724 46-5347	San de Jose			Guatemala	10m	13.9286	-90.8377	500m	Neotropical	coordinates, elevation, and errors estimated from label data	5m
USNMENT00529550	ANTC43714	Myrmicinae	Temnothorax	ixili		1w, 1g	pin	goniops group		MMPC	USNM	holotype of Leptothorax ixili	C. Baroni-Urbani	1978	quarantine?	1946-04-30				Oncidium sp.	SF 20968 46-5352				Guatemala					Neotropical
CASENT0758364	SF20968 46-5352	Myrmicinae	Temnothorax	ixili		3w	pin	goniops group		MMPC	USNM	paratypes of Leptothorax ixili	C. Baroni-Urbani	1978	quarantine	1946-04-30				Oneidum sp.					Guatemala					Neotropical
LACMENT323191	ANTC43712	Myrmicinae	Temnothorax	ixili		3w	pin	goniops group		MMPC	LACM	paratypes of Temnothorax ixili	C. Baroni Urbani	1978		1946-04-30				Oncidium					Guatemala					Neotropical
MCZENT00581829	ANTC43713	Myrmicinae	Temnothorax	ixili		3w	pin	goniops group		MMPC	MCZC	paratypes of Temnothorax ixili	C. Baroni-Urbani	1978		1938-05-06				ex Oneidium sp.					Guatemala					Neotropical
CASENT0611673	JTL6795-s	Myrmicinae	Temnothorax	ixili		1w	pin	goniops group		MMPC	JTLC		J. Longino	2010-03-23	J. Longino	2009-06-28	2009-06-28	Winkler	stream gully in dry scrub	ex sifted leaf litter		7.5km NE Teculután		Zacapa	Guatemala	475m	15.0437	-89.675	30m	Neotropical
CASENT0611669	JTL6795-s	Myrmicinae	Temnothorax	ixili		1w	pin	goniops group		MMPC	JTLC		J. Longino	2010-03-23	J. Longino	2009-06-28	2009-06-28	Winkler	stream gully in dry scrub	ex sifted leaf litter		7.5km NE Teculután		Zacapa	Guatemala	475m	15.0437	-89.675	30m	Neotropical
CASENT0611665	JTL6795-s	Myrmicinae	Temnothorax	ixili		1w	pin	goniops group		MMPC	JTLC		J. Longino	2010-03-23	J. Longino	2009-06-28	2009-06-28	Winkler	stream gully in dry scrub	ex sifted leaf litter		7.5km NE Teculután		Zacapa	Guatemala	475m	15.0437	-89.675	30m	Neotropical
CASENT0611679	MGB1338	Myrmicinae	Temnothorax	ixili		1w	pin	goniops group		MMPC	JTLC		J. Longino	2010-03-23	C. Beza	2009-06-24	2009-06-24	MaxiWinkler	tropical thorn scrub	ex sifted leaf litter		16km SW Teculután		Zacapa	Guatemala	600m	14.8638	-89.788	57m	Neotropical
CASENT0611678	MGB1338	Myrmicinae	Temnothorax	ixili		1w	pin	goniops group		MMPC	JTLC		J. Longino	2010-03-23	C. Beza	2009-06-24	2009-06-24	MaxiWinkler	tropical thorn scrub	ex sifted leaf litter		16km SW Teculután		Zacapa	Guatemala	600m	14.8638	-89.788	57m	Neotropical
CASENT0732589	MGB1338	Myrmicinae	Temnothorax	ixili		1w	pin	goniops group	MMPDNA#P031	MMPC	UCDC		B. Boudinot	2012	C. Beza	2009-06-24	2009-06-24		tropical thorn scrub	ex sifted leaf litter		16km SW Teculután		Zacapa	Guatemala	600m	14.8638	-89.788	57m	Neotropical
JTL-SV00417.12	MGB1338	Myrmicinae	Temnothorax	ixili		1w	ethanol	goniops group		JTLC	JTLC		J. Longino	2010-03-23	C. Beza	2009-06-24	2009-06-24	MaxiWinkler	tropical thorn scrub	ex sifted leaf litter		16km SW Teculután		Zacapa	Guatemala	600m	14.8638	-89.788	57m	Neotropical
JTL280259	JTL6795-s	Myrmicinae	Temnothorax	ixili		1w	ethanol	goniops group		MMPC	JTLC		J. Longino	2010-03-23	J. Longino	2009-06-28	2009-06-28	Winkler	stream gully in dry scrub	ex sifted leaf litter		7.5km NE Teculután		Zacapa	Guatemala	475m	15.0437	-89.675	30m	Neotropical
JTL688881	MGB1338	Myrmicinae	Temnothorax	ixili		1w	ethanol	goniops group		MMPC	JTLC		B. Boudinot	2012-11-28	C. Beza	2009-06-24	2009-06-24	MaxiWinkler	tropical thorn scrub	ex sifted leaf litter		16km SW Teculután		Zacapa	Guatemala	600m	14.8638	-89.788	57m	Neotropical
CASENT0632983	MBI302	Myrmicinae	Temnothorax	xincai_sp_nov		1w	pin	goniops group		MMPC	CASC	holotype of Temnothorax xincai	M.M. Prebus	2021-01-01	M. Barrios & M. Bustamante	2014-04-19		Maxi Winkler	pine forest	ex sifted leaf litter		Volcán Tecuamburro		Santa Rosa	Guatemala	1469m	14.1509	-90.4143	20m	Neotropical		50m
CASENT0632988	MBI304	Myrmicinae	Temnothorax	xincai_sp_nov		1g	pin	goniops group		MMPC	CASC		M.M. Prebus	2021-01-01	M. Barrios & M. Bustamante	2014-04-19		Maxi Winkler	pine forest	ex sifted leaf litter		Volcán Tecuamburro		Santa Rosa	Guatemala	1462m	14.1516	-90.4128	20m	Neotropical		50m
CASENT0869157	MBI302	Myrmicinae	Temnothorax	xincai_sp_nov		1w	pin	goniops group		MMPC	USNM	paratype of Temnothorax xincai	M.M. Prebus	2021-01-01	M. Barrios & M. Bustamante	2014-04-19		Maxi Winkler	pine forest	ex sifted leaf litter		Volcán Tecuamburro		Santa Rosa	Guatemala	1469m	14.1509	-90.4143	20m	Neotropical		50m
CASENT0869158	MBI302	Myrmicinae	Temnothorax	xincai_sp_nov		1w	pin	goniops group		MMPC	MCZC	paratype of Temnothorax xincai	M.M. Prebus	2021-01-01	M. Barrios & M. Bustamante	2014-04-19		Maxi Winkler	pine forest	ex sifted leaf litter		Volcán Tecuamburro		Santa Rosa	Guatemala	1469m	14.1509	-90.4143	20m	Neotropical		50m
MCZENT00021003	ANTC43066	Myrmicinae	Temnothorax	androsanus		4w	pin	pastinifer group		MMPC	MCZC	lectotype Macromischa androsana (bottom) paralectotypes Macromischa androsana (top, middle top, middle bottom)	W.M. Wheeler		W.M. Wheeler	1904-05-01	1904-06-01			under dead palmetto leaves		Crawl Creek		Central Andros	Bahamas	5m	24.3652	-77.8644	100km	Neotropical	coordinates, elevation, and errors estimated from label data	5m
CASENT0758350	ANTC42943	Myrmicinae	Temnothorax	androsanus		3w	pin	pastinifer group	MMPDNA#P211	MMPC	MCZC		M.M. Prebus	2017-07-09	L. Morrison	1991-05-01	1991-05-31			leaf litter		Staniel Key		Exuma	Bahamas	5m	24.1706	-76.4392	1.8km	Neotropical	coordinates, elevation, and errors estimated from label data	5m
CASENT0915979	ANTC42943	Myrmicinae	Temnothorax	androsanus		2w	pin	pastinifer group	MMPDNA#P357	MMPC	UCDC		M.M. Prebus	2017-07-09	L. Morrison	1991-05-01	1991-05-31			leaf litter		Staniel Key		Exuma	Bahamas	5m	24.1706	-76.4392	1.8km	Neotropical	coordinates, elevation, and errors estimated from label data	5m
CASENT0914182	ANTC27925	Myrmicinae	Temnothorax	androsanus		1w	pin	pastinifer group		NHMUK	NHMUK		C. Baroni Urbani		L. Armas	1971-04-01						Cayo Caguama, Jardines da la Reina		Camagüey	Cuba	5m	20.592	-78.4202	unknown	Neotropical	Coordinates from Google Maps, Cayo Caguama
CASENT0633331	RSA2014-035	Myrmicinae	Temnothorax	androsanus_nr		1g	pin	pastinifer group		MMPC	JTLC		M.M. Prebus	2021-01-01	R.S. Anderson, F. Cala	2014-10-06			dry deciduous scrub forest	ex sifted leaf litter		Barrancas		Santiago de Cuba	Cuba	163m	20.377	-76.0296	unknown	Neotropical
CASENT0758267	ANTC43733	Myrmicinae	Temnothorax	mixed pin: pastinifer (top specimen), rutabulafer_sp_nov (bottom specimens)		3w	pin	pastinifer group		MMPC	USNM		M.M. Prebus	2021-01-01	W.M. Mann							Fresh Creek	Andros Isl.	North Andros	Bahamas	5m	24.7161	-77.8001	1km	Neotropical	coordinates, elevation, and errors estimated from label data	5m
MCZENT00577110	ANTC43728	Myrmicinae	Temnothorax	nigricans		3w	pin	pastinifer group		MMPC	MCZC	paralectotypes of Macromischa melanocephala	C. Baroni-Urbani	1978	J.G.Meyers	1929-10-05				nest in dead twig of Swietenia mahagoni on ground		Hacienda Jiqui, Ensenada de Cochinos		Artemisa	Cuba	5m	22.9336	-83.1471	13km	Neotropical	coordinates, elevation, and errors estimated from label data	5m
MCZENT00577111	ANTC43728	Myrmicinae	Temnothorax	nigricans		3w	pin	pastinifer group		MMPC	MCZC	lectotype of Macromischa melanocephala (middle) paralectotypes of Macromischa melanocephala (top and bottom)	C. Baroni-Urbani	1978	J.G.Meyers	1929-10-05				nest in dead twig of Swietenia mahagoni on ground		Hacienda Jiqui, Ensenada de Cochinos		Artemisa	Cuba	5m	22.9336	-83.1471	13km	Neotropical	coordinates, elevation, and errors estimated from label data	5m
MCZENT00577112	ANTC43728	Myrmicinae	Temnothorax	nigricans		2w	pin	pastinifer group		MMPC	MCZC	paralectotypes of Macromischa melanocephala	C. Baroni-Urbani	1978	J.G.Meyers	1929-10-05				nest in dead twig of Swietenia mahagoni on ground		Hacienda Jiqui, Ensenada de Cochinos		Artemisa	Cuba	5m	22.9336	-83.1471	13km	Neotropical	coordinates, elevation, and errors estimated from label data	5m
MCZENT00577113	ANTC43728	Myrmicinae	Temnothorax	nigricans		2g	pin	pastinifer group		MMPC	MCZC	paralectotypes of Macromischa melanocephala	C. Baroni-Urbani	1978	J.G.Meyers	1929-10-05				nest in dead twig of Swietenia mahagoni on ground		Hacienda Jiqui, Ensenada de Cochinos		Artemisa	Cuba	5m	22.9336	-83.1471	13km	Neotropical	coordinates, elevation, and errors estimated from label data	5m
MCZENT00577114	ANTC43728	Myrmicinae	Temnothorax	nigricans		3w	pin	pastinifer group		MMPC	MCZC	paralectotypes of Macromischa melanocephala	C. Baroni-Urbani	1978	J.G.Meyers	1929-10-05				nest in dead twig of Swietenia mahagoni on ground		Hacienda Jiqui, Ensenada de Cochinos		Artemisa	Cuba	5m	22.9336	-83.1471	13km	Neotropical	coordinates, elevation, and errors estimated from label data	5m
MCZENT00016365	ANTC43728	Myrmicinae	Temnothorax	nigricans		3w	pin	pastinifer group		MMPC	MCZC	paralectotypes of Macromischa melanocephala	C. Baroni-Urbani	1978	J.G.Meyers	1929-10-05				nest in dead twig of Swietenia mahagoni on ground		Hacienda Jiqui, Ensenada de Cochinos		Artemisa	Cuba	5m	22.9336	-83.1471	13km	Neotropical	coordinates, elevation, and errors estimated from label data	5m
CASENT0758264	ANTC43728	Myrmicinae	Temnothorax	nigricans		3w	pin	pastinifer group		MMPC	USNM	paralectotypes of Macromischa melanocephala	C. Baroni-Urbani	1978	J.G.Meyers	1929-10-05				nest in dead twig of Swietenia mahagoni on ground		Hacienda Jiqui, Ensenada de Cochinos		Artemisa	Cuba	5m	22.9336	-83.1471	13km	Neotropical	coordinates, elevation, and errors estimated from label data	5m
CASENT0758265	ANTC43728	Myrmicinae	Temnothorax	nigricans		3w	pin	pastinifer group	MMPDNA#P337 (top)	MMPC	USNM	paralectotypes of Macromischa melanocephala	C. Baroni-Urbani	1978	J.G.Meyers	1929-10-05				nest in dead twig of Swietenia mahagoni on ground		Hacienda Jiqui, Ensenada de Cochinos		Artemisa	Cuba	5m	22.9336	-83.1471	13km	Neotropical	coordinates, elevation, and errors estimated from label data	5m
CASENT0904718	ANTC24694	Myrmicinae	Temnothorax	pastinifer		1w	pin	pastinifer group		MSNG	MSNG	lectotype of Macromischa pastinifera			Pergande							Bahama Isola			Bahamas	5m	24.25	-76	unknown	Neotropical
CASENT0908986	ANTC31417	Myrmicinae	Temnothorax	pastinifer		1g	pin	pastinifer group		MHNG	MHNG	holotype of Macromischa lucayensis			Schmitt							Haiti, Bahamas			Bahamas	5m	24	-76	unknown	Neotropical
CASENT0758857	ANTC43874	Myrmicinae	Temnothorax	pastinifer		1g, 2w	pin	pastinifer group	MMPDNA#P787	MMPC	UCDC		M.M. Prebus	2021-01-01	J. Mangold	2005-01-29				in wood	site 37	Great Harbour Cay, Bamboo Cay		Berry Islands	Bahamas	10m	25.7488	-77.8668	minute	Neotropical	coordinates, elevation, and errors estimated from label data	10m
CASENT0758858	ANTC43874	Myrmicinae	Temnothorax	pastinifer		4w	pin	pastinifer group		MMPC	ABS		M.M. Prebus	2021-01-01	J. Mangold	2005-01-29				in wood	site 37	Great Harbour Cay, Bamboo Cay		Berry Islands	Bahamas	10m	25.7488	-77.8668	minute	Neotropical	coordinates, elevation, and errors estimated from label data	10m
CASENT0758859	ANTC43874	Myrmicinae	Temnothorax	pastinifer		1g, 3w	pin	pastinifer group		MMPC	ABS		M.M. Prebus	2021-01-01	J. Mangold	2005-01-29				in wood	site 37	Great Harbour Cay, Bamboo Cay		Berry Islands	Bahamas	10m	25.7488	-77.8668	minute	Neotropical	coordinates, elevation, and errors estimated from label data	10m
CASENT0758860	ANTC43874	Myrmicinae	Temnothorax	pastinifer		1g, 3w	pin	pastinifer group		MMPC	ABS		M.M. Prebus	2021-01-01	J. Mangold	2005-01-29				in wood	site 37	Great Harbour Cay, Bamboo Cay		Berry Islands	Bahamas	10m	25.7488	-77.8668	minute	Neotropical	coordinates, elevation, and errors estimated from label data	10m
CASENT0758861	ANTC43874	Myrmicinae	Temnothorax	pastinifer		1g, 3w	pin	pastinifer group		MMPC	ABS		M.M. Prebus	2021-01-01	J. Mangold	2005-01-29				in wood	site 37	Great Harbour Cay, Bamboo Cay		Berry Islands	Bahamas	10m	25.7488	-77.8668	minute	Neotropical	coordinates, elevation, and errors estimated from label data	10m
CASENT0758862	ANTC43874	Myrmicinae	Temnothorax	pastinifer		1g, 3w	pin	pastinifer group		MMPC	ABS		M.M. Prebus	2021-01-01	J. Mangold	2005-01-29				in wood	site 37	Great Harbour Cay, Bamboo Cay		Berry Islands	Bahamas	10m	25.7488	-77.8668	minute	Neotropical	coordinates, elevation, and errors estimated from label data	10m
CASENT0732596	ANTC43047	Myrmicinae	Temnothorax	pastinifer		1w	pin	pastinifer group	MMPDNA#P075	MMPC	UCDC		J. Plovia-Scott	2021-01-01	J. Plovia-Scott	2006-12-14	2006-12-14	hand collecting	littoral vegetation	ground forager		2km SE Georgetown		Exuma	Bahamas	10m	23.4833	-75.75	unknown	Neotropical
CASENT0106606	ANTC4024	Myrmicinae	Temnothorax	pastinifer		1w	pin	pastinifer group		MMPC	UCDC		J. Plovia-Scott	2021-01-01	J. Plovia-Scott	2006-12-14	2006-12-14	hand collecting	littoral vegetation	ground forager		2km SE Georgetown		Exuma	Bahamas	10m	23.4833	-75.75	unknown	Neotropical
CASENT0915977	ANTC4024	Myrmicinae	Temnothorax	pastinifer		3w	pin	pastinifer group		MMPC	UCDC		J. Plovia-Scott	2021-01-01	J. Plovia-Scott	2006-12-14	2006-12-14	hand collecting	littoral vegetation	ground forager		2km SE Georgetown		Exuma	Bahamas	10m	23.4833	-75.75	unknown	Neotropical
CASENT0758268	ANTC43736	Myrmicinae	Temnothorax	pastinifer		1w	pin	pastinifer group		MMPC	USNM		M.M. Prebus	2021-01-01	Wickham?							Water Cay		West Grand Bahama	Bahamas	5m	26.7648	-78.5001	1.6km	Neotropical	coordinates, elevation, and errors estimated from label data	5m
CASENT0758269	ANTC43736	Myrmicinae	Temnothorax	pastinifer		1w	pin	pastinifer group		MMPC	USNM		M.M. Prebus	2021-01-01	Wickham?							Water Cay		West Grand Bahama	Bahamas	5m	26.7648	-78.5001	1.6km	Neotropical	coordinates, elevation, and errors estimated from label data	5m
CASENT0901798	ANTC21220	Myrmicinae	Temnothorax	pastinifer		1w	pin	pastinifer group		NHMUK	NHMUK	paratype of Leptothorax pastoris			I. Garcia	1972-01-01						Siboney		Santiago de Cuba	Cuba	20m	19.9603	-75.7081		Neotropical
CASENT0869170	ANTC43733	Myrmicinae	Temnothorax	pastinifer		2w	pin	pastinifer group		MMPC	USNM		M.M. Prebus	2021-01-01	W.M. Mann							Fresh Creek	Andros Isl.	North Andros	Bahamas	5m	24.7161	-77.8001	1km	Neotropical	coordinates, elevation, and errors estimated from label data	5m
CASENT0758266	ANTC43734	Myrmicinae	Temnothorax	rutabulafer_sp_nov		3w	pin	pastinifer group		MMPC	USNM	holotype of Temnothorax rutabulafer (middle) paratypes of Temnothorax rutabulafer (top and bottom)	M.M. Prebus	2021-01-01	W.S. Creighton	1927-11-20						Soledad		Cienfuegos	Cuba	70m	22.1237	-80.3376	20km	Neotropical	coordinates, elevation, and errors estimated from label data	70m
CASENT0758230	ANTC43735	Myrmicinae	Temnothorax	rutabulafer_sp_nov		1g, 1m, 1w	pin	pastinifer group	MMPDNA#P789	MMPC	USNM	paratypes of Temnothorax rutabulafer	M.M. Prebus	2021-01-01	W.S. Creighton	1927-11-08						Soledad		Cienfuegos	Cuba	70m	22.1237	-80.3376	20km	Neotropical	coordinates, elevation, and errors estimated from label data	70m
CASENT0758277	ANTC43734	Myrmicinae	Temnothorax	rutabulafer_sp_nov		3w	pin	pastinifer group		MMPC	USNM	paratypes of Temnothorax rutabulafer	M.M. Prebus	2021-01-01	W.S. Creighton	1927-11-20						Soledad		Cienfuegos	Cuba	70m	22.1237	-80.3376	20km	Neotropical	coordinates, elevation, and errors estimated from label data	70m
CASENT0758278	ANTC43734	Myrmicinae	Temnothorax	rutabulafer_sp_nov		2w	pin	pastinifer group		MMPC	USNM	paratypes of Temnothorax rutabulafer	M.M. Prebus	2021-01-01	W.S. Creighton	1927-11-20						Soledad		Cienfuegos	Cuba	70m	22.1237	-80.3376	20km	Neotropical	coordinates, elevation, and errors estimated from label data	70m
CASENT0758279	ANTC43734	Myrmicinae	Temnothorax	rutabulafer_sp_nov		3w	pin	pastinifer group		MMPC	USNM	paratypes of Temnothorax rutabulafer	M.M. Prebus	2021-01-01	W.S. Creighton	1927-11-20						Soledad		Cienfuegos	Cuba	70m	22.1237	-80.3376	20km	Neotropical	coordinates, elevation, and errors estimated from label data	70m
CASENT0758286	ANTC43734	Myrmicinae	Temnothorax	rutabulafer_sp_nov		3w	pin	pastinifer group		MMPC	USNM	paratypes of Temnothorax rutabulafer	M.M. Prebus	2021-01-01	W.S. Creighton	1927-11-20						Soledad		Cienfuegos	Cuba	70m	22.1237	-80.3376	20km	Neotropical	coordinates, elevation, and errors estimated from label data	70m
CASENT0758287	ANTC43735	Myrmicinae	Temnothorax	rutabulafer_sp_nov		3w	pin	pastinifer group		MMPC	USNM	paratypes of Temnothorax rutabulafer	M.M. Prebus	2021-01-01	W.S. Creighton	1927-11-08						Soledad		Cienfuegos	Cuba	70m	22.1237	-80.3376	20km	Neotropical	coordinates, elevation, and errors estimated from label data	70m
CASENT0758288	ANTC43734	Myrmicinae	Temnothorax	rutabulafer_sp_nov		3w	pin	pastinifer group		MMPC	USNM	paratypes of Temnothorax rutabulafer	M.M. Prebus	2021-01-01	W.S. Creighton	1927-11-20						Soledad		Cienfuegos	Cuba	70m	22.1237	-80.3376	20km	Neotropical	coordinates, elevation, and errors estimated from label data	70m
CASENT0758289	ANTC43734	Myrmicinae	Temnothorax	rutabulafer_sp_nov		3w	pin	pastinifer group		MMPC	USNM	paratypes of Temnothorax rutabulafer	M.M. Prebus	2021-01-01	W.S. Creighton							Soledad		Cienfuegos	Cuba	70m	22.1237	-80.3376	20km	Neotropical	coordinates, elevation, and errors estimated from label data	70m
CASENT0758280	ANTC43734	Myrmicinae	Temnothorax	rutabulafer_sp_nov		3w	pin	pastinifer group		MMPC	USNM	paratypes of Temnothorax rutabulafer	M.M. Prebus	2021-01-01	W.S. Creighton	1927-11-20						Soledad		Cienfuegos	Cuba	70m	22.1237	-80.3376	20km	Neotropical	coordinates, elevation, and errors estimated from label data	70m
CASENT0758281	ANTC43734	Myrmicinae	Temnothorax	rutabulafer_sp_nov		3w	pin	pastinifer group		MMPC	USNM	paratypes of Temnothorax rutabulafer	M.M. Prebus	2021-01-01	W.S. Creighton	1927-11-20						Soledad		Cienfuegos	Cuba	70m	22.1237	-80.3376	20km	Neotropical	coordinates, elevation, and errors estimated from label data	70m
CASENT0758282	ANTC43734	Myrmicinae	Temnothorax	rutabulafer_sp_nov		3w	pin	pastinifer group		MMPC	USNM	paratypes of Temnothorax rutabulafer	M.M. Prebus	2021-01-01	W.S. Creighton	1927-11-20						Soledad		Cienfuegos	Cuba	70m	22.1237	-80.3376	20km	Neotropical	coordinates, elevation, and errors estimated from label data	70m
CASENT0758283	ANTC43734	Myrmicinae	Temnothorax	rutabulafer_sp_nov		3w	pin	pastinifer group		MMPC	USNM	paratypes of Temnothorax rutabulafer	M.M. Prebus	2021-01-01	W.S. Creighton	1927-11-20						Soledad		Cienfuegos	Cuba	70m	22.1237	-80.3376	20km	Neotropical	coordinates, elevation, and errors estimated from label data	70m
CASENT0758284	ANTC43734	Myrmicinae	Temnothorax	rutabulafer_sp_nov		3w	pin	pastinifer group		MMPC	USNM	paratypes of Temnothorax rutabulafer	M.M. Prebus	2021-01-01	W.S. Creighton	1927-11-20						Soledad		Cienfuegos	Cuba	70m	22.1237	-80.3376	20km	Neotropical	coordinates, elevation, and errors estimated from label data	70m
CASENT0758285	ANTC43734	Myrmicinae	Temnothorax	rutabulafer_sp_nov		3w	pin	pastinifer group		MMPC	USNM	paratypes of Temnothorax rutabulafer	M.M. Prebus	2021-01-01	W.S. Creighton	1927-11-20						Soledad		Cienfuegos	Cuba	70m	22.1237	-80.3376	20km	Neotropical	coordinates, elevation, and errors estimated from label data	70m
MCZENT00581833	ANTC43734	Myrmicinae	Temnothorax	rutabulafer_sp_nov		3w	pin	pastinifer group		MMPC	MCZC	paratypes of Temnothorax rutabulafer	M.M. Prebus	2021-01-01	W.S. Creighton	1927-11-20						Soledad		Cienfuegos	Cuba	70m	22.1237	-80.3376	20km	Neotropical	coordinates, elevation, and errors estimated from label data	70m
CASENT0758274	ANTC43737	Myrmicinae	Temnothorax	rutabulafer_sp_nov		1w	pin	pastinifer group		MMPC	USNM		M.M. Prebus	2021-01-01	C. Cazier & P. Vaurie	1951-05-01	1951-05-31					South Bimini Isl.		Bimini	Bahamas	5m	25.7009	-79.2761	3.2km	Neotropical	coordinates, elevation, and errors estimated from label data	5m
CASENT0758275	ANTC43737	Myrmicinae	Temnothorax	rutabulafer_sp_nov		1w	pin	pastinifer group		MMPC	USNM		M.M. Prebus	2021-01-01	C. Cazier & P. Vaurie	1951-05-01	1951-05-31					South Bimini Isl.		Bimini	Bahamas	5m	25.7009	-79.2761	3.2km	Neotropical	coordinates, elevation, and errors estimated from label data	5m
CASENT0756085	ANTC43737	Myrmicinae	Temnothorax	rutabulafer_sp_nov		1m	pin	pastinifer group		MMPC	USNM		M.M. Prebus	2021-01-01	C. Cazier & P. Vaurie	1951-06-01	1951-06-30					South Bimini Isl.		Bimini	Bahamas	5m	25.7009	-79.2761	3.2km	Neotropical	coordinates, elevation, and errors estimated from label data	5m
CASENT0758270	ANTC43737	Myrmicinae	Temnothorax	rutabulafer_sp_nov		1w	pin	pastinifer group		MMPC	USNM		M.M. Prebus	2021-01-01	C. Cazier & P. Vaurie	1951-06-01	1951-06-30					South Bimini Isl.		Bimini	Bahamas	5m	25.7009	-79.2761	3.2km	Neotropical	coordinates, elevation, and errors estimated from label data	5m
CASENT0758272	ANTC43737	Myrmicinae	Temnothorax	rutabulafer_sp_nov		1w	pin	pastinifer group		MMPC	USNM		M.M. Prebus	2021-01-01	C. Cazier & P. Vaurie	1951-06-01	1951-06-30					South Bimini Isl.		Bimini	Bahamas	5m	25.7009	-79.2761	3.2km	Neotropical	coordinates, elevation, and errors estimated from label data	5m
CASENT0756086	ANTC43737	Myrmicinae	Temnothorax	rutabulafer_sp_nov		1g	pin	pastinifer group	MMPDNA#P788	MMPC	USNM		M.M. Prebus	2021-01-01	C. Cazier & P. Vaurie	1951-06-01	1951-06-30					South Bimini Isl.		Bimini	Bahamas	5m	25.7009	-79.2761	3.2km	Neotropical	coordinates, elevation, and errors estimated from label data	5m
CASENT0758276	ANTC43737	Myrmicinae	Temnothorax	rutabulafer_sp_nov		1w	pin	pastinifer group		MMPC	USNM		M.M. Prebus	2021-01-01	C. Cazier & P. Vaurie	1951-07-01	1951-07-31					South Bimini Isl.		Bimini	Bahamas	5m	25.7009	-79.2761	3.2km	Neotropical	coordinates, elevation, and errors estimated from label data	5m
CASENT0758273	ANTC43737	Myrmicinae	Temnothorax	rutabulafer_sp_nov		1w	pin	pastinifer group		MMPC	USNM		M.M. Prebus	2021-01-01	C. Cazier & P. Vaurie	1951-07-01	1951-07-31					South Bimini Isl.		Bimini	Bahamas	5m	25.7009	-79.2761	3.2km	Neotropical	coordinates, elevation, and errors estimated from label data	5m
CASENT0758271	ANTC43737	Myrmicinae	Temnothorax	rutabulafer_sp_nov		1w	pin	pastinifer group		MMPC	USNM		M.M. Prebus	2021-01-01	C. Cazier & P. Vaurie	1951-07-01	1951-07-31					South Bimini Isl.		Bimini	Bahamas	5m	25.7009	-79.2761	3.2km	Neotropical	coordinates, elevation, and errors estimated from label data	5m
MCZENT00581832	ANTC43733	Myrmicinae	Temnothorax	rutabulafer_sp_nov		1w	pin	pastinifer group		MMPC	MCZC		M.M. Prebus	2021-01-01	W.M. Mann							Fresh Creek	Andros Island	North Andros	Bahamas	5m	24.7161	-77.8001	1km	Neotropical	coordinates, elevation, and errors estimated from label data	5m
CASENT0758267	ANTC43733	Myrmicinae	Temnothorax	rutabulafer_sp_nov		1w	pin	pastinifer group		MMPC	USNM		M.M. Prebus	2021-01-01	W.M. Mann							Fresh Creek	Andros Isl.	North Andros	Bahamas	5m	24.7161	-77.8001	1km	Neotropical	coordinates, elevation, and errors estimated from label data	5m
CASENT0758831	ANTC43837	Myrmicinae	Temnothorax	rutabulafer_sp_nov		1g, 4w	pin	pastinifer group	MMPDNA#P334	MMPC	UCDC		M.M. Prebus	2021-01-01	M. Deyrup & L. Davis	1996-11-14			dense unburned coppice	nest in 2cm twig on ground	site B	north of Stafford Creek bridge, west side of road, rocky hill in from road		North Andros	Bahamas	15m	24.9026	-77.9407	minute	Neotropical	coordinates, elevation, and errors estimated from label data	15m
CASENT0758832	ANTC43837	Myrmicinae	Temnothorax	rutabulafer_sp_nov		5w	pin	pastinifer group		MMPC	ABS		M.M. Prebus	2021-01-01	M. Deyrup & L. Davis	1996-11-14			dense unburned coppice	nest in 2cm twig on ground	site B	north of Stafford Creek bridge, west side of road, rocky hill in from road		North Andros	Bahamas	15m	24.9026	-77.9407	minute	Neotropical	coordinates, elevation, and errors estimated from label data	15m
CASENT0758833	ANTC43837	Myrmicinae	Temnothorax	rutabulafer_sp_nov		5w	pin	pastinifer group		MMPC	ABS		M.M. Prebus	2021-01-01	M. Deyrup & L. Davis	1996-11-14			dense unburned coppice	nest in 2cm twig on ground	site B	north of Stafford Creek bridge, west side of road, rocky hill in from road		North Andros	Bahamas	15m	24.9026	-77.9407	minute	Neotropical	coordinates, elevation, and errors estimated from label data	15m
CASENT0758834	ANTC43837	Myrmicinae	Temnothorax	rutabulafer_sp_nov		5w	pin	pastinifer group		MMPC	ABS		M.M. Prebus	2021-01-01	M. Deyrup & L. Davis	1996-11-14			dense unburned coppice	nest in 2cm twig on ground	site B	north of Stafford Creek bridge, west side of road, rocky hill in from road		North Andros	Bahamas	15m	24.9026	-77.9407	minute	Neotropical	coordinates, elevation, and errors estimated from label data	15m
CASENT0758835	ANTC43837	Myrmicinae	Temnothorax	rutabulafer_sp_nov		5w	pin	pastinifer group		MMPC	ABS		M.M. Prebus	2021-01-01	M. Deyrup & L. Davis	1996-11-14			dense unburned coppice	nest in 2cm twig on ground	site B	north of Stafford Creek bridge, west side of road, rocky hill in from road		North Andros	Bahamas	15m	24.9026	-77.9407	minute	Neotropical	coordinates, elevation, and errors estimated from label data	15m
CASENT0758836	ANTC43837	Myrmicinae	Temnothorax	rutabulafer_sp_nov		5w	pin	pastinifer group		MMPC	ABS		M.M. Prebus	2021-01-01	M. Deyrup & L. Davis	1996-11-14			dense unburned coppice	nest in 2cm twig on ground	site B	north of Stafford Creek bridge, west side of road, rocky hill in from road		North Andros	Bahamas	15m	24.9026	-77.9407	minute	Neotropical	coordinates, elevation, and errors estimated from label data	15m
CASENT0758837	ANTC43837	Myrmicinae	Temnothorax	rutabulafer_sp_nov		5w	pin	pastinifer group		MMPC	ABS		M.M. Prebus	2021-01-01	M. Deyrup & L. Davis	1996-11-14			dense unburned coppice	nest in 2cm twig on ground	site B	north of Stafford Creek bridge, west side of road, rocky hill in from road		North Andros	Bahamas	15m	24.9026	-77.9407	minute	Neotropical	coordinates, elevation, and errors estimated from label data	15m
CASENT0758838	ANTC43837	Myrmicinae	Temnothorax	rutabulafer_sp_nov		1g, 4w	pin	pastinifer group		MMPC	ABS		M.M. Prebus	2021-01-01	M. Deyrup & L. Davis	1996-11-14			dense unburned coppice	nest in 2cm twig on ground	site B	north of Stafford Creek bridge, west side of road, rocky hill in from road		North Andros	Bahamas	15m	24.9026	-77.9407	minute	Neotropical	coordinates, elevation, and errors estimated from label data	15m
CASENT0758839	ANTC43837	Myrmicinae	Temnothorax	rutabulafer_sp_nov		5w	pin	pastinifer group		MMPC	ABS		M.M. Prebus	2021-01-01	M. Deyrup & L. Davis	1996-11-14			dense unburned coppice	nest in 2cm twig on ground	site B	north of Stafford Creek bridge, west side of road, rocky hill in from road		North Andros	Bahamas	15m	24.9026	-77.9407	minute	Neotropical	coordinates, elevation, and errors estimated from label data	15m
CASENT0758840	ANTC43837	Myrmicinae	Temnothorax	rutabulafer_sp_nov		5w	pin	pastinifer group		MMPC	ABS		M.M. Prebus	2021-01-01	M. Deyrup & L. Davis	1996-11-14			dense unburned coppice	nest in 2cm twig on ground	site B	north of Stafford Creek bridge, west side of road, rocky hill in from road		North Andros	Bahamas	15m	24.9026	-77.9407	minute	Neotropical	coordinates, elevation, and errors estimated from label data	15m
CASENT0758841	ANTC43837	Myrmicinae	Temnothorax	rutabulafer_sp_nov		5w	pin	pastinifer group		MMPC	ABS		M.M. Prebus	2021-01-01	M. Deyrup & L. Davis	1996-11-14			dense unburned coppice	nest in 2cm twig on ground	site B	north of Stafford Creek bridge, west side of road, rocky hill in from road		North Andros	Bahamas	15m	24.9026	-77.9407	minute	Neotropical	coordinates, elevation, and errors estimated from label data	15m
CASENT0758842	ANTC43837	Myrmicinae	Temnothorax	rutabulafer_sp_nov		5w	pin	pastinifer group		MMPC	ABS		M.M. Prebus	2021-01-01	M. Deyrup & L. Davis	1996-11-14			dense unburned coppice	nest in 2cm twig on ground	site B	north of Stafford Creek bridge, west side of road, rocky hill in from road		North Andros	Bahamas	15m	24.9026	-77.9407	minute	Neotropical	coordinates, elevation, and errors estimated from label data	15m
CASENT0758843	ANTC43837	Myrmicinae	Temnothorax	rutabulafer_sp_nov		5w	pin	pastinifer group		MMPC	ABS		M.M. Prebus	2021-01-01	M. Deyrup & L. Davis	1996-11-14			dense unburned coppice	nest in 2cm twig on ground	site B	north of Stafford Creek bridge, west side of road, rocky hill in from road		North Andros	Bahamas	15m	24.9026	-77.9407	minute	Neotropical	coordinates, elevation, and errors estimated from label data	15m
CASENT0758844	ANTC43837	Myrmicinae	Temnothorax	rutabulafer_sp_nov		5w	pin	pastinifer group		MMPC	ABS		M.M. Prebus	2021-01-01	M. Deyrup & L. Davis	1996-11-14			dense unburned coppice	nest in 2cm twig on ground	site B	north of Stafford Creek bridge, west side of road, rocky hill in from road		North Andros	Bahamas	15m	24.9026	-77.9407	minute	Neotropical	coordinates, elevation, and errors estimated from label data	15m
CASENT0758845	ANTC43837	Myrmicinae	Temnothorax	rutabulafer_sp_nov		5w	pin	pastinifer group		MMPC	ABS		M.M. Prebus	2021-01-01	M. Deyrup & L. Davis	1996-11-14			dense unburned coppice	nest in 2cm twig on ground	site B	north of Stafford Creek bridge, west side of road, rocky hill in from road		North Andros	Bahamas	15m	24.9026	-77.9407	minute	Neotropical	coordinates, elevation, and errors estimated from label data	15m
CASENT0758846	ANTC43837	Myrmicinae	Temnothorax	rutabulafer_sp_nov		5w	pin	pastinifer group		MMPC	ABS		M.M. Prebus	2021-01-01	M. Deyrup & L. Davis	1996-11-14			dense unburned coppice	nest in 2cm twig on ground	site B	north of Stafford Creek bridge, west side of road, rocky hill in from road		North Andros	Bahamas	15m	24.9026	-77.9407	minute	Neotropical	coordinates, elevation, and errors estimated from label data	15m
CASENT0758847	ANTC46156	Myrmicinae	Temnothorax	rutabulafer_sp_nov		1g, 4w	pin	pastinifer group		MMPC	ABS		M.M. Prebus	2021-01-01	M. Deyrup & L. Davis	1996-11-14			roadside coppice	in small branch on ground		1 mi. N. of Forfar		North Andros	Bahamas	15m	24.9084	-77.9437	minute	Neotropical	coordinates, elevation, and errors estimated from label data	15m
CASENT0758848	ANTC46156	Myrmicinae	Temnothorax	rutabulafer_sp_nov		4w	pin	pastinifer group		MMPC	ABS		M.M. Prebus	2021-01-01	M. Deyrup & L. Davis	1996-11-14			roadside coppice	in small branch on ground		1 mi. N. of Forfar		North Andros	Bahamas	15m	24.9084	-77.9437	minute	Neotropical	coordinates, elevation, and errors estimated from label data	15m
CASENT0758849	ANTC46156	Myrmicinae	Temnothorax	rutabulafer_sp_nov		4w	pin	pastinifer group		MMPC	ABS		M.M. Prebus	2021-01-01	M. Deyrup & L. Davis	1996-11-14			roadside coppice	in small branch on ground		1 mi. N. of Forfar		North Andros	Bahamas	15m	24.9084	-77.9437	minute	Neotropical	coordinates, elevation, and errors estimated from label data	15m
CASENT0758850	ANTC46156	Myrmicinae	Temnothorax	rutabulafer_sp_nov		4w	pin	pastinifer group		MMPC	ABS		M.M. Prebus	2021-01-01	M. Deyrup & L. Davis	1996-11-14			roadside coppice	in small branch on ground		1 mi. N. of Forfar		North Andros	Bahamas	15m	24.9084	-77.9437	minute	Neotropical	coordinates, elevation, and errors estimated from label data	15m
CASENT0758851	ANTC46156	Myrmicinae	Temnothorax	rutabulafer_sp_nov		4w	pin	pastinifer group		MMPC	ABS		M.M. Prebus	2021-01-01	M. Deyrup & L. Davis	1996-11-14			roadside coppice	in small branch on ground		1 mi. N. of Forfar		North Andros	Bahamas	15m	24.9084	-77.9437	minute	Neotropical	coordinates, elevation, and errors estimated from label data	15m
CASENT0758852	ANTC46156	Myrmicinae	Temnothorax	rutabulafer_sp_nov		4w	pin	pastinifer group		MMPC	ABS		M.M. Prebus	2021-01-01	M. Deyrup & L. Davis	1996-11-14			roadside coppice	in small branch on ground		1 mi. N. of Forfar		North Andros	Bahamas	15m	24.9084	-77.9437	minute	Neotropical	coordinates, elevation, and errors estimated from label data	15m
CASENT0758853	ANTC46157	Myrmicinae	Temnothorax	rutabulafer_sp_nov		4w	pin	pastinifer group		MMPC	ABS		M.M. Prebus	2021-01-01	M. Deyrup & L. Davis	1996-11-17			dense unburned coppice	nest in 2cm twig on ground	site B	north of Stafford Creek bridge, west side of road, rocky hill in from road		North Andros	Bahamas	15m	24.9026	-77.9407	minute	Neotropical	coordinates, elevation, and errors estimated from label data	15m
CASENT0758854	ANTC46157	Myrmicinae	Temnothorax	rutabulafer_sp_nov		4w	pin	pastinifer group		MMPC	ABS		M.M. Prebus	2021-01-01	M. Deyrup & L. Davis	1996-11-17			dense unburned coppice	nest in 2cm twig on ground	site B	north of Stafford Creek bridge, west side of road, rocky hill in from road		North Andros	Bahamas	15m	24.9026	-77.9407	minute	Neotropical	coordinates, elevation, and errors estimated from label data	15m
CASENT0758855	ANTC46157	Myrmicinae	Temnothorax	rutabulafer_sp_nov		4w	pin	pastinifer group		MMPC	ABS		M.M. Prebus	2021-01-01	M. Deyrup & L. Davis	1996-11-17			dense unburned coppice	nest in 2cm twig on ground	site B	north of Stafford Creek bridge, west side of road, rocky hill in from road		North Andros	Bahamas	15m	24.9026	-77.9407	minute	Neotropical	coordinates, elevation, and errors estimated from label data	15m
CASENT0758856	ANTC46157	Myrmicinae	Temnothorax	rutabulafer_sp_nov		3w	pin	pastinifer group		MMPC	ABS		M.M. Prebus	2021-01-01	M. Deyrup & L. Davis	1996-11-17			dense unburned coppice	nest in 2cm twig on ground	site B	north of Stafford Creek bridge, west side of road, rocky hill in from road		North Andros	Bahamas	15m	24.9026	-77.9407	minute	Neotropical	coordinates, elevation, and errors estimated from label data	15m
MCZENT00581834	ANTC43730	Myrmicinae	Temnothorax	rutabulafer_sp_nov		1w	pin	pastinifer group		MMPC	MCZC		M.M. Prebus	2021-01-01	E.O. Wilson	1953-07-22		Berlese funnel				Blanco's Woods	Soledad L.V.	Cienfuegos	Cuba	70m	22.1237	-80.3376	20km	Neotropical	coordinates, elevation, and errors estimated from label data	70m
MCZENT00581835	ANTC43731	Myrmicinae	Temnothorax	rutabulafer_sp_nov		3w	pin	pastinifer group		MMPC	MCZC		M.M. Prebus	2021-01-01	E.O. Wilson	1953-06-22		Berlese funnel				Blanco's Woods	Soledad L.V.	Cienfuegos	Cuba	70m	22.1237	-80.3376	20km	Neotropical	coordinates, elevation, and errors estimated from label data	70m
MCZENT00581836	ANTC43732	Myrmicinae	Temnothorax	rutabulafer_sp_nov		1w	pin	pastinifer group		MMPC	MCZC		M.M. Prebus	2021-01-01	E.O. Wilson	1953-06-12						Blanco's Woods	Soledad L.V.	Cienfuegos	Cuba	70m	22.1237	-80.3376	20km	Neotropical	coordinates, elevation, and errors estimated from label data	70m
CASENT0759978	ANTC43734	Myrmicinae	Temnothorax	rutabulafer_sp_nov		1g, 3w	pin	pastinifer group		MMPC	FSCA		M.M. Prebus	2021-01-01	W.S. Creighton	1927-11-18						Soledad		Cienfuegos	Cuba	70m	22.1237	-80.3376	20km	Neotropical	coordinates, elevation, and errors estimated from label data	70m
USNMENT00532012	ANTC43762	Myrmicinae	Temnothorax	schwarzi		1g	pin	pastinifer group		MMPC	USNM	holotype of Macromischa schwarzi			E.A. Schwarz	unknown						Cayamas		Artemisa	Cuba	5m	22.6787	-82.553	1.5km	Neotropical	coordinates, elevation, and errors estimated from label data	5m
CASENT0636947	GUAT1F15188	Myrmicinae	Temnothorax	bison_sp_nov		1w	pin	pergandei group		MMPC	CASC	holotype of Temnothorax bison	M.M. Prebus	2021-01-01	Z. Falin	2015-06-18	2015-06-21	flight intercept trap	dry thorn scrub forest	flight intercept trap		Zacapa, finca nr. Univ. Landivar campus		Zacapa	Guatemala	200m	14.9934	-89.5461	unknown	Neotropical
CASENT0636946	GUAT1F15188	Myrmicinae	Temnothorax	bison_sp_nov		1w	pin	pergandei group		MMPC	UCDC	paratype of Temnothorax bison	M.M. Prebus	2021-01-01	Z. Falin	2015-06-18	2015-06-21	flight intercept trap	dry thorn scrub forest	flight intercept trap		Zacapa, finca nr. Univ. Landivar campus		Zacapa	Guatemala	200m	14.9934	-89.5461	unknown	Neotropical
JTLC000010341	JTL6021-s	Myrmicinae	Temnothorax	bison_sp_nov		1w	pin	pergandei group		MMPC	JTLC		M.M. Prebus	2021-01-01	J. Longino	2007-07-07		search	scrubby xeric vegetation	on ground	NOTEBY J. Longino, NOTEDATE 7-Jul-07: Strays from near paved road edge; open scrub and soft serpentine soil. Bank at edge of road looked like rock but easily crumbled.	3.7km SW Morazán		El Progreso	Guatemala	530m	14.9073	-90.1548	20m	Neotropical
JTLC000010340	JTL6021-s	Myrmicinae	Temnothorax	bison_sp_nov		1w	pin	pergandei group		MMPC	UVGC		M.M. Prebus	2021-01-01	J. Longino	2007-07-07		search	scrubby xeric vegetation	on ground	NOTEBY J. Longino, NOTEDATE 7-Jul-07: Strays from near paved road edge; open scrub and soft serpentine soil. Bank at edge of road looked like rock but easily crumbled.	3.7km SW Morazán		El Progreso	Guatemala	530m	14.9073	-90.1548	20m	Neotropical
CASENT0915984	AW2082	Myrmicinae	Temnothorax	bison_sp_nov		1w	pin	pergandei group		MMPC	USNM		M.M. Prebus	2021-01-01	A.L. Wild	2003-11-17			tropical dry forest			5km W El Rancho		El Progreso	Guatemala	400m	14.9167	-90.0667	unknown	Neotropical
MCZENT00541468	ANTC43750	Myrmicinae	Temnothorax	bison_sp_nov		1w	pin	pergandei group		MMPC	MCZC		M.M. Prebus	2021-01-01	J.E. Rawlins	1978-08-28		hand collecting				Yaxoquintela		Chiapas	Mexico	560	16.9667	-91.7833		Neotropical
CASENT0619615	JTL7396	Myrmicinae	Temnothorax	bison_sp_nov		1w	pin	pergandei group	CCDB-11393 E04; MMPDNA#P001	MMPC	UCDC		M.M. Prebus	2021-01-01	J. Longino	2011-04-23	2011-04-23	bait	dry oak woodland	at bait		8km S Somoto		Madriz	Nicaragua	1260m	13.407	-86.5911	50m	Neotropical
CASENT0619345	JTL7396	Myrmicinae	Temnothorax	bison_sp_nov		1w	pin	pergandei group		MMPC	LACM		M.M. Prebus	2021-01-01	J. Longino	2011-04-23	2011-04-23	baiting	dry oak woodland	at bait		8km S Somoto		Madriz	Nicaragua	1260m	13.407	-86.5911	unknown	Neotropical
USNMENT00922524	ANTC43747	Myrmicinae	Temnothorax	pergandei		1w	pin	pergandei group		MMPC	USNM	lectotype of Leptothorax (Dichothorax) pergandei	C. Emery	1895		"9.10"						Washington	Washington	District of Columbia	United States	40m	38.909	-77.037	9km	Nearctic	coordinates, elevation, and errors estimated from label data	20m
USNMENT00922508	ANTC43747	Myrmicinae	Temnothorax	pergandei		1w	pin	pergandei group		MMPC	USNM	paralectotype of Temnothorax (Dichothorax) pergandei	C. Emery	1895		"9.10"						Washington	Washington	District of Columbia	United States	40m	38.909	-77.037	9km	Nearctic	coordinates, elevation, and errors estimated from label data	20m
USNMENT00922509	ANTC43747	Myrmicinae	Temnothorax	pergandei		1w	pin	pergandei group		MMPC	USNM	paralectotype of Temnothorax (Dichothorax) pergandei	C. Emery	1895		"9.10"						Washington	Washington	District of Columbia	United States	40m	38.909	-77.037	9km	Nearctic	coordinates, elevation, and errors estimated from label data	20m
USNMENT00922515	ANTC43747	Myrmicinae	Temnothorax	pergandei		1w	pin	pergandei group		MMPC	USNM	paralectotype of Temnothorax (Dichothorax) pergandei	C. Emery	1895		"9.10"						Washington	Washington	District of Columbia	United States	40m	38.909	-77.037	9km	Nearctic	coordinates, elevation, and errors estimated from label data	20m
USNMENT00922517	ANTC43747	Myrmicinae	Temnothorax	pergandei		1w	pin	pergandei group		MMPC	USNM	paralectotype of Temnothorax (Dichothorax) pergandei	C. Emery	1895		"9.10"						Washington	Washington	District of Columbia	United States	40m	38.909	-77.037	9km	Nearctic	coordinates, elevation, and errors estimated from label data	20m
USNMENT00922518	ANTC43747	Myrmicinae	Temnothorax	pergandei		1w	pin	pergandei group		MMPC	USNM	paralectotype of Temnothorax (Dichothorax) pergandei	C. Emery	1895		"9.10"						Washington	Washington	District of Columbia	United States	40m	38.909	-77.037	9km	Nearctic	coordinates, elevation, and errors estimated from label data	20m
USNMENT00922510	ANTC43747	Myrmicinae	Temnothorax	pergandei		1w	pin	pergandei group		MMPC	USNM	paralectotype of Temnothorax (Dichothorax) pergandei	C. Emery	1895		"9.10"						Washington	Washington	District of Columbia	United States	40m	38.909	-77.037	9km	Nearctic	coordinates, elevation, and errors estimated from label data	20m
USNMENT00922511	ANTC43747	Myrmicinae	Temnothorax	pergandei		1w	pin	pergandei group		MMPC	USNM	paralectotype of Temnothorax (Dichothorax) pergandei	C. Emery	1895		"9.10"						Washington	Washington	District of Columbia	United States	40m	38.909	-77.037	9km	Nearctic	coordinates, elevation, and errors estimated from label data	20m
USNMENT00922522	ANTC43747	Myrmicinae	Temnothorax	pergandei		1w	pin	pergandei group		MMPC	USNM	paralectotype of Temnothorax (Dichothorax) pergandei	C. Emery	1895		"9.10"						Washington	Washington	District of Columbia	United States	40m	38.909	-77.037	9km	Nearctic	coordinates, elevation, and errors estimated from label data	20m
USNMENT00922523	ANTC43747	Myrmicinae	Temnothorax	pergandei		1w	pin	pergandei group		MMPC	USNM	paralectotype of Temnothorax (Dichothorax) pergandei	C. Emery	1895		"9.10"						Washington	Washington	District of Columbia	United States	40m	38.909	-77.037	9km	Nearctic	coordinates, elevation, and errors estimated from label data	20m
USNMENT00922525	ANTC43747	Myrmicinae	Temnothorax	pergandei		1w	pin	pergandei group		MMPC	USNM	paralectotype of Temnothorax (Dichothorax) pergandei	C. Emery	1895		"9.10"						Washington	Washington	District of Columbia	United States	40m	38.909	-77.037	9km	Nearctic	coordinates, elevation, and errors estimated from label data	20m
USNMENT00532783	ANTC43747	Myrmicinae	Temnothorax	pergandei		1w	pin	pergandei group		MMPC	USNM	paralectotype of Temnothorax (Dichothorax) pergandei	C. Emery	1895		"9.10"						Washington	Washington	District of Columbia	United States	40m	38.909	-77.037	9km	Nearctic	coordinates, elevation, and errors estimated from label data	20m
CASENT0904767	ANTC25267	Myrmicinae	Temnothorax	pergandei		1w	pin	pergandei group		MSNG	MSNG	paralectotype of Temnothorax (Dichothorax) pergandei	C. Emery	1895		"9.10"						Washington	Washington	District of Columbia	United States	40m	38.909	-77.037	9km	Nearctic	coordinates, elevation, and errors estimated from label data	20m
USNMENT00921850	ANTC43748	Myrmicinae	Temnothorax	pergandei		2w	pin	pergandei group		MMPC	USNM	lectotype of Leptothorax (Dichothorax) pergandei flavus	W.S. Creighton	1950	M.R. Smith							Adaton	Oktibbeha	Mississippi	United States	80m	33.4773	-88.9214	1km	Nearctic	coordinates, elevation, and errors estimated from label data	10m
USNMENT00529209	ANTC43748	Myrmicinae	Temnothorax	pergandei		1g	pin	pergandei group		MMPC	USNM	paralectotypes of Leptothorax (Dichothorax) pergandei flavus	W.S. Creighton	1950	M.R. Smith							Adaton	Oktibbeha	Mississippi	United States	80m	33.4773	-88.9214	1km	Nearctic	coordinates, elevation, and errors estimated from label data	10m
USNMENT00529210	ANTC43748	Myrmicinae	Temnothorax	pergandei		3w	pin	pergandei group		MMPC	USNM	paralectotypes of Leptothorax (Dichothorax) pergandei flavus	W.S. Creighton	1950	M.R. Smith							Adaton	Oktibbeha	Mississippi	United States	80m	33.4773	-88.9214	1km	Nearctic	coordinates, elevation, and errors estimated from label data	10m
USNMENT00921849	ANTC43748	Myrmicinae	Temnothorax	pergandei		3w	pin	pergandei group		MMPC	USNM	paralectotypes of Leptothorax (Dichothorax) pergandei flavus	W.S. Creighton	1950	M.R. Smith							Adaton	Oktibbeha	Mississippi	United States	80m	33.4773	-88.9214	1km	Nearctic	coordinates, elevation, and errors estimated from label data	10m
USNMENT00921851	ANTC43748	Myrmicinae	Temnothorax	pergandei		3w	pin	pergandei group		MMPC	USNM	paralectotypes of Leptothorax (Dichothorax) pergandei flavus	W.S. Creighton	1950	M.R. Smith							Adaton	Oktibbeha	Mississippi	United States	80m	33.4773	-88.9214	1km	Nearctic	coordinates, elevation, and errors estimated from label data	10m
USNMENT00921852	ANTC43748	Myrmicinae	Temnothorax	pergandei		3w	pin	pergandei group		MMPC	USNM	paralectotypes of Leptothorax (Dichothorax) pergandei flavus	W.S. Creighton	1950	M.R. Smith							Adaton	Oktibbeha	Mississippi	United States	80m	33.4773	-88.9214	1km	Nearctic	coordinates, elevation, and errors estimated from label data	10m
USNMENT00532780	ANTC43749	Myrmicinae	Temnothorax	pergandei		1w	pin	pergandei group		MMPC	USNM	lectotype of Leptothorax (Dichothorax) floridanus	W.Mackay	1993	Pergande	1882-07-18						Ft. George	Escambia	Florida	United States	5m	30.4259	-81.4318	1.5km	Nearctic	coordinates, elevation, and errors estimated from label data	5m
USNMENT00921856	ANTC43749	Myrmicinae	Temnothorax	pergandei		1w	pin	pergandei group		MMPC	USNM	paralectotype of Leptothorax (Dichothorax) floridanus	W.Mackay	1993	Pergande	1882-07-18						Ft. George	Escambia	Florida	United States	5m	30.4259	-81.4318	1.5km	Nearctic	coordinates, elevation, and errors estimated from label data	5m
USNMENT00921857	ANTC43749	Myrmicinae	Temnothorax	pergandei		1w	pin	pergandei group		MMPC	USNM	paralectotype of Leptothorax (Dichothorax) floridanus	W.Mackay	1993	Pergande	1882-07-18						Ft. George	Escambia	Florida	United States	5m	30.4259	-81.4318	1.5km	Nearctic	coordinates, elevation, and errors estimated from label data	5m
CASENT0904768	ANTC25268	Myrmicinae	Temnothorax	pergandei		1w	pin	pergandei group		MSNG	MSNG	paralectotype of Leptothorax (Dichothorax) floridanus	W.Mackay	1993	Pergande	1882-07-18						Ft. George	Escambia	Florida	United States	5m	30.4259	-81.4318	1.5km	Nearctic	coordinates, elevation, and errors estimated from label data	5m
USNMENT00529639	USNM62913	Myrmicinae	Temnothorax	pergandei		1w, 1m, 1g	pin	pergandei group		USNM	USNM	lectotype of Temnothorax (Dichothorax) manni (top) paralectotype of Temnothorax (Dichothorax) manni (middle and bottom)	Wesson	1935	W.M. Wheeler					clayey, sunbaked, sparsely vegetated soil		Nashville	Davidson	Tennessee	United States	130m	36.1627	-86.7816	unknown	Nearctic	coordinates, elevation, and errors estimated from label data
CASENT0608344	05llaTna311	Myrmicinae	Temnothorax	pergandei		1w	pin	pergandei group	MMPDNA#P324	MMPC	JTLC		J. Longino	2009-02-20	P. Hernández	2005-07-11	2005-07-18	pitfall	xerophyl scrub			1.8km NE Tezontepec		Hidalgo	Mexico	1990m	20.2057	-99.2711	50m	Nearctic
CASENT0608345	05llaTna311	Myrmicinae	Temnothorax	pergandei		1w	pin	pergandei group		MMPC	JTLC		J. Longino	2009-02-20	P. Hernández	2005-07-11	2005-07-18	pitfall	xerophyl scrub			1.8km NE Tezontepec		Hidalgo	Mexico	1990m	20.2057	-99.2711	50m	Nearctic
MCZENT00583595	SPC4993	Myrmicinae	Temnothorax	pergandei		1m, 1w	pin	pergandei group		MMPC	MCZC		M.M. Prebus	2021-01-01	S.P. Cover	1997-09-11			overgrazed desert	bare hole in Hilaria patch	scattered Ephedra, Mesquite and Acacia. Fine sand w/clay	1/2 mi S jct. Rt. 533 on State Line Rd.	Cochise	Arizona	United States	1255m	31.8635	-109.049	100m	Nearctic	coordinates, elevation, and errors estimated from label data	5m
CASENT0758667	SPC6341	Myrmicinae	Temnothorax	pergandei		1w	pin	pergandei group	MMPDNA#P156	MMPC	UCDC		S.P. Cover	2021-01-01	S.P. Cover	2001-08-15		hand collecting	oak-juniper woodland	nest at base of grass clump	Large grassy gap in Juniper-Quercus grisea woodland to 20' tall on rocky S-facing slope. Cryptic nest at base of grass clump, weakly marked by 1" diam. fine gravel pile. Coarse sandy soil. Nest seems to be <4" deep. Mod. grassy veg.	Chiricahua Mtns. Cave Creek Canyon. 0.4 mi N of Southwestern Research Station	Cochise	Arizona	United States	1740	31.8888	-109.204		Nearctic
CASENT0731541	ANTC43740	Myrmicinae	Temnothorax	pergandei		1w, 1g	pin	pergandei group	MMPDNA#P784	MMPC	UCDC		M.M. Prebus	2017-07-09	S.L. Heydon			sweeping	desert	roadside		Sonoita	Santa Cruz	Arizona	United States	1490m	31.6783	-110.63	1000m	Nearctic		10m
CASENT0758293	ANTC43746	Myrmicinae	Temnothorax	pergandei		1g, 2w	pin	pergandei group		MMPC	USNM		M.M. Prebus	2021-01-01	D.E. Read	1932-10-18						Hotsprings	Garland	Arkansas	United States	200m	34.5039	-93.0552	5km	Nearctic	coordinates, elevation, and errors estimated from label data	20m
MCZENT00583597	SPC4663	Myrmicinae	Temnothorax	pergandei		2w, 1g	pin	pergandei group		MMPC	MCZC		M.M. Prebus	2021-01-01	S.P. Cover	1996-05-14			Quercus alba, Q. falcata, Ulmus alata, Shortleaf pine 60' tall on gentle slope	rotten branch on litter surface in shade		Ouachita Mtns. 1.5 mi NW Jct. Rt. 27N on Rt. 270 (in Mt. Ida)	Montgomery	Arkansas	United States	215m	34.5672	-93.6503	100m	Nearctic	coordinates, elevation, and errors estimated from label data	5m
MCZENT00583598	SPC4663	Myrmicinae	Temnothorax	pergandei		2w	pin	pergandei group	MMPDNA#P341	MMPC	MCZC		M.M. Prebus	2021-01-01	S.P. Cover	1996-05-14			Quercus alba, Q. falcata, Ulmus alata, Shortleaf pine 60' tall on gentle slope	rotten branch on litter surface in shade		Ouachita Mtns. 1.5 mi NW Jct. Rt. 27N on Rt. 270 (in Mt. Ida)	Montgomery	Arkansas	United States	215m	34.5672	-93.6503	100m	Nearctic	coordinates, elevation, and errors estimated from label data	5m
MCZENT00583599	SPC4390	Myrmicinae	Temnothorax	pergandei		1w, 1g	pin	pergandei group		MMPC	MCZC		M.M. Prebus	2021-01-01	S.P. Cover	1995-04-03			open longleaf pine-Turkey oak sandhill forest	rotten pine stub 2 in diam. in open, sparsely grassy area. Pure sand	to 50' tall forest	Citrus Wildlife Management Area. 5.3 mi W Jct. Rt. 41 on Rt. 44, 0.3 mi S Jct. Rt. 44 on sand rd.	Citrus	Florida	United States	40m	28.8528	-82.4193	100m	Nearctic	coordinates, elevation, and errors estimated from label data	5m
CASENT0758668	SPC8411	Myrmicinae	Temnothorax	pergandei		1w	pin	pergandei group	MMPDNA#P157	MMPC	UCDC		S.P. Cover	2021-01-01	S.P. Cover	2010-09-24		hand collecting	pine-oak forest	nest in rotten stick in leaf litter	Nest in small rotten stick buried in litter in shade of oak clump. Pure sand. Southern Ridge Sandhill: Dense Slash Pine, Sand Pine, Myrtle Oak, Sand Live Oak, Carya floridana. Pines to 50', oaks and hickories to 15' tall.	Southern Ridge Sandhill, Archbold Biological Station	Highlands	Florida	United States	60	27.1867	-81.352		Nearctic
CASENT0758666	SPC6168	Myrmicinae	Temnothorax	pergandei		1w	pin	pergandei group	MMPDNA#P155	MMPC	UCDC		S.P. Cover	2021-01-01	S.P. Cover	2001-03-01		hand collecting	oak-sand pine scrub	hollow stick buried in litter	Dense, unburned Oak-Sand Pine scrub 20-25' tall. [Quercus geminata, Q. myrtifolia, Lyonia ferruginea] Hollow stick buried in litter. 2" litter, light shade.	Indian River City, Titusville Well Field, 0.1 mi. S. Rt. 50.	Orange	Florida	United States	20	28.5533	-80.8148		Nearctic
CASENT0758669	SPC8557	Myrmicinae	Temnothorax	pergandei		1w	pin	pergandei group	MMPDNA#P158	MMPC	UCDC		S.P. Cover	2021-01-01	S.P. Cover	2013-06-12		hand collecting	pine-oak forest	in rotten pine branch	In rotten pine branch. Open, recently (<6 months ago) burned Longleaf Pine sandhill, pines to 40', with moderately dense resprouting Turkey Oak, Sand Post Oak, Bracken, Smilax, all less <3' tall. Pure sand.	0.2 mi S of the jct. of AFB 211 on AFB 214 at Indigo Pond, Elgin Airforce Base	Walton	Florida	United States	70	30.6965	-86.332		Nearctic
CASENT0758292	ANTC43745	Myrmicinae	Temnothorax	pergandei		1g, 2w	pin	pergandei group		MMPC	USNM		M.M. Prebus	2021-01-01	P. Decelles	1975-04-05						Athens	Clarke	Georgia	United States	225m	33.9519	-83.3576	8km	Nearctic	coordinates, elevation, and errors estimated from label data	50m
CASENT0758308	ANTC43741	Myrmicinae	Temnothorax	pergandei		3w	pin	pergandei group	MMPDNA#P785	MMPC	UCDC		M.M. Prebus	2017-07-09	R.E. Levy	1968-05-15						Giant City S.P.	Union	Illinois	United States	215m	37.6035	-89.185	2km	Nearctic	coordinates estimated from label data
CASENT0758291	ANTC43744	Myrmicinae	Temnothorax	pergandei		2m, 1w	pin	pergandei group		MMPC	USNM		M.M. Prebus	2021-01-01	W.F. Buren	1941-06-23						Elkader	Clayton	Iowa	United States	225m	42.8539	-91.4054	1.5km	Nearctic	coordinates, elevation, and errors estimated from label data	5m
CASENT0758229	ANTC43744	Myrmicinae	Temnothorax	pergandei		1m, 1g	pin	pergandei group	MMPDNA#P786	MMPC	USNM		M.M. Prebus	2021-01-01	W.F. Buren	1944-06-23						Elkader	Clayton	Iowa	United States	225m	42.8539	-91.4054	1.5km	Nearctic	coordinates, elevation, and errors estimated from label data	5m
MCZENT00583596	SPC4959	Myrmicinae	Temnothorax	pergandei		1w, 1g	pin	pergandei group	MMPDNA#P362	MMPC	MCZC		M.M. Prebus	2021-01-01	S.P. Cover	1996-05-19			black oak, white oak forest	in Quercus borealis acorn on litter surface in light shade	60'-70' tall forest	Ozark Mtns. 8.7 mi. S Jct. Rt. 76/86 on Rt. 112 at FSR 1037.	Barry	Missouri	United States	475m	36.5447	-93.8546	100m	Nearctic	coordinates, elevation, and errors estimated from label data	10m
CASENT0758313	ANTC43743	Myrmicinae	Temnothorax	pergandei		1w	pin	pergandei group	MMPDNA#P315	MMPC	UCDC		M.M. Prebus	2017-07-09	G.W. Forister	2010-09-09						16km N Rodeo	Hidalgo	New Mexico	United States	1234m	31.9774	-109.036		Nearctic
CASENT0758261	ANTC43042	Myrmicinae	Temnothorax	pergandei		1w	pin	pergandei group		MMPC	MMPC		B. Guenard	2011	B. Guenard	2011-10-09	2011-10-09	hand collecting				Morrow Mountain SP	Stanly	North Carolina	United States	150m	35.3717	-80.0967	unknown	Nearctic	coordinates estimated from label data
CASENT0732597	ANTC43042	Myrmicinae	Temnothorax	pergandei		1w	pin	pergandei group	MMPDNA#P036	MMPC	UCDC		B. Guenard	2011	B. Guenard	2011-10-09	2011-10-09	hand collecting				Morrow Mountain SP	Stanly	North Carolina	United States	150m	35.3717	-80.0967		Nearctic	coordinates estimated from label data
CASENT0758310	SBM_272	Myrmicinae	Temnothorax	pergandei		2w	pin	pergandei group		MMPC	UCDC		M.M. Prebus	2017-07-09	S.B. Menke	2008-06-02		pitfall trap		pitfall trap	pitfall trap P8	Park at turnoff on tanager	Wake	North Carolina	United States	125m	35.76	-78.6887	unknown	Nearctic	elevation estimated from coordinates
CASENT0915983	PSW3785-6	Myrmicinae	Temnothorax	pergandei		3w	pin	pergandei group		MMPC	UCDC		M.M. Prebus	2017-07-09	P.S. Ward	1979-07-27		baiting	pine-oak-juniper woodland	at honey bait in open vegetation		The Basin, Chisos Mtns.	Brewster	Texas	United States	1540m	29.275	-103.303	200m	Nearctic	coordinates estimated from label data
CASENT0758355	PSW3785-6	Myrmicinae	Temnothorax	pergandei		3w	pin	pergandei group		MMPC	UCDC		M.M. Prebus	2017-07-09	P.S. Ward	1979-07-27		baiting	pine-oak-juniper woodland	at honey bait in open vegetation		The Basin, Chisos Mtns.	Brewster	Texas	United States	1540m	29.275	-103.303	200m	Nearctic	coordinates estimated from label data
CASENT0758307	PSW3785-6	Myrmicinae	Temnothorax	pergandei		2w	pin	pergandei group	MMPDNA#P361	MMPC	UCDC		M.M. Prebus	2017-07-09	P.S. Ward	1979-07-27		baiting	pine-oak-juniper woodland	at honey bait in open vegetation		The Basin, Chisos Mtns.	Brewster	Texas	United States	1540m	29.275	-103.303	200m	Nearctic	coordinates estimated from label data
CASENT0758356	PSW7197-2	Myrmicinae	Temnothorax	pergandei		2w	pin	pergandei group		MMPC	UCDC		M.M. Prebus	2017-07-09	P.S. Ward	1984-12-15		hand collecting	coastal mesquite scrub	stray foragers		Laguna Atacosa N.W.R.	Cameron	Texas	United States	5m	26.2845	-97.3853	8km	Nearctic	coordinates estimated from label data
CASENT0758309	PSW7197-2	Myrmicinae	Temnothorax	pergandei		1w	pin	pergandei group	MMPDNA#P360, MMPDNA#P798	MMPC	UCDC		M.M. Prebus	2017-07-09	P.S. Ward	1984-12-15		hand collecting	coastal mesquite scrub	stray foragers		Laguna Atacosa N.W.R.	Cameron	Texas	United States	5m	26.2845	-97.3853	8km	Nearctic	coordinates estimated from label data
CASENT0758311	ANTC43742	Myrmicinae	Temnothorax	pergandei		1w	pin	pergandei group		MMPC	UCDC		M.M. Prebus	2017-07-09	L.A. Baptiste	1996-08-15		sweeping		sweeping vegetation		38km S Kent	Jeff Davis	Texas	United States	1810m	30.7417	-104.14	100m	Nearctic	coordinates, elevation, and errors estimated from label data	5m
CASENT0758312	ANTC43742	Myrmicinae	Temnothorax	pergandei		1w	pin	pergandei group	MMPDNA#P316	MMPC	UCDC		M.M. Prebus	2017-07-09	L.A. Baptiste	1996-08-15		sweeping		sweeping vegetation		38km S Kent	Jeff Davis	Texas	United States	1810m	30.7417	-104.14	100m	Nearctic	coordinates, elevation, and errors estimated from label data	5m
MCZENT00583600	SPC5709	Myrmicinae	Temnothorax	pergandei		1w, 1g	pin	pergandei group		MMPC	MCZC		M.M. Prebus	2021-01-01	S.P. Cover	1999-08-31			Juniper, Emory Oak woodland 25' tall on gentle W-facing slope, sandy loam	Found when excavating 5708. Grassy open slope		Patagonia Mtns. 0.4mi N Jct FSR 135 on FSR 49	Santa Cruz	Arizona	United States	1645m	31.4338	-110.721	100m	Nearctic	coordinates, elevation, and errors estimated from label data	10m
MCZENT00583601	SPC5709	Myrmicinae	Temnothorax	pergandei		2w	pin	pergandei group		MMPC	MCZC		M.M. Prebus	2021-01-01	S.P. Cover	1999-08-31			Juniper, Emory Oak woodland 25' tall on gentle W-facing slope, sandy loam	Found when excavating 5708. Grassy open slope		Patagonia Mtns. 0.4mi N Jct FSR 135 on FSR 49	Santa Cruz	Arizona	United States	1645m	31.4338	-110.721	100m	Nearctic	coordinates, elevation, and errors estimated from label data	10m
MCZENT00583602	SPC5709	Myrmicinae	Temnothorax	pergandei		2w	pin	pergandei group		MMPC	MCZC		M.M. Prebus	2021-01-01	S.P. Cover	1999-08-31			Juniper, Emory Oak woodland 25' tall on gentle W-facing slope, sandy loam	Found when excavating 5708. Grassy open slope		Patagonia Mtns. 0.4mi N Jct FSR 135 on FSR 49	Santa Cruz	Arizona	United States	1645m	31.4338	-110.721	100m	Nearctic	coordinates, elevation, and errors estimated from label data	10m
MCZENT00583603	SPC5704	Myrmicinae	Temnothorax	pergandei		1w, 1g	pin	pergandei group		MMPC	MCZC		M.M. Prebus	2021-01-01	S.P. Cover	1999-08-31			Juniper, Emory Oak woodland 25' tall on gentle W-facing slope, sandy loam	Found when digging 5705. At edge of grassy gap in sun		Patagonia Mtns. 0.4mi N Jct FSR 135 on FSR 50	Santa Cruz	Arizona	United States	1645m	31.4338	-110.721	100m	Nearctic	coordinates, elevation, and errors estimated from label data	10m
MCZENT00583604	SPC5704	Myrmicinae	Temnothorax	pergandei		2w	pin	pergandei group		MMPC	MCZC		M.M. Prebus	2021-01-01	S.P. Cover	1999-08-31			Juniper, Emory Oak woodland 25' tall on gentle W-facing slope, sandy loam	Found when digging 5705. At edge of grassy gap in sun		Patagonia Mtns. 0.4mi N Jct FSR 135 on FSR 51	Santa Cruz	Arizona	United States	1645m	31.4338	-110.721	100m	Nearctic	coordinates, elevation, and errors estimated from label data	10m
MCZENT00583605	SPC5704	Myrmicinae	Temnothorax	pergandei		2w	pin	pergandei group	MMPDNA#P318	MMPC	MCZC		M.M. Prebus	2021-01-01	S.P. Cover	1999-08-31			Juniper, Emory Oak woodland 25' tall on gentle W-facing slope, sandy loam	Found when digging 5705. At edge of grassy gap in sun		Patagonia Mtns. 0.4mi N Jct FSR 135 on FSR 52	Santa Cruz	Arizona	United States	1645m	31.4338	-110.721	100m	Nearctic	coordinates, elevation, and errors estimated from label data	10m
CASENT0869114	RAJ2539	Myrmicinae	Temnothorax	pergandei		3w	pin	pergandei group		RAJC	RAJC		R.A. Johnson	2021-01-01	R.A. Johnson	2001-8-4			juniper grassland	small tumulus nest		Chiricahua Mtns, Paradise cemetery	Cochise	Arizona	United States	1682m	31.9317	-109.208		Nearctic
CASENT0869115	RAJ2539	Myrmicinae	Temnothorax	pergandei		4w	pin	pergandei group		RAJC	RAJC		R.A. Johnson	2021-01-01	R.A. Johnson	2001-8-4			juniper grassland	small tumulus nest		Chiricahua Mtns, Paradise cemetery	Cochise	Arizona	United States	1682m	31.9317	-109.208		Nearctic
CASENT0869113	RAJ2913	Myrmicinae	Temnothorax	pergandei		4w	pin	pergandei group		RAJC	RAJC		R.A. Johnson	2021-01-01	R.A. Johnson	2002-8-12			oak-juniper-mesquite woodland	stray foragers		Chiricahua Mtns, Tex Canyon	Cochise	Arizona	United States	1625m	31.6817	-109.32		Nearctic
CASENT0869116	RAJ3598	Myrmicinae	Temnothorax	pergandei		2w	pin	pergandei group		RAJC	RAJC		R.A. Johnson	2021-01-01	R.A. Johnson	2005-9-30			Oak-pinyon-juniper-grassland	in soil of excavated Trachymyrmex nest		1 mi S American Peak	Santa Cruz	Arizona	United States	1646m	31.4333	-110.722		Nearctic
CASENT0869110	SPC5704	Myrmicinae	Temnothorax	pergandei		2w	pin	pergandei group		RAJC	RAJC		S.P. Cover	2021-01-01	S.P. Cover	1999-8-25			scattered oak woodland	2” tumulus nest in grassland		1 mi S American Peak	Santa Cruz	Arizona	United States	1655m	31.4333	-110.72		Nearctic
CASENT0869111	SPC5704	Myrmicinae	Temnothorax	pergandei		3w	pin	pergandei group		RAJC	RAJC		S.P. Cover	2021-01-01	S.P. Cover	1999-8-25			scattered oak woodland	2” tumulus nest in grassland		1 mi S American Peak	Santa Cruz	Arizona	United States	1655m	31.4333	-110.72		Nearctic
CASENT0869112	SPC5704	Myrmicinae	Temnothorax	pergandei		3w	pin	pergandei group		RAJC	RAJC		S.P. Cover	2021-01-01	S.P. Cover	1999-8-25			scattered oak woodland	2” tumulus nest in grassland		1 mi S American Peak	Santa Cruz	Arizona	United States	1655m	31.4333	-110.72		Nearctic
TESC00009756	BEB000439	Myrmicinae	Temnothorax	pergandei		1w	pin	pergandei group	MMPDNA#P523	MMPC	BEBC		B.E. Boudinot	2021-01-01	B.E. Boudinot	2011-06-19		search	suburban	lawn and fields		Hendersonville	Davidson	Tennessee	United States	175m	36.3359	-86.568	30m	Nearctic
MEM 243844	ANTC46124	Myrmicinae	Temnothorax	pergandei		1w	pin	pergandei group	MMPDNA#P829	MMPC	MEM		MacGown, J.A.	2021-01-01	MacGown, J.A., Lewis, J.G.	2014-06-02			upland hardwood forest			Cane Creek Canyon Nature Preserve	Colbert	Alabama	United States	245m	34.6233	-87.8028		Nearctic	elevation estimated from coordinates
CASENT0867001	ANTC45761	Myrmicinae	Temnothorax	pergandei		3w	pin	pergandei group		MMPC	FSCA		M.M. Prebus	2018-10-31	W.S. Creighton	1924-06-11						Citronelle	Mobile	Alabama	United States	95m	31.0905	-88.228		Nearctic	coordinates and elevation estimated from label data
MEM 244952	ANTC46125	Myrmicinae	Temnothorax	pergandei		1w	pin	pergandei group	MMPDNA#P830	MMPC	MEM		Lewis, J.G., MacGown, J.A.	2019	Hill, J.G.	2017-06-23			in glade mixed hardwood/pine forest			Ouachita Mountains Biological Station	Polk	Arkansas	United States	475m	34.4581	-93.9989		Nearctic	elevation estimated from coordinates
CASENT0867165	ANTC45813	Myrmicinae	Temnothorax	pergandei		1m	pin	pergandei group		MMPC	FSCA		M.M. Prebus	2018-10-31	F.W. Mead	1974-05-01		blacklight trap		blacklight trap		Doyle Conner Bldg., Gainesville	Alachua	Florida	United States	30m	29.635	-82.3715		Nearctic	coordinates and elevation estimated from label data
CASENT0867167	ANTC45815	Myrmicinae	Temnothorax	pergandei		1m	pin	pergandei group		MMPC	FSCA		M.M. Prebus	2018-10-31	F.W. Mead	1971-04-22		blacklight trap		blacklight trap		Gainesville	Alachua	Florida	United States	30m	29.6516	-82.3248		Nearctic	coordinates and elevation estimated from label data
CASENT0867164	ANTC45812	Myrmicinae	Temnothorax	pergandei		3m	pin	pergandei group		MMPC	FSCA		M.M. Prebus	2018-10-31	J.R. Wiley	1976-10-28		blacklight trap		blacklight trap		Osceola National Forest	Columbia	Florida	United States	50m	30.202	-82.4586		Nearctic	coordinates and elevation estimated from label data
CASENT0867166	ANTC45814	Myrmicinae	Temnothorax	pergandei		1m	pin	pergandei group		MMPC	FSCA		M.M. Prebus	2018-10-31	C. Ross	1976-12-12		blacklight trap		blacklight trap		Osceola National Forest	Columbia	Florida	United States	50m	30.202	-82.4586		Nearctic	coordinates and elevation estimated from label data
CASENT0867162	ANTC45810	Myrmicinae	Temnothorax	pergandei		2m	pin	pergandei group		MMPC	FSCA		M.M. Prebus	2018-10-31	L.A. Stange	1978-08-30		blacklight trap		blacklight trap		Torreya State Park	Liberty	Florida	United States	55m	30.5665	-84.9478		Nearctic	coordinates and elevation estimated from label data
CASENT0759991	ANTC45758	Myrmicinae	Temnothorax	pergandei		3w	pin	pergandei group		MMPC	FSCA		M.M. Prebus	2018-10-31	H.A. Denmark	1959-10-14				Pinus clausa		11 mi E of Okla. R., Ocala National Forest	Marion	Florida	United States	45m	29.1668	-81.7916		Nearctic	coordinates and elevation estimated from label data
CASENT0759992	ANTC45758	Myrmicinae	Temnothorax	pergandei		3w	pin	pergandei group		MMPC	FSCA		M.M. Prebus	2018-10-31	H.A. Denmark	1959-10-14				Pinus clausa		11 mi E of Okla. R., Ocala National Forest	Marion	Florida	United States	45m	29.1668	-81.7916		Nearctic	coordinates and elevation estimated from label data
CASENT0759993	ANTC45758	Myrmicinae	Temnothorax	pergandei		3w	pin	pergandei group		MMPC	FSCA		M.M. Prebus	2018-10-31	H.A. Denmark	1959-10-14				Pinus clausa		11 mi E of Okla. R., Ocala National Forest	Marion	Florida	United States	45m	29.1668	-81.7916		Nearctic	coordinates and elevation estimated from label data
CASENT0759994	ANTC45758	Myrmicinae	Temnothorax	pergandei		3w	pin	pergandei group		MMPC	FSCA		M.M. Prebus	2018-10-31	H.A. Denmark	1959-10-14				Pinus clausa		11 mi E of Okla. R., Ocala National Forest	Marion	Florida	United States	45m	29.1668	-81.7916		Nearctic	coordinates and elevation estimated from label data
CASENT0759995	ANTC45758	Myrmicinae	Temnothorax	pergandei		1g, 2w	pin	pergandei group		MMPC	FSCA		M.M. Prebus	2018-10-31	H.A. Denmark	1959-10-14				Pinus clausa		11 mi E of Okla. R., Ocala National Forest	Marion	Florida	United States	45m	29.1668	-81.7916		Nearctic	coordinates and elevation estimated from label data
CASENT0759996	ANTC45759	Myrmicinae	Temnothorax	pergandei		1w	pin	pergandei group		MMPC	FSCA		M.M. Prebus	2018-10-31	H.A. Denmark	1960-06-27				Pinus clausa		Juniper Springs, Ocala National Forest	Marion	Florida	United States	5m	29.1839	-81.712		Nearctic	coordinates and elevation estimated from label data
CASENT0867011	ANTC45765	Myrmicinae	Temnothorax	pergandei		1w	pin	pergandei group		MMPC	FSCA		M.M. Prebus	2018-10-31	H.A. Denmark	1960-06-28				Pinus clausa	#2a	Juniper Springs, Ocala National Forest	Marion	Florida	United States	5m	29.1839	-81.712		Nearctic	coordinates and elevation estimated from label data
CASENT0867004	ANTC45763	Myrmicinae	Temnothorax	pergandei		1w	pin	pergandei group		MMPC	FSCA		M.M. Prebus	2018-10-31	H.A. Denmark	1960-11-26				Pinus clausa		Juniper Springs, Ocala National Forest	Marion	Florida	United States	5m	29.1839	-81.712		Nearctic	coordinates and elevation estimated from label data
CASENT0867005	ANTC45763	Myrmicinae	Temnothorax	pergandei		1w	pin	pergandei group		MMPC	FSCA		M.M. Prebus	2018-10-31	H.A. Denmark	1960-11-26				Pinus clausa		Juniper Springs, Ocala National Forest	Marion	Florida	United States	5m	29.1839	-81.712		Nearctic	coordinates and elevation estimated from label data
CASENT0867006	ANTC45763	Myrmicinae	Temnothorax	pergandei		1w	pin	pergandei group		MMPC	FSCA		M.M. Prebus	2018-10-31	H.A. Denmark	1960-11-26				Pinus clausa		Juniper Springs, Ocala National Forest	Marion	Florida	United States	5m	29.1839	-81.712		Nearctic	coordinates and elevation estimated from label data
CASENT0867007	ANTC45764	Myrmicinae	Temnothorax	pergandei		1w	pin	pergandei group		MMPC	FSCA		M.M. Prebus	2018-10-31	H.A. Denmark	1960-11-28				Pinus clausa	#2a	Juniper Springs, Ocala National Forest	Marion	Florida	United States	5m	29.1839	-81.712		Nearctic	coordinates and elevation estimated from label data
CASENT0867008	ANTC45765	Myrmicinae	Temnothorax	pergandei		1w	pin	pergandei group		MMPC	FSCA		M.M. Prebus	2018-10-31	H.A. Denmark	1959-12-21				Pinus clausa	#2b	Juniper Springs, Ocala National Forest	Marion	Florida	United States	5m	29.1839	-81.712		Nearctic	coordinates and elevation estimated from label data
CASENT0867009	ANTC45765	Myrmicinae	Temnothorax	pergandei		1w	pin	pergandei group		MMPC	FSCA		M.M. Prebus	2018-10-31	H.A. Denmark	1959-12-21				Pinus clausa	#2b	Juniper Springs, Ocala National Forest	Marion	Florida	United States	5m	29.1839	-81.712		Nearctic	coordinates and elevation estimated from label data
CASENT0867016	ANTC46032	Myrmicinae	Temnothorax	pergandei		1w	pin	pergandei group		MMPC	FSCA		M.M. Prebus	2018-10-31	H.A. Denmark	1959-12-21				Pinus clausa	#2b	Juniper Springs, Ocala National Forest	Marion	Florida	United States	5m	29.1839	-81.712		Nearctic	coordinates and elevation estimated from label data
CASENT0867017	ANTC46032	Myrmicinae	Temnothorax	pergandei		1w	pin	pergandei group		MMPC	FSCA		M.M. Prebus	2018-10-31	H.A. Denmark	1959-12-21				Pinus clausa	#2b	Juniper Springs, Ocala National Forest	Marion	Florida	United States	5m	29.1839	-81.712		Nearctic	coordinates and elevation estimated from label data
CASENT0867010	ANTC45765	Myrmicinae	Temnothorax	pergandei		1w	pin	pergandei group		MMPC	FSCA		M.M. Prebus	2018-10-31	H.A. Denmark	1960-05-20				Pinus clausa	#2b	Juniper Springs, Ocala National Forest	Marion	Florida	United States	5m	29.1839	-81.712		Nearctic	coordinates and elevation estimated from label data
CASENT0867012	ANTC45765	Myrmicinae	Temnothorax	pergandei		3w	pin	pergandei group		MMPC	FSCA		M.M. Prebus	2018-10-31	H.A. Denmark	1960-05-20				Pinus clausa	#2b	Juniper Springs, Ocala National Forest	Marion	Florida	United States	5m	29.1839	-81.712		Nearctic	coordinates and elevation estimated from label data
CASENT0867013	ANTC45765	Myrmicinae	Temnothorax	pergandei		1w	pin	pergandei group		MMPC	FSCA		M.M. Prebus	2018-10-31	H.A. Denmark	1960-05-20				Pinus clausa	#2b	Juniper Springs, Ocala National Forest	Marion	Florida	United States	5m	29.1839	-81.712		Nearctic	coordinates and elevation estimated from label data
CASENT0867014	ANTC45765	Myrmicinae	Temnothorax	pergandei		1w	pin	pergandei group		MMPC	FSCA		M.M. Prebus	2018-10-31	H.A. Denmark	1960-05-20				Pinus clausa	#2b	Juniper Springs, Ocala National Forest	Marion	Florida	United States	5m	29.1839	-81.712		Nearctic	coordinates and elevation estimated from label data
CASENT0867015	ANTC45765	Myrmicinae	Temnothorax	pergandei		1w	pin	pergandei group		MMPC	FSCA		M.M. Prebus	2018-10-31	H.A. Denmark	1960-05-20				Pinus clausa	#2b	Juniper Springs, Ocala National Forest	Marion	Florida	United States	5m	29.1839	-81.712		Nearctic	coordinates and elevation estimated from label data
CASENT0867002	ANTC45762	Myrmicinae	Temnothorax	pergandei		1w	pin	pergandei group		MMPC	FSCA		M.M. Prebus	2018-10-31	H.V. Weems	1958-04-04						Cape Sable	Monroe	Florida	United States	5m	25.2729	-81.1215		Nearctic	coordinates and elevation estimated from label data
CASENT0759999	CSM1380b	Myrmicinae	Temnothorax	pergandei		1w	pin	pergandei group		MMPC	FSCA		M.M. Prebus	2018-10-31	C.S. Moreau	2010-03-13						Little Torch Key, Torchwood Hammock, end of Pirates Rd.	Monroe	Florida	United States	12m	24.6544	-81.3878		Nearctic
CASENT0867163	ANTC45811	Myrmicinae	Temnothorax	pergandei		1m	pin	pergandei group		MMPC	FSCA		M.M. Prebus	2018-10-31	L.A. Stange	1979-09-01	1979-09-03	blacklight trap		blacklight trap		4.5 mi NW Holt, A & M Res. Sta., Blackwater River State Forest	Okaloosa	Florida	United States	20m	30.7358	-86.8163		Nearctic	coordinates and elevation estimated from label data
CASENT0867161	ANTC45809	Myrmicinae	Temnothorax	pergandei		2m	pin	pergandei group		MMPC	FSCA		M.M. Prebus	2018-10-31	L.A. Stange	1979-08-08	1979-08-11	blacklight trap		blacklight trap		Fam Biol. Sta., 3 mi NW Holt	Okaloosa	Florida	United States	20m	30.7314	-86.8014		Nearctic	coordinates and elevation estimated from label data
CASENT0867107	ANTC45788	Myrmicinae	Temnothorax	pergandei		1g, 2w	pin	pergandei group		MMPC	FSCA		M.M. Prebus	2018-10-31	Z. Prusak	1993-11-20				sandhill		Wekiwa Springs State Park	Orange	Florida	United States	20m	28.7107	-81.4608		Nearctic	coordinates and elevation estimated from label data
CASENT0867043	ANTC45770	Myrmicinae	Temnothorax	pergandei		2w	pin	pergandei group		MMPC	FSCA		M.M. Prebus	2018-10-31	R.E. Woodruff	1959-02-01				in malt trap		7.4 mi S of Narcoossee	Osceola	Florida	United States	25m	28.2087	-81.1721		Nearctic	coordinates and elevation estimated from label data
CASENT0867018	ANTC45766	Myrmicinae	Temnothorax	pergandei		3w	pin	pergandei group		MMPC	FSCA		M.M. Prebus	2018-10-31	A. Van Pelt	1948-08-09				P. palustris - Q. cinerea			Putnam	Florida	United States	20m	29.6265	-81.7787		Nearctic	coordinates and elevation estimated from label data
CASENT0867019	ANTC45767	Myrmicinae	Temnothorax	pergandei		3w	pin	pergandei group		MMPC	FSCA		M.M. Prebus	2018-10-31	A. Van Pelt	1948-09-04				hydric hammock			Putnam	Florida	United States	20m	29.6265	-81.7787		Nearctic	coordinates and elevation estimated from label data
CASENT0867020	ANTC45767	Myrmicinae	Temnothorax	pergandei		3w	pin	pergandei group		MMPC	FSCA		M.M. Prebus	2018-10-31	A. Van Pelt	1948-09-04				hydric hammock			Putnam	Florida	United States	20m	29.6265	-81.7787		Nearctic	coordinates and elevation estimated from label data
CASENT0867021	ANTC45767	Myrmicinae	Temnothorax	pergandei		3w	pin	pergandei group		MMPC	FSCA		M.M. Prebus	2018-10-31	A. Van Pelt	1948-09-04				hydric hammock			Putnam	Florida	United States	20m	29.6265	-81.7787		Nearctic	coordinates and elevation estimated from label data
CASENT0867022	ANTC45767	Myrmicinae	Temnothorax	pergandei		3w	pin	pergandei group		MMPC	FSCA		M.M. Prebus	2018-10-31	A. Van Pelt	1948-09-04				hydric hammock			Putnam	Florida	United States	20m	29.6265	-81.7787		Nearctic	coordinates and elevation estimated from label data
CASENT0867023	ANTC45767	Myrmicinae	Temnothorax	pergandei		3w	pin	pergandei group		MMPC	FSCA		M.M. Prebus	2018-10-31	A. Van Pelt	1948-09-04				hydric hammock			Putnam	Florida	United States	20m	29.6265	-81.7787		Nearctic	coordinates and elevation estimated from label data
CASENT0867024	ANTC45767	Myrmicinae	Temnothorax	pergandei		3w	pin	pergandei group		MMPC	FSCA		M.M. Prebus	2018-10-31	A. Van Pelt	1948-09-04				hydric hammock			Putnam	Florida	United States	20m	29.6265	-81.7787		Nearctic	coordinates and elevation estimated from label data
CASENT0867025	ANTC45767	Myrmicinae	Temnothorax	pergandei		3w	pin	pergandei group		MMPC	FSCA		M.M. Prebus	2018-10-31	A. Van Pelt	1948-09-04				hydric hammock			Putnam	Florida	United States	20m	29.6265	-81.7787		Nearctic	coordinates and elevation estimated from label data
CASENT0867026	ANTC45767	Myrmicinae	Temnothorax	pergandei		3w	pin	pergandei group		MMPC	FSCA		M.M. Prebus	2018-10-31	A. Van Pelt	1948-09-04				hydric hammock			Putnam	Florida	United States	20m	29.6265	-81.7787		Nearctic	coordinates and elevation estimated from label data
CASENT0867027	ANTC45767	Myrmicinae	Temnothorax	pergandei		3w	pin	pergandei group		MMPC	FSCA		M.M. Prebus	2018-10-31	A. Van Pelt	1948-09-04				hydric hammock			Putnam	Florida	United States	20m	29.6265	-81.7787		Nearctic	coordinates and elevation estimated from label data
CASENT0867028	ANTC45767	Myrmicinae	Temnothorax	pergandei		3w	pin	pergandei group		MMPC	FSCA		M.M. Prebus	2018-10-31	A. Van Pelt	1948-09-04				hydric hammock			Putnam	Florida	United States	20m	29.6265	-81.7787		Nearctic	coordinates and elevation estimated from label data
CASENT0867029	ANTC45767	Myrmicinae	Temnothorax	pergandei		3w	pin	pergandei group		MMPC	FSCA		M.M. Prebus	2018-10-31	A. Van Pelt	1948-09-04				hydric hammock			Putnam	Florida	United States	20m	29.6265	-81.7787		Nearctic	coordinates and elevation estimated from label data
CASENT0867030	ANTC45767	Myrmicinae	Temnothorax	pergandei		3w	pin	pergandei group		MMPC	FSCA		M.M. Prebus	2018-10-31	A. Van Pelt	1948-09-04				hydric hammock			Putnam	Florida	United States	20m	29.6265	-81.7787		Nearctic	coordinates and elevation estimated from label data
CASENT0867031	ANTC45767	Myrmicinae	Temnothorax	pergandei		3w	pin	pergandei group		MMPC	FSCA		M.M. Prebus	2018-10-31	A. Van Pelt	1948-09-04				hydric hammock			Putnam	Florida	United States	20m	29.6265	-81.7787		Nearctic	coordinates and elevation estimated from label data
CASENT0867032	ANTC45767	Myrmicinae	Temnothorax	pergandei		3w	pin	pergandei group		MMPC	FSCA		M.M. Prebus	2018-10-31	A. Van Pelt	1948-09-04				hydric hammock			Putnam	Florida	United States	20m	29.6265	-81.7787		Nearctic	coordinates and elevation estimated from label data
CASENT0867033	ANTC45767	Myrmicinae	Temnothorax	pergandei		3w	pin	pergandei group		MMPC	FSCA		M.M. Prebus	2018-10-31	A. Van Pelt	1948-09-04				hydric hammock			Putnam	Florida	United States	20m	29.6265	-81.7787		Nearctic	coordinates and elevation estimated from label data
CASENT0867034	ANTC45767	Myrmicinae	Temnothorax	pergandei		3w	pin	pergandei group		MMPC	FSCA		M.M. Prebus	2018-10-31	A. Van Pelt	1948-09-04				hydric hammock			Putnam	Florida	United States	20m	29.6265	-81.7787		Nearctic	coordinates and elevation estimated from label data
CASENT0867035	ANTC45767	Myrmicinae	Temnothorax	pergandei		3w	pin	pergandei group		MMPC	FSCA		M.M. Prebus	2018-10-31	A. Van Pelt	1948-09-04				hydric hammock			Putnam	Florida	United States	20m	29.6265	-81.7787		Nearctic	coordinates and elevation estimated from label data
CASENT0867036	ANTC45767	Myrmicinae	Temnothorax	pergandei		3w	pin	pergandei group		MMPC	FSCA		M.M. Prebus	2018-10-31	A. Van Pelt	1948-09-04				hydric hammock			Putnam	Florida	United States	20m	29.6265	-81.7787		Nearctic	coordinates and elevation estimated from label data
CASENT0867037	ANTC45767	Myrmicinae	Temnothorax	pergandei		3w	pin	pergandei group		MMPC	FSCA		M.M. Prebus	2018-10-31	A. Van Pelt	1948-09-04				hydric hammock			Putnam	Florida	United States	20m	29.6265	-81.7787		Nearctic	coordinates and elevation estimated from label data
CASENT0867038	ANTC45767	Myrmicinae	Temnothorax	pergandei		3w	pin	pergandei group		MMPC	FSCA		M.M. Prebus	2018-10-31	A. Van Pelt	1948-09-04				hydric hammock			Putnam	Florida	United States	20m	29.6265	-81.7787		Nearctic	coordinates and elevation estimated from label data
CASENT0867039	ANTC45767	Myrmicinae	Temnothorax	pergandei		3w	pin	pergandei group		MMPC	FSCA		M.M. Prebus	2018-10-31	A. Van Pelt	1948-09-04				hydric hammock			Putnam	Florida	United States	20m	29.6265	-81.7787		Nearctic	coordinates and elevation estimated from label data
CASENT0867040	ANTC45768	Myrmicinae	Temnothorax	pergandei		3w	pin	pergandei group		MMPC	FSCA		M.M. Prebus	2018-10-31	A. Van Pelt	1948-12-10				Turkey oak			Putnam	Florida	United States	20m	29.6265	-81.7787		Nearctic	coordinates and elevation estimated from label data
CASENT0867041	ANTC45768	Myrmicinae	Temnothorax	pergandei		3w	pin	pergandei group		MMPC	FSCA		M.M. Prebus	2018-10-31	A. Van Pelt	1948-12-10				Turkey oak			Putnam	Florida	United States	20m	29.6265	-81.7787		Nearctic	coordinates and elevation estimated from label data
CASENT0867042	ANTC45769	Myrmicinae	Temnothorax	pergandei		3w	pin	pergandei group		MMPC	FSCA		M.M. Prebus	2018-10-31	A. Van Pelt	1948-10-16				Q. spp., Leon			Putnam	Florida	United States	20m	29.6265	-81.7787		Nearctic	coordinates and elevation estimated from label data
CASENT0867044	ANTC45771	Myrmicinae	Temnothorax	pergandei		3w	pin	pergandei group		MMPC	FSCA		M.M. Prebus	2018-10-31	A. Van Pelt	1948-10-16				Q. spp., Leon			Putnam	Florida	United States	20m	29.6265	-81.7787		Nearctic	coordinates and elevation estimated from label data
CASENT0867045	ANTC45771	Myrmicinae	Temnothorax	pergandei		3w	pin	pergandei group		MMPC	FSCA		M.M. Prebus	2018-10-31	A. Van Pelt	1948-10-16				Q. spp., Leon			Putnam	Florida	United States	20m	29.6265	-81.7787		Nearctic	coordinates and elevation estimated from label data
CASENT0867046	ANTC45771	Myrmicinae	Temnothorax	pergandei		3w	pin	pergandei group		MMPC	FSCA		M.M. Prebus	2018-10-31	A. Van Pelt	1948-10-16				Q. spp., Leon			Putnam	Florida	United States	20m	29.6265	-81.7787		Nearctic	coordinates and elevation estimated from label data
CASENT0867047	ANTC45771	Myrmicinae	Temnothorax	pergandei		1g, 2w	pin	pergandei group		MMPC	FSCA		M.M. Prebus	2018-10-31	A. Van Pelt	1948-10-16				Q. spp., Leon			Putnam	Florida	United States	20m	29.6265	-81.7787		Nearctic	coordinates and elevation estimated from label data
CASENT0867055	ANTC45773	Myrmicinae	Temnothorax	pergandei		3w	pin	pergandei group		MMPC	FSCA		M.M. Prebus	2018-10-31	A. Van Pelt	1948-10-16				Q. spp., Leon			Putnam	Florida	United States	20m	29.6265	-81.7787		Nearctic	coordinates and elevation estimated from label data
CASENT0867056	ANTC45773	Myrmicinae	Temnothorax	pergandei		3w	pin	pergandei group		MMPC	FSCA		M.M. Prebus	2018-10-31	A. Van Pelt	1948-10-16				Q. spp., Leon			Putnam	Florida	United States	20m	29.6265	-81.7787		Nearctic	coordinates and elevation estimated from label data
CASENT0867058	ANTC45775	Myrmicinae	Temnothorax	pergandei		3w	pin	pergandei group		MMPC	FSCA		M.M. Prebus	2018-10-31	A. Van Pelt	1948-08-03				Pong pine-Fetterbush			Putnam	Florida	United States	20m	29.6265	-81.7787		Nearctic	coordinates and elevation estimated from label data
CASENT0867062	ANTC45778	Myrmicinae	Temnothorax	pergandei		3w	pin	pergandei group		MMPC	FSCA		M.M. Prebus	2018-10-31	A. Van Pelt	1948-08-09				P. palustris - Q. cinerea			Putnam	Florida	United States	20m	29.6265	-81.7787		Nearctic	coordinates and elevation estimated from label data
CASENT0867063	ANTC45778	Myrmicinae	Temnothorax	pergandei		3w	pin	pergandei group		MMPC	FSCA		M.M. Prebus	2018-10-31	A. Van Pelt	1948-08-09				P. palustris - Q. cinerea			Putnam	Florida	United States	20m	29.6265	-81.7787		Nearctic	coordinates and elevation estimated from label data
CASENT0867064	ANTC45778	Myrmicinae	Temnothorax	pergandei		3w	pin	pergandei group		MMPC	FSCA		M.M. Prebus	2018-10-31	A. Van Pelt	1948-08-09				P. palustris - Q. cinerea			Putnam	Florida	United States	20m	29.6265	-81.7787		Nearctic	coordinates and elevation estimated from label data
CASENT0867065	ANTC45778	Myrmicinae	Temnothorax	pergandei		3w	pin	pergandei group		MMPC	FSCA		M.M. Prebus	2018-10-31	A. Van Pelt	1948-08-09				P. palustris - Q. cinerea			Putnam	Florida	United States	20m	29.6265	-81.7787		Nearctic	coordinates and elevation estimated from label data
CASENT0867066	ANTC45778	Myrmicinae	Temnothorax	pergandei		3w	pin	pergandei group		MMPC	FSCA		M.M. Prebus	2018-10-31	A. Van Pelt	1948-08-09				P. palustris - Q. cinerea			Putnam	Florida	United States	20m	29.6265	-81.7787		Nearctic	coordinates and elevation estimated from label data
CASENT0867067	ANTC45778	Myrmicinae	Temnothorax	pergandei		3w	pin	pergandei group		MMPC	FSCA		M.M. Prebus	2018-10-31	A. Van Pelt	1948-08-09				P. palustris - Q. cinerea			Putnam	Florida	United States	20m	29.6265	-81.7787		Nearctic	coordinates and elevation estimated from label data
CASENT0867068	ANTC45778	Myrmicinae	Temnothorax	pergandei		3w	pin	pergandei group		MMPC	FSCA		M.M. Prebus	2018-10-31	A. Van Pelt	1948-08-09				P. palustris - Q. cinerea			Putnam	Florida	United States	20m	29.6265	-81.7787		Nearctic	coordinates and elevation estimated from label data
CASENT0867069	ANTC45778	Myrmicinae	Temnothorax	pergandei		3w	pin	pergandei group		MMPC	FSCA		M.M. Prebus	2018-10-31	A. Van Pelt	1948-08-09				P. palustris - Q. cinerea			Putnam	Florida	United States	20m	29.6265	-81.7787		Nearctic	coordinates and elevation estimated from label data
CASENT0867070	ANTC45778	Myrmicinae	Temnothorax	pergandei		3w	pin	pergandei group		MMPC	FSCA		M.M. Prebus	2018-10-31	A. Van Pelt	1948-08-09				P. palustris - Q. cinerea			Putnam	Florida	United States	20m	29.6265	-81.7787		Nearctic	coordinates and elevation estimated from label data
CASENT0867071	ANTC45778	Myrmicinae	Temnothorax	pergandei		3w	pin	pergandei group		MMPC	FSCA		M.M. Prebus	2018-10-31	A. Van Pelt	1948-08-09				P. palustris - Q. cinerea			Putnam	Florida	United States	20m	29.6265	-81.7787		Nearctic	coordinates and elevation estimated from label data
CASENT0867072	ANTC45778	Myrmicinae	Temnothorax	pergandei		2w	pin	pergandei group		MMPC	FSCA		M.M. Prebus	2018-10-31	A. Van Pelt	1948-08-09				P. palustris - Q. cinerea			Putnam	Florida	United States	20m	29.6265	-81.7787		Nearctic	coordinates and elevation estimated from label data
CASENT0867073	ANTC45779	Myrmicinae	Temnothorax	pergandei		3w	pin	pergandei group		MMPC	FSCA		M.M. Prebus	2018-10-31	A. Van Pelt	1948-09-03				Quercus spp.			Putnam	Florida	United States	20m	29.6265	-81.7787		Nearctic	coordinates and elevation estimated from label data
CASENT0867080	ANTC45781	Myrmicinae	Temnothorax	pergandei		3w	pin	pergandei group		MMPC	FSCA		M.M. Prebus	2018-10-31	A. Van Pelt	1948-09-03				Quercus spp.			Putnam	Florida	United States	20m	29.6265	-81.7787		Nearctic	coordinates and elevation estimated from label data
CASENT0867082	ANTC45781	Myrmicinae	Temnothorax	pergandei		3w	pin	pergandei group		MMPC	FSCA		M.M. Prebus	2018-10-31	A. Van Pelt	1948-09-03				Quercus spp.			Putnam	Florida	United States	20m	29.6265	-81.7787		Nearctic	coordinates and elevation estimated from label data
CASENT0867083	ANTC45781	Myrmicinae	Temnothorax	pergandei		3w	pin	pergandei group		MMPC	FSCA		M.M. Prebus	2018-10-31	A. Van Pelt	1948-09-03				Quercus spp.			Putnam	Florida	United States	20m	29.6265	-81.7787		Nearctic	coordinates and elevation estimated from label data
CASENT0867084	ANTC45781	Myrmicinae	Temnothorax	pergandei		3w	pin	pergandei group		MMPC	FSCA		M.M. Prebus	2018-10-31	A. Van Pelt	1948-09-03				Quercus spp.			Putnam	Florida	United States	20m	29.6265	-81.7787		Nearctic	coordinates and elevation estimated from label data
CASENT0867085	ANTC45781	Myrmicinae	Temnothorax	pergandei		3w	pin	pergandei group		MMPC	FSCA		M.M. Prebus	2018-10-31	A. Van Pelt	1948-09-03				Quercus spp.			Putnam	Florida	United States	20m	29.6265	-81.7787		Nearctic	coordinates and elevation estimated from label data
CASENT0867074	ANTC45780	Myrmicinae	Temnothorax	pergandei		3w	pin	pergandei group		MMPC	FSCA		M.M. Prebus	2018-10-31	A. Van Pelt	1948-09-21				P. palustris - Q. cinerea			Putnam	Florida	United States	20m	29.6265	-81.7787		Nearctic	coordinates and elevation estimated from label data
CASENT0867075	ANTC45780	Myrmicinae	Temnothorax	pergandei		3w	pin	pergandei group		MMPC	FSCA		M.M. Prebus	2018-10-31	A. Van Pelt	1948-09-21				P. palustris - Q. cinerea			Putnam	Florida	United States	20m	29.6265	-81.7787		Nearctic	coordinates and elevation estimated from label data
CASENT0867076	ANTC45780	Myrmicinae	Temnothorax	pergandei		3w	pin	pergandei group		MMPC	FSCA		M.M. Prebus	2018-10-31	A. Van Pelt	1948-09-21				P. palustris - Q. cinerea			Putnam	Florida	United States	20m	29.6265	-81.7787		Nearctic	coordinates and elevation estimated from label data
CASENT0867077	ANTC45780	Myrmicinae	Temnothorax	pergandei		3w	pin	pergandei group		MMPC	FSCA		M.M. Prebus	2018-10-31	A. Van Pelt	1948-09-21				P. palustris - Q. cinerea			Putnam	Florida	United States	20m	29.6265	-81.7787		Nearctic	coordinates and elevation estimated from label data
CASENT0867078	ANTC45780	Myrmicinae	Temnothorax	pergandei		3w	pin	pergandei group		MMPC	FSCA		M.M. Prebus	2018-10-31	A. Van Pelt	1948-09-21				P. palustris - Q. cinerea			Putnam	Florida	United States	20m	29.6265	-81.7787		Nearctic	coordinates and elevation estimated from label data
CASENT0867079	ANTC45780	Myrmicinae	Temnothorax	pergandei		3w	pin	pergandei group		MMPC	FSCA		M.M. Prebus	2018-10-31	A. Van Pelt	1948-09-21				P. palustris - Q. cinerea			Putnam	Florida	United States	20m	29.6265	-81.7787		Nearctic	coordinates and elevation estimated from label data
CASENT0867081	ANTC45780	Myrmicinae	Temnothorax	pergandei		3w	pin	pergandei group		MMPC	FSCA		M.M. Prebus	2018-10-31	A. Van Pelt	1948-09-21				P. palustris - Q. cinerea			Putnam	Florida	United States	20m	29.6265	-81.7787		Nearctic	coordinates and elevation estimated from label data
CASENT0867096	ANTC45785	Myrmicinae	Temnothorax	pergandei		2w	pin	pergandei group		MMPC	FSCA		M.M. Prebus	2018-10-31	A. Van Pelt	1948-09-21				P. palustris - Q. cinerea			Putnam	Florida	United States	20m	29.6265	-81.7787		Nearctic	coordinates and elevation estimated from label data
CASENT0867097	ANTC45785	Myrmicinae	Temnothorax	pergandei		2w	pin	pergandei group		MMPC	FSCA		M.M. Prebus	2018-10-31	A. Van Pelt	1948-09-21				P. palustris - Q. cinerea			Putnam	Florida	United States	20m	29.6265	-81.7787		Nearctic	coordinates and elevation estimated from label data
CASENT0867087	ANTC45783	Myrmicinae	Temnothorax	pergandei		2w	pin	pergandei group		MMPC	FSCA		M.M. Prebus	2018-10-31	A. Van Pelt	1948-10-02				mesic hammock			Putnam	Florida	United States	20m	29.6265	-81.7787		Nearctic	coordinates and elevation estimated from label data
CASENT0867088	ANTC45783	Myrmicinae	Temnothorax	pergandei		3w	pin	pergandei group		MMPC	FSCA		M.M. Prebus	2018-10-31	A. Van Pelt	1948-10-02				mesic hammock			Putnam	Florida	United States	20m	29.6265	-81.7787		Nearctic	coordinates and elevation estimated from label data
CASENT0867089	ANTC45783	Myrmicinae	Temnothorax	pergandei		3w	pin	pergandei group		MMPC	FSCA		M.M. Prebus	2018-10-31	A. Van Pelt	1948-10-02				mesic hammock			Putnam	Florida	United States	20m	29.6265	-81.7787		Nearctic	coordinates and elevation estimated from label data
CASENT0867090	ANTC45783	Myrmicinae	Temnothorax	pergandei		3w	pin	pergandei group		MMPC	FSCA		M.M. Prebus	2018-10-31	A. Van Pelt	1948-10-02				mesic hammock			Putnam	Florida	United States	20m	29.6265	-81.7787		Nearctic	coordinates and elevation estimated from label data
CASENT0867091	ANTC45783	Myrmicinae	Temnothorax	pergandei		3w	pin	pergandei group		MMPC	FSCA		M.M. Prebus	2018-10-31	A. Van Pelt	1948-10-02				mesic hammock			Putnam	Florida	United States	20m	29.6265	-81.7787		Nearctic	coordinates and elevation estimated from label data
CASENT0867048	ANTC45772	Myrmicinae	Temnothorax	pergandei		2w	pin	pergandei group		MMPC	FSCA		M.M. Prebus	2018-10-31	A. Van Pelt	1948-10-11				P. palustris - Q. cinerea			Putnam	Florida	United States	20m	29.6265	-81.7787		Nearctic	coordinates and elevation estimated from label data
CASENT0867049	ANTC45772	Myrmicinae	Temnothorax	pergandei		3w	pin	pergandei group		MMPC	FSCA		M.M. Prebus	2018-10-31	A. Van Pelt	1948-10-11				P. palustris - Q. cinerea			Putnam	Florida	United States	20m	29.6265	-81.7787		Nearctic	coordinates and elevation estimated from label data
CASENT0867050	ANTC45772	Myrmicinae	Temnothorax	pergandei		3w	pin	pergandei group		MMPC	FSCA		M.M. Prebus	2018-10-31	A. Van Pelt	1948-10-11				P. palustris - Q. cinerea			Putnam	Florida	United States	20m	29.6265	-81.7787		Nearctic	coordinates and elevation estimated from label data
CASENT0867051	ANTC45772	Myrmicinae	Temnothorax	pergandei		3w	pin	pergandei group		MMPC	FSCA		M.M. Prebus	2018-10-31	A. Van Pelt	1948-10-11				P. palustris - Q. cinerea			Putnam	Florida	United States	20m	29.6265	-81.7787		Nearctic	coordinates and elevation estimated from label data
CASENT0867052	ANTC45772	Myrmicinae	Temnothorax	pergandei		3w	pin	pergandei group		MMPC	FSCA		M.M. Prebus	2018-10-31	A. Van Pelt	1948-10-11				P. palustris - Q. cinerea			Putnam	Florida	United States	20m	29.6265	-81.7787		Nearctic	coordinates and elevation estimated from label data
CASENT0867053	ANTC45772	Myrmicinae	Temnothorax	pergandei		3w	pin	pergandei group		MMPC	FSCA		M.M. Prebus	2018-10-31	A. Van Pelt	1948-10-11				P. palustris - Q. cinerea			Putnam	Florida	United States	20m	29.6265	-81.7787		Nearctic	coordinates and elevation estimated from label data
CASENT0867054	ANTC45772	Myrmicinae	Temnothorax	pergandei		2w	pin	pergandei group		MMPC	FSCA		M.M. Prebus	2018-10-31	A. Van Pelt	1948-10-11				P. palustris - Q. cinerea			Putnam	Florida	United States	20m	29.6265	-81.7787		Nearctic	coordinates and elevation estimated from label data
CASENT0867059	ANTC45776	Myrmicinae	Temnothorax	pergandei		2w	pin	pergandei group		MMPC	FSCA		M.M. Prebus	2018-10-31	A. Van Pelt	1948-10-28				P. palustris			Putnam	Florida	United States	20m	29.6265	-81.7787		Nearctic	coordinates and elevation estimated from label data
CASENT0867098	ANTC45786	Myrmicinae	Temnothorax	pergandei		3w	pin	pergandei group		MMPC	FSCA		M.M. Prebus	2018-10-31	A. Van Pelt	1948-11-14				mesic hammock			Putnam	Florida	United States	20m	29.6265	-81.7787		Nearctic	coordinates and elevation estimated from label data
CASENT0867099	ANTC45786	Myrmicinae	Temnothorax	pergandei		2w	pin	pergandei group		MMPC	FSCA		M.M. Prebus	2018-10-31	A. Van Pelt	1948-11-14				mesic hammock			Putnam	Florida	United States	20m	29.6265	-81.7787		Nearctic	coordinates and elevation estimated from label data
CASENT0867100	ANTC45786	Myrmicinae	Temnothorax	pergandei		2w	pin	pergandei group		MMPC	FSCA		M.M. Prebus	2018-10-31	A. Van Pelt	1948-11-14				mesic hammock			Putnam	Florida	United States	20m	29.6265	-81.7787		Nearctic	coordinates and elevation estimated from label data
CASENT0867101	ANTC45786	Myrmicinae	Temnothorax	pergandei		3w	pin	pergandei group		MMPC	FSCA		M.M. Prebus	2018-10-31	A. Van Pelt	1948-11-14				mesic hammock			Putnam	Florida	United States	20m	29.6265	-81.7787		Nearctic	coordinates and elevation estimated from label data
CASENT0867102	ANTC45786	Myrmicinae	Temnothorax	pergandei		3w	pin	pergandei group		MMPC	FSCA		M.M. Prebus	2018-10-31	A. Van Pelt	1948-11-14				mesic hammock			Putnam	Florida	United States	20m	29.6265	-81.7787		Nearctic	coordinates and elevation estimated from label data
CASENT0867060	ANTC45777	Myrmicinae	Temnothorax	pergandei		2w	pin	pergandei group		MMPC	FSCA		M.M. Prebus	2018-10-31	A. Van Pelt	1948-12-05				P. clausa - Q. spp.			Putnam	Florida	United States	20m	29.6265	-81.7787		Nearctic	coordinates and elevation estimated from label data
CASENT0867061	ANTC45777	Myrmicinae	Temnothorax	pergandei		3w	pin	pergandei group		MMPC	FSCA		M.M. Prebus	2018-10-31	A. Van Pelt	1948-12-05				P. clausa - Q. spp.			Putnam	Florida	United States	20m	29.6265	-81.7787		Nearctic	coordinates and elevation estimated from label data
CASENT0867057	ANTC45774	Myrmicinae	Temnothorax	pergandei		2w	pin	pergandei group		MMPC	FSCA		M.M. Prebus	2018-10-31	A. Van Pelt	1949-04-23				P. palustris - Q. cinerea			Putnam	Florida	United States	20m	29.6265	-81.7787		Nearctic	coordinates and elevation estimated from label data
CASENT0867092	ANTC45784	Myrmicinae	Temnothorax	pergandei		3w	pin	pergandei group		MMPC	FSCA		M.M. Prebus	2018-10-31	A. Van Pelt	1949-09-06				Q. cinerea			Putnam	Florida	United States	20m	29.6265	-81.7787		Nearctic	coordinates and elevation estimated from label data
CASENT0867093	ANTC45784	Myrmicinae	Temnothorax	pergandei		3w	pin	pergandei group		MMPC	FSCA		M.M. Prebus	2018-10-31	A. Van Pelt	1949-09-06				Q. cinerea			Putnam	Florida	United States	20m	29.6265	-81.7787		Nearctic	coordinates and elevation estimated from label data
CASENT0867094	ANTC45784	Myrmicinae	Temnothorax	pergandei		1g, 2w	pin	pergandei group		MMPC	FSCA		M.M. Prebus	2018-10-31	A. Van Pelt	1949-09-06				Q. cinerea			Putnam	Florida	United States	20m	29.6265	-81.7787		Nearctic	coordinates and elevation estimated from label data
CASENT0867095	ANTC45784	Myrmicinae	Temnothorax	pergandei		3w	pin	pergandei group		MMPC	FSCA		M.M. Prebus	2018-10-31	A. Van Pelt	1949-09-06				Q. cinerea			Putnam	Florida	United States	20m	29.6265	-81.7787		Nearctic	coordinates and elevation estimated from label data
CASENT0867086	ANTC45782	Myrmicinae	Temnothorax	pergandei		3w	pin	pergandei group		MMPC	FSCA		M.M. Prebus	2018-10-31	A. Van Pelt	1950-01-17				P. serotina - Desmoth			Putnam	Florida	United States	20m	29.6265	-81.7787		Nearctic	coordinates and elevation estimated from label data
CASENT0867103	ANTC45787	Myrmicinae	Temnothorax	pergandei		2w	pin	pergandei group		MMPC	FSCA		M.M. Prebus	2018-10-31	A. Van Pelt	1950-01-17				P. serotina - Desmoth			Putnam	Florida	United States	20m	29.6265	-81.7787		Nearctic	coordinates and elevation estimated from label data
CASENT0867104	ANTC45787	Myrmicinae	Temnothorax	pergandei		2w	pin	pergandei group		MMPC	FSCA		M.M. Prebus	2018-10-31	A. Van Pelt	1950-01-17				P. serotina - Desmoth			Putnam	Florida	United States	20m	29.6265	-81.7787		Nearctic	coordinates and elevation estimated from label data
CASENT0867105	ANTC45787	Myrmicinae	Temnothorax	pergandei		3w	pin	pergandei group		MMPC	FSCA		M.M. Prebus	2018-10-31	A. Van Pelt	1950-01-17				P. serotina - Desmoth			Putnam	Florida	United States	20m	29.6265	-81.7787		Nearctic	coordinates and elevation estimated from label data
CASENT0867106	JTL2604	Myrmicinae	Temnothorax	pergandei		2w	pin	pergandei group		MMPC	FSCA		M.M. Prebus	2018-10-31	J. Longino	1990-02-01						Myakka River State Park	Sarasota	Florida	United States	5m	27.2403	-82.3152		Nearctic	coordinates and elevation estimated from label data
CASENT0867003	PBK775	Myrmicinae	Temnothorax	pergandei		3w	pin	pergandei group		MMPC	FSCA		M.M. Prebus	2018-10-31	P.B. Kannowski	1953-06-13			pine-oak	on sand		21st District, Lot#172	Seminole	Florida	United States	35m	30.9613	-84.8575		Nearctic	coordinates and elevation estimated from label data
CASENT0759989	ANTC45758	Myrmicinae	Temnothorax	pergandei		1m	pin	pergandei group		MMPC	FSCA		W.P. Mackay	1980	H.V. Weems	1953-12-29				on Flaveria linearis		Saddlebunch Keys	Monroe	Florida	United States	5m	24.6051	-81.594		Nearctic
MEM 245145	ANTC46126	Myrmicinae	Temnothorax	pergandei		1w	pin	pergandei group	MMPDNA#P831	MMPC	MEM		Lewis, J.G., MacGown, J.A.	2019	Hill, J.G.	2016-06-05			hardwood forest	mountain trail		Tallulah Gorge State Park	Rabun	Georgia	United States	575m	34.7372	-83.3931		Nearctic
CASENT0758874	ANTC43849	Myrmicinae	Temnothorax	pergandei		1w	pin	pergandei group	MMPDNA#P363	MMPC	UGCA		D. Booher	1905-07-04	D. Booher	2012-03-30			hardwood forest	SW facing slope, ex Carya nut	H1-02a	Pinhoti trail, Mt. Sinai	Whitfield	Georgia	United States	485m	34.739	-85.0167	minute	Nearctic	elevation and errors estimated from label data
CASENT0759704	INHS439.048	Myrmicinae	Temnothorax	pergandei		1w	95% EtOH	pergandei group		MMPC	INHS		Prebus, M.M.	2018-09-18	Ross & Sanderson	1942-11-06				ground litter		Herod	Pope	Illinois	United States	135m	37.5803	-88.4362	minute	Nearctic	coordinates estimated from label data	10m
CASENT0867168	ANTC45805	Myrmicinae	Temnothorax	pergandei		1w	pin	pergandei group		MMPC	FSCA		M.M. Prebus	2018-10-31	Wm. Buren	1941-05-11						Boone	Boone	Iowa	United States	345m	42.0597	-93.8802		Nearctic	coordinates and elevation estimated from label data
MEM 245110	ANTC46127	Myrmicinae	Temnothorax	pergandei		1w	pin	pergandei group	MMPDNA#P832	MMPC	MEM		Lewis, J.G., MacGown, J.A.	2019	Daugherty, D.M.	2013-07-22		Lindgren funnel trap baited with IPS lure				Berea	Madison	Kentucky	United States	295m	37.6008	-84.2997		Nearctic	elevation estimated from coordinates
CASENT0867160	ANTC45796	Myrmicinae	Temnothorax	pergandei		3w	pin	pergandei group		MMPC	FSCA		M.M. Prebus	2018-10-31	Wm. Buren	1940-06-14						Glenwood	Mill	Iowa	United States	310m	41.0469	-95.7425		Nearctic	coordinates and elevation estimated from label data
MEM 243841	ANTC46128	Myrmicinae	Temnothorax	pergandei		1w	pin	pergandei group	MMPDNA#P833	MMPC	MEM		MacGown, J.A.	2021-01-01	Chen, X.	2016-06-16				on tallow root		Jean Lafitte National Historical Park and Preserve	Jefferson	Louisiana	United States	5m	29.7697	-90.13		Nearctic	elevation estimated from coordinates
CASENT0868956	ANTC46130	Myrmicinae	Temnothorax	pergandei		1g	pin	pergandei group		MMPC	MEM		M.M. Prebus	2021-01-01	MacGown, J.A.	2012-06-06			sloped hardwood forest	in Carya glabra nut		Tombigbee National Forest	Winston Co.	Mississippi	United States	210m	33.2156	-89.1042		Nearctic	elevation estimated from coordinates
CASENT0868957	ANTC46130	Myrmicinae	Temnothorax	pergandei		1m	pin	pergandei group		MMPC	MEM		M.M. Prebus	2021-01-01	MacGown, J.A.	2012-06-06			sloped hardwood forest	in Carya glabra nut		Tombigbee National Forest	Winston Co.	Mississippi	United States	210m	33.2156	-89.1042		Nearctic	elevation estimated from coordinates
CASENT0868958	ANTC46130	Myrmicinae	Temnothorax	pergandei		1w	pin	pergandei group		MMPC	MEM		M.M. Prebus	2021-01-01	MacGown, J.A.	2012-06-06			sloped hardwood forest	in Carya glabra nut		Tombigbee National Forest	Winston Co.	Mississippi	United States	210m	33.2156	-89.1042		Nearctic	elevation estimated from coordinates
CASENT0868959	ANTC46130	Myrmicinae	Temnothorax	pergandei		1w	pin	pergandei group		MMPC	MEM		M.M. Prebus	2021-01-01	MacGown, J.A.	2012-06-06			sloped hardwood forest	in Carya glabra nut		Tombigbee National Forest	Winston Co.	Mississippi	United States	210m	33.2156	-89.1042		Nearctic	elevation estimated from coordinates
CASENT0868960	ANTC46130	Myrmicinae	Temnothorax	pergandei		1w	pin	pergandei group		MMPC	MEM		M.M. Prebus	2021-01-01	MacGown, J.A.	2012-06-06			sloped hardwood forest	in Carya glabra nut		Tombigbee National Forest	Winston Co.	Mississippi	United States	210m	33.2156	-89.1042		Nearctic	elevation estimated from coordinates
CASENT0868827	ANTC46130	Myrmicinae	Temnothorax	pergandei		1w	pin	pergandei group	MMPDNA#P834	MMPC	MEM		M.M. Prebus	2021-01-01	MacGown, J.A.	2012-06-06			sloped hardwood forest	in Carya glabra nut		Tombigbee National Forest	Winston Co.	Mississippi	United States	210m	33.2156	-89.1042		Nearctic	elevation estimated from coordinates
MEM 244988	ANTC46131	Myrmicinae	Temnothorax	pergandei		1w	pin	pergandei group	MMPDNA#P835	MMPC	MEM		Lewis, J.G., MacGown, J.A.	2019	Watrous, L.E.	2007-06-14				from glade soil		4 miles WSW of Eagle Rock	Barry	Missouri	United States	405m	36.5197	-93.8203		Nearctic	elevation estimated from coordinates
CASENT0759990	ANTC45758	Myrmicinae	Temnothorax	pergandei		4w	pin	pergandei group		MMPC	FSCA		LACM	1988	W.S. Creighton	1953-03-12						33 mi east of General Bravo		Nuevo Leon	Mexico	245m	25.9366	-98.6742		Nearctic
CASENT0759997	ANTC45760	Myrmicinae	Temnothorax	pergandei		1w	pin	pergandei group		MMPC	FSCA		M.M. Prebus	2018-10-31	G.A. Coovert	1997-08-21						Abner Hollow Rd., Green Twp.	Adams	Ohio	United States	170m	38.7156	-83.4381		Nearctic	coordinates and elevation estimated from label data
CASENT0759998	ANTC45760	Myrmicinae	Temnothorax	pergandei		1w	pin	pergandei group	MMPDNA#P793	MMPC	FSCA		M.M. Prebus	2018-10-31	G.A. Coovert	1997-08-21						Abner Hollow Rd., Green Twp.	Adams	Ohio	United States	170m	38.7156	-83.4381		Nearctic	coordinates and elevation estimated from label data
MEM 245132	ANTC46132	Myrmicinae	Temnothorax	pergandei		1w	pin	pergandei group	MMPDNA#P836	MMPC	MEM		Lewis, J.G., MacGown, J.A.	2019	Hill, J.G.	2012-07-09			sloped hardwood forest			Big Hill Pond State Park	McNairy	Tennessee	United States	150m	35.0442	-88.7317		Nearctic	elevation estimated from coordinates
CASENT0608346	05llaTna311	Myrmicinae	Temnothorax	pergandei		1w	pin	pergandei group		P. Hernandez	P. Hernandez		J. Longino	2009-02-20	P. Hernández	2005-07-11	2005-07-18	pitfall	xerophyl scrub			1.8km NE Tezontepec		Hidalgo	Mexico	1990m	20.2057	-99.2711	50m	Nearctic
LACMENT141184	JTL22Jul83/stray	Myrmicinae	Temnothorax	pergandei		1w	pin	pergandei group		JTLC	JTLC		J. Longino	1998-08-04	J. Longino	1983-07-22		search	piedmont woodland			9km NNE Hillsborough	Orange	North Carolina	United States	175m	36.15	-79.0667	unknown	Nearctic
LACMENT141185	JTL22Jul83/stray	Myrmicinae	Temnothorax	pergandei		1w	pin	pergandei group		JTLC	JTLC		J. Longino	1998-08-04	J. Longino	1983-07-22		search	piedmont woodland			9km NNE Hillsborough	Orange	North Carolina	United States	175m	36.15	-79.0667	unknown	Nearctic
LACMENT141186	JTL22Jul83/stray	Myrmicinae	Temnothorax	pergandei		1w	pin	pergandei group		JTLC	JTLC		J. Longino	1998-08-04	J. Longino	1983-07-22		search	piedmont woodland			9km NNE Hillsborough	Orange	North Carolina	United States	175m	36.15	-79.0667	unknown	Nearctic
LACMENT141180	JTL22Jun83/Vienna	Myrmicinae	Temnothorax	pergandei		1w	pin	pergandei group		JTLC	JTLC		J. Longino	1998-08-04	J. Longino	1983-06-22			waste ground in urban area	strays		Vienna	Fairfax	Virginia	United States	100m	38.8983	-77.2651	3km	Nearctic	coordinates estimated from label data
LACMENT141181	JTL22Jun83/Vienna	Myrmicinae	Temnothorax	pergandei		1w	pin	pergandei group		JTLC	JTLC		J. Longino	1998-08-04	J. Longino	1983-06-22			waste ground in urban area	strays		Vienna	Fairfax	Virginia	United States	100m	38.8983	-77.2651	3km	Nearctic	coordinates estimated from label data
LACMENT141182	JTL22Jun83/Vienna	Myrmicinae	Temnothorax	pergandei		1w	pin	pergandei group		JTLC	JTLC		J. Longino	1998-08-04	J. Longino	1983-06-22			waste ground in urban area	strays		Vienna	Fairfax	Virginia	United States	100m	38.8983	-77.2651	3km	Nearctic	coordinates estimated from label data
LACMENT141183	JTL22Jun83/Vienna	Myrmicinae	Temnothorax	pergandei		1w	pin	pergandei group		JTLC	JTLC		J. Longino	1998-08-04	J. Longino	1983-06-22			waste ground in urban area	strays		Vienna	Fairfax	Virginia	United States	100m	38.8983	-77.2651	3km	Nearctic	coordinates estimated from label data
JTL016439	JTL2604	Myrmicinae	Temnothorax	pergandei		1w	pin	pergandei group		Archbold or JTLC	Archbold or JTLC		M. Deyrup	1991-03-14	J. Longino	1990-02-01		search	scrubby flatwoods	under dead wood on ground		Myakka River State Park	Sarasota	Florida	United States	5m	27.2667	-82.2833	minutes	Nearctic
CASENT0756186	AMB245	Myrmicinae	Temnothorax	pilicornis_sp_nov		2w	pin	pilicornis group		MMPC	CASC	holotype of Temnothorax pilicornis (top) paratype of Temnothorax pilicornis (bottom)	M.M. Prebus	2021-01-01	A.M. Boulton	1999-07-18		pitfall trap		pitfall trap		Isla Carmen S end		Baja California Sur	Mexico	20m	25.8662	-111.216	unknown	Nearctic
CASENT0756185	RA25	Myrmicinae	Temnothorax	pilicornis_sp_nov		3w	pin	pilicornis group		MMPC	CASC		M.M. Prebus	2021-01-01	R. Aalbu & K. Brown	1999-07-13	1999-07-18	pitfall trap		oatmeal pitfall trap		Isla Carmen S end		Baja California Sur	Mexico	20m	25.8662	-111.216	unknown	Nearctic
CASENT0756184	RA24	Myrmicinae	Temnothorax	pilicornis_sp_nov		1w	pin	pilicornis group		MMPC	LACM		M.M. Prebus	2021-01-01	R. Aalbu & K. Brown	1999-07-13	1999-07-18	pitfall trap		oatmeal pitfall trap		Isla Carmen S end		Baja California Sur	Mexico	20m	25.8662	-111.216	unknown	Nearctic
CASENT0756182	RA12	Myrmicinae	Temnothorax	pilicornis_sp_nov		1w	pin	pilicornis group		MMPC	MCZC		M.M. Prebus	2021-01-01	R. Aalbu & K. Brown	1999-07-13	1999-07-18	pitfall trap		oatmeal pitfall trap		Isla Carmen S end		Baja California Sur	Mexico	20m	25.8662	-111.216	unknown	Nearctic
CASENT0756183	RA15	Myrmicinae	Temnothorax	pilicornis_sp_nov		1w	pin	pilicornis group		MMPC	USNM		M.M. Prebus	2021-01-01	R. Aalbu	1999-07-13	1999-07-18	pitfall trap		pitfall trap		Isla Carmen S end		Baja California Sur	Mexico	20m	25.8662	-111.216	unknown	Nearctic
CASENT0756196	FS72	Myrmicinae	Temnothorax	pilicornis_sp_nov		1w	pin	pilicornis group		MMPC	UCDC		M.M. Prebus	2021-01-01	F. Sanchez-Piñero	1999-05-12	1999-07-02	pitfall trap		pitfall trap		Isla Ventana		Baja California	Mexico	50m	28.9961	-113.51	1km	Nearctic	coordinates, elevation, and errors estimated from label data	50m
CASENT0756187	RA32	Myrmicinae	Temnothorax	pilicornis_sp_nov		3w	pin	pilicornis group		MMPC	UCDC		M.M. Prebus	2021-01-01	R. Aalbu	1999-07-13	1999-07-18	pitfall trap		pitfall trap		Isla Danzante		Baja California Sur	Mexico	10m	25.7833	-111.25	unknown	Nearctic
CASENT0756188	RA34	Myrmicinae	Temnothorax	pilicornis_sp_nov		1w	pin	pilicornis group		MMPC	UCDC		M.M. Prebus	2021-01-01	R. Aalbu	1999-07-13	1999-07-18	pitfall trap		pitfall trap		Isla Danzante		Baja California Sur	Mexico	10m	25.7833	-111.25	unknown	Nearctic
CASENT0756189	RA39	Myrmicinae	Temnothorax	pilicornis_sp_nov		3w	pin	pilicornis group		MMPC	UCDC		M.M. Prebus	2021-01-01	R. Aalbu	1999-07-13	1999-07-18	pitfall trap		pitfall trap		Isla Danzante		Baja California Sur	Mexico	10m	25.7833	-111.25	unknown	Nearctic
CASENT0756190	AMB244	Myrmicinae	Temnothorax	pilicornis_sp_nov		1w	pin	pilicornis group		MMPC	UCDC		M.M. Prebus	2021-01-01	A.M. Boulton	1999-07-18		pitfall trap		pitfall trap		Isla Mestiza		Baja California Sur	Mexico	10m	25.7833	-111.25	unknown	Nearctic
CASENT0756192	RA53	Myrmicinae	Temnothorax	pilicornis_sp_nov		2w	pin	pilicornis group		MMPC	UCDC		M.M. Prebus	2021-01-01	R. Aalbu	1999-07-13	1999-07-18	pitfall trap		pitfall trap		Isla Mestiza		Baja California Sur	Mexico	10m	25.8333	-111.317	unknown	Nearctic
CASENT0756191	RA48	Myrmicinae	Temnothorax	pilicornis_sp_nov		1w	pin	pilicornis group		MMPC	UCDC		M.M. Prebus	2021-01-01	R. Aalbu	1999-07-13	1999-07-18	pitfall trap		pitfall trap		Isla Mestiza		Baja California Sur	Mexico	10m	25.8333	-111.317	unknown	Nearctic
CASENT0756194	AMB242	Myrmicinae	Temnothorax	pilicornis_sp_nov		3w	pin	pilicornis group	MMPDNA#P179	MMPC	UCDC		M.M. Prebus	2021-01-01	A.M. Boulton	1999-07-18		pitfall trap		pitfall trap		Isla Pardo		Baja California Sur	Mexico	10m	25.7307	-111.225	100m	Nearctic	coordinates, elevation, and errors estimated from label data	5m
CASENT0756193	RA54	Myrmicinae	Temnothorax	pilicornis_sp_nov		1w	pin	pilicornis group		MMPC	UCDC		M.M. Prebus	2021-01-01	R. Aalbu	1999-07-13	1999-07-18	pitfall trap		pitfall trap		Isla Pardo		Baja California Sur	Mexico	10m	25.7307	-111.225	100m	Nearctic	coordinates, elevation, and errors estimated from label data	5m
CASENT0756195	RA68	Myrmicinae	Temnothorax	pilicornis_sp_nov		1w	pin	pilicornis group		MMPC	UCDC		M.M. Prebus	2021-01-01	R. Aalbu	1999-07-13	1999-07-18	pitfall trap		pitfall trap		Isla Tijeras		Baja California Sur	Mexico	20m	25.7439	-111.227	50m	Nearctic	coordinates, elevation, and errors estimated from label data	5m
MCZENT00510559	DL03475:001	Myrmicinae	Temnothorax	agavicola_sp_nov		1w	pin	pulchellus group		MMPC	MCZC	holotype of Temnothorax agavicola	M.M. Prebus	2021-01-01	D.L. Lubertazzi	2012-04-01		hand collecting	dry forest	downed wood		Jaragua NP		Pedernales	Dominican Republic	92	18.0257	-71.6473	5	Neotropical
MCZENT00510560	DL03479:001	Myrmicinae	Temnothorax	agavicola_sp_nov		1g	pin	pulchellus group		MMPC	MCZC	paratype of Temnothorax agavicola	M.M. Prebus	2021-01-01	D.L. Lubertazzi	2012-04-01		hand collecting	dry forest	under dead agave		Jaragua NP		Pedernales	Dominican Republic	92	18.0257	-71.6473	5	Neotropical
MCZENT00510561	DL03479:002	Myrmicinae	Temnothorax	agavicola_sp_nov		2w	pin	pulchellus group		MMPC	MCZC	paratype of Temnothorax agavicola	M.M. Prebus	2021-01-01	D.L. Lubertazzi	2012-04-01		hand collecting	dry forest	under dead agave		Jaragua NP		Pedernales	Dominican Republic	92	18.0257	-71.6473	5	Neotropical
MCZENT00510562	DL03479:003	Myrmicinae	Temnothorax	agavicola_sp_nov		2w	pin	pulchellus group	MMPDNA#P182	MMPC	MCZC	paratype of Temnothorax agavicola	M.M. Prebus	2021-01-01	D.L. Lubertazzi	2012-04-01		hand collecting	dry forest	under dead agave		Jaragua NP		Pedernales	Dominican Republic	92	18.0257	-71.6473	5	Neotropical
MCZENT00510541	DL03474	Myrmicinae	Temnothorax	agavicola_sp_nov		1g	pin	pulchellus group		MMPC	MCZC	paratype of Temnothorax agavicola	M.M. Prebus	2021-01-01	D.L. Lubertazzi	2012-04-01		hand collecting	dry forest	downed wood		Jaragua NP		Pedernales	Dominican Republic	92	18.0257	-71.6473	5	Neotropical
CASENT0758360	ANTC43703	Myrmicinae	Temnothorax	agavicola_sp_nov		1w	pin	pulchellus group		MMPC	USNM		M.M. Prebus	2021-01-01	M.A.Ivie,T.K.Philips&K.A.Johnson	1988-08-18				ex rotten agave		28km N Barahona		Barahona	Dominican Republic	120m	18.4668	-71.1032	1km	Neotropical	coordinates, elevation, and errors estimated from label data	5m
CASENT0756096	JKW-2010-154	Myrmicinae	Temnothorax	agavicola_sp_nov		1w	pin	pulchellus group		MMPC	MCZC		M.M. Prebus	2021-01-01	J.K. Wetterer	2010-07-09	2010-07-09	hand collecting	tropical scrub	by store		Old Airport Road	Providenciales		Turks and Caicos Islands	5m	21.775	-72.261		Neotropical	coordinates and elevation estimated from label data
CASENT0758672	JKW-2010-154	Myrmicinae	Temnothorax	agavicola_sp_nov		1w	pin	pulchellus group	MMPDNA#P161	MMPC	UCDC		M.M. Prebus	2021-01-01	J.K. Wetterer	2010-07-09		hand collecting	tropical scrub	by store		Old Airport Road	Providenciales		Turks and Caicos Islands	5m	21.775	-72.261		Neotropical	coordinates and elevation estimated from label data
CASENT0758819	JKW-2010-154	Myrmicinae	Temnothorax	agavicola_sp_nov		1w	pin	pulchellus group		MMPC	USNM		M.M. Prebus	2021-01-01	J.K. Wetterer	2010-07-09	2010-07-09	hand collecting	tropical scrub	by store		Old Airport Road	Providenciales		Turks and Caicos Islands	5m	21.775	-72.261		Neotropical	coordinates and elevation estimated from label data
LACMENT323175	ANTC43062	Myrmicinae	Temnothorax	albispinus		1w, 1g	pin	pulchellus group		MMPC	LACM		M.M. Prebus	2021-01-01	unknown	unknown						Coamo Springs	Coamo		Puerto Rico	60m	18.037	-66.3737	100m	Neotropical	coordinates, elevation, and errors estimated from label data	5m
LACMENT323245	ANTC43815	Myrmicinae	Temnothorax	albispinus		2w, 1g	pin	pulchellus group		MMPC	LACM		M.M. Prebus	2021-01-01	J.A. Torres	2000-08-28				ex sifted leaf litter		Guánica State Forest	Guánica		Puerto Rico	60	17.96	-66.87	20	Neotropical		60
LACMENT323247	ANTC43817	Myrmicinae	Temnothorax	albispinus		4w	pin	pulchellus group		MMPC	LACM		M.M. Prebus	2021-01-01	J.A. Torres	2000-01-01				ex sifted leaf litter		Guánica State Forest	Guánica		Puerto Rico	60	17.96	-66.87	20	Neotropical		60
LACMENT323241	ANTC43813	Myrmicinae	Temnothorax	albispinus		1m	pin	pulchellus group		MMPC	LACM		M.M. Prebus	2021-01-01	M. Canals	1997-06-14				lite trap		Bosque Estantal de Guanica	Guánica		Puerto Rico	60	17.84	-66.86	20	Neotropical		60
LACMENT323242	ANTC43813	Myrmicinae	Temnothorax	albispinus		1m	pin	pulchellus group		MMPC	LACM		M.M. Prebus	2021-01-01	M. Canals	1997-06-14				lite trap		Bosque Estantal de Guanica	Guánica		Puerto Rico	60	17.84	-66.86	20	Neotropical		60
LACMENT323246	ANTC43816	Myrmicinae	Temnothorax	albispinus		1w	pin	pulchellus group		MMPC	LACM		R.R. Snelling		M. Canals	1997-06-14				lite trap		Bosque Estantal de Guanica	Guánica		Puerto Rico	60	17.84	-66.86	20	Neotropical		60
LACMENT323243	RRS98-239	Myrmicinae	Temnothorax	albispinus		2w	pin	pulchellus group		MMPC	LACM		M.M. Prebus	2021-01-01	R.R. Snelling	1998-09-20			subtropical deciduous forest	ex rotten stick in leaf litter		Bosque Estantal de Guanica	Guánica		Puerto Rico	120	17.972	-66.86	20	Neotropical		10
LACMENT002310	JTL3493-s	Myrmicinae	Temnothorax	albispinus		1w	pin	pulchellus group		MMPC	LACM		J. Longino	1995-09-14	J. Longino	1993-05-30		Winkler		Dry forest. Sifted leaf litter sample. Taken from moist litter in ravine. Heav	NOTEBY J. Longino: Dry forest. Sifted leaf litter sample. Taken from moist litter in ravine. Heavy rains in past week have resulted in layer of moist leaf litter. 4 full mesh sacks filled in hotel room evening of 30 May. Sample taken off next night, 31 May.	Guánica State Forest	Guánica		Puerto Rico	50m	17.9667	-66.8833	minutes	Neotropical
LACMENT002311	JTL3493-s	Myrmicinae	Temnothorax	albispinus		1w	pin	pulchellus group	MMPDNA#P339	MMPC	UCDC		J. Longino	1995-09-14	J. Longino	1993-05-30		Winkler		Dry forest. Sifted leaf litter sample. Taken from moist litter in ravine. Heav	NOTEBY J. Longino: Dry forest. Sifted leaf litter sample. Taken from moist litter in ravine. Heavy rains in past week have resulted in layer of moist leaf litter. 4 full mesh sacks filled in hotel room evening of 30 May. Sample taken off next night, 31 May.	Guánica State Forest	Guánica		Puerto Rico	50m	17.9667	-66.8833	minutes	Neotropical
LACMENT002269	JTL3494-s	Myrmicinae	Temnothorax	albispinus		1w	pin	pulchellus group		LACM	LACM		J. Longino	1995-09-14	J. Longino	1993-05-30				Dry forest. Strays from first site.	NOTEBY J. Longino: Dry forest. Strays from first site.	Guánica State Forest	Guánica		Puerto Rico	50m	17.9667	-66.8833	minutes	Neotropical
LACMENT323244	ANTC43814	Myrmicinae	Temnothorax	albispinus		2w, 1g	pin	pulchellus group		MMPC	LACM		M.M. Prebus	2021-01-01	J.A. Torres	1991-06-07						Guánica State Forest	Guánica		Puerto Rico	50m	17.9667	-66.8833	1000	Neotropical
LACMENT323169	JAT65	Myrmicinae	Temnothorax	albispinus		3w	pin	pulchellus group		MMPC	LACM		M.M. Prebus	2021-01-01	J.A. Torres	1982-06-30						Isla de Mona	Mayagüez		Puerto Rico	30	18.0872	-67.8927	5km	Neotropical	coordinates, elevation, and errors estimated from label data	30m
LACMENT323170	JAT255	Myrmicinae	Temnothorax	albispinus		2w	pin	pulchellus group		MMPC	LACM		M.M. Prebus	2021-01-01	J.A. Torres	1982-07-04						Isla de Mona	Mayagüez		Puerto Rico	30	18.0872	-67.8927	5km	Neotropical	coordinates, elevation, and errors estimated from label data	30m
MCZENT00505426	JKW-2007-272	Myrmicinae	Temnothorax	albispinus		2w	pin	pulchellus group		MMPC	MCZC		J.K. Wetterer	2007	J.K. Wetterer	2006-06-03		hand collecting				5 min. E of antenna, Isla de Mona	Mayagüez		Puerto Rico	30	18.1	-67.927	unknown	Neotropical	elevation and elevation error estimated from label data	30m
MCZENT00505427	JKW-2007-272	Myrmicinae	Temnothorax	albispinus		2w	pin	pulchellus group		MMPC	MCZC		J.K. Wetterer	2007	J.K. Wetterer	2006-06-03		hand collecting				5 min. E of antenna, Isla de Mona	Mayagüez		Puerto Rico	30	18.1	-67.927	unknown	Neotropical	elevation and elevation error estimated from label data	30m
MCZENT00505431	JKW-2007-282	Myrmicinae	Temnothorax	albispinus		1g	pin	pulchellus group		MMPC	MCZC		J.K. Wetterer	2007	J.K. Wetterer	2006-06-03		hand collecting				50 min. E of antenna, Isla de Mona	Mayagüez		Puerto Rico	30	18.09	-67.91	unknown	Neotropical	elevation and elevation error estimated from label data	30m
CASENT0756097	ANTC43063	Myrmicinae	Temnothorax	albispinus		1w	pin	pulchellus group		MMPC	MMPC		M.M. Prebus	2021-01-01	J.K. Wetterer	2006-06-03		hand collecting	lowland tropical forest			Los Cerezos, Mona Island	Mayagüez		Puerto Rico	30m	18.089	-67.9	unknown	Neotropical	elevation and elevation error estimated from label data	30m
CASENT0756098	ANTC43063	Myrmicinae	Temnothorax	albispinus		1m	pin	pulchellus group		MMPC	MMPC		M.M. Prebus	2021-01-01	J.K. Wetterer	2006-06-03		hand collecting	lowland tropical forest			Los Cerezos, Mona Island	Mayagüez		Puerto Rico	30m	18.089	-67.9	unknown	Neotropical	elevation and elevation error estimated from label data	30m
CASENT0758674	JKW-2006-250	Myrmicinae	Temnothorax	albispinus		1w	pin	pulchellus group	MMPDNA#P163	MMPC	UCDC		M.M. Prebus	2021-01-01	J.K. Wetterer	2006-06-02						Mona Island, near antenna	Mayagüez		Puerto Rico	40	18.091	-67.936		Neotropical	elevation estimated from coordinates
CASENT0758358	ANTC43064	Myrmicinae	Temnothorax	albispinus		3w	pin	pulchellus group		MMPC	USNM		M.M. Prebus	2021-01-01		1914-02-21	1914-02-26					Isla de Mona	Mayagüez		Puerto Rico	30	18.0872	-67.8927	5km	Neotropical	coordinates, elevation, and errors estimated from label data	30m
CASENT0758359	ANTC43065	Myrmicinae	Temnothorax	albispinus		1w	pin	pulchellus group		MMPC	USNM		M.M. Prebus	2021-01-01	H.A. Beatty	1944-08-11	1944-08-31					Isla de Mona	Mayagüez		Puerto Rico	30	18.0872	-67.8927	5km	Neotropical	coordinates, elevation, and errors estimated from label data	30m
LACMENT323171	JAT516	Myrmicinae	Temnothorax	albispinus		3w	pin	pulchellus group		MMPC	LACM		M.M. Prebus	2021-01-01	J.A. Torres	1982-09-10						Cayo Luis Pena	Culebra		Puerto Rico	70m	18.3048	-65.3323	1.2km	Neotropical	coordinates, elevation, and errors estimated from label data	70m
LACMENT323172	JAT109	Myrmicinae	Temnothorax	albispinus		3w	pin	pulchellus group		MMPC	LACM		M.M. Prebus	2021-01-01	J.A. Torres	1982-03-02						Isla Piñeros	Ceiba		Puerto Rico	5	18.252	-65.5916	1km	Neotropical	coordinates, elevation, and errors estimated from label data	5m
LACMENT323173	JAT252	Myrmicinae	Temnothorax	albispinus		1w	pin	pulchellus group		MMPC	LACM		M.M. Prebus	2021-01-01	J.A. Torres	1982-07-17						Cayo Ratones	Salinas		Puerto Rico	5m	18.1167	-67.1882	50m	Neotropical	coordinates, elevation, and errors estimated from label data	5m
LACMENT323174	JAT51	Myrmicinae	Temnothorax	albispinus		3w	pin	pulchellus group		MMPC	LACM		M.M. Prebus	2021-01-01	J.A. Torres	1980-09-27						Caja de Muertos	Ponce		Puerto Rico	30	17.8953	-66.5189	1.2km	Neotropical	coordinates, elevation, and errors estimated from label data	30m
CASENT0759975	JAT51	Myrmicinae	Temnothorax	albispinus		3w	pin	pulchellus group		MMPC	FSCA		M.M. Prebus	2021-01-01	J.A. Torres	1980-09-27						Caja de Muertos	Ponce		Puerto Rico	30	17.8953	-66.5189	1.2km	Neotropical	coordinates, elevation, and errors estimated from label data	30m
CASENT0758678	DL03802	Myrmicinae	Temnothorax	bahoruco_sp_nov		1w	pin	pulchellus group	MMPDNA#P167	MMPC	UCDC	paratype of Temnothorax bahoruco	M.M. Prebus	2021-01-01	D. Lubertazzi	2014-03-30		hand collecting	open pine forest	in dead tree trunk and soil		Sierra de Baharuco NP		Pedernales	Dominican Republic	2025	18.2922	-71.6945	30	Neotropical
CASENT0758816	DL03802	Myrmicinae	Temnothorax	bahoruco_sp_nov		1w	pin	pulchellus group		MMPC	MCZC	paratype of Temnothorax bahoruco	M.M. Prebus	2021-01-01	D. Lubertazzi	2014-03-30		hand collecting	open pine forest	in dead tree trunk and soil		Sierra de Baharuco NP		Pedernales	Dominican Republic	2025	18.2922	-71.6945	30	Neotropical
CASENT0758817	DL03802	Myrmicinae	Temnothorax	bahoruco_sp_nov		1w	pin	pulchellus group		MMPC	MCZC	holotype of Temnothorax bahoruco	M.M. Prebus	2021-01-01	D. Lubertazzi	2014-03-30		hand collecting	open pine forest	in dead tree trunk and soil		Sierra de Baharuco NP		Pedernales	Dominican Republic	2025	18.2922	-71.6945	30	Neotropical
MCZENT00521421	DL03803	Myrmicinae	Temnothorax	bahoruco_sp_nov		1g	pin	pulchellus group		MMPC	MCZC	paratype of Temnothorax bahoruco	M.M. Prebus	2021-01-01	D.L. Lubertazzi	2014-03-30	2014-03-30	hand collecting	open pine forest	in dead tree trunk and soil		Sierra de Bahoruco NP		Pedernales	Dominican Republic	2025m	18.2922	-71.6945	30m	Neotropical
CASENT0758262	DL03474	Myrmicinae	Temnothorax	balaclava_sp_nov		1w	pin	pulchellus group		MMPC	MCZC	holotype of Temnothorax balaclava	M.M. Prebus	2021-01-01	D.L. Lubertazzi	2012-04-01		hand collecting	dry forest	downed wood		Jaragua NP		Pedernales	Dominican Republic	92	18.0257	-71.6473	5	Neotropical
CASENT0756153	DL03474	Myrmicinae	Temnothorax	balaclava_sp_nov		1w	pin	pulchellus group	MMPDNA#P152	MMPC	UCDC	paratype of Temnothorax balaclava	M.M. Prebus	2021-01-01	D.L. Lubertazzi	2012-04-01		hand collecting	dry forest	downed wood		Jaragua NP		Pedernales	Dominican Republic	92	18.0257	-71.6473	5	Neotropical
CASENT4010177	DL03474	Myrmicinae	Temnothorax	balaclava_sp_nov		2w	pin	pulchellus group		MMPC	CASC	paratype of Temnothorax balaclava	M.M. Prebus	2021-01-01	D.L. Lubertazzi	2012-04-01		hand collecting	dry forest	downed wood		Jaragua NP		Pedernales	Dominican Republic	92	18.0257	-71.6473	5	Neotropical
CASENT4010178	DL03474:002	Myrmicinae	Temnothorax	balaclava_sp_nov		2w	pin	pulchellus group		MMPC	USNM	paratype of Temnothorax balaclava	M.M. Prebus	2021-01-01	D.L. Lubertazzi	2012-04-01		hand collecting	dry forest	downed wood		Jaragua NP		Pedernales	Dominican Republic	92	18.0257	-71.6473	5	Neotropical
CASENT4010179	DL03476	Myrmicinae	Temnothorax	balaclava_sp_nov		1w	pin	pulchellus group		MMPC	LACM	paratype of Temnothorax balaclava	M.M. Prebus	2021-01-01	D.L. Lubertazzi	2012-04-01		hand collecting	dry forest	in soil under downed wood		Jaragua NP		Pedernales	Dominican Republic	92	18.0257	-71.6473	5	Neotropical
CASENT4010180	DL03477	Myrmicinae	Temnothorax	balaclava_sp_nov		2w	pin	pulchellus group		MMPC	MNHNSD	paratype of Temnothorax balaclava	M.M. Prebus	2021-01-01	D.L. Lubertazzi	2012-04-01		hand collecting	dry forest	under dead agave		Jaragua NP		Pedernales	Dominican Republic	92	18.0257	-71.6473	5	Neotropical
MCZENT00510544	DL03477:002	Myrmicinae	Temnothorax	balaclava_sp_nov		2w	pin	pulchellus group		MMPC	MCZC	paratype of Temnothorax balaclava	M.M. Prebus	2021-01-01	D.L. Lubertazzi	2012-04-01		hand collecting	dry forest	under dead agave		Jaragua NP		Pedernales	Dominican Republic	92	18.0257	-71.6473	5	Neotropical
MCZENT00510545	DL03477:003	Myrmicinae	Temnothorax	balaclava_sp_nov		2w	pin	pulchellus group		MMPC	MCZC	paratype of Temnothorax balaclava	M.M. Prebus	2021-01-01	D.L. Lubertazzi	2012-04-01		hand collecting	dry forest	under dead agave		Jaragua NP		Pedernales	Dominican Republic	92	18.0257	-71.6473	5	Neotropical
MCZENT00510546	DL03477:004	Myrmicinae	Temnothorax	balaclava_sp_nov		1g	pin	pulchellus group		MMPC	MCZC	paratype of Temnothorax balaclava	M.M. Prebus	2021-01-01	D.L. Lubertazzi	2012-04-01		hand collecting	dry forest	under dead agave		Jaragua NP		Pedernales	Dominican Republic	92	18.0257	-71.6473	5	Neotropical
MCZENT00510535	DL03383	Myrmicinae	Temnothorax	balaclava_sp_nov		1w	pin	pulchellus group		MMPC	MCZC		M.M. Prebus	2021-01-01	D.L. Lubertazzi	2012-03-26		hand collecting	xeric scrub on limestone	in soil and litter at base of tree		Jaragua NP		Pedernales	Dominican Republic	125	17.7922	-71.4611	5	Neotropical
MCZENT00510536	DL03388	Myrmicinae	Temnothorax	balaclava_sp_nov		1w	pin	pulchellus group		MMPC	MCZC		M.M. Prebus	2021-01-01	D.L. Lubertazzi	2012-03-26		hand collecting	xeric scrub on limestone	sifted soil and litter under half buried branch		Jaragua NP		Pedernales	Dominican Republic	125	17.7922	-71.4611	16	Neotropical
MCZENT00510537	DL03411	Myrmicinae	Temnothorax	balaclava_sp_nov		1w	pin	pulchellus group		MMPC	MCZC		M.M. Prebus	2021-01-01	D.L. Lubertazzi	2012-03-30		hand collecting	dry forest	litter at base of large tree		Jaragua NP		Pedernales	Dominican Republic	126	17.7925	-71.4638	13	Neotropical
MCZENT00510538	DL03433	Myrmicinae	Temnothorax	balaclava_sp_nov		1w	pin	pulchellus group		MMPC	MCZC		M.M. Prebus	2021-01-01	D.L. Lubertazzi	2012-03-29		hand collecting	dry forest	soil under downed wood		Jaragua NP		Pedernales	Dominican Republic	87	17.7817	-71.4401	8	Neotropical
MCZENT00510548	DL03497	Myrmicinae	Temnothorax	balaclava_sp_nov		2w	pin	pulchellus group		MMPC	MCZC		M.M. Prebus	2021-01-01	D.L. Lubertazzi	2012-04-01		hand collecting	dry forest	downed wood		Jaragua NP		Pedernales	Dominican Republic	92	18.0257	-71.6473	9	Neotropical
MCZENT00510549	DL03497:002	Myrmicinae	Temnothorax	balaclava_sp_nov		2w	pin	pulchellus group		MMPC	MCZC		M.M. Prebus	2021-01-01	D.L. Lubertazzi	2012-04-01		hand collecting	dry forest	downed wood		Jaragua NP		Pedernales	Dominican Republic	92	18.0257	-71.6473	9	Neotropical
MCZENT00510550	DL03501	Myrmicinae	Temnothorax	balaclava_sp_nov		1g	pin	pulchellus group		MMPC	MCZC		M.M. Prebus	2021-01-01	D.L. Lubertazzi	2012-03-31		hand collecting	dry forest	litter		Jaragua NP		Pedernales	Dominican Republic	92	18.0257	-71.6473	11	Neotropical
[truncated: 741 more rows]
