# Supplementary material for: Taxonomic revision of the Temnothorax salvini clade (Hymenoptera: Formicidae), with a key to the clades of New World Temnothorax
Source: PeerJ. 2021 Jun 30;9:e11514. doi: 10.7717/peerj.11514 (PMC8254503; doi:10.7717/peerj.11514)
Supplement: Supplemental Information 2 [file peerj-09-11514-s002.xlsx]

## Sheet: Sheet1
Additional table 1. List of all named Temnothorax species in the Americas, with clade membership
genus	species	author	clade (species group)
Temnothorax	andersoni	Mackay, 2000	andersoni
Temnothorax	punctatissimus	Mackay, 2000	andersoni
Temnothorax	anaphalantus	Snelling et al., 2014	andrei
Temnothorax	andrei	Emery, 1895	andrei
Temnothorax	chandleri	Mackay, 2000	andrei
Temnothorax	gallae	Smith, 1949	andrei
Temnothorax	myrmiciformis	Snelling et al., 2014	andrei
Temnothorax	nevadensis	Wheeler, 1903	andrei
Temnothorax	nitens	Emery, 1895	andrei
Temnothorax	oxynodis	Mackay, 2000	andrei
Temnothorax	paiute	Snelling et al., 2014	andrei
Temnothorax	pseudandrei	Snelling et al., 2014	andrei
Temnothorax	quasimodo	Snelling et al., 2014	andrei
Temnothorax	rudis	Wheeler, 1917	andrei
Temnothorax	wardi	Snelling et al., 2014	andrei
Temnothorax	cuyaguateje	Fontenla Rizo, 1998	incertae sedis
Temnothorax	imias	Fontenla Rizo, 1998	incertae sedis
Temnothorax	creolus	Baroni Urbani, 1978	obturator
Temnothorax	emmae	Mackay, 2000	obturator
Temnothorax	obturator	Wheeler, 1903	obturator
Temnothorax	whitfordi	Mackay, 2000	obturator
Temnothorax	ambiguus	Emery, 1895	palearctic
Temnothorax	americanus	Emery, 1895	palearctic
Temnothorax	curvispinosus	Mayr, 1866	palearctic
Temnothorax	duloticus	Wesson, 1937	palearctic
Temnothorax	furunculus	Wheeler, 1909	palearctic
Temnothorax	longispinosus	Roger, 1863	palearctic
Temnothorax	minutissimus	Smith, 1942	palearctic
Temnothorax	pilagens	Seifert et al., 2014	palearctic
Temnothorax	tuscaloosae	Wilson, 1951	palearctic
Temnothorax	bradleyi	Wheeler, 1913	rugatulus
Temnothorax	caguatan	Snelling et al., 2014	rugatulus
Temnothorax	fragosus	Mackay & Buschinger, 2002	rugatulus
Temnothorax	josephi	Mackay, 2000	rugatulus
Temnothorax	rugatulus	Emery, 1895	rugatulus
Temnothorax	schaumii	Roger, 1863	rugatulus
Temnothorax	smithi	Baroni Urbani, 1978	rugatulus
Temnothorax	abeli	Fontenla Rizo, 1998	sallei
Temnothorax	adustus	Mackay, 2000	sallei
Temnothorax	alayoi	Baroni Urbani, 1978	sallei
Temnothorax	allardycei	Mann, 1920	sallei
Temnothorax	arboreus	Snelling et al., 2014	sallei
Temnothorax	banao	Fontenla Rizo, 1998	sallei
Temnothorax	barbouri	Aguayo, 1931	sallei
Temnothorax	barroi	Aguayo, 1931	sallei
Temnothorax	bermudezi	Wheeler, 1931	sallei
Temnothorax	bestelmeyeri	Mackay, 2000	sallei
Temnothorax	bicolor	Mackay, 2000	sallei
Temnothorax	brevispinosus	Mackay, 2000	sallei
Temnothorax	bristoli	Mackay, 2000	sallei
Temnothorax	bruneri	Mann, 1924	sallei
Temnothorax	carinatus	Cole, 1957	sallei
Temnothorax	cokendolpheri	Mackay, 2000	sallei
Temnothorax	coleenae	Mackay, 2000	sallei
Temnothorax	creightoni	Mann, 1929	sallei
Temnothorax	darlingtoni	Wheeler, 1937	sallei
Temnothorax	dissimilis	Aguayo, 1932	sallei
Temnothorax	gibbifer	Baroni Urbani, 1978	sallei
Temnothorax	gundlachi	Wheeler, 1913	sallei
Temnothorax	hispaniolae	Baroni Urbani, 1978	sallei
Temnothorax	hispidus	Cole, 1957	sallei
Temnothorax	iris	Roger, 1863	sallei
Temnothorax	isabellae	Wheeler, 1908	sallei
Temnothorax	laetus	Wheeler, 1937	sallei
Temnothorax	liebi	Mackay, 2000	sallei
Temnothorax	manni	Wheeler, 1914	sallei
Temnothorax	mexicanus	Mackay, 2000	sallei
Temnothorax	morongo	Snelling et al., 2014	sallei
Temnothorax	mortoni	Aguayo, 1937	sallei
Temnothorax	myersi	Wheeler, 1931	sallei
Temnothorax	neomexicanus	Wheeler, 1903	sallei
Temnothorax	nipensis	Fontenla Rizo, 1998	sallei
Temnothorax	nuwuvi	Snelling et al., 2014	sallei
Temnothorax	obliquicanthus	Cole, 1953	sallei
Temnothorax	palustris	Deyrup & Cover, 2004	sallei
Temnothorax	peninsularis	Wheeler, 1934	sallei
Temnothorax	platycnemis	Wheeler, 1937	sallei
Temnothorax	poeyi	Wheeler, 1913	sallei
Temnothorax	porphyritis	Roger, 1863	sallei
Temnothorax	punctaticeps	Mackay, 2000	sallei
Temnothorax	punctithorax	Mackay, 2000	sallei
Temnothorax	punicans	Roger, 1863	sallei
Temnothorax	purpuratus	Roger, 1863	sallei
Temnothorax	rugithorax	Mackay, 2000	sallei
Temnothorax	rugulosus	Mackay, 2000	sallei
Temnothorax	sallei	Guérin-Méneville, 1852	sallei
Temnothorax	schmittii	Wheeler, 1903	sallei
Temnothorax	senectutis	Baroni Urbani, 1978	sallei
Temnothorax	silvestrii	Santschi, 1911	sallei
Temnothorax	splendens	Wheeler, 1905	sallei
Temnothorax	squamifer	Roger, 1863	sallei
Temnothorax	stenotyle	Cole, 1956	sallei
Temnothorax	stollii	Forel, 1885	sallei
Temnothorax	striatulus	Stitz, 1937	sallei
Temnothorax	texanus	Wheeler, 1903	sallei
Temnothorax	totonicapani	Baroni Urbani, 1978	sallei
Temnothorax	tricarinatus	Emery, 1895	sallei
Temnothorax	versicolor	Roger, 1863	sallei
Temnothorax	versicolor guanahacabibes	Fontenla Rizo, 1995	sallei
Temnothorax	villarensis	Aguayo, 1931	sallei
Temnothorax	violaceus	Mann, 1924	sallei
Temnothorax	wheeleri	Mann, 1920	sallei
Temnothorax	acuminatus sp. nov.	this study	salvini (acuminatus)
Temnothorax	tuxtlanus sp. nov.	this study	salvini (acuminatus)
Temnothorax	acutispinosus sp. nov.	this study	salvini (acutispinosus)
Temnothorax	altinodus sp. nov.	this study	salvini (altinodus)
Temnothorax	annexus	Baroni Urbani, 1978	salvini (annexus)
Temnothorax	arbustus sp. nov.	this study	salvini (annexus)
Temnothorax	balnearius sp. nov.	this study	salvini (annexus)
Temnothorax	obtusigaster sp. nov.	this study	salvini (annexus)
Temnothorax	quercicola sp. nov.	this study	salvini (annexus)
Temnothorax	augusti	Baroni Urbani, 1978	salvini (augusti)
Temnothorax	aureus sp. nov.	this study	salvini (augusti)
Temnothorax	leucacanthoides sp. nov.	this study	salvini (augusti)
Temnothorax	leucacanthus	Baroni Urbani, 1978	salvini (augusti)
Temnothorax	casanovai sp. nov.	this study	salvini (casanovai)
Temnothorax	clandestinus sp. nov.	this study	salvini (clandestinus)
Temnothorax	nebliselva sp. nov.	this study	salvini (fuscatus)
Temnothorax	fuscatus	Mann, 1920	salvini (fusctatus)
Temnothorax	ocarinae	Baroni Urbani, 1978	salvini (fusctatus)
Temnothorax	skwarrae	Wheeler, 1931	salvini (fusctatus)
Temnothorax	achii sp. nov.	this study	salvini (goniops)
Temnothorax	goniops	Baroni Urbani, 1978	salvini (goniops)
Temnothorax	huehuetenangoi	Baroni Urbani, 1978	salvini (goniops)
Temnothorax	ixili	Baroni Urbani, 1978	salvini (goniops)
Temnothorax	xincai sp. nov.	this study	salvini (goniops)
Temnothorax	androsanus	Wheeler, 1905	salvini (pastinifer)
Temnothorax	nigricans	Baroni Urbani, 1978	salvini (pastinifer)
Temnothorax	pastinifer	Emery, 1894	salvini (pastinifer)
Temnothorax	rutabulafer sp. nov.	this study	salvini (pastinifer)
Temnothorax	schwarzi	Mann, 1920	salvini (pastinifer)
Temnothorax	bison sp. nov.	this study	salvini (pergandei)
Temnothorax	pergandei	Emery, 1895	salvini (pergandei)
Temnothorax	pilicornis sp. nov.	this study	salvini (pilicornis)
Temnothorax	agavicola sp. nov.	this study	salvini (pulchellus)
Temnothorax	albispinus	Wheeler, 1908	salvini (pulchellus)
Temnothorax	bahoruco sp. nov.	this study	salvini (pulchellus)
Temnothorax	balaclava sp. nov.	this study	salvini (pulchellus)
Temnothorax	ciferrii	Menozzi & Russo, 1930	salvini (pulchellus)
Temnothorax	flavidulus	Wheeler & Mann, 1914	salvini (pulchellus)
Temnothorax	harlequina sp. nov.	this study	salvini (pulchellus)
Temnothorax	hippolytus sp. nov.	this study	salvini (pulchellus)
Temnothorax	laticrus sp. nov.	this study	salvini (pulchellus)
Temnothorax	magnabulla sp. nov.	this study	salvini (pulchellus)
Temnothorax	pulchellus	Emery, 1894	salvini (pulchellus)
Temnothorax	terricola	Mann, 1920	salvini (pulchellus)
Temnothorax	torrei	Aguayo, 1931	salvini (pulchellus)
Temnothorax	wettereri sp. nov.	this study	salvini (pulchellus)
Temnothorax	wilsoni sp. nov.	this study	salvini (pulchellus)
Temnothorax	parralensis sp. nov.	this study	salvini (rugosus)
Temnothorax	rugosus	Mackay, 2000	salvini (rugosus)
Temnothorax	aztecoides sp. nov.	this study	salvini (salvini)
Temnothorax	aztecus	Wheeler, 1931	salvini (salvini)
Temnothorax	fortispinosus sp. nov.	this study	salvini (salvini)
Temnothorax	longicaulis stat. nov., nom. nov.	this study	salvini (salvini)
Temnothorax	longinoi sp. nov.	this study	salvini (salvini)
Temnothorax	paraztecus sp. nov.	this study	salvini (salvini)
Temnothorax	parvidentatus sp. nov.	this study	salvini (salvini)
Temnothorax	quetzal sp. nov.	this study	salvini (salvini)
Temnothorax	salvini	Forel, 1899	salvini (salvini)
Temnothorax	terraztecus sp. nov.	this study	salvini (salvini)
Temnothorax	politus	Smith, 1939	salvini (subditivus)
Temnothorax	subditivus	Wheeler, 1903	salvini (subditivus)
Temnothorax	tenuisculptus	Baroni Urbani, 1978	salvini (tenuisculptus)
Temnothorax	terrigena	Wheeler, 1903	salvini (terrigena)
